# Supplementary material for: The ‘analysis of gene expression and biomarkers for point-of-care decision support in Sepsis‘ study; temporal clinical parameter analysis and validation of early diagnostic biomarker signatures for severe inflammation andsepsis-SIRS discrimination
Source: Front Immunol. 2024 Jan 25;14:1308530. doi: 10.3389/fimmu.2023.1308530 (PMC10850284; doi:10.3389/fimmu.2023.1308530)
Supplement: Supplementary file 3 [file Table_1.xlsx]

## Sheet: Table S1.1
Inclusion Criteria for Severe Sepsis and Septic Shock	Inclusion Criteria for Healthy Controls
1. Age => 16	• Age >18
2. Diagnosis of severe sepsis	• Consent to take part in the trial as a volunteer
• SEPSIS is defined as a (1) DEFINED FOCUS OF INFECTION AND (2) at least TWO systemic	Exclusion criteria:
inflammatory response syndrome (SIRS) criteria.	• Presence of current or chronic infection
a) (1) DEFINED FOCUS OF INFECTION is indicated by either	• severe immune deficiency, for example a diagnosis of AIDS
i. An organism grown in blood or sterile site OR	• anti-rejection transplant drugs, methotrexate, high dose corticosteriod treatment (>10mg
ii. An abscess or infected tissue (e.g. pneumonia, peritonitis, urinary tract, vascular line	prednisolone/day or equivalent)
infection, soft tissue, etc).	• severe acute or chronic liver disease
b) (2) The 4 SIRS criteria are:	• presence of malignancy which is currently treated with chemo- or radiotherapy
i. CORE TEMPERATURE >38°C or <36°C. (Core temperature is rectal, urinary bladder,	• Irreversible disease with <6 months prognosis
central line, or tympanic). If oral, inguinal or axillary temperatures are used, add 0.5°C
to the measured value. Hypothermia <36°C must be confirmed by core temperature
only. Use the most deranged value recorded in the 24 hours before ICU admission.
ii. HEART RATE >90 beats/minute. If patient had an atrial arrhythmia, record the
ventricular rate. If patients have a known medical condition or are receiving treatment
that would prevent tachycardia (for example, heart block or beta blockers), they must
meet two of the remaining three SIRS criteria. Use the most deranged value recorded in
the 24 hours before ICU admission.
iii. RESPIRATORY RATE > 20 breaths per minute or a PaCO2 < 4.3 kPa (32 mmHg) or
mechanical ventilation for an acute process. Use the most deranged respiratory rate or
PaCO2 recorded in the 24 hours before ICU admission.
iv. WHITE BLOOD CELL COUNT of >12 x 109/l or < 4 x 109/l or > 10% immature
neutrophils (band forms). Use the most deranged value recorded in the 24 hours before
ICU admission.
• SEVERE SEPSIS is defined as SEPSIS plus at least ONE ORGAN FAILURE, except when
that organ failure was already present 48 hours before the onset of sepsis.
• ORGAN FAILURE is defined as a Sequential Organ Failure Assessment (SOFA) score > 2 for
the organ in question
3. Presenting to hospital with abdominal or pulmonary sepsis of less than 72 hours duration
4. patient already has or will require arterial cannulation as part of standard treatment
Inclusion Criteria for Critically Ill patients without infection
1. Patients admitted to the ICU following out-of hospital cardiac arrest
2. SIRS criteria as above
3. Organ failure criteria as above
4. Patients must not be receiving antibiotics for treatment of known or suspected infection
5. patient already has or will require arterial cannulation as part of standard treatment
Exclusion Criteria
• age <16
• pregnant
• severe immune deficiency, for example
a diagnosis of AIDS
anti-rejection transplant drugs
• methotrexate
high dose corticosteriod treatment (>10mg prednisolone/day or equivalent)
• Severe Liver Failure
Childs III or worse

## Sheet: Table S1.2
Disease Group	Disease sub-type	SampleSpecificID	AnalysisID	Outofhospitalcardiacarrest	Age	Sex	Ethnicity	Analysed for Gene expression	SampleS Collected/ Days Analysed	Survived/ Did not Survive	APACHEIIScoreonadmission	SeveresepsisasdefinedbytheSOFAscoreonDay1	SOFA Overall Score Day 1	SOFA Overall Score Day 2	SOFA Overall Score Day 5	SOFA Overall Score Day Discharge	White Blood Cells D1	Neutrophils D1	Lymphocytes D1	Basophils D1	Platelets D1	CRP D1	White Blood Cells D2	Neutrophils D2	Lymphocytes D2	Basophils D2	Platelets D2	CRP D2	White Blood Cells D5	Neutrophils D5	Lymphocytes D5	Basophils D5	Platelets D5	CRP D5	White Blood Cells Discharge	Neutrophils Discharge	Lymphocytes Discharge	Basophils Discharge	Platelets Discharge	CRP Discharge
SIRS	OOHCA	1	37	1	54	Male	White British	N	1,2,5	DNS	19	0	16		15		4.3	3.8	0.3	0	59	120.3
SIRS	OOHCA	2	38	1	72	Male	Any white	Y	1,2	DNS	35	0	20	18			21.2	18.8	1.1	0	281	138.5	20.6	16.9	2.2	0	217	138.5
SIRS	OOHCA	6	41	1	19	Male	Any White	Y	1,2,5	DNS	31	0	14	21	15		30	27.8	0.6	0	226	32.4	1.2	1	0.2	0	119	136.5	19.4	17	1.2	0	84	107
SIRS	OOHCA	12	2	1	77	Male	White British	Y	1,2,D	S	30	0	16	17		10	9.58	7.45	1.13	0.01	182	3	8.71	7.63	0.43	0.02	124	52							11.7	8.87	1.34	0.04	177	128
SIRS	OOHCA	13	3	1	36	Male	White British	Y	1,2,D	S	24	0	16	16			12.14	10.48	0.45	0.01	273	25	10.46	9.2	0.49	0.02	239								10.13	8.37	0.78	0.02	254	49
SIRS	OOHCA	15	5	1	33	Male	White British	Y	1,2	S	25	0	16	17			7.1	4.7	1.99	0.01	131	17	6.91	4.95	1.46	0.02	113	105							7.46	4.74	1.9	0.01	151	73
SIRS	OOHCA	19	9	1	56	Female	White British	Y	1,2,5	S	28	0	14	16	13		9.29	7.26	1.28	0.02	263	1	7.06	5.15	0.95	0.04	208	15	8.44	7.08	0.43	0.01	175	95	6.51	4.39	0.86	0.01	240	99
SIRS	OOHCA	21	132	1	64	Male	White British	N	1,2,5	DNS	26	0	14		14
SIRS	OOHCA	27	138	1	53	Male	White British	Y	1,2	S	21	0	18	17	6	6	15.2	13.3	0.5	0	191	34	9.5	7.3	0.9	0	136	165	9.4	7.2	0.9	0	289		9.4	7.2	0.9	0	289
SIRS	OOHCA	29	140	1	55	Male	Any White	Y	1	DNS	34	0	17			15	16.3	14.7	0.4	0	199	5	10.4	8.1	1	0	160	56	11	8.3	0.8	0.1	198	62	11	8.3	0.8	0.1	198	62
SIRS	OOHCA	30	44	1	74	Male	Any White	Y	1,2,5	DNS	38	0	16	16	15		16.2	14.2	0.6	0	213	99.3	15.6	13.2	1	0	220	230.8	13.3	10.8	1.2	0	284	166.7
SIRS	OOHCA	32	46	1	33	Male	Any White	Y	1,2,5	S	33	0	20	18	11	10	24.6	22.5	1	0	150	97.8	13.9	11	1.9	0	143	251.5	11.7	9.1	1.2	0	170	137.4	16.7	13.6	1.5	0.1	635	225.5
SIRS	OOHCA	34	48	1	41	Male	Any white	Y	1,2,D	S	30	0	17	15		9	22.7	19.3	2.4	0.1	245	23.4	10.3	8.5	1.3	0	142	238.5							5.6	3.6	1.4	0	141	177
SIRS	OOHCA	40	10	1	57	Male	White British	Y	1,2	S	28	0	16	16		9	6.07	4.02	1.5	0.01	139	2	4.69	3.83	0.54	0.01	107	45							10.46	9.03	0.74	0.01	128	60
SIRS	OOHCA	41	11	1	59	Male	White British	Y	1,2,5	DNS	29	0	17	16	13		16.89	15.08	0.69	0.03	162	4	15.93	12.41	2.34	0.02	232	56	10.15	8.03	1.22	0	167	195
SIRS	OOHCA	42	12	1	50	Male	Asian Chinese	Y	1,2	S	26	0	15	15		12	17.2	14.88	0.6	0.02	143	1	7.27	5.22	1.26	0	86	63							8.71	6.45	1.37	0	97	77
SIRS	OOHCA	43	13	1	62	Male	White British	Y	1,2,5,D	S	27	0	15	15		11	12.9	10.13	1.48	0.01	173	11	15.53	14.29	0.33	0.02	130	126							10.96	10.24	0.3	0.01	120	191
SIRS	OOHCA	45	15	1	65	Male	White British	Y	1,2,5	S	30	0	16	16	14		18.14	15.09	1.45	0.02	329	10	10.65	8.32	1.06	0.01	211	86	8.84	6.14	1.27	0.01	242	138	12.98	9.75	2.17	0.03	302	44
SIRS	OOHCA	46	16	1	17	Female	White British	Y	1,2,D	S	27	0	13	13			7.8	6.05	1.08	0.01	223	51	7.11	5.23	0.89	0.01	209	85							8.23	4.68	2.18	0.01	307	13
SIRS	OOHCA	48	18	1	74	Male	White British	Y	1, 2, D	DNS	39	1	18	21		20	19.15	16.8	0.84	0.02	177	44	12.15	10.44	0.94	0	99	141							9.64	7.85	0.84	0.01	72	380
SIRS	OOHCA	49	19	1	62	Female	White British	Y	1,2,5	S	34	0	18	18	10		5.61	4.15	0.92	0.02	170	127	9.41	8.48	0.46	0	196	179	5.61	4.17	0.67	0.01	169	61	12.09	9.13	1.76	0.02	176	29
SIRS	OOHCA	51	142	1	68	Male	White British	Y	1,2,5,D	S	23	0	11	12	16	6	9.6	8.4	0.5	0	173	28	8.1	7.1	0.5	0	154	131	7.3	5.7	0.5	0	167	184	13.2	10.8	1.2	0.1	225	111
SIRS	OOHCA	53	144	1	66	Male	White British	Y	1,2	DNS	33	0	16	19			9.1	8.1	0.5	0	125	40	4.2	3.6	0.3	0	58	157
SIRS	OOHCA	56	147	1	72	Male	White British	Y	1,2	DNS	37	0	19	18			23.3	19.6	2.8	0.2	274	3	8.1	6.8	0.7	0	157	48
SIRS	OOHCA	64	57	1	71	Female	Any White	Y	1,2	DNS	38	0	14	11			48.5	41.8	4.5	0.1	350	24.4	18.7	15.4	1.7	0	234	89
SIRS	OOHCA	70	20	1	64	Male	Asian	Y	1,2			0	14	16			11.75	10.26	0.7	0	158	1	9.46	8.22	0.58	0.01	101	29	6.89	5.57	0.64	0.01	111	142
SIRS	OOHCA	74	25	1	52	Female	White British	Y	1,2,D	S	18	0	15	17		8	10.56	7.37	2.28	0.02	291	56	12	9.29	2.6	0.02	240	105							18.33	14.98	2.6	0.02	282	181
SIRS	OOHCA	77	27	1	54	Male	Any white	Y	1,2,5		37	0	19				8.98	7.19	0.84	0.01	168	77						111	4.54	2.6	0.93	0.01	190	149
SIRS	OOHCA	78	28	1	46	Male	White British	Y	1,2	S		0	14	14			27.65	25.24	1.41	0	234	57	15.45	12.5	2.22	0.02	148	154
SIRS	OOHCA	83	66	1	74	Male	Any White	Y	1	DNS	41	0	16				5.7	4.6	0.6	0	108	75.5
SIRS	OOHCA	98	159	1	74	Male	White British	Y	1,5	S	14	0	18	18	9	9	27.3	24.5	0.8	0.1	227	27	19.8	17.9	0.6	0.1	175	175	12.3	10.9	0.7	0	179	80	12.3	10.9	0.7	0	179	80
SIRS	OOHCA	99	160	1	70	Male	White British	N			31	0	13			13	14.2	11	7.3	0	231	26													14.2	11	7.3	0	231	26
SIRS	OOHCA	100	73	1	67	Female	Any White	Y	1,2,5	S	38	0	18	17	18		23.8	19.6	2.9	0	273	2.5	4.7	4.2	0.4	0	196	280.7	15.3	14	0.8	0	252	492.7
SIRS	OOHCA	102	75	1	58	Male	Any white	Y	1,2,5	DNS	42	0	20	18	12		24.1	20.6	1	0.1	198	59	21.9	19.7	0.5	0.1	127	234	12.8	10.9	0.8	0	127	82
SIRS	OOHCA	132	173	1	27	Male	white british	Y	1,2,5	S	28	0	12	9		9	10.3	6.7	2.3	0	159	11	14	11.4	1.2	0.1	117	72
SIRS	OOHCA	135	176	1	72	Male	White and Black Carribean	Y	1,2	DNS	33	0	18	18			14.9	14	0.5	0	129	19	11.5	10.5	0.6	0	118	220
SIRS	OOHCA	156	98	1	55	Female	White British	Y	1,2,5	S	33	0	17	17	15		25.7	20.2	4.6	0.1	213	2
SIRS	OOHCA	188	187	1	63	Male	White British	Y	1,2	DNS	30	0	18	17			8.1	3.8	3.8	0.1	170	3	10.4	9.2	0.6	0	127	136
SIRS	OOHCA	190	103	1	76	Male	Any White	Y	1,2,5,D	S	30	0	19	20	15	9	6.7	5.2	0.8	0	127	9	6.7	4.8	1.3	0	127	20	7	5.2	0.8	0	102	205	8.1	6	1.1	0	326	242
SIRS	OOHCA	192	101	1	76	Female	Any White	Y	1	S	31	0	15				17	14	1.4	0	226	42
SIRS	OOHCA	218	120	1	39	Male	Any White	Y	1,2	DNS	27	0	14	13			12.7	11.3	1	0	242	42	15.9	14.6	0.5	0	219	236
SIRS	OOHCA	None	24	1	64	Male	White British	N			19	0	20	14	10		14.85	12.43	1.17	0.02	89	29	17.49	15.18	1.12	0.02	83	153

## Sheet: Table S1.3
Disease	Disease sub-type	SampleSpecificID	AnalysisID	Outofhospitalcardiacarrest	Age	Sex	Ethnicity	Analysed for Gene expression	SampleS Collected/ Days Analysed	Survived/ Did not Survive	APACHEIIScoreonadmission	SeveresepsisasdefinedbytheSOFAscoreonDay1	SOFA Overall Score Day 1	SOFA Overall Score Day 2	SOFA Overall Score Day 5	SOFA Overall Score Day Discharge	White Blood Cells D1	Neutrophils D1	Lymphocytes D1	Basophils D1	Platelets D1	CRP D1	White Blood Cells D2	Neutrophils D2	Lymphocytes D2	Basophils D2	Platelets D2	CRP D2	White Blood Cells D5	Neutrophils D5	Lymphocytes D5	Basophils D5	Platelets D5	CRP D5	White Blood Cells Discharge	Neutrophils Discharge	Lymphocytes Discharge	Basophils Discharge	Platelets Discharge	CRP D5
Sepsis	Pulmonary	4	39	0	87	Female	Any White	Y	1,2	DNS	40	1	18	17			10.7	10	0.3	0.5	161	153.2	11.6	10.5	0.4	0	158	295.8
Sepsis	Abdominal	5	40	0	86	Male	Any white	Y	1,2,D	S	35	1	19	14		13	15.8	14.7	0.6	0	138	345	20.7	18.6	0.7	0	198	342	8.4	6.3	1	0.1	132	77	10.7	7.9	1.7	0.1	158	54
Sepsis	Pulmonary	7	42	0	50	Female	Any White	Y	1,D	S	29	1	10			10	1.1	0.7	0.3	0	146	320.7	3.9	3.4	0.3	0	176	526.5	5.5	4.4	0.4	0	157	317.8
Sepsis	Abdominal	8	43	0	70	Male	Any white	Y	1	DNS	37	1	18				14.7	4.3	0.4	0	147	17.6	7.7	6.7	0.5	0	154	276.8							6.8	5.6	0.5	0	136	174.2
Sepsis	Abdominal	11	1	0	76	Female	white british	N			31	1	21	19	18		35.1	33.8	0.4	0	106	346	29.1	27.2	1.1	0	104	299
Sepsis	Abdominal	14	4	0	67	Female	White British	Y	1,2,5	DNS	38	1	19	19	18		21.6	20.9	0.3	0	139	109.2													17.8	16.8	0.6	0	148	323.9
Sepsis	Pulmonary	16	6	0	69	Female	White British	Y	1,2,5,D	S	32	1	15	14	14		26.1	23.2	0.4	0	324	100.8	18.7	17.1	0.3	0	211	90	19.5	17.4	0.4	0	270	49.7
Sepsis	Abdominal	17	7	0	77	Male	White British	Y	1,2,5,D	S	30	1	22	22	18		11.2	9.8	0.7	0	188	342.1
Sepsis	Pulmonary	20	131	0	80	Male	White British	Y	1	DNS	17	1	16				15.2	13.1	0.8	0	258
Sepsis	Pulmonary	22	133	0	73	Male	White British	Y	1,2,5	S	21	1	14	9	12	12	10.4	8.4	1.4	0	420	235	11.3	9.1	1.4	0	380	248.4	11.6	9.2	1.5	0	372	239.5
Sepsis	Abdominal	23	134	0	72	Female	Carribean	N			28	1	13	18			22.2	20.7	0.5	0	184	60	15.2	13.7	0.5	0	153	33	18.5	15.9	0.7	0.1	253	57
Sepsis	Pulmonary	24	135	0	59	Male	White British	N			10	1	16	17	16	6	25.3	21.3	1.4	0.1	297	154							27.4	20.6	3.5	0.2	338	400
Sepsis	Pulmonary	25	136	0	76	Female	White British	Y	1,2,5,D	S	30	1	20	16	12	9	33.7	33	0.3	0	220	252.7	25.3	23.9	0.3	0	155	205.3							10.2	7.6	0.6	0	89	133.6
Sepsis	Abdominal	26	137	0	55	Male	British British	N			32	1	23	23	22		17	12.6	2.8	0	315	302
Sepsis	Abdominal	28	139	0	87	Male	White British	Y	1	DNS	13	1	14	14	6	6	13.2	12.12	0.67	0.01	81	278	17.67	16.59	0.56	0.02	89	338	24.25	21.41	1.33	0.17	118	11	9.6	7.34	1.27	0.07	343	79
Sepsis	Pulmonary	31	45	0	58	Female	Any White	Y	1,2	DNS	44	1	14	14		14	3.01	2	0.98	0.01	386	88	5.18	4.37	0.74	0.01	142	253	7.15	6.21	0.68	0.01	74	262
Sepsis	Pulmonary	33	47	0	62	Female	Any White	Y	1,2,5,D	S	45	1	17	19	15		24.8	14.6	0.7	0	45	266.7	22.4	20.2	1.3	0	48	212.9	13.8	11.6	1	0	94	62.7
Sepsis	Abdominal	35	49	0	70	Female	Any White	Y	1,2,5	S	31	1	17	16	8		18	10.4	6.2	0.1	365	14	8.9	7.6	0.6	0	167	65
Sepsis	Pulmonary	37	50	0	74	Male	Any White	Y	1,2,5,D	S	41	1	18	14	7		18.1	17	0.7	0	916	250.2	19.6	18	0.9	0	740	319.6
Sepsis	Abdominal	38	51	0	68	Female	Any White	Y	1,D	S	26	1	17			8	34.6	31.7	1.5	0.1	340	282.1	25.3	23.7	1.1	0	231	171.6	25.5	23	1.7	0.1	212	52.6	22.9	19.7	2.2	0	264	21.4
Sepsis	Abdominal	39	52	0	81	Female	Any White	Y	1,2,5	S	38	1	18	17			15.94	14.9	0.96	0.02	257	303	16.09	14.3	1.18	0.02	269	407	12.04	9.42	1.3	0.07	238	151	13.88	10.55	2.33	0.03	249	25
Sepsis	Pulmonary	44	14	0	51	Male	Whitw British	Y	1,D	S	24	1	16	13	9		15.58	8.6	0.62	0.02	95	238	15.92				41	190	29.49	26.06	1.44	0.12	61	57	12.11	10.6	0.48	0.02	280	124
Sepsis	Pulmonary	47	17	0	60	Male	WhiteOther	N			46	1	21				17.6	16.4	0.2	0	189	223	19.6	18.1	0.7	0	135	272	11.9	10.1	1	0	292	37
Sepsis	Pulmonary	50	141	0	72	Male	White British	Y	1,2,5	S	27	1	17	17	11		14.15	13.44	0.54	0.01	70	293	16.51	15.08	0.93	0.02	53	269	13.51	10.36	2.14	0.03	57	47	9.65	7.04	1.75	0.01	103	39
Sepsis	Pulmonary	52	143	0	73	Male	White British	Y	1,2,5,D	S	22	1	18	16	14	10	3.11	2.22	0.47	0	213	151	2.04	1.32	0.45	0	176	128	3.19	2.35	0.52	0.01	209	110	5.14	3.58	0.8	0.02	424	35
Sepsis	Pulmonary	54	145	0	63	Female	White British	Y	1,2	S	40	1	19	18	18		4.4	2.7	1.4	0	229	160	9.2	7	1.4	0	134	256
Sepsis	Pulmonary	55	146	0	44	Female	White British	Y	1,2,5	S	23	1	17	21	14		11	10.5	0.3	0.1	53	404	11.8	11.1	0.2	0.1	78	431	7.8	6.9	0.3	0	197
Sepsis	Pulmonary	57	148	0	55	Female	White British	Y	1,2,5	S	44	1	20	20	17	7	16.7	10.2	0.3	0	255	95	7.8	6.8	0.5	0	178	115	7.1	5.7	0.7	0	144	86
Sepsis	Abdominal	58	149	0	85	Male	Any other white background	Y	1	S	13	1	8				10.8	9.6	0.7	0.1	179	264	9.5	8.8	0.5	0	70	516	10.8	8.6	1	0.1	48	175
Sepsis	Abdominal	59	150	0	79	Male	White British	Y	1,2,5,D	S	13	1	11	14	11	6	11	9.6	1	0	112	338.1													9.2	7	1.5	0	133	238.1
Sepsis	Pulmonary	60	53	0	41	Male	Any White	Y	1,2,5	S	25	1	18	16	14		25.1	21.6	2.4	0	300	15.1	13.8	12.3	0.6	0	249	58	10.6	9	0.9	0	130	47.7	9.2	6.8	1.3	0	342	27.9
Sepsis	Pulmonary	61	54	0	74	Female	Any white	Y	1,2,5	DNS	40	1	15	15	13		25.65	23.62	0.95	0.03	347	14	9.51	7.52	0.89	0.02	444	86	10.08	7.65	1.32	0.02	235	9	14.14	9.63	2.63	0.06	307	3
Sepsis	Abdominal	62	55	0	65	Male	Any white	Y	1	S	34	1	15				6.1	5.1	0.7	0	243	412.7	7.5	6.3	0.6	0	272	440.6
Sepsis	Pulmonary	63	56	0	76	Male	Any White	Y	1,2,5	S	34	1	18	17	18		33.7	30	1.3	0.2	52	366	47.6	45.9	1	0.1	42	158	36	31.8	3.5	0.1	14	84
Sepsis	Abdominal	65	58	0	77	Female	Any White	N		S	35	1	15	15		15	25.9	24.9	0.3	0	213	55	15.8	14.7	0.5	0	191	85	13	11.3	0.7	0	157	19
Sepsis	Abdominal	66	59	0	75	Female	Any White	Y	1,2,5	S	35	1	24	22	15		15.4	13.8	0.8	0	316	125.5	14.1	12.3	0.9	0	271	67.6	16.7	14.9	1.1	0	215	120.2
Sepsis	Pulmonary	67	60	0	80	Male	Any White	Y	1	DNS	40	1	16	15			12.1	11.47	0.32	0	109	145	21.93	18.9	1.51	0	110	255	6.98	4.64	1.34	0.01	115	94	12.44	8.51	2.48	0.02	267	33
Sepsis	Pullmonary	68	61	0	68	Female	Any White	N			34	1	16	11			3.9	3.4	0.3	0	227	63
Sepsis	Abdominal	69	62	0	44	Male	Any White	N			32	1		16	12	6	7.6	6.2	0.8	0	251	59
Sepsis	Pulmonary	71	21	0	67	Female	White British	Y	1,2,5	S	24	1	19	19	16		12.9	10.5	1	0	190	110.1	7.6	5.6	1	0	160	249
Sepsis	Abdominal	72	22	0	72	Female	Asian-Indian	Y	1,2,5,D	S	29	1	22	21	17		20.5	18.5	1.3	0.1	312	76	15.3	10.3	3.3	0.1	300	30							15.3	10.3	3.3	0.1	300	30
Sepsis	Abdominal	73	23	0	82	Female	White British	Y	1,2,5,D	S	21	1	16	15			9.2	8.2	0.6	0	37	346	10.5	8.7	1.2	0	36	295	13.5	10.1	2.2	0.1	131	75
Sepsis	Pulmonary	75	26	0	75	Male	White British	N			20	1	16	14	11		16.5	15	1	0	263	224	15.3	13.5	1.2	0	234	201	10.7	8.1	1	0	209	81
Sepsis	Abdominal	79	130	0	72	Male	Any White	Y	1,2	DNS		1	17	21			7.9	6.7	0.5	0	190	306
Sepsis	Pulmonary	80	63	0	47	Male	Any white	Y	5	S	26	1	14	16	11
Sepsis	Pulmonary	81	64	0	78	Male	Any white	N			48	1	10	11	13		12.5	11.8	0.3	0	133	188
Sepsis	Abdominal	82	65	0	76	Female	Any White	Y	1,2,5	DNS	41	1	18	18	11		17.2	16.3	0.4	0	164	336	19.7	18.5	0.6	0	148	307	9.3	6.9	1.4	0	188	102	9.3	6.9	1.4	0	188	102
Sepsis	Abdominal	84	67	0	54	Male	Any White	Y	1,D	S	33	1	15			9	0.6	0.5	0.1	0	101	216	4.2	3.8	0.4	0	33	197	3.9	3.1	0.5	0.1	87	226	17.2	12.2	2.7	0.2	411	9
Sepsis	Pulmonary	85	68	0	65	Female	Any White	Y	1,2,5,D	S	38	1	17	18	18	8	13.3	11.5	0.7	0	159	144	11.2	9	1.1	0.1	156		10.8	6.4	2	0.1	188		12.6	8.4	2	0.1	282	111
Sepsis	Abdominal	86	69	0	83	Female	Any White	Y	1,2	S	31	1	17	17			13.7	11.1	1.3	0.1	116	354	7.7	5.2	1.4	0.1	120	237	11.9	9.1	1.2	0	284	207	11.9	9.1	1.2	0	284	207
Sepsis	Pulmonary	87	70	0	30	Male	Any White	Y	1,2,5	S	41	1	24	26	23		17.9	15.1	1.4	0.1	206	139	12.1	8.7	1.8	0.1	249	72
Sepsis	Pulmonary	88	71	0	61	Female	Any white	Y	1,2,5	S	36	1	16	15	11		8.5	7.3	0.6	0	31	156	8.7	7.3	0.5	0	25	121	7.7	5.4	1	0.1	149	83	9.8	5.8	2.2	0.1	563	63
Sepsis	Pulmonary	89	72	0	21	Male	Any white	Y	1,2	S	26	1	18	16			13.7	12.4	0.4	0	183	0	9.8	7.9	1.2	0	148	44
Sepsis	Pulmonary	90	151	0	47	Female	Any other white background	Y	1,2	S	17	1	9	9		9	9.2	7.6	0.5	0	115	413	5.4	4.2	0.5	0	88	525.8	10.2	8	1.2	0	106	168.8
Sepsis	Abdominal	91	152	0	72	Male	White British	Y	1,2,5	S	36	1	24	21	12		16.5	15.9	0.5	0	328	298.2	16.8	15.9	0.5	0	414	270	12.8	11.4	0.6	0.1	426	44.6	18.9	16.3	1.5	0	412	72.5
Sepsis	Abdominal	92	153	0				Y	1,2	S		1					19.2	16.4	1.7	0	242	319	14.9	12.2	2	0.1	196	387							13	11.3	1.2	0	165	247
Sepsis	Pulmonary	93	154	0	50	Male	British	Y	1,2,5,D	S	32	1	24	21	17	6	42.1	36.2	2.1		234	243	35.9	30.7	2.8		123	364	15.8	13.6	1.4	0	83	28
Sepsis	Pulmonary	94	155	0	77	Male	White British	Y	1,5,D	S	32	1	14	13	8	7	2.9	2.5	0.4	0	55	318.9	12.6	10.6	1.4	0	24	278.6
Sepsis	Abdominal	95	156	0	35	Female	Any other white background	Y	1,2,5	S	17	1	16	13	7	7	28.9	26.8	0.9	0	270	30.3
Sepsis	Pulmonary	96	157	0	20	Female	White British	Y	1,2	S	14	1	9	7			10.3	8.8	1	0	276	8
Sepsis	Abdominal	97	158	0	66	Male	White British	Y	1,2,5,D	S	28	1	24	18	20	7	14.67	12.48	0.42	0	115	114
Sepsis	Pulmonary	101	74	0	49	Male	Any White	N				1	15				16.9	15.2	0.9	0	58	106	10.1	8.7	0.7	0	37	70
Sepsis	Abdominal	103	77	0	65	Female	Any White	Y	1,2,5	S	31	1	18	17	15		18.26	16.13	0.36	0.01	20	202	15.59	13.92	0.53	0.02	52	157	16.23	11.47	2.08	0.16	60	216
Sepsis	Pulmonary	104	76	0	67	Male	Any White	Y	1,2,5,D	S	31	1	17	18	15	10	16.38	15.2	0.38	0	243	125	18.03	16.06	0.81	0.02	190	190	14.43	12.35	1.18	0	31	31
Sepsis	Abdominal	105	78	0	74	Female	Any White	Y	1,2,5,D	S	31	1	18	15		9	17.06	15.58	0.44	0.02	275	60	16.87	15.17	0.57	0.02	222	133	7.05	5.08	0.87	0.03	223	135	16.25	13.05	1.61	0.03	261	128
Sepsis	Abdominal	106	79	0	77	Female	Any White	N			42	1	19	19	15		19.3	16.7	0.8	0.2	302	104	18.7	15.9	1	0.1	321	113
Sepsis	Pulmonary	107	80	0	69	Male	Any White	Y	1,2	S	35	1	19	17			33.53	29.81	1.78	0.1	429	293	25.93	21.62	1.97	0.05	419	280	19.94	15.09	2.57	0.06	663	114	16.7	12.27	2.3	0.08	709	147
Sepsis	Pulmonary	108	81	0	69	Female	Any White	Y	1	S	43	1	19				13.69	12.77	0.31	0.01	173	273
Sepsis	Pulmonary	109	82	0	43	Male	Any white	Y	1	S	23	1	13				25.48	22.22	1.58	0.05	153	189	31.69	28.62	1.69	0.1	150	189	31.36	18.98			231	152
Sepsis	Pulmonary	110	29	0	58	Male	Unknown	Y	1	DNS	36	1	19				27.5	24.7	1.1	0	390	212	18.7	17.6	0.7	0	295	256
Sepsis	Abdominal	111	30	0	53	Male	White British	Y	1,2,5	S	28	1	20	23			14.79	12.81	1.2	0.01	382	272	8.66	7.2	0.9	0	197	324	7.69	4.84	1.96	0.02	278	110
Sepsis	Pulmonary	112	31	0	67	Female	White British	Y	1,2,5	S	21	1	17	9			4.3	4	0.1	0	117	351	11.3	10.6	0.3	0	67	435	14	11.7	0.6	0	84	129	10.1	7.4	1.1	0.1	492	74
Sepsis	Pulmonary	113	32	0	78	Male	White british	Y	1,2,5,D	S	43	1	20	16	11		7.6	5.3	0.9	0	78	189	6.8	4.9	0.9	0	80	128							6.8	4.9	0.9	0	80	128
Sepsis	Abdominal	114	33	0	63	Male	mixed race	Y	1,2,5	S	12	1	10	9	11		13.5	10.1	2	0.1	424								11.6	7.9	1.9	0.1	317	105	6.7	4	1.3	0.1	323	10
Sepsis	Pulmonary	115	34	0	78	Male	White British	Y	1	DNS	15	1	21				25.2	23.6	0.5	0	184	162	15.9	14.6	0.6	0	188	116	12.1	10.5	0.7	0	192	163	7.5	5.9	1	0	246	48
Sepsis	Abdominal	116	35	0	67	Male	White British	Y	1,5	DNS	25	1	14				26.8	25.1	0.6	0	327	380	19.2	17.7	0.5	0	262	441	18.7	16.3	1.1	0.1	326	212	18.9	16.5	1.7	0	358	17
Sepsis	Abdominal	117	36	0	72	Male	White British	Y	1,2	S	17	1	11				20.3	18.2	1.3	0.1	47	200	18.7	16.3	1.7	0.1	25	128
Sepsis	Pulmonary	120	161	0	47	Male	White British	Y	1,2,5,D	S	32	1	21	20	16	11	1.6	1.3	0.2	0	175	259	10.3	9.6	0.4	0	35	386	4.5	3.9	0.5	0	10	289
Sepsis	Abdominal	121	162	0	72	Male	White British	Y	1,2	S	15	1	7	9		9	6.1	5.3	0.3	0	285	178	3.9	3.2	0.3	0	272	166	12.5	10.5	0.8	0	259	176	10	8.6	0.7	0	508	48
Sepsis	Pulmonary	122	163	0	39	Male	Any other white background	Y	1,5,D	S	18	1	13	12	18	8	6.8	5.3	0.6	0.1	146	74	6.2	4	1	0.1	125	34	7.3	5.2	1.1	0	142	6	10.7	8.6	1.1	0	237	3
Sepsis	Pulmonary	123	164	0	72	Male	White British	Y	1,2	DNS	20	1	17	16			23.9	20.5	1.7	0.1	146	447	20.9	186	1.5	0	123	583	43.2	40	2.5	0	91	291
Sepsis	Abdominal	124	165	0	77	Female	White British	Y	1,2,5	DNS	19	1	20	21	19		7.8	6.9	0.5	0	116		6.2	5.3	0.6	0	98	162	8.6	6.6	1.2	0	153		8.6	6.6	1.2	0	153
Sepsis	Abdominal	125	166	0	62	Male	White British	Y	1,5,D	S	17	1	10	9	10	6	17.5	12.1	3.8	0.1	447	23	12.1	9	1.8	0	405	16	16.8	12.2	2.9	0	443	4	16.8	12.2	2.9	0	443	4
Sepsis	Pulmonary	126	167	0	63	Male	White British	Y	1,5,D	S	12	1	13	11	10	9	42.7	40.5	0.6	0	125	139	43.7	39.9	2.1	0	92	177	13.5	8.8	3.3	0	144	12	13.5	8.8	3.3	0	144	12
Sepsis	Pulmonary	127	168	0	74	Female	White british	Y	1,2,5,D	S	15	1	9	8	7	7	20.2	18	0.7	0	140	51	15.9	13.4	1.1	0.1	127	110	12.2	9.7	1.2	0	97	55	13	10.4	1.5	0.1	96	32
Sepsis	Pulmonary	128	169	0	64	Female	Asian	Y	1,5,D	S	16	1	12	7	7	7	24.1	21.9	0.9	0.2	446	203	22.1	19.7	1.2	0.1	460	164							22.1	19.7	1.2	0.1	460	164
Sepsis	Pulmonary	129	170	0	76	Female	White British	Y	1,2,5,D	DNS	29	1	17	16	13	10	15.1	14.4	0.3	0	226	240	10.3	9.8	0.3	0	191	224.5							5.7	5.1	0.4	0	118	121.7
Sepsis	Abdominal	130	171	0	64	Female	White British	Y	1,2	S	16	1	10	9		9	21.7	19.9	1.2	0	121	285	24	22.3	1.2	0.1	119	257	13.5	10.9	1.5	0	141	34	9.4	7	1.6		274	35
Sepsis	Pulmonary	131	172	0	45	Male	asian	Y	1,2,5,D	S	29	1	18	17	13	6	19.5	18.3	0.4	0	273	269	19.6	18.5	0.4	0	182	211	19.5	169	0.7	0	258	178	27.4	26.7	0.1	0.1	691	179
Sepsis	Pulmonary	133	174	0	64	Female	british	Y	1,5,D	S	30	1	18	18	17	7	16.4	14	0.9	0	216	326
Sepsis	Pulmonary	134	175	0	83	Male	White British	Y	1,D	S	13	1	12				9.1	8.3	0.4	0.1	268	298	17.5	16.5	0.6	0.1	205	291	9.8	6.7	1.2	0.1	252		7.5	5.1	1.2	0.1	1101	56
Sepsis	Pulmonary	136	177	0	61	Male	White British	Y	1,5,D	DNS	15	1	12	14	8	10	19.7	17.6	0.6	0	299	12.6	20.1	18.4	0.4	0	221	51.9	10.5	8.2	1.2	0	200	115	8.6	6.4	1.1	0	228	45.6
Sepsis	Abdominal	137	122	0	81	Female	Any White	Y	1	DNS	44	1	17				9	7.9	0.8	0	299	361.1	14.6	13.3	0.8	0	219	249.9	14.2	11.8	1.4	0	283	19.6
Sepsis	Pulmonary	138	178	0	72	Male	White British	Y	1,2,5	S	23	1	19	18	14	7	18.7	17.8	0.4	0	292	242
Sepsis	Abdominal	139	179	0	73	Male	White British	N			20	0	10	13	9	8	1.8	1.4	0.4	0	190	52	23.4	22.4	0.4	0	148	425
Sepsis	Abdominal	140	87	0	61	Female	Any white	Y	1,2,5	S	46	1	15	17	20		10.2	8.4	0.9	0	134	117	10.4	8.7	1	0	80	113	12.2	9	1.4	0	68	60	5.5	3.4	1	0.1	242	30
Sepsis	Abdominal	141	85	0	80	Female	Any White	Y	1,2	DNS	35	1	13	12			14.4	10.7	2.7	0	201	200.9	17	16.4	0.3	0	207	471.9	13.1	11.8	0.7	0	323	53.9	15.4	13.4	1.3	0	332	23.9
Sepsis	Pulmonary	142	83	0	80	Female	any white	Y	1	S	41	1	15				46.7	40.2	4.2	0	217	206	22.8	18.6	2.5	0.1	147	158	6.2	3.9	1.5	0	112	31	5.2	2.9	1.4	0	126	15
Sepsis	Abdominal	143	84	0	72		Any White	Y	1,5	S		1	19		14		19.4	17.9	0.7	0	132	473	18.9	16.6	1	0.1	91	461	19.3	15.1	2.2	0.1	190	219
Sepsis	Pulmonary	144	86	0	85	Female	Any White	Y	1,2,5,D	S	44	1	13	17	17	11	16.8	14.9	1.1	0	316	25	19.5	17.5	1.1	0.1	304	44
Sepsis	Pulmonary	145	88	0	47	Male	Any White	Y	1	DNS	31	1	16				22.4	20.6	0.8	0	414	286.6													5.2	4.3	0.5	0	221	272.5
Sepsis	Pulmonary	147	89	0	68	Male	Any White	Y	1,2,5	S	44	1	19	16	14		10.1	9.1	0.5	0	209	410.2
Sepsis	Abdominal	148	91	0	59	Male	any white	Y	1,2,5	S	33	1	15	21	13		16.2	15.1	0.8	0	194	402.8							12.8	10.5	1.8	0	182	109
Sepsis	Pulmonary	149	90	0	28	Female	Any White	Y	1,2,5	S	28	1	13	16	11		13.3	11.1	0.4	0	169	12	14.9	12.7	0.6	0	126	20	10.5	9.2	0.2	0	123	48	8.1	6.8	0.6	0	140	10
Sepsis	Pulmonary	151	93	0	87	Female	Any White	Y	1,2	DNS	31	1	18	18			29.4	28.1	0.4	0	219	30	13	12	0.5	0	88	266.2	11.3	10.2	0.4	0	65	127.4
Sepsis	Pulmonary	152	94	0	74	Male	Any White	Y	1,2,5	S	35	1	18	18	16		6.7	6	0.3	0	203	281
Sepsis	Pulmonary	153	95	0	67	Female		Y	1,2,5	DNS	41	0	18	20	16		10.14	7.9	1.5	0.01	178	275	8.48	7.25	0.79	0.01	208	215	14.6	10	2.94	0.03	326	105	13.28	7.78	4.02	0.01	317	42
Sepsis	Abdominal	154	96	0	85	Male	Any White	Y	1,2	S	47	1	18	17			13.4	11.9	0.9	0	380	82	17.4	16.4	0.3	0	330	99	19.2	18.4	0.2	0	194	66
Sepsis	Pulmonary	155	97	0	69	Male	Any White	Y	1,2,5	S	33	1	18	17	14		29	26.2	1.3	0	16	197	19.9	17	1.5	0.1	27	201	16	11.5	2.6	0.1	124	69
Sepsis	Pulmonary	157	99	0	70	Female	Any White	Y	1,2,5,D	S	32	1	23	18	15		6	5.4	0.5	0	94	278	10.8	9.6	0.6	0	66	274	28	24.2	1.8	0.1	176	245
Sepsis	Pulmonary	158	100	0	65	Female	Any White	Y	1,2,5	S	40	1	14	14	13		12.6	10.5	1	0.1	268	107	12.8	11.6	0.3	0	253	164
Sepsis	Pulmonary	159	102	0	83	Female	Any white	Y	1,2,5	DNS	35	1	17	16	17		0.6	0.37	0.21	0	149	170
Sepsis	Pulmonary	181	180	0	19	Female	Asian	Y	1,2	S	18	1	15	14		9	18.7	14.4	2.6	0	276	123	15.5	12.5	1.6	0	271	159	9.8	7.3	1.3	0	253	153
Sepsis	Pulmonary	182	181	0	55	Female	White British	N			18	1	19	17	17		12.7	11.4	0.8	0	133	295	8.6	7.1	0.9	0	123	138
Sepsis	Pulmonary	183	182	0	64	Male	White British	Y	1,2,D	S	15	1	19	19	16	6	21.5	20	1	0.1	495	345	15.8	11.4	2	0.1	527	216	21.1	18.2	1.4	0.1	521	116
Sepsis	Abdominal	184	183	0	73	Female	white	Y	1,2,5	S	21	1	18	18	10	8	34.1	32.3	0.5	0.1	339	341	26.9	24.7	1	0.1	245	252
Sepsis	pulmonary	185	184	0	86	Female	White British	N				1	11				0.4	0.2	0.2	0	100	24
Sepsis	Pulmonary	186	185	0	68	Female	White British	N			15	1	16	11	12	7	20.7	18.1	0.4	0.1	468	341	19.7	16.5	0.5	0.1	414	219
Sepsis	Pulmonary	187	186	0	67	Male	White British	Y	1,2,D	S	29	1	19	22	17		22.3	19.3	1.2	0.1	350	198	11.6	9	12	0.1	299	295	7.9	6.6	0.6	0	287	154
Sepsis	Pulmonary	191	104	0	48	Male	Any White	Y	1,2,5	S	38	1	20	20	15		22.4	20.4	0.5	0	93	81	20.4	18.9	0.2	0	101	68	16.5	14.6	0.6	0	83	51
Sepsis	Pulmonary	193	123	0	87	Male	Any White	Y	1,2,5	S		1	21	20	17		15.6	13.3	0.8	0.1	366	175	16.3	14.4	0.4	0	362	62	21.4	19.2	0.9	0.1	373	87
Sepsis	Abdominal	194	125	0	59	Male	Any white	Y	1,2,D	S		1	14	13		11	26.9	24.4	1.1	0.1	389	349	13.9	11.4	1.3	0	289	320	13.8	10.2	2.1	0	278	307
Sepsis	Pulmonary	195	126	0	80	Female	Any white	Y	1,2	DNS		1	20	17			14	11	1.4	0.1	217	155	12.4	9.1	1.6	0.1	267	167	9.7	7.9	0.9	0	279	180
Sepsis	Abdominal	197	127	0	65	Female	Any white	Y	1,2,5	S		1	20	22	20		7.6	5.5	1.6	0	215	91	7.1	3.7	2.9	0	227	71							6.1	3.1	2.1	0	351	36
Sepsis	Abdominal	198	128	0	80	Female	Any white	Y	1,2	DNS		1	21	19			18.1	16.4	1	0.1	114	156	10.7	9.3	0.6	0	107	191	6.2	4.9	0.6	0	105	184	6.5	5	0.7	0.1	275	71
Sepsis	Abdominal	199	129	0	69	Male		Y	1,2	S		1	17	18			37.1	36.2	0.5	0	205	218	40.3	39.1	0.6	0	251	107	25.9	24	1.1	0	367	153
Sepsis	Pulmonary	200	105	0	59	Male	Any White	Y	1,2,5	S	36	1	16	17	12		15.6	14	0.4	0.2	413	245	9.2	7.9	0.4	0	366	127	9.1	7.6	0.3	0.1	373		8.2	6.2	1.1	0.1	387	8
Sepsis	Pulmonary	201	108	0	59	Female	Any White	Y	1,5	S	32	1	16		16		29.9	28.3	0.8	0	378	347	21.3	19.7	0.7	0	259	288	14.1	11.1	1.4	0	177	92	15.4	12.5	1.2	0.1	308	182
Sepsis	Abdominal	202	106	0	54	Female	any white	Y	1	S	30	1	14				15	13.5	0.3	0	303	163	11.3	10.6	0.2	0	229	422
Sepsis	Pulmonary	203	107	0	49	Male	Any white	Y	1,2,5	S	28	1	17	18	12		13.4	12.4	0.6	0	172	131	19.3	18.3	0.6	0	186	64	11.3	9.9	0.9	0	178	18	11.2	8.1	2.1	0.1	323	75
Sepsis	Pulmonary	204	109	0	77	Male	Any White	Y	1,5	S	42	1	17	16	11		15.4	14.8	0.2	0	97	542	18.7	17.9	0.3	0.1	75		21.6	19.6	1.4	0.1	137
Sepsis	Abdominal	205	111	0	84	Female	Any White	Y	1	DNS	41	1	17				18.9	18.1	0.4	0	239	380	24.5	22.8	0.5	0	178	391	40.9	37.9	1	0	141
Sepsis	Abdominal	206	112	0	69	Male	Any white	Y	1	DNS	41	1	17				55	4.8	0.4	0	40	199	13.2	12.2	0.6	0	73	75	8.4	6.8	1	0	128	170
Sepsis	Pulmonary	207	110	0	53	Female	Any White	N			32	1	16	16	14		13.4	9.9	0.9	0.1	198	148	6.9	5.8	0.8	0	191	75	5.5	4.3	0.7	0	302	181
Sepsis	Pulmonary	208	113	0	80	Male	Any White	Y	1	DNS	44	1	19				9.5	8.5	0.9	0	173	322	5	3.5	0.8	0	197	296	6.1	3.7	1.9	0	18	98	8.2	4.4	3.1	0.1	417	11
Sepsis	Abdominal	209	117	0	59	Female	Any White	Y	1,2	DNS	40	1	24	26			13.9	12.4	0.5	0	209	283
Sepsis	Pulmonary	210	118	0	67	Female	Any white	Y	1,2	S		1	14	14			3.7	3.2	0.3	0	147	465	14	13	0.6	0.1	138	418	26.6	24.8	1	0	178	174
Sepsis	Abdominal	211	114	0	75	Male	Any White	Y	1,2	S	39	1	22	19			17.4	16.5	0.6	0	130	326	14	12.9	0.7	0	76	343	22.1	18.9	1	0	117	154
Sepsis	Abdominal	212	115	0	62	Female	Any White	Y	1,2	S	32	1	14	13			4.7	3.6	0.7	0	169	49	7.8	6.4	0.8	0	136	323							7.9	6.4	0.8	0	168	346
Sepsis	Abdominal	213	116	0	50	Female	Any White	N			37	1	19				12.2	10.5	0.7	0	227	151	9.9	8.2	1.1	0	153	265							6.2	4.7	0.7	0	104	84
Sepsis	Abdominal	215	119	0	88	Female	Any White	Y	1,2	S	31	1	15	14			15.7	14.7	0.4	0	195	104	9.6	7.7	1.4	0	179	163
Sepsis	Pulmonary	216	124	0	50	Female	Any White	Y	1,2,5	S		1	14	14	15		34.2	29.4	2.1	0	334	51	24.6	22.1	1.1	0	161	83	15.1	13.5	0.6	0	105	19
Sepsis	Abdominal	219	121	0	61	Male	Any White	Y	1,2,D	S	42	1	12	12		11	15.1	12.3	2.2	0	256	94	12.9	11.7	0.8	0	192	109

## Sheet: Table S1.4
Sample Type/ Disease	SampleSpecific ID	Sex	Age
Control	161	F	62
Control	162	F	31
Control	163	F	43
Control	165	f	44
Control	170	F	62
Control	171	F	42
Control	172	F	31
Control	173	F	43
Control	175	F	49
Control	176	F	53
Control	177	F	23
Control	178	F	32
Control	179	F	42
Control	226	F	53
Control	227	F	49
Control	229	F	36
Control	230	F	33
Control	231	F	33
Control	233	F	33
Control	234	F	43
Control	235	F	40
Control	160	M	42
Control	174	M	42
Control	224	M	52
Control	225	M	44
Control	228	M	40
Control	232	M	23
Control	236	M	42
Control	237	M	24
Control	238	M	52

## Sheet: Table S1.5
Test for normal distribution (Sepsis)	APACHEIIScoreonadmission	SeveresepsisasdefinedbytheSOFAscoreonDay1	SOFA Overall Score Day 1	SOFA Overall Score Day 2	SOFA Overall Score Day 5	SOFA Overall Score Day Discharge	White Blood Cells D1	Neutrophils D1	Lymphocytes D1	Basophils D1	Platelets D1	CRP D1	White Blood Cells D2	Neutrophils D2	Lymphocytes D2	Basophils D2	Platelets D2	CRP D2	White Blood Cells D5	Neutrophils D5	Lymphocytes D5	Basophils D5	Platelets D5	CRP D5	White Blood Cells Discharge	Neutrophils Discharge	Lymphocytes Discharge	Basophils Discharge	Platelets Discharge	CRP D5
Kolmogorov-Smirnov test
KS distance	0.09094	0.5332	0.1033	0.113	0.07288	0.1599	0.1094	0.1007	0.207	0.3824	0.08983	0.05276	0.09005	0.262	0.2481	0.4162	0.1145	0.06749	0.149	0.267	0.1605	0.3667	0.09552	0.08109	0.1432	0.1598	0.1542	0.2801	0.1399	0.1935
P value	0.0103	<0.0001	0.0009	0.001	>0.1000	0.0074	0.0002	0.001	<0.0001	<0.0001	0.0058	>0.1000	0.0167	<0.0001	<0.0001	<0.0001	0.0005	>0.1000	<0.0001	<0.0001	<0.0001	<0.0001	0.0376	>0.1000	0.0042	0.0007	0.0013	<0.0001	0.0058	<0.0001
Passed normality test (alpha=0.05)?	No	No	No	No	Yes	No	No	No	No	No	No	Yes	No	No	No	No	No	Yes	No	No	No	No	No	Yes	No	No	No	No	No	No
P value summary	*	****	***	**	ns	**	***	***	****	****	**	ns	*	****	****	****	***	ns	****	****	****	****	*	ns	**	***	**	****	**	****
Number of values	130	143	141	115	82	43	146	146	146	145	146	143	122	121	121	120	122	120	92	92	91	91	92	85	59	59	59	58	59	58
Test for normal distribution (SIRS)	APACHEIIScoreonadmission	SeveresepsisasdefinedbytheSOFAscoreonDay1	SOFA Overall Score Day 1	SOFA Overall Score Day 2	SOFA Overall Score Day 5	SOFA Overall Score Day Discharge	White Blood Cells D1	Neutrophils D1	Lymphocytes D1	Basophils D1	Platelets D1	CRP D1	White Blood Cells D2	Neutrophils D2	Lymphocytes D2	Basophils D2	Platelets D2	CRP D2	White Blood Cells D5	Neutrophils D5	Lymphocytes D5	Basophils D5	Platelets D5	CRP D5	White Blood Cells Discharge	Neutrophils Discharge	Lymphocytes Discharge	Basophils Discharge	Platelets Discharge	CRP Discharge
Kolmogorov-Smirnov test
KS distance	0.07962	0.5375	0.1143	0.1746	0.16	0.2114	0.1185	0.1197	0.2596	0.3532	0.08861	0.1721	0.1238	0.1163	0.1657	0.3211	0.1288	0.09476	0.09046	0.1243	0.1964	0.4274	0.155	0.2439	0.08607	0.1031	0.2432	0.3023	0.1561	0.1849
P value	>0.1000	<0.0001	>0.1000	0.0085	>0.1000	0.07	>0.1000	>0.1000	<0.0001	<0.0001	>0.1000	0.0036	>0.1000	>0.1000	0.0161	<0.0001	>0.1000	>0.1000	>0.1000	>0.1000	0.0998	<0.0001	>0.1000	0.0167	>0.1000	>0.1000	0.003	<0.0001	>0.1000	0.0868
Passed normality test (alpha=0.05)?	Yes	No	Yes	No	Yes	Yes	Yes	Yes	No	No	Yes	No	Yes	Yes	No	No	Yes	Yes	Yes	Yes	Yes	No	Yes	No	Yes	Yes	No	No	Yes	Yes
P value summary	ns	****	ns	**	ns	ns	ns	ns	****	****	ns	**	ns	ns	*	****	ns	ns	ns	ns	ns	****	ns	*	ns	ns	**	****	ns	ns
Number of values	40	42	42	35	17	15	41	41	41	41	41	41	35	35	35	35	35	35	16	16	16	16	16	15	20	20	20	20	20	19

## Sheet: Table S1.6
SIRS vs Sepsis_Mann-Whitney
Table Analyzed	Apache II Score D1	SOFA SCORE D1	SOFA SCORE D2	SOFA SCORE D5	SOFA SCORE DISCHARGE	WBCS D1	Neutrophils D1	Lymphocytes D1	Basophils D1	Platelets D1	CRP D1	WBC D2	Neutrophils D2	Lymphocytes D2	Basophils D2	Platelets D2	CRP DAY 2	WBC D5	Neutrophils D5	Lymphocytes D5	Basophils D5	Platelets D5	CRP D5	WBC Discharge	Neutrophils Discharge	Lymphocytes Discharge	Basophils Discharge	Platelets Discharge	CRP Discharge
Column B	SEPSIS	SEPSIS	SEPSIS	SEPSIS	SEPSIS	SEPSIS	SEPSIS	SEPSIS	SEPSIS	SEPSIS	SEPSIS	SEPSIS	SEPSIS	SEPSIS	SEPSIS	SEPSIS	SEPSIS	SEPSIS	SEPSIS	SEPSIS	SEPSIS	SEPSIS	SEPSIS	SEPSIS	SEPSIS	SEPSIS	SEPSIS	SEPSIS	SEPSIS
vs.	vs.	vs.	vs.	vs.	vs.	vs.	vs.	vs.	vs.	vs.	vs.	vs.	vs.	vs.	vs.	vs.	vs.	vs.	vs.	vs.	vs.	vs.	vs.	vs.	vs.	vs.	vs.	vs.	vs.
Column A	SIRS	SIRS	SIRS	SIRS	SIRS	SIRS	SIRS	SIRS	SIRS	SIRS	SIRS	SIRS	SIRS	SIRS	SIRS	SIRS	SIRS	SIRS	SIRS	SIRS	SIRS	SIRS	SIRS	SIRS	SIRS	SIRS	SIRS	SIRS	SIRS
Mann Whitney test
P value	0.6229	0.3452	0.9814	0.3608	0.066	0.4394	0.3851	0.0002	0.0436	0.4513	<0.0001	0.003	0.0016	0.595	0.4834	0.3315	<0.0001	0.0274	0.0475	0.0383	0.3777	0.952	0.163	0.9976	0.6971	0.7101	0.9772	0.067	0.0715
Exact or approximate P value?	Exact	Exact	Exact	Exact	Exact	Exact	Exact	Exact	Exact	Exact	Exact	Exact	Exact	Exact	Exact	Exact	Exact	Exact	Exact	Exact	Exact	Exact	Exact	Exact	Exact	Exact	Exact	Exact	Exact
P value summary	ns	ns	ns	ns	ns	ns	ns	***	*	ns	****	**	**	ns	ns	ns	****	*	*	*	ns	ns	ns	ns	ns	ns	ns	ns	ns
Significantly different (P < 0.05)?	No	No	No	No	No	No	No	Yes	Yes	No	Yes	Yes	Yes	No	No	No	Yes	Yes	Yes	Yes	No	No	No	No	No	No	No	No	No
One- or two-tailed P value?	Two-tailed	Two-tailed	Two-tailed	Two-tailed	Two-tailed	Two-tailed	Two-tailed	Two-tailed	Two-tailed	Two-tailed	Two-tailed	Two-tailed	Two-tailed	Two-tailed	Two-tailed	Two-tailed	Two-tailed	Two-tailed	Two-tailed	Two-tailed	Two-tailed	Two-tailed	Two-tailed	Two-tailed	Two-tailed	Two-tailed	Two-tailed	Two-tailed	Two-tailed
Sum of ranks in column A,B	3286 , 11250	3580 , 13256	2637 , 8688	751 , 4199	1166 , 545	3540 , 13296	3512 , 13325	4857 , 11980	4260 , 12393	3546 , 13290	1347 , 14943	2018 , 9763	1963 , 9665	2800 , 8829	2796 , 8680	2471 , 9311	1786 , 9691	596.5 , 4864	620.5 , 4840	605.5 , 4751	746.5 , 4610	833 , 4627	866.5 , 3790	760.5 , 2090	793 , 2057	728.5 , 2122	752.5 , 2023	607 , 2243	846.5 , 1855
Mann-Whitney U	2466	2677	2007	598	220	2679	2651	1827	2382	2685	486	1388	1333	1926	1894	1841	1156	460.5	484.5	469.5	610.5	697	468.5	549.5	517	518.5	537.5	397	369.5
Difference between medians
Median of column A	30.00, n=40	16.00, n=42	17.00, n=35	14.00, n=17	9.000, n=15	14.85, n=41	12.43, n=41	1.000, n=41	0.01000, n=41	191.0, n=41	26.00, n=41	10.40, n=35	8.500, n=35	0.9000, n=35	0.000, n=35	143.0, n=35	131.0, n=35	9.775, n=16	7.615, n=16	0.8000, n=16	0.000, n=16	172.5, n=16	138.0, n=15	10.71, n=20	8.620, n=20	1.270, n=20	0.01000, n=20	211.5, n=20	80.00, n=19
Median of column B	31.00, n=130	17.00, n=141	17.00, n=115	14.00, n=82	8.000, n=43	16, n=142	13.37, n=142	0.7000, n=142	0.000, n=141	205.5, n=142	202.0, n=139	14.90, n=118	12.50, n=117	0.7900, n=117	0.000, n=116	171.5, n=118	208.2, n=116	12.65, n=88	10.15, n=88	1.100, n=87	0.000, n=87	178.0, n=88	105.0, n=81	10.10, n=55	7.600, n=55	1.300, n=55	0.005000, n=54	275.0, n=55	51.00, n=54
Difference: Actual	1	1	0	0	1	0.75	0.94	-0.3	-0.01	14.5	176	4.5	4	-0.11	0	28.5	77.15	2.875	2.535	0.3	0	5.5	-33	-0.61	-1.02	0.03	-0.005	63.5	-29
Difference: Hodges-Lehmann	1	1	0	1	2	1.11	1.145	-0.3	0	13	169	3.45	3.5	-0.04	0	17	80	2.86	2.415	0.24	0	1.5	-30	0	-0.385	0.1	0	58.5	-30

## Sheet: Table S1.7
SIRS vs Abdominal Sepsis Mann-Whitney
Table Analyzed	SOFA SCORE D1	SOFA SCORE D2	SOFA SCORE D5	SOFA SCORE DISCHARGE	WBCS D1	Neutrophils D1	Lymphocytes D1	Basophils D1	Platelets D1	CRP D1	WBC D2	NEUTROPHILS D2	Lymphocytes D2	Basophils D2	Platelets D2	CRP DAY 2	WBC D5	Neutrophils D5	Lymphocytes D5	Basophils D5	Platelets D5	CRP D5	WBC Discharge	Neutrophils Discharge	Lymphocytes Discharge	Basophils Discharge	Platelets Discharge	CRP Discharge
Column B	SEPSIS	SEPSIS	SEPSIS	SEPSIS	SEPSIS	SEPSIS	SEPSIS	SEPSIS	SEPSIS	SEPSIS	SEPSIS	SEPSIS	SEPSIS	SEPSIS	SEPSIS	SEPSIS	SEPSIS	SEPSIS	SEPSIS	SEPSIS	SEPSIS	SEPSIS	SEPSIS	SEPSIS	SEPSIS	SEPSIS	SEPSIS	SEPSIS
vs.	vs.	vs.	vs.	vs.	vs.	vs.	vs.	vs.	vs.	vs.	vs.	vs.	vs.	vs.	vs.	vs.	vs.	vs.	vs.	vs.	vs.	vs.	vs.	vs.	vs.	vs.	vs.	vs.
Column A	SIRS	SIRS	SIRS	SIRS	SIRS	SIRS	SIRS	SIRS	SIRS	SIRS	SIRS	SIRS	SIRS	SIRS	SIRS	SIRS	SIRS	SIRS	SIRS	SIRS	SIRS	SIRS	SIRS	SIRS	SIRS	SIRS	SIRS	SIRS
Mann Whitney test
P value	0.5853	0.4386	0.6373	0.0741	0.4737	0.5863	0.0097	0.0687	0.5114	<0.0001	0.0237	0.0137	0.5305	0.1869	0.229	0.0001	0.0151	0.0333	0.0098	0.1723	0.4127	0.433	0.5831	0.5754	0.4931	0.3944	0.0727	0.1707
Exact or approximate P value?	Exact	Exact	Exact	Exact	Exact	Exact	Exact	Exact	Exact	Exact	Exact	Exact	Exact	Exact	Exact	Exact	Exact	Exact	Exact	Exact	Exact	Exact	Exact	Exact	Exact	Exact	Exact	Exact
P value summary	ns	ns	ns	ns	ns	ns	**	ns	ns	****	*	*	ns	ns	ns	***	*	*	**	ns	ns	ns	ns	ns	ns	ns	ns	ns
Significantly different (P < 0.05)?	No	No	No	No	No	No	Yes	No	No	Yes	Yes	Yes	No	No	No	Yes	Yes	Yes	Yes	No	No	No	No	No	No	No	No	No
One- or two-tailed P value?	Two-tailed	Two-tailed	Two-tailed	Two-tailed	Two-tailed	Two-tailed	Two-tailed	Two-tailed	Two-tailed	Two-tailed	Two-tailed	Two-tailed	Two-tailed	Two-tailed	Two-tailed	Two-tailed	Two-tailed	Two-tailed	Two-tailed	Two-tailed	Two-tailed	Two-tailed	Two-tailed	Two-tailed	Two-tailed	Two-tailed	Two-tailed	Two-tailed
Sum of ranks in column A,B	1943 , 2617	1273 , 1653	323 , 457	275 , 190	1872 , 2688	1895 , 2665	2310 , 2250	2181 , 2380	1880 , 2680	1023 , 3348	1172 , 1989	1152 , 2009	1464 , 1696	1514 , 1646	1278 , 1883	1019 , 2142	287 , 938	300.5 , 924.5	280.5 , 944.5	342 , 883	361 , 864	386.5 , 694.5	435.5 , 599.5	435 , 600	429.5 , 605.5	484.5 , 505.5	381 , 654	474.5 , 471.5
Mann-Whitney U	1040	643	170	70	1011	1034	765	894.5	1019	162	541.5	521.5	706	656	647.5	388.5	151	164.5	144.5	206	225	198.5	225.5	225	219.5	205.5	171	171.5
Difference between medians
Median of column A	16.00, n=42	17.00, n=35	14.00, n=17	9.000, n=15	14.85, n=41	12.43, n=41	1.000, n=41	0.01000, n=41	191.0, n=41	26.00, n=41	10.40, n=35	8.500, n=35	0.9000, n=35	0.000, n=35	143.0, n=35	131.0, n=35	9.775, n=16	7.615, n=16	0.8000, n=16	0.000, n=16	172.5, n=16	138.0, n=15	10.71, n=20	8.620, n=20	1.270, n=20	0.01000, n=20	211.5, n=20	80.00, n=19
Median of column B	17.00, n=53	17.00, n=41	13.50, n=22	8.000, n=15	15.75, n=54	12.71, n=54	0.7000, n=54	0.000, n=54	198.0, n=54	241.0, n=52	14.35, n=44	12.25, n=44	0.6500, n=44	0.000, n=44	185.5, n=44	251.0, n=44	13.10, n=33	10.50, n=33	1.200, n=33	0.000, n=33	194.0, n=33	110.0, n=31	10.70, n=25	8.600, n=25	1.400, n=25	0.000, n=24	274.0, n=25	51.00, n=24
Difference: Actual	1	0	-0.5	-1	0.9	0.275	-0.3	-0.01	7	215	3.95	3.75	-0.25	0	42.5	120	3.325	2.885	0.4	0	21.5	-28	-0.01	-0.02	0.13	-0.01	62.5	-29
Difference: Hodges-Lehmann	0	1	1	-1	1.1	0.9	-0.29	0	13	198.6	3.105	3.2	-0.06	0	23.5	109	3.73	3.025	0.33	0	21	-20	0.9	0.775	0.16	0	53.5	-26

## Sheet: Table S1.8
SIRSs vs Pulmonary Sepsis Mann-Whitney
Table Analyzed	SOFA SCORE D1	SOFA SCORE D2	SOFA SCORE D5	SOFA SCORE DISCHARGE	WBCS D1	Neutrophils D1	Lymphocytes D1	Basophils D1	Platelets D1	CRP D1	WBC D2	NEUTROPHILS D2	Lymphocytes D2	Basophils D2	Platelets D2	CRP DAY 2	WBC D5	Neutrophils D5	Lymphocytes D5	Basophils D5	Platelets D5	CRP D5	WBC Discharge	Neutrophils Discharge	Lymphocytes Discharge	Basophils Discharge	Platelets Discharge	CRP Discharge
Column B	SEPSIS	SEPSIS	SEPSIS	SEPSIS	SEPSIS	SEPSIS	SEPSIS	SEPSIS	SEPSIS	SEPSIS	SEPSIS	SEPSIS	SEPSIS	SEPSIS	SEPSIS	SEPSIS	SEPSIS	SEPSIS	SEPSIS	SEPSIS	SEPSIS	SEPSIS	SEPSIS	SEPSIS	SEPSIS	SEPSIS	SEPSIS	SEPSIS
vs.	vs.	vs.	vs.	vs.	vs.	vs.	vs.	vs.	vs.	vs.	vs.	vs.	vs.	vs.	vs.	vs.	vs.	vs.	vs.	vs.	vs.	vs.	vs.	vs.	vs.	vs.	vs.	vs.
Column A	SIRS	SIRS	SIRS	SIRS	SIRS	SIRS	SIRS	SIRS	SIRS	SIRS	SIRS	SIRS	SIRS	SIRS	SIRS	SIRS	SIRS	SIRS	SIRS	SIRS	SIRS	SIRS	SIRS	SIRS	SIRS	SIRS	SIRS	SIRS
Mann Whitney test
P value	0.2007	0.7943	0.291	0.1053	0.3627	0.253	0.0004	0.1327	0.4457	<0.0001	0.0033	0.0021	0.7023	0.9173	0.5213	0.0005	0.0797	0.1122	0.1172	0.6077	0.7007	0.1244	0.7509	0.305	0.852	0.4162	0.0966	0.0655
Exact or approximate P value?	Exact	Exact	Exact	Exact	Exact	Exact	Exact	Exact	Exact	Exact	Exact	Exact	Exact	Exact	Exact	Exact	Exact	Exact	Exact	Exact	Exact	Exact	Exact	Exact	Exact	Exact	Exact	Exact
P value summary	ns	ns	ns	ns	ns	ns	***	ns	ns	****	**	**	ns	ns	ns	***	ns	ns	ns	ns	ns	ns	ns	ns	ns	ns	ns	ns
Significantly different (P < 0.05)?	No	No	No	No	No	No	Yes	No	No	Yes	Yes	Yes	No	No	No	Yes	No	No	No	No	No	No	No	No	No	No	No	No
One- or two-tailed P value?	Two-tailed	Two-tailed	Two-tailed	Two-tailed	Two-tailed	Two-tailed	Two-tailed	Two-tailed	Two-tailed	Two-tailed	Two-tailed	Two-tailed	Two-tailed	Two-tailed	Two-tailed	Two-tailed	Two-tailed	Two-tailed	Two-tailed	Two-tailed	Two-tailed	Two-tailed	Two-tailed	Two-tailed	Two-tailed	Two-tailed	Two-tailed	Two-tailed
Sum of ranks in column A,B	2365 , 5261	1876 , 3585	555 , 2220	374.5 , 486.5	2334 , 5047	2292 , 5090	3139 , 4243	2720 , 4541	2361 , 5020	1132 , 6129	1426 , 4139	1396 , 4065	1894 , 3567	1834 , 3522	1760 , 3805	1327 , 4030	442.5 , 2043	454 , 2031	449.5 , 1966	529.5 , 1886	596 , 1889	585 , 1495	516 , 709	551 , 674	490.5 , 734.5	461 , 764	418 , 807	553 , 623
Mann-Whitney U	1462	1170	402	135.5	1473	1431	1003	1381	1500	270.5	796	765.5	1152	1176	1130	696.5	306.5	318	313.5	393.5	404	270	274	239	280.5	251	208	188
Difference between medians
Median of column A	16.00, n=42	17.00, n=35	14.00, n=17	9.000, n=15	14.85, n=41	12.43, n=41	1.000, n=41	0.01000, n=41	191.0, n=41	26.00, n=41	10.40, n=35	8.500, n=35	0.9000, n=35	0.000, n=35	143.0, n=35	131.0, n=35	9.775, n=16	7.615, n=16	0.8000, n=16	0.000, n=16	172.5, n=16	138.0, n=15	10.71, n=20	8.620, n=20	1.270, n=20	0.01000, n=20	211.5, n=20	80.00, n=19
Median of column B	17.00, n=81	16.00, n=69	14.00, n=57	8.500, n=26	15.60, n=80	14.00, n=80	0.6600, n=80	0.000, n=79	207.5, n=80	206.0, n=79	15.40, n=70	12.70, n=69	0.8000, n=69	0.000, n=68	159.0, n=70	203.2, n=68	11.75, n=54	9.800, n=54	1.100, n=53	0.000, n=53	166.5, n=54	94.00, n=49	10.10, n=29	7.400, n=29	1.200, n=29	0.02000, n=29	282.0, n=29	48.00, n=29
Difference: Actual	1	-1	0	-0.5	0.75	1.57	-0.34	-0.01	16.5	180	5	4.2	-0.1	0	16	72.15	1.975	2.185	0.3	0	-6	-44	-0.61	-1.22	-0.07	0.01	70.5	-32
Difference: Hodges-Lehmann	1	0	1	-2	1.465	1.7	-0.34	0	14	170	3.83	3.8	-0.03	0	11	71	2.4	2.035	0.2	0	-12	-33	-0.39	-0.9	0.03	0	70	-34

## Sheet: Table S1.9
Pulmonary vs abdominal Sepsis Mann-Whitney
Table Analyzed	SOFA SCORE D1	SOFA SCORE D2	SOFA SCORE D5	SOFA SCORE DISCHARGE	WBCS D1	Neutrophils D1	Lymphocytes D1	Basophils D1	Platelets D1	CRP D1	WBC D2	NEUTROPHILS D2	Lymphocytes D2	Basophils D2	Platelets D2	CRP DAY 2	WBC D5	Neutrophils D5	Basophils D5	Platelets D5	CRP D5	WBC Discharge	Neutrophils Discharge	Lymphocytes Discharge	Basophils Discharge	Platelets Discharge	CRP Discharge
Column B	ABDOMINAL	ABDOMINAL	ABDOMINAL	ABDOMINAL	ABDOMINAL	ABDOMINAL	ABDOMINAL	ABDOMINAL	ABDOMINAL	ABDOMINAL	ABDOMINAL	ABDOMINAL	ABDOMINAL	ABDOMINAL	ABDOMINAL	ABDOMINAL	ABDOMINAL	ABDOMINAL	ABDOMINAL	ABDOMINAL	ABDOMINAL	ABDOMINAL	ABDOMINAL	ABDOMINAL	ABDOMINAL	ABDOMINAL	ABDOMINAL
vs.	vs.	vs.	vs.	vs.	vs.	vs.	vs.	vs.	vs.	vs.	vs.	vs.	vs.	vs.	vs.	vs.	vs.	vs.	vs.	vs.	vs.	vs.	vs.	vs.	vs.	vs.	vs.
Column A	PULMONARY	PULMONARY	PULMONARY	PULMONARY	PULMONARY	PULMONARY	PULMONARY	PULMONARY	PULMONARY	PULMONARY	PULMONARY	PULMONARY	PULMONARY	PULMONARY	PULMONARY	PULMONARY	PULMONARY	PULMONARY	PULMONARY	PULMONARY	PULMONARY	PULMONARY	PULMONARY	PULMONARY	PULMONARY	PULMONARY	PULMONARY
Mann Whitney test
P value	0.7146	0.2901	0.95	0.8547	0.8344	0.5171	0.3369	0.6808	0.8716	0.3874	0.5057	0.5158	0.6287	0.2276	0.6563	0.1995	0.4043	0.4605	0.2541	0.2004	0.5183	0.3406	0.2151	0.4557	0.1774	0.8399	0.7531
Exact or approximate P value?	Exact	Exact	Exact	Exact	Exact	Exact	Exact	Exact	Exact	Exact	Exact	Exact	Exact	Exact	Exact	Exact	Exact	Exact	Exact	Exact	Exact	Exact	Exact	Exact	Exact	Exact	Exact
P value summary	ns	ns	ns	ns	ns	ns	ns	ns	ns	ns	ns	ns	ns	ns	ns	ns	ns	ns	ns	ns	ns	ns	ns	ns	ns	ns	ns
Significantly different (P < 0.05)?	No	No	No	No	No	No	No	No	No	No	No	No	No	No	No	No	No	No	No	No	No	No	No	No	No	No	No
One- or two-tailed P value?	Two-tailed	Two-tailed	Two-tailed	Two-tailed	Two-tailed	Two-tailed	Two-tailed	Two-tailed	Two-tailed	Two-tailed	Two-tailed	Two-tailed	Two-tailed	Two-tailed	Two-tailed	Two-tailed	Two-tailed	Two-tailed	Two-tailed	Two-tailed	Two-tailed	Two-tailed	Two-tailed	Two-tailed	Two-tailed	Two-tailed	Two-tailed
Sum of ranks in column A,B	5548 , 3497	3659 , 2447	2286 , 874	553 , 308	5447 , 3599	5544 , 3502	5188 , 3857	5367 , 3544	5436 , 3609	5030 , 3617	4140 , 2415	4044 , 2397	4016 , 2426	4009 , 2319	3948 , 2607	3626 , 2702	2280 , 1548	2291 , 1537	2193 , 1549	2229 , 1599	1919 , 1322	742 , 743	725.5 , 759.5	754 , 731	853 , 578	809.5 , 675.5	765 , 666
Mann-Whitney U	2066	1244	621	188	2114	2017	1948	2059	2124	1870	1425	1407	1436	1329	1463	1280	795	806	761.5	744	693.5	307	290.5	319	278	350.5	330
Difference between medians
Median of column A	17.00, n=81	16.00, n=69	14.00, n=57	8.500, n=26	15.60, n=80	14.00, n=80	0.6600, n=80	0.000, n=79	207.5, n=80	206.0, n=79	15.40, n=70	12.70, n=69	0.8000, n=69	0.000, n=68	159.0, n=70	203.2, n=68	11.75, n=54	9.800, n=54	0.000, n=53	166.5, n=54	94.00, n=49	10.10, n=29	7.400, n=29	1.200, n=29	0.02000, n=29	282.0, n=29	48.00, n=29
Median of column B	17.00, n=53	17.00, n=41	13.50, n=22	8.000, n=15	15.75, n=54	12.71, n=54	0.7000, n=54	0.000, n=54	198.0, n=54	241.0, n=52	14.35, n=44	12.25, n=44	0.6500, n=44	0.000, n=44	185.5, n=44	251.0, n=44	13.10, n=33	10.50, n=33	0.000, n=33	194.0, n=33	110.0, n=31	10.70, n=25	8.600, n=25	1.400, n=25	0.000, n=24	274.0, n=25	51.00, n=24
Difference: Actual	0	1	-0.5	-0.5	0.15	-1.295	0.04	0	-9.5	35	-1.05	-0.45	-0.15	0	26.5	47.8	1.35	0.7	0	27.5	16	0.6	1.2	0.2	-0.02	-8	3
Difference: Hodges-Lehmann	0	1	0	0	-0.305	-0.9	0.1	0	-4	19	-0.9	-0.74	-0.01	0	9	36	1.275	0.9	0	31	12	1.2	1.32	0.1	0	-8	5

## Sheet: Table S1.10
Clinical Parameter	SIRS vs Sepsis	SIRS vs Pulmonary sepis	SIRS vs Abdominal sepsis	Pulmonary vs Abdominal sepsis		Mann-whitney U-Test p-values summary
SOFA SCORE D1	0.3398	0.2007	0.5853	0.7146		p ≤ 0.0001	text
SOFA SCORE D2	0.9814	0.7943	0.4386	0.2901		p ≥ 0.0001, < 0.05	text
SOFA SCORE D5	0.3608	0.291	0.6373	0.95
SOFA SCORE DISCHARGE	0.066	0.1053	0.0741	0.8547
CRP D1	0.0001	0.0001	0.0001	0.3874
CRP D2	0.0001	0.0005	0.0001	0.1995
CRP D5	0.163	0.1244	0.433	0.5183
CRP Discharge	0.0715	0.0655	0.1707	0.7531
WBC D1	0.4394	0.3627	0.4737	0.8344
WBC D2	0.003	0.0033	0.0237	0.5057
WBC D5	0.0274	0.0797	0.0151	0.4043
WBC Discharge	0.9976	0.7509	0.5831	0.3406
Neutrophils D1	0.3851	0.253	0.5863	0.5171
Neutrophils D2	0.0016	0.0021	0.0137	0.5158
Neutrophils D5	0.0475	0.1122	0.0333	0.4605
Neutrophils Discharge	0.6971	0.305	0.5754	0.2151
Lymphocytes D1	0.0002	0.0004	0.0097	0.3369
Lymphocytes D2	0.595	0.7023	0.5305	0.6287
Lymphocytes D5	0.0383	0.1172	0.0098	0.4014
Lymphocytes Discharge	0.7101	0.852	0.4931	0.4557
Platelets D1	0.4513	0.4457	0.5114	0.8716
Platelets D2	0.3315	0.5213	0.229	0.6563
Platelets D5	0.952	0.7007	0.4127	0.2004
Platelets Discharge	0.067	0.0966	0.0727	0.8399
Basophils D1	0.0436	0.1327	0.0687	0.6808
Basophils D2	0.4834	0.9173	0.1869	0.2276
Basophils D5	0.3777	0.6077	0.1723	0.2541
Basophils Discharge	0.9772	0.4162	0.3944	0.1774

[truncated: 2 more sheets: Table S1.11, Table S1.12]
