# Supplementary material for: The ‘analysis of gene expression and biomarkers for point-of-care decision support in Sepsis‘ study; temporal clinical parameter analysis and validation of early diagnostic biomarker signatures for severe inflammation andsepsis-SIRS discrimination
Source: Front Immunol. 2024 Jan 25;14:1308530. doi: 10.3389/fimmu.2023.1308530 (PMC10850284; doi:10.3389/fimmu.2023.1308530)
Supplement: Supplementary file 4 [file Table_2.xlsx]

## Sheet: Table S2.1
ANOVA disease groups across all days	ProbeName	GeneSymbol	p value corrected BH-FDR ( [Control] vs [OOHCA] vs [Abdominal] vs [Pulmonary] )	p value uncorrected ( [Control] vs [OOHCA] vs [Abdominal] vs [Pulmonary] )	FC ([OOHCA] vs [Control])	Regulation	FC ([Abdominal] vs [Control])	Regulation ([Abdominal] vs [Control])	FC ([Pulmonary] vs [Control])	Regulation ([Pulmonary] vs [Control])	Description	GeneName	Sequence
	A_32_P108254	FAM20A	0	0	51.0935	up	56.6511	up	31.3566	up	Homo sapiens family with sequence similarity 20, member A (FAM20A), transcript variant 1, mRNA [NM_017565]	family with sequence similarity 20, member A	TCGTGCGTTGCCTTGCTCCGTTTTTCCCAAAAAGCACTGGCTTCATCAAGGCCACCGACG
	A_24_P352952	FAM20A	0	0	21.3506	up	28.6049	up	16.7772	up	Homo sapiens family with sequence similarity 20, member A (FAM20A), transcript variant 1, mRNA [NM_017565]	family with sequence similarity 20, member A	GTGGGAGGTCAATCCCCTTTACTGTGACACAGTGAAACAGATCTACCCGTACAACAACAG
	A_23_P252062	PPARG	0	0	20.7755	up	21.2779	up	15.1564	up	Homo sapiens peroxisome proliferator-activated receptor gamma (PPARG), transcript variant 3, mRNA [NM_138711]	peroxisome proliferator-activated receptor gamma	CCAAGGCTTCATGACAAGGGAGTTTCTAAAGAGCCTGCGAAAGCCTTTTGGTGACTTTAT
	A_23_P127948	ADM	0	0	11.8248	up	12.8197	up	9.70574	up	Homo sapiens adrenomedullin (ADM), mRNA [NM_001124]	adrenomedullin	GTGTAAAGTTGTTCGCCGCGTGGAATGTGAGTGTGTTTGTGTGCATGAAAGAGAAAGACT
	A_33_P3317613	SYN2	0	0	10.6321	up	9.30861	up	8.33008	up	Homo sapiens synapsin II (SYN2), transcript variant IIa, mRNA [NM_133625]	synapsin II	GTTCATCTCCTAATAAACGTTAAGACCTTTGGTGTAATAAAAGCAGCAGCATTCACCAAC
	A_23_P106362	AQP9	0	0	9.08888	up	6.44079	up	5.82951	up	Homo sapiens aquaporin 9 (AQP9), mRNA [NM_020980]	aquaporin 9	TCTACATCAAGGGATGCACCTTCAGTCAAACTGTCAAAAAGCCCAGAATTCCCAAAGGCA
	A_23_P162589	VDR	0	0	3.86168	up	3.69747	up	3.02788	up	Homo sapiens vitamin D (1,25- dihydroxyvitamin D3) receptor (VDR), transcript variant 2, mRNA [NM_001017535]	vitamin D (1,25- dihydroxyvitamin D3) receptor	CAAGCGAGGTCAACAGAGAAGGCAGGAATGTGTGGCAGATTTAGTGAAAGCTAGAGATAT
	A_23_P122863	GRB10	1.7771e-41	2.8e-45	16.9799	up	20.9953	up	21.2071	up	Homo sapiens growth factor receptor-bound protein 10 (GRB10), transcript variant 4, mRNA [NM_001001555]	growth factor receptor-bound protein 10	GAAAATAAACTGGAATGATCATCTATGGCTTGGGCCGCTTAGGAACAAGAACCGGAGAGA
	A_33_P3319967	ARG1	1.18476e-40	2.1e-44	68.5827	up	86.7492	up	59.3264	up	Homo sapiens arginase 1 (ARG1), transcript variant 1, mRNA [NM_001244438]	arginase 1	CATACATAGAGTGGGACTCTTGGAATCAGGAGACAAAGCTACCACATGTGGAAAGGTACT
	A_23_P330561	MCEMP1	4.54944e-40	9e-44	9.29444	up	9.66906	up	7.04231	up	Homo sapiens mast cell-expressed membrane protein 1 (MCEMP1), mRNA [NM_174918]	mast cell-expressed membrane protein 1	CTGTCTCCCTGTTTGTGTAAACATACTAGAGTATACTGCGGCGTGTTTTCTGTCTACCCA
	A_23_P75769	MS4A4A	7.52209e-39	1.631e-42	6.42963	up	9.22565	up	5.00643	up	Homo sapiens membrane-spanning 4-domains, subfamily A, member 4A (MS4A4A), transcript variant 2, mRNA [NM_024021]	membrane-spanning 4-domains, subfamily A, member 4A	CACCAAAAGATCAACAGACAAATGCTCCAGAAATCTATGCTGACTGTGACACAAGAGCCT
	A_23_P165624	TNFAIP6	1.32109e-36	3.12512e-40	7.51996	up	11.075	up	8.2248	up	Homo sapiens tumor necrosis factor, alpha-induced protein 6 (TNFAIP6), mRNA [NM_007115]	tumor necrosis factor, alpha-induced protein 6	AAATGAGTACGAAGATAACCAAATCTGCTACTGGCACATTAGACTCAAGTATGGTCAGCG
	A_24_P64653	METTL7B	7.03415e-36	1.80263e-39	15.1439	up	28.5051	up	11.3951	up	Homo sapiens methyltransferase like 7B (METTL7B), mRNA [NM_152637]	methyltransferase like 7B	ATGGAAGCTGGGCCTTCATGTGGCAGCAAGTTTTCGAGCCCACCTGGAAACACATTGGGG
	A_21_P0014102	LOC643072	1.87248e-35	5.16769e-39	5.82798	up	3.92118	up	4.31977	up	Homo sapiens uncharacterized LOC643072 (LOC643072), transcript variant 1, long non-coding RNA [NR_110587]	uncharacterized LOC643072	GGGGTAAAATTCTACTGCCTTTCCACGGACAAGTTAAACTGGCTGTAATGTTTATGCACT
	A_33_P3384562	PDLIM7	2.99365e-35	8.85207e-39	4.39662	up	4.62553	up	4.42074	up	Homo sapiens PDZ and LIM domain 7 (enigma) (PDLIM7), transcript variant 4, mRNA [NM_213636]	PDZ and LIM domain 7 (enigma)	GGTACTGCTGTCTGCCAGGTCTGTGCTGCCTTGGGCATGGAATAAACATTCTCAGCCCTG
	A_33_P3352382	ARG1	4.51373e-35	1.42367e-38	43.0999	up	65.6045	up	42.4045	up	Homo sapiens arginase 1 (ARG1), transcript variant 1, mRNA [NM_001244438]	arginase 1	TTCGGACTTGCTCGGGAGGGTAATCACAAGCCTATTGACTACCTTAACCCACCTAAGTAA
	A_23_P128084	ITGA7	8.5042e-35	3.01757e-38	8.46775	up	25.8126	up	11.6645	up	Homo sapiens integrin, alpha 7 (ITGA7), transcript variant 2, mRNA [NM_002206]	integrin, alpha 7	AGGAGGTTGTGTCACTGACTCAGGCTGCTCCTTCTCTAGTTTCCCCTCTCATCTGACCTT
	A_23_P55649	FPR2	8.5042e-35	2.94553e-38	5.56693	up	4.2832	up	4.22327	up	Homo sapiens formyl peptide receptor 2 (FPR2), transcript variant 1, mRNA [NM_001462]	formyl peptide receptor 2	GTGTTATTTTTTGTTTTTTGACTTCTGCCTATACCCTGGGGTAAGTGGAGTTGGGAAATA
	A_32_P208350	TDRD9	2.61456e-34	1.03082e-37	10.0846	up	18.3232	up	11.1019	up	Homo sapiens tudor domain containing 9 (TDRD9), mRNA [NM_153046]	tudor domain containing 9	CTCTTTGGGTGATAGTCAGAGAGTGGTGTTTTTGTTCAGGTGGGAAGGATTGGAAACTCT
	A_24_P235266	GRB10	2.61456e-34	1.0271e-37	9.13637	up	13.7284	up	11.8265	up	Homo sapiens growth factor receptor-bound protein 10 (GRB10), transcript variant 4, mRNA [NM_001001555]	growth factor receptor-bound protein 10	TCTTTGGCTCGTGAACCTAATTGTAAACTTTCAGGTATTTTTGTACAAATAAGGGACTGA
	A_23_P67847	GALNT14	6.18387e-34	2.55995e-37	18.0074	up	22.1231	up	18.6388	up	Homo sapiens polypeptide N-acetylgalactosaminyltransferase 14 (GALNT14), transcript variant 1, mRNA [NM_024572]	polypeptide N-acetylgalactosaminyltransferase 14	AAGCCTTCTTTTTCACTAGGCCAGGACTACATTGAGAGATGAAGAATGGAGGTTGTTTCC
	A_23_P40174	MMP9	7.14991e-34	3.10081e-37	42.6514	up	39.2571	up	24.4276	up	Homo sapiens matrix metallopeptidase 9 (gelatinase B, 92kDa gelatinase, 92kDa type IV collagenase) (MMP9), mRNA [NM_004994]	matrix metallopeptidase 9 (gelatinase B, 92kDa gelatinase, 92kDa type IV collagenase)	TGGAGGTGGGCTGGGCCCTCTCTTCTCACCTTTGTTTTTTGTTGGAGTGTTTCTAATAAA
	A_23_P259863	CD177	1.44733e-33	6.56217e-37	42.2747	up	132.086	up	56.4832	up	Homo sapiens CD177 molecule (CD177), mRNA [NM_020406]	CD177 molecule	CTTGGACACCAGATTCTTTCCCATTCTGTCCATGAATCATCTTCCCCACACACAATCATT
	A_23_P158725	SLC16A3	1.89534e-33	8.96706e-37	4.1221	up	3.2277	up	3.02393	up	Homo sapiens solute carrier family 16 (monocarboxylate transporter), member 3 (SLC16A3), transcript variant 2, mRNA [NM_001042422]	solute carrier family 16 (monocarboxylate transporter), member 3	GTCTTGGGGACAGCTCTTTCCACCCCTGGAAGATGGAAATAAACCTGCGTGTGGGTGGAG
	A_23_P13753	NFE2	2.19101e-33	1.07978e-36	5.77211	up	4.43845	up	4.39811	up	Homo sapiens nuclear factor, erythroid 2 (NFE2), transcript variant 1, mRNA [NM_006163]	nuclear factor, erythroid 2	GGCAACAAGTGTTTGGAAGTTCCAAGGTGTGTTCAAAGAGGCTTGCCTTGAGGGAGGGCT
	A_23_P108437	FZD5	4.16411e-33	2.13426e-36	5.81468	up	4.99132	up	3.99439	up	Homo sapiens frizzled class receptor 5 (FZD5), mRNA [NM_003468]	frizzled class receptor 5	AGCCAAATGAGGCACATACCGAGTCAGTAGTTGAAGTCCAGGGCATTCGATACTGTTTAT
	A_33_P3213518		4.90805e-33	2.80582e-36	17.1686	up	26.0517	up	17.2847	up			ACCTGATACACCAGTCCTGTTCATTTGGAAAAGGGACAACTCCTTCACATTCACAAGCTG
	A_33_P3350863	RETN	4.90805e-33	2.7499e-36	17.9292	up	22.6856	up	10.3109	up	Homo sapiens resistin (RETN), transcript variant 1, mRNA [NM_020415]	resistin	CTCCAGGTCCGGAGGGGTTGCGGGGGAGCTGGAAATAAACCTGGAGATGATGATGATGAT
	A_23_P38795	FPR1	4.90805e-33	2.78424e-36	4.09037	up	3.22297	up	3.55895	up	Homo sapiens formyl peptide receptor 1 (FPR1), transcript variant 2, mRNA [NM_002029]	formyl peptide receptor 1	ACTTTACCTTCTGCAGAGGTGGCGTTACAGGCAAAGTGAGGAGGGAGCTGGGGGACACTT
	A_23_P28485	GCA	6.00805e-33	3.66661e-36	5.52358	up	4.87964	up	4.60316	up	Homo sapiens grancalcin, EF-hand calcium binding protein (GCA), mRNA [NM_012198]	grancalcin, EF-hand calcium binding protein	TGGTGGTGTTTGAGGGTTGGCTAGAAATGAAAGCCTGGATTTTGTGCCATGTTTGTAATA
	A_23_P388900	SLC22A15	6.00805e-33	3.67153e-36	4.62698	up	3.81916	up	3.77579	up	Homo sapiens solute carrier family 22, member 15 (SLC22A15), mRNA [NM_018420]	solute carrier family 22, member 15	AGGCTAGGCTGGCCATCAGTTGCTTATTTCAGATGTGTCACTAAATTTTCCTTCTAGATG
	A_23_P68851	KREMEN1	7.16499e-33	4.51978e-36	11.8856	up	7.81924	up	8.90235	up	Homo sapiens kringle containing transmembrane protein 1 (KREMEN1), transcript variant 3, mRNA [NM_001039570]	kringle containing transmembrane protein 1	CATCGTGGGTCTCATGCACGTCAAGACCTTCCCACATCCAAACTCAGCTTCCAGCAGGGA
	A_23_P125977	C1QC	9.95853e-33	6.47831e-36	5.21229	up	17.9195	up	7.26921	up	Homo sapiens complement component 1, q subcomponent, C chain (C1QC), transcript variant 2, mRNA [NM_172369]	complement component 1, q subcomponent, C chain	GCAGCGGCGTCAAAGTGGTCACCTTCTGTGGCCACACGTCCAAAACCAATCAGGTCAACT
	A_19_P00317683	LINC00963	1.23566e-32	8.28192e-36	3.95955	up	2.01394	up	2.53617	up	long intergenic non-protein coding RNA 963 [Source:HGNC Symbol;Acc:HGNC:48716] [ENST00000444184]	long intergenic non-protein coding RNA 963	CCTGGCACAGTGAAGCGAGGGTGGGGGCAGGAATGAGGGTCCTCTCCATGCAAGGGGGGA
	A_33_P3402329	MIR503HG	1.30144e-32	8.97932e-36	5.04237	up	7.92943	up	6.76142	up	Homo sapiens MIR503 host gene (non-protein coding) (MIR503HG), long non-coding RNA [NR_024607]	MIR503 host gene (non-protein coding)	AAACAGTGGGCTGTACTCCAGTGCTGGGACATTGAATGACTGTATGCTGCTTTTGATTTC
	A_32_P24585	SH3PXD2B	1.73742e-32	1.23299e-35	14.3611	up	8.89136	up	5.82624	up	Homo sapiens SH3 and PX domains 2B (SH3PXD2B), mRNA [NM_001017995]	SH3 and PX domains 2B	ACCTTGATTACAACCCACATTTCCTGCTTTGGGGAGCTTCCAAGTAACAGGCCATTTCTT
	A_23_P93217	SLC22A7	2.58745e-32	1.88724e-35	7.01048	up	4.77086	up	5.98785	up	Homo sapiens solute carrier family 22 (organic anion transporter), member 7 (SLC22A7), transcript variant 2, mRNA [NM_153320]	solute carrier family 22 (organic anion transporter), member 7	AGTGAACTTCTCCTATTACGGCCTGAGTCTGGATGTGTCGGGGCTGGGGCTGAACGTGTA
	A_21_P0000882	RNF157-AS1	3.66609e-32	2.74624e-35	-7.27208	down	-8.97883	down	-8.34435	down	Homo sapiens RNF157 antisense RNA 1 (RNF157-AS1), long non-coding RNA [NR_040017]	RNF157 antisense RNA 1	GTCAGGAACACCCTTGTTAATAGTTTAGCTGATACTGTTTCTCTAAGGTGGAAGTAAAAA
	A_33_P3241043		5.07363e-32	3.90064e-35	2.69481	up	2.21065	up	2.07942	up			CCTAGGGAGCCCCACCTTGTCTTGTACCATCAACAAAGTCCCCTGTGCTCAGCCAAAAAA
	A_24_P158946	FGD4	6.6981e-32	5.28158e-35	4.39749	up	4.09588	up	3.89267	up	Homo sapiens FYVE, RhoGEF and PH domain containing 4 (FGD4), mRNA [NM_139241]	FYVE, RhoGEF and PH domain containing 4	GGAAATGCTCCGACTACAAAGCTCAACTTGAATATGATGGTGGTAAATTGAGCAAAGTTT
	A_23_P434809	S100A8	7.52921e-32	6.08535e-35	4.77893	up	3.62666	up	3.47098	up	Homo sapiens S100 calcium binding protein A8 (S100A8), mRNA [NM_002964]	S100 calcium binding protein A8	AAAGCCATGAAGAAAGCCACAAAGAGTAGCTGAGTTACTGGGCCCAGAGGCTGGGCCCCT
	A_23_P80778	DIRC2	9.06702e-32	7.50699e-35	3.14428	up	2.70341	up	2.54115	up	Homo sapiens disrupted in renal carcinoma 2 (DIRC2), mRNA [NM_032839]	disrupted in renal carcinoma 2	ACACATAAAGCACTACCTAAGTAATTCTCTCTCTGTTTTGTGCCAGTGCTAAACTACTGA
	A_23_P138125	FAIM3	1.30866e-31	1.1093e-34	-4.79693	down	-4.36855	down	-4.45854	down	Homo sapiens Fas apoptotic inhibitory molecule 3 (FAIM3), transcript variant 1, mRNA [NM_005449]	Fas apoptotic inhibitory molecule 3	CAGCCTGCCGCCATGATGGAGGACAGTGATTCAGATGACTACATCAATGTTCCTGCCTGA
	A_23_P126735	IL10	1.36937e-31	1.18775e-34	6.16783	up	6.68651	up	5.00879	up	Homo sapiens interleukin 10 (IL10), mRNA [NM_000572]	interleukin 10	CCTAACCTCATTCCCCAACCACTTCATTCTTGAAAGCTGTGGCCAGCTTGTTATTTATAA
	A_23_P119222	RETN	1.46893e-31	1.30306e-34	11.7147	up	14.3032	up	6.47669	up	Homo sapiens resistin (RETN), transcript variant 1, mRNA [NM_020415]	resistin	CAATAAGCAGCATTGGCCTGGAGTGCCAGAGCGTCACCTCCAGGGGGGACCTGGCTACTT
	A_23_P376188	BEND7	1.53846e-31	1.39507e-34	8.03662	up	7.76994	up	7.93279	up	Homo sapiens BEN domain containing 7 (BEND7), transcript variant 2, mRNA [NM_001100912]	BEN domain containing 7	AAGGAGCTACTACCCAAGGGAAGGGAGAAGATTAATTGGTGACCTTTCGCCGTGTTAAAA
	A_23_P207058	SOCS3	1.84386e-31	1.7447e-34	10.279	up	5.14461	up	4.68868	up	Homo sapiens suppressor of cytokine signaling 3 (SOCS3), mRNA [NM_003955]	suppressor of cytokine signaling 3	GCAACTAAACAAACACAAAGTATTCTGTGTCAGGTATTGGGCTGGACAGGGCAGTTGTGT
	A_23_P88222	PLD4	1.84386e-31	1.72597e-34	-3.57096	down	-5.43211	down	-5.61974	down	Homo sapiens phospholipase D family, member 4 (PLD4), mRNA [NM_138790]	phospholipase D family, member 4	TGAAAGTCTTCATCGTGCCGGTGGGGAACCATTCCAACATCCCATTCAGCAGGGTGAACC
	A_32_P19294	GLT1D1	2.30066e-31	2.22229e-34	5.1774	up	3.78236	up	4.333	up	Homo sapiens glycosyltransferase 1 domain containing 1 (GLT1D1), mRNA [NM_144669]	glycosyltransferase 1 domain containing 1	CAGGTCCAATGTTGTCTTAGATCTGATGATGCTGCTATTTACAAAACACTGATCGTCCGA
	A_33_P3251093	SLC36A1	2.52455e-31	2.48832e-34	8.19213	up	6.32003	up	5.51827	up	Homo sapiens solute carrier family 36 (proton/amino acid symporter), member 1 (SLC36A1), mRNA [NM_078483]	solute carrier family 36 (proton/amino acid symporter), member 1	GATCCTGTTTTGGGGTTTGCACATGGATCGTATGTTAAGCTTTTTCTTTTCAATAAATGA
	A_33_P3251776	HSD3B7	3.24567e-31	3.26308e-34	5.92441	up	6.76496	up	5.65811	up	Homo sapiens hydroxy-delta-5-steroid dehydrogenase, 3 beta- and steroid delta-isomerase 7 (HSD3B7), transcript variant 2, mRNA [NM_001142777]	hydroxy-delta-5-steroid dehydrogenase, 3 beta- and steroid delta-isomerase 7	TTGTTTTTCAAAGGCCTCACCTTCAACTGTCTGTCTTAGAATTCCCCTCTGGAGGGCTAT
	A_33_P3334515	NDRG2	3.75268e-31	3.84678e-34	-1.45698	down	-2.67555	down	-2.58188	down	Homo sapiens NDRG family member 2 (NDRG2), transcript variant 11, mRNA [NM_001282213]	NDRG family member 2	GGAGGGTGCCCTCCCGTCTCCCACAACTTCTGCTATAACAATAAACTGTAGAGGAATCTG
	A_23_P137366	C1QB	3.96946e-31	4.14724e-34	4.87671	up	18.8114	up	6.96416	up	Homo sapiens complement component 1, q subcomponent, B chain (C1QB), mRNA [NM_000491]	complement component 1, q subcomponent, B chain	CACCGACAAGAACTCACTACTGGGCATGGAGGGTGCCAACAGCATCTTTTCCGGGTTCCT
	A_23_P48596	RNASE1	4.34091e-31	4.6209e-34	8.60707	up	11.4588	up	12.2459	up	Homo sapiens ribonuclease, RNase A family, 1 (pancreatic) (RNASE1), transcript variant 3, mRNA [NM_198232]	ribonuclease, RNase A family, 1 (pancreatic)	GTTAGGGCTCCTATTCAACACACACATGCTTCCCTTTCCTGAGTCCCATCCCTGCGTGAT
	A_33_P3246833	IL1RN	4.84391e-31	5.25183e-34	5.39119	up	3.23965	up	3.20849	up	Homo sapiens interleukin 1 receptor antagonist (IL1RN), transcript variant 4, mRNA [NM_173843]	interleukin 1 receptor antagonist	TGCAAAGTTCCCTACTTCCTGTGACTTCAGCTCTGTTTTACAATAAAATCTTGAAAATGC
	A_23_P253602	BMX	5.25602e-31	5.80226e-34	24.1241	up	24.8647	up	16.0621	up	Homo sapiens BMX non-receptor tyrosine kinase (BMX), transcript variant 2, mRNA [NM_001721]	BMX non-receptor tyrosine kinase	TTATGCTGCTCCTGATATAACACTTTCCAGCCTATAGCAGAAGCACATTTTCAGACTGCA
	A_23_P86838	SLC36A4	6.67751e-31	7.50312e-34	3.20199	up	2.13001	up	2.0856	up	Homo sapiens solute carrier family 36 (proton/amino acid symporter), member 4 (SLC36A4), transcript variant 1, mRNA [NM_152313]	solute carrier family 36 (proton/amino acid symporter), member 4	AAAGGAGGCCTAGAAAGGTTAAGTAACTTGGTCGAGACCACTCAGCCTTGAGATCAAGAA
	A_23_P103765	FCER1A	7.54255e-31	8.62379e-34	-4.87271	down	-18.9758	down	-14.4567	down	Homo sapiens Fc fragment of IgE, high affinity I, receptor for; alpha polypeptide (FCER1A), mRNA [NM_002001]	Fc fragment of IgE, high affinity I, receptor for; alpha polypeptide	AGCTCCGCGTGAGAAGTACTGGCTACAATTTTTTATCCCATTGTTGGTGGTGATTCTGTT
	A_24_P324674	LY9	9.85815e-31	1.14657e-33	-6.85924	down	-4.75244	down	-4.83597	down	Homo sapiens lymphocyte antigen 9 (LY9), transcript variant 1, mRNA [NM_002348]	lymphocyte antigen 9	CACCACCACAACAGAATGATCTTGAGATTCCTGAAAGTCCTACCTATGAAAATTTCACCT
	A_23_P408955	E2F2	1.2757e-30	1.50887e-33	3.75847	up	4.65813	up	2.82872	up	Homo sapiens E2F transcription factor 2 (E2F2), mRNA [NM_004091]	E2F transcription factor 2	CTTTATGAGCACCATGTAAGCCTCCTTGTATTGAGATAATTGGGCATTAAACATTAAACT
	A_33_P3399733	lnc-CDS1-2	1.93316e-30	2.32461e-33	16.4088	up	9.42408	up	9.01173	up	Homo sapiens cDNA clone IMAGE:40021650. [BC101193]	lnc-CDS1-2:1	CCATCCCGGAAAGTGAGGGGTTGTTGCCGTTTCCCGCAGCTGTTGGTGGCCATCTTTAAT
	A_33_P3220837	MAFB	2.07792e-30	2.53964e-33	4.76868	up	4.0283	up	2.8725	up	Homo sapiens v-maf avian musculoaponeurotic fibrosarcoma oncogene homolog B (MAFB), mRNA [NM_005461]	v-maf avian musculoaponeurotic fibrosarcoma oncogene homolog B	TGGCAGCAAGCTGAGGGTCTTTGTTTGGGTTTATTATTACGGTATTTTTGTTTGTAAGTT
	A_21_P0008673	lnc-FURIN-1	2.29579e-30	2.85118e-33	3.25869	up	2.75817	up	3.23884	up	LNCipedia lincRNA (lnc-FURIN-1), lincRNA [lnc-FURIN-1:1]	lnc-FURIN-1:1	TGATAAGGATTTGCGTCAGGCTACTGGCTACTCAGCAGCCGAGAAGAGCAAGCCTCCAGG
	A_33_P3262156	SLC8A1	3.64233e-30	4.59528e-33	3.79338	up	3.53946	up	3.99892	up	Homo sapiens solute carrier family 8 (sodium/calcium exchanger), member 1 (SLC8A1), transcript variant A, mRNA [NM_021097]	solute carrier family 8 (sodium/calcium exchanger), member 1	TGGCTCTTGTACATTTTCTTCTCCTCCCTGGAGGCCTACTGCCACATAAAAGGCTTCTAA
	A_24_P297539	UBE2C	4.43853e-30	5.68728e-33	5.04345	up	6.10909	up	5.2664	up	Homo sapiens ubiquitin-conjugating enzyme E2C (UBE2C), transcript variant 4, mRNA [NM_181801]	ubiquitin-conjugating enzyme E2C	TTGTCTTTTAAATTAAGCCTCGGTTGAGCCCTTGTATATTAAATAAATGCATTTTTGTCC
	A_23_P99253	LIN7A	5.58053e-30	7.37059e-33	3.8755	up	3.28307	up	3.18083	up	Homo sapiens lin-7 homolog A (C. elegans) (LIN7A), mRNA [NM_004664]	lin-7 homolog A (C. elegans)	TTGAGGGAAAGCTACTTGATCAAACATCCGATAGTCACAAATTTGAAACCGTGCTTCAGA
	A_33_P3382177	TIMP2	5.58053e-30	7.3326e-33	3.28804	up	2.25953	up	2.28703	up	Homo sapiens TIMP metallopeptidase inhibitor 2 (TIMP2), mRNA [NM_003255]	TIMP metallopeptidase inhibitor 2	TGCTTTGTATCATTCTTGAGCAATCGCTCGGTCCGTGGACAATAAACAGTATTATCAAAG
	A_24_P678104	STMN3	9.87972e-30	1.32436e-32	-3.47036	down	-3.24769	down	-3.218	down	Homo sapiens stathmin-like 3 (STMN3), transcript variant 1, mRNA [NM_015894]	stathmin-like 3	CTGCATGGTCTAGAGGTTGTGGGCAGCATGGACAGTCCCCCACTCAGAAGTGCAAGAGTT
	A_21_P0000921	LINC01352	1.30454e-29	1.77443e-32	5.55797	up	5.58261	up	6.03876	up	Homo sapiens long intergenic non-protein coding RNA 1352 (LINC01352), long non-coding RNA [NR_110797]	long intergenic non-protein coding RNA 1352	AAAGCAAGGGCAGGTCTCTGTGCCCCATCTCTAGCTTTTCCTCAACTTAGGCTTTATAAA
	A_33_P3245665		1.40896e-29	1.94423e-32	-4.9115	down	-5.30752	down	-4.70721	down	T cell receptor beta variable 20-1 [Source:HGNC Symbol;Acc:HGNC:12196] [ENST00000390394]		TCTGACAGTGACCAGTGCCCATCCTGAAGACAGCAGCTTCTACATCTGCAGTGCTAGAGA
	A_21_P0000856	IL10RB-AS1	1.41889e-29	2.01389e-32	3.31184	up	3.80066	up	2.60949	up	Homo sapiens IL10RB antisense RNA 1 (head to head) (IL10RB-AS1), long non-coding RNA [NR_038974]	IL10RB antisense RNA 1 (head to head)	CAATGGAAGACAACTCAAGACCACACCAAGTTTGTATTAAAAAAGTACTGTTGTGTTACT
	A_33_P3570208	LPP-AS2	1.41889e-29	2.01277e-32	4.23803	up	2.86063	up	2.40396	up	Homo sapiens LPP antisense RNA 2 (LPP-AS2), long non-coding RNA [NR_036497]	LPP antisense RNA 2	GCTCAGGTGAGCATGGTGAGCATGGTGTTAGCATGAACATCATATAAAGTTAACTACAAA
	A_23_P78209	MAFG	1.44948e-29	2.09604e-32	3.69037	up	3.42377	up	3.16926	up	Homo sapiens v-maf avian musculoaponeurotic fibrosarcoma oncogene homolog G (MAFG), transcript variant 1, mRNA [NM_002359]	v-maf avian musculoaponeurotic fibrosarcoma oncogene homolog G	CAGTATTTATTGCTAAATTATTGTCCAGGAGGGGCAGCACTGGGCCTGGCCCCCCGGGTA
	A_23_P94230	LY96	1.44948e-29	2.11444e-32	2.94457	up	2.28213	up	2.53967	up	Homo sapiens lymphocyte antigen 96 (LY96), transcript variant 1, mRNA [NM_015364]	lymphocyte antigen 96	TGAAGCTATTTCTGGGAGCCCAGAAGAAATGCTCTTTTGCTTGGAGTTTGTCATCCTACA
	A_21_P0011751	CD177	1.68162e-29	2.48623e-32	32.9725	up	126.224	up	52.4017	up	Homo sapiens CD177 molecule (CD177), mRNA [NM_020406]	CD177 molecule	ATTGTTATGATGGGTACATTCATCTCTCAGGAGGTGGGCTGACCACCAGAATGAGCATTC
	A_33_P3378491		2.05812e-29	3.08344e-32	-6.61027	down	-5.87425	down	-5.93478	down	T cell receptor beta variable 6-7 (non-functional) [Source:HGNC Symbol;Acc:HGNC:12232] [ENST00000390373]		TGACAAAGGAGAAGTTCCCAATGGCTACAATGTCTCCAGATCAAACACAGAGGATTTCCC
	A_23_P58266	S100P	2.08455e-29	3.16414e-32	8.66855	up	8.96523	up	7.0854	up	Homo sapiens S100 calcium binding protein P (S100P), mRNA [NM_005980]	S100 calcium binding protein P	CCAAAAGTGTTTGTTGGCAATTATTCCCCTAGGCTGAGCCTGCTCATGTACCTCTGATTA
	A_33_P3329255	NDST2	2.32257e-29	3.57121e-32	3.07265	up	2.33495	up	2.00742	up	N-deacetylase/N-sulfotransferase (heparan glucosaminyl) 2 [Source:HGNC Symbol;Acc:HGNC:7681] [ENST00000398701]	N-deacetylase/N-sulfotransferase (heparan glucosaminyl) 2	GCATGTACCTTTTCCCTACCTCTTAGGGCTGGTGTGAAGATTAAATATATGTGAAGCTCT
	A_24_P192727	KAZALD1	2.43535e-29	3.79264e-32	4.52235	up	4.88622	up	3.97215	up	Kazal-type serine peptidase inhibitor domain 1 [Source:HGNC Symbol;Acc:HGNC:25460] [ENST00000465807]	Kazal-type serine peptidase inhibitor domain 1	AAGAGGCGACATCTCTGGCAAGTTGGGAGTACAGGAAGTAGCGAAGGAGTGCCATCTGGT
	A_32_P116271	WDFY3-AS2	2.49277e-29	3.93119e-32	3.73146	up	3.06146	up	3.15831	up	Homo sapiens WDFY3 antisense RNA 2 (WDFY3-AS2), long non-coding RNA [NR_015359]	WDFY3 antisense RNA 2	AAGAAACTGGGCAAGCCAATGAAAGTCTCTGGGGATCATGGGAATTGAGTGTCTATGAAA
	A_23_P78782	CA11	3.15448e-29	5.03692e-32	-3.76655	down	-3.56071	down	-3.39155	down	Homo sapiens carbonic anhydrase XI (CA11), mRNA [NM_001217]	carbonic anhydrase XI	TCCTTAACCGCGACACCATCACTCGCATCTCCTACAAGAATGATGCCTACTTTCTTCAAG
	A_23_P161156	ZNF438	3.67932e-29	5.94748e-32	4.79807	up	4.41171	up	4.04757	up	Homo sapiens zinc finger protein 438 (ZNF438), transcript variant 2, mRNA [NM_182755]	zinc finger protein 438	GTGCTTTATGGTGGTGCTTAGTCACAAAGATCAAACAACAGGATTGGTGTGAGTGAACGG
	A_21_P0000956	lnc-ALPL-1	4.23615e-29	6.93108e-32	17.4771	up	8.06943	up	9.10272	up	LNCipedia lincRNA (lnc-ALPL-1), lincRNA [lnc-ALPL-1:1]	lnc-ALPL-1:1	TCCTTGCCCAACCCATGGGGGCCTTGCAATGATTAATAATAATAATGATGATGATAATGG
	A_24_P134816	BCL9L	4.74731e-29	7.86102e-32	-3.74222	down	-3.7433	down	-3.77166	down	Homo sapiens B-cell CLL/lymphoma 9-like (BCL9L), mRNA [NM_182557]	B-cell CLL/lymphoma 9-like	TGCTCCTACCCAGGAGAGCTCCCTATCCGCCTTTGGTCAGAGCTGAAGCCATATACGACT
	A_23_P49376	CETP	4.838e-29	8.10657e-32	1.29228	up	4.29791	up	3.53455	up	Homo sapiens cholesteryl ester transfer protein, plasma (CETP), transcript variant 1, mRNA [NM_000078]	cholesteryl ester transfer protein, plasma	AGCTCTTCTTAAGCCTCTTGGATTTCCAGATTACACCAAAGACTGTTTCCAACTTGACTG
	A_21_P0006984	lnc-ZNF438-1	5.16011e-29	8.74803e-32	8.82217	up	7.83335	up	6.98505	up	LNCipedia lincRNA (lnc-ZNF438-1), lincRNA [lnc-ZNF438-1:2]	lnc-ZNF438-1:2	CATGTATCTGCTCACCTAGAGCGTTTTGTAATGTCACTGGTGATTTAACAATTACAAAAT
	A_33_P3258977	CLEC4D	5.4931e-29	9.42083e-32	6.09324	up	4.11366	up	3.31715	up	Homo sapiens C-type lectin domain family 4, member D (CLEC4D), mRNA [NM_080387]	C-type lectin domain family 4, member D	GCATGAAACATTAATTGCAAAGGGCAGTCACATCCAACTTTAATAAAATATGGTGGTCTT
	A_33_P3253144	DOK3	6.58701e-29	1.14268e-31	4.17624	up	3.72817	up	3.04957	up	Homo sapiens docking protein 3 (DOK3), transcript variant 1, mRNA [NM_024872]	docking protein 3	ATAGTGTGCAGACTCACAGATAATAAAGCTCAGAGCAGCTCCCGGCAGGGGCACTCACGG
	A_24_P357468		7.45399e-29	1.30777e-31	-4.42578	down	-4.69593	down	-4.03224	down	T cell receptor alpha variable 8-2 [Source:HGNC Symbol;Acc:HGNC:12147] [ENST00000390434]		AACGGTTTTGAGGCTGAATTTAAGAAGAGTGAAACCTCCTTCCACCTGACGAAACCCTCA
	A_24_P190472	SLPI	7.60865e-29	1.3499e-31	6.72048	up	7.13746	up	8.63267	up	Homo sapiens secretory leukocyte peptidase inhibitor (SLPI), mRNA [NM_003064]	secretory leukocyte peptidase inhibitor	AAGAGATGTTGTCCTGACACTTGTGGCATCAAATGCCTGGATCCTGTTGACACCCCAAAC
	A_23_P206760	HP	7.9176e-29	1.42032e-31	18.6235	up	19.4864	up	12.8065	up	Homo sapiens haptoglobin (HP), transcript variant 1, mRNA [NM_005143]	haptoglobin	GATAAGATGTGGTTTGAAGCTGATGGGTGCCAGCCCTGCATTGCTGAGTCAATCAATAAA
	A_19_P00322371	LINC00963	7.97448e-29	1.44625e-31	3.38087	up	1.82495	up	2.21858	up	long intergenic non-protein coding RNA 963 [Source:HGNC Symbol;Acc:HGNC:48716] [ENST00000444184]	long intergenic non-protein coding RNA 963	GGCAGGAATGAGGGTCCTCTCCATGCAAGGGGGGAAGATAGAAGAACAAAATTTCACCCT
	A_33_P3290853		9.09499e-29	1.66739e-31	-7.05508	down	-7.20469	down	-6.13081	down	T cell receptor beta variable 11-2 [Source:HGNC Symbol;Acc:HGNC:12181] [ENST00000471935]		AGAAAAGGCAGAGTGTGGCTTTTTGGTGCAATCCTATATCTGGCCATGCTACCCTTTACT
	A_33_P3327265	TESPA1	1.54862e-28	2.86962e-31	-4.14502	down	-4.2459	down	-3.91074	down	Homo sapiens thymocyte expressed, positive selection associated 1 (TESPA1), transcript variant 1, mRNA [NM_001136030]	thymocyte expressed, positive selection associated 1	CAGACCAGAACTGCGTCGGTCTTTAAGCCAGCAGCCACAGGACACTTTTGACTTGGAGGA
	A_21_P0001244	LOC101927851	1.81037e-28	3.39034e-31	6.80675	up	5.02205	up	5.86813	up		uncharacterized LOC101927851	TGAAGCTTCCTCTCCTTTCTGCTGACAGCACTTCCTCATTAAATGCAGAGATCTGCAAAA
	A_33_P3329737		3.0346e-28	5.74281e-31	-8.06354	down	-7.12447	down	-6.69084	down	T cell receptor beta variable 19 [Source:HGNC Symbol;Acc:HGNC:12194] [ENST00000390393]		CACTGTGACATCGGCCCAAAAGAACCCGACAGCTTTCTATCTCTGTGCCAGTAGTATAGA
	A_23_P209625	CYP1B1	3.39512e-28	6.49201e-31	5.51935	up	4.47254	up	3.68354	up	Homo sapiens cytochrome P450, family 1, subfamily B, polypeptide 1 (CYP1B1), mRNA [NM_000104]	cytochrome P450, family 1, subfamily B, polypeptide 1	CTGTGTTTATATGGAAGAAAGTAAGGTGCTTGGAGTTTACCTGGCTTATTTAATATGCTT
	A_21_P0007695	lnc-ERGIC2-4	3.47267e-28	6.72358e-31	6.2873	up	11.7357	up	11.654	up	LNCipedia lincRNA (lnc-ERGIC2-4), lincRNA [lnc-ERGIC2-4:1]	lnc-ERGIC2-4:1	GCTGAAAAACGGCCAACGCCCATCCTAATTCCCTGGACAATGTAGGAGGTGTTTTGAACC
	A_33_P3391796	NOG	3.47267e-28	6.77721e-31	-9.47903	down	-16.6642	down	-12.6054	down	Homo sapiens noggin (NOG), mRNA [NM_005450]	noggin	GCACTGTTTAACTGTGTAGGAATGTATATGTGTGTGTATATACGGTCCCAGTTTTAATTT
	A_23_P57856	BCL6	3.629e-28	7.15384e-31	12.1575	up	9.9734	up	9.67392	up	Homo sapiens B-cell CLL/lymphoma 6 (BCL6), transcript variant 2, mRNA [NM_001130845]	B-cell CLL/lymphoma 6	CTGCGTTAAAGGCTCGATTTTGTATCTGCAGGCAGACACGGATCTGAGAATCTTTATTGA
	A_33_P3265309	CEACAM4	4.44147e-28	8.89488e-31	5.7656	up	4.43302	up	4.37659	up	Homo sapiens carcinoembryonic antigen-related cell adhesion molecule 4 (CEACAM4), mRNA [NM_001817]	carcinoembryonic antigen-related cell adhesion molecule 4	ATAAAGAGGACCCTTCCTCTCATTGGCTCTTTTTCTGCTCACGGGAACTTAGCAGAAACT
	A_23_P10182	ACOX2	4.44147e-28	8.93057e-31	6.52692	up	4.00975	up	3.05896	up	Homo sapiens acyl-CoA oxidase 2, branched chain (ACOX2), mRNA [NM_003500]	acyl-CoA oxidase 2, branched chain	GGAGATCCAAGCTATGAAATAACCAACAGTATTCAAGAAGCAACCAGCACCATCATGTGA
	A_23_P12463	QSOX1	4.64582e-28	9.43304e-31	3.55255	up	3.03716	up	2.65463	up	Homo sapiens quiescin Q6 sulfhydryl oxidase 1 (QSOX1), transcript variant 1, mRNA [NM_002826]	quiescin Q6 sulfhydryl oxidase 1	TCACCTTCCAGTGTGCAGAAGTTAGAAGGGTCTGGCGGGGGCAGTGCCTTACACATGCTT
	A_33_P3345816	GPER1	5.11807e-28	1.0568e-30	10.7454	up	9.06156	up	6.97485	up	Homo sapiens G protein-coupled estrogen receptor 1 (GPER1), transcript variant 3, mRNA [NM_001039966]	G protein-coupled estrogen receptor 1	TGCCAGGACAATGAAATACTCCAGCACCTGTGGCTGACGAATTTGTTTCTACAGAAATAA
	A_23_P130113	ASGR2	5.11807e-28	1.05937e-30	5.87997	up	4.61319	up	3.68211	up	Homo sapiens asialoglycoprotein receptor 2 (ASGR2), transcript variant H2', mRNA [NM_080912]	asialoglycoprotein receptor 2	GAGGACTGAGATCCCACCTCCTTCTGTAATTCATTGTAATTATTATAATCGTCAGCCTCT
	A_23_P130753	DBP	6.32832e-28	1.32235e-30	-2.89459	down	-3.52065	down	-3.38158	down	Homo sapiens D site of albumin promoter (albumin D-box) binding protein (DBP), mRNA [NM_001352]	D site of albumin promoter (albumin D-box) binding protein	CACGAGACCTTTGACCCTCGAAGACATCGCTTCTCAGAAGAGGAACTTAAGCCCCAGCCA
	A_33_P3299329		7.1222e-28	1.50228e-30	-6.65112	down	-6.75896	down	-5.63945	down	H.sapiens mRNA for T-cell receptor IGR b 18 Vbeta 7. [A25969]		TCTACAGTCTTGAAGAACGGGTTGAAAACAACAGTGTGCCAAGTCGCTTCTCACCTGAAT
	A_23_P112251	GNG10	8.42238e-28	1.79313e-30	4.36798	up	2.79593	up	2.45572	up	Homo sapiens guanine nucleotide binding protein (G protein), gamma 10 (GNG10), transcript variant 1, mRNA [NM_001017998]	guanine nucleotide binding protein (G protein), gamma 10	AGAATTCTTAACTTCACAAGTGTTTTACTTCGACGATGTGCCTTTGATTTAATTTGGGAC
	A_23_P77310	ZNF106	9.4456e-28	2.02959e-30	2.79786	up	2.20657	up	2.16096	up	Homo sapiens zinc finger protein 106 (ZNF106), transcript variant 1, mRNA [NM_022473]	zinc finger protein 106	TTCTCCTATTTAAGAGAAATATATGCCCTAGAGCTGCTCCAGCACCCTTGGTTTCTGATT
	A_24_P46093	SLC6A6	9.48556e-28	2.05687e-30	5.69794	up	4.16173	up	4.34809	up	Homo sapiens solute carrier family 6 (neurotransmitter transporter), member 6 (SLC6A6), transcript variant 1, mRNA [NM_003043]	solute carrier family 6 (neurotransmitter transporter), member 6	CCAATCCCTAGCAACTGTGACTCTGTATTTAGCACAAGAGAAAGCTGAGAATGTGGGTCT
	A_23_P1998	APBB1	1.1422e-27	2.4993e-30	-2.74352	down	-3.18528	down	-3.15965	down	Homo sapiens amyloid beta (A4) precursor protein-binding, family B, member 1 (Fe65) (APBB1), transcript variant 1, mRNA [NM_001164]	amyloid beta (A4) precursor protein-binding, family B, member 1 (Fe65)	ATGGCCGAACGGCGTAATGCCCGCTGCTTGGTAAATGGACTCTCCCTGGACCACTCTAAA
	A_23_P170186	OPLAH	1.14696e-27	2.53232e-30	8.22572	up	12.5146	up	8.56583	up	Homo sapiens 5-oxoprolinase (ATP-hydrolysing) (OPLAH), mRNA [NM_017570]	5-oxoprolinase (ATP-hydrolysing)	TCTATGAGTATCGCCGGGCCCAGGAGGCCGTGTGAGGATCCCGCAATAAAGATGCCTTAA
	A_33_P3394213	GRIN3B	1.19714e-27	2.68133e-30	10.8622	up	7.31983	up	7.24526	up	Homo sapiens glutamate receptor, ionotropic, N-methyl-D-aspartate 3B (GRIN3B), mRNA [NM_138690]	glutamate receptor, ionotropic, N-methyl-D-aspartate 3B	GAGCCGCTGTCAACAGACAGTTTATTCTATATACAAACACAATTTTGTACACTGCAATTA
	A_32_P47754	SLC2A14	1.19714e-27	2.71391e-30	6.02854	up	5.87233	up	4.60259	up	Homo sapiens solute carrier family 2 (facilitated glucose transporter), member 14 (SLC2A14), transcript variant 1, mRNA [NM_001286233]	solute carrier family 2 (facilitated glucose transporter), member 14	TTCACGTCAACTTCTGGCTCCTCAGTTTGGCAGTAAGGCAGGGAAGTTGTTTTCCTATTT
	A_23_P119835	NLRC4	1.19714e-27	2.70136e-30	3.32616	up	3.74013	up	2.74656	up	Homo sapiens NLR family, CARD domain containing 4 (NLRC4), transcript variant 1, mRNA [NM_021209]	NLR family, CARD domain containing 4	ATGGATGGCTTGCCTTCATGGGTGTATTTGAGAATCTTAAGCAATTAGTGTTTTTTGACT
	A_23_P24903	P2RY2	1.21399e-27	2.77604e-30	2.22664	up	1.10062	up	-1.07071	down	Homo sapiens purinergic receptor P2Y, G-protein coupled, 2 (P2RY2), transcript variant 1, mRNA [NM_176072]	purinergic receptor P2Y, G-protein coupled, 2	GCTCCCATGGGCTAGGAGCCAGTGTGAGGCTGTAACTTATACTAAAGGTTGTGTTGCCTG
	A_33_P3343577		1.32211e-27	3.04934e-30	-6.42343	down	-5.80681	down	-6.21097	down	T cell receptor beta variable 10-3 [Source:HGNC Symbol;Acc:HGNC:12179] [ENST00000611462]		GGCATGGGCTGAGGCTGATCCATTACTCATATGGTGTTAAAGATACTGACAAAGGAGAAG
	A_24_P349207	LOC441081	1.56282e-27	3.68803e-30	9.84149	up	6.80306	up	7.03204	up	Homo sapiens POM121 membrane glycoprotein (rat) pseudogene (LOC441081), non-coding RNA [NR_073404]	POM121 membrane glycoprotein (rat) pseudogene	CTTCCCACACTCTGTCCTCACTTGCAACAGGGGCTTCTGGTGGGCCTCCTGTTTCTAAAG
	A_33_P3220570	UBTD1	1.56282e-27	3.69607e-30	3.63388	up	2.49322	up	2.42513	up	Homo sapiens ubiquitin domain containing 1 (UBTD1), mRNA [NM_024954]	ubiquitin domain containing 1	CACAGCAGGTCCCTGTGGACAGACATATCTGCATATTTATCAATAAAGCCTTTTGCTCCT
	A_33_P3417626	ENHO	1.56282e-27	3.69694e-30	-2.19705	down	-5.02558	down	-5.37007	down	Homo sapiens energy homeostasis associated (ENHO), mRNA [NM_198573]	energy homeostasis associated	TAGGCCCTCTAGGCTGGGGAAGCAAACTGGAACCCATGGCAATAATAGGAGGGTGTCCAG
	A_33_P3424636		1.59587e-27	3.80657e-30	-4.48679	down	-5.01629	down	-4.3775	down	T cell receptor beta variable 4-2 [Source:HGNC Symbol;Acc:HGNC:12216] [ENST00000390392]		TTAAAGAACAGACTGAAAACAACAGTGTGCCAAGTCGCTTCTCACCTGAATGCCCCAACA
	A_33_P3350726	PPARG	2.03057e-27	4.88348e-30	8.09204	up	11.4868	up	9.04589	up	Homo sapiens peroxisome proliferator-activated receptor gamma (PPARG), transcript variant 3, mRNA [NM_138711]	peroxisome proliferator-activated receptor gamma	ACAATCAGATTGAAGCTTATCTATGACAGATGTGATCTTAACTGTCGGATCCACAAAAAA
	A_23_P119943	IGFBP2	2.34503e-27	5.68598e-30	8.84973	up	19.1688	up	10.1974	up	Homo sapiens insulin-like growth factor binding protein 2, 36kDa (IGFBP2), mRNA [NM_000597]	insulin-like growth factor binding protein 2, 36kDa	GGAGGGGGAAGAGAAATTTTTATTTTTGAACCCCTGTGTCCCTTTTGCATAAGATTAAAG
	A_23_P8640	GPER1	2.37951e-27	5.86341e-30	9.97989	up	8.5855	up	6.42979	up	Homo sapiens G protein-coupled estrogen receptor 1 (GPER1), transcript variant 3, mRNA [NM_001039966]	G protein-coupled estrogen receptor 1	AACAGCTGGGGACAACTGCGGTGATGATGTAAAAACCTTCCCATAAAATGTAAGAAAAGC
	A_33_P3278362	ANKRD2	2.37951e-27	5.86004e-30	5.83668	up	6.55113	up	7.01254	up	Homo sapiens ankyrin repeat domain 2 (stretch responsive muscle) (ANKRD2), transcript variant 1, mRNA [NM_001291218]	ankyrin repeat domain 2 (stretch responsive muscle)	AGCTAACTGAGGGCCCAGCCTTTTTTCTGCATGATCCAGGAGCACATACCACAAACTACC
	A_23_P321307	ADAMTS2	2.59676e-27	6.44992e-30	9.10754	up	12.0603	up	11.8918	up	Homo sapiens ADAM metallopeptidase with thrombospondin type 1 motif, 2 (ADAMTS2), transcript variant 2, mRNA [NM_021599]	ADAM metallopeptidase with thrombospondin type 1 motif, 2	GAACATTGTCAATGAAATCTACCATGACGAGTCCTTGGGTGCCCACATCAACGTGGTCCT
	A_23_P101707	PLIN3	2.70841e-27	6.78064e-30	3.87189	up	3.03532	up	2.69696	up	Homo sapiens perilipin 3 (PLIN3), transcript variant 1, mRNA [NM_005817]	perilipin 3	TCTCTATAATGCAGCTGTGCTCTGGAGTCCTCAACCCGGGGCTCATTTCAAACTTATTTT
	A_33_P3217704	FAM214B	2.74935e-27	6.93732e-30	7.81231	up	5.16523	up	4.88421	up	Homo sapiens family with sequence similarity 214, member B (FAM214B), mRNA [NM_025182]	family with sequence similarity 214, member B	TGGGCTGAGGGGAACAAGCATTTGCTGAAACTTGAAAAAACAAAGCAAATCAAAAACAGG
	A_23_P137381	ID3	2.78671e-27	7.08653e-30	-3.59505	down	-3.5057	down	-3.33441	down	Homo sapiens inhibitor of DNA binding 3, dominant negative helix-loop-helix protein (ID3), mRNA [NM_002167]	inhibitor of DNA binding 3, dominant negative helix-loop-helix protein	AGCCAGGTGGAAATCCTACAGCGCGTCATCGACTACATTCTCGACCTGCAGGTAGTCCTG
	A_24_P286114	SLC1A3	2.84657e-27	7.29487e-30	13.686	up	11.0768	up	8.60129	up	Homo sapiens solute carrier family 1 (glial high affinity glutamate transporter), member 3 (SLC1A3), transcript variant GLAST, mRNA [NM_004172]	solute carrier family 1 (glial high affinity glutamate transporter), member 3	GTGGCTGTCCTCTTAAGACACTAGTAGAGCAAAGACTTAATCATATCAACTTAATTCTGT
	A_33_P3397443	PKMYT1	3.35221e-27	8.65675e-30	2.30909	up	4.64689	up	3.77893	up	Homo sapiens protein kinase, membrane associated tyrosine/threonine 1 (PKMYT1), transcript variant 2, mRNA [NM_182687]	protein kinase, membrane associated tyrosine/threonine 1	TCGGGAACTCCCATGGTCTTCTCTGCCTGGCCGTGTCTAATAAAAAGTATTTGAACCTTG
	A_23_P74001	S100A12	4.00433e-27	1.04197e-29	4.66828	up	4.34984	up	3.75478	up	Homo sapiens S100 calcium binding protein A12 (S100A12), mRNA [NM_005621]	S100 calcium binding protein A12	TGAAGGCTTTTTACCCAGCAATGTCCTCAATGAGGGTCTTTTCTTTCCCTCACCAAAACC
	A_33_P3249731	XLOC_l2_000001	4.32191e-27	1.13582e-29	12.5118	up	6.93093	up	6.71387	up	BROAD Institute lincRNA (XLOC_l2_000001), lincRNA [TCONS_l2_00001922]		ACTTGCAGCTCTTCCAGGCCCACTTCCAGGCCGACTTGAGGACGACTTAGGCCTGCAGAG
	A_33_P3313055	NOTCH3	4.32191e-27	1.14165e-29	5.07983	up	6.47731	up	3.29428	up	Homo sapiens notch 3 (NOTCH3), mRNA [NM_000435]	notch 3	TAATATGGCTTCTGGTCAAAATCCCTGTGTAGCTGAATTCCCAAGCCCTGCATTGTACAG
	A_33_P3282261	XLOC_l2_000001	4.8771e-27	1.29792e-29	11.2051	up	6.83435	up	6.88394	up	BROAD Institute lincRNA (XLOC_l2_000001), lincRNA [TCONS_l2_00000001]		ACTGGAGATCAAGTTCTGCGCCTGAAGAGGCTGCCAAAAGTCAAAAGCGGGGCCTGGGAA
	A_23_P103897	SPATA1	4.95613e-27	1.32872e-29	2.78447	up	2.94953	up	2.71875	up	spermatogenesis associated 1 [Source:HGNC Symbol;Acc:HGNC:14682] [ENST00000431031]	spermatogenesis associated 1	CTACCAGATCACCCTTCACTTCCTTGTCAACCTGTTCTTTCTTCAGGAATAACTGATATA
	A_23_P153964	INHBB	5.07037e-27	1.37934e-29	12.2395	up	10.2616	up	13.9325	up	Homo sapiens inhibin, beta B (INHBB), mRNA [NM_002193]	inhibin, beta B	GTGAACTATGCAATTTAAAGGGTTGACCCACACTAGACGAAACTGGACTCGTACGACTCT
	A_33_P3383233	NDRG2	5.07037e-27	1.37734e-29	-1.91659	down	-3.41325	down	-3.12015	down	Homo sapiens NDRG family member 2 (NDRG2), transcript variant 11, mRNA [NM_001282213]	NDRG family member 2	TATGGACCTACGTGAATGTGTGTCAGGGGGAGACTTGCTGGTGGGTTAGTGGTCCTCAGG
	A_33_P3402646		6.86768e-27	1.88182e-29	-6.77019	down	-6.87791	down	-5.91119	down	T cell receptor alpha variable 8-3 [Source:HGNC Symbol;Acc:HGNC:12148] [ENST00000390435]		TTTCAGGAGACACTCTGGTTCAAGGCATTAAAGGCTTTGAGGCTGAATTTAAGAGGAGTC
	A_33_P3215948	MPZL2	7.91267e-27	2.19641e-29	2.14804	up	-1.48118	down	-1.40195	down	Homo sapiens myelin protein zero-like 2 (MPZL2), transcript variant 1, mRNA [NM_005797]	myelin protein zero-like 2	GTAATATGGGCCTGTTGTTTAGTGTCTCCTTCCTAAAGAGCACTTTTGTATTGTAATTTA
	A_23_P61960	ATP6V0E2	7.91267e-27	2.19935e-29	-3.53952	down	-3.5835	down	-3.41919	down	Homo sapiens ATPase, H+ transporting V0 subunit e2 (ATP6V0E2), transcript variant 1, mRNA [NM_145230]	ATPase, H+ transporting V0 subunit e2	TGAAGCAGAGAAACATTCACACACAAAAAGCAACATAGTCATGTGGGTCCAGATGGCCTC
	A_24_P636974	lnc-SEPT7L-1	8.39372e-27	2.39924e-29	34.7149	up	13.6049	up	13.5302	up	LNCipedia lincRNA (lnc-SEPT7L-1), lincRNA [lnc-SEPT7L-1:1]	lnc-SEPT7L-1:1	GTGGGAGGGGCCGGTGTGAGGCAAGGCTCACGCTGACCTCTCTCGGCGTGGGAGGGGCCG
	A_23_P101992	MARCO	8.39372e-27	2.38265e-29	8.14941	up	6.80495	up	4.14713	up	Homo sapiens macrophage receptor with collagenous structure (MARCO), mRNA [NM_006770]	macrophage receptor with collagenous structure	TGGCTGGATAATGTTCAGTGTCGGGGCACGGAGAGTACCCTGTGGAGCTGCACCAAGAAT
	A_33_P3369760	GLIPR2	8.39372e-27	2.39822e-29	2.63241	up	1.87286	up	1.82651	up	Homo sapiens GLI pathogenesis-related 2 (GLIPR2), transcript variant 3, mRNA [NM_001287011]	GLI pathogenesis-related 2	ATGTAATGGGAAGGTGGCAGACTTAAGAACGTGGATATGAAGTGCCTAGAACCACCACAA
	A_21_P0014847	CYB561D2	8.39372e-27	2.36023e-29	-3.4749	down	-3.74783	down	-3.33787	down	Homo sapiens cytochrome b561 family, member D2 (CYB561D2), transcript variant 4, non-coding RNA [NR_111913]	cytochrome b561 family, member D2	ACTGCTTGGAGTCTGGAGTCACTTTCTCCATGAGCTCAATAAAGTTTTTCAGGAACTCGG
	A_23_P200507	CNIH4	9.10948e-27	2.62179e-29	3.19213	up	2.91444	up	2.45718	up	Homo sapiens cornichon family AMPA receptor auxiliary protein 4 (CNIH4), transcript variant 1, mRNA [NM_014184]	cornichon family AMPA receptor auxiliary protein 4	TGGTTGAAGTCAGCCTACACTACAGTGCACAGTTGAGGAGCCAGAGACTTCTTAAATCAT
	A_23_P117582	JDP2	9.43874e-27	2.73516e-29	5.11869	up	3.71402	up	3.45939	up	Homo sapiens Jun dimerization protein 2 (JDP2), transcript variant 1, mRNA [NM_130469]	Jun dimerization protein 2	GGGGTGCATTTCCATCCTTGTAAACCCTTCATAGTACTCAGTCCTGTATCGCTCAGTAAA
	A_24_P254833		9.60797e-27	2.80315e-29	-7.36386	down	-6.69477	down	-6.72827	down	T cell receptor beta variable 7-9 [Source:HGNC Symbol;Acc:HGNC:12243] [ENST00000612787]		TCAGGTGTGATCCAATTTCTGAACACAACCGCCTTTATTGGTACCGACAGACCCTGGGGC
	A_24_P346762	FAM214B	9.74533e-27	2.86243e-29	3.19731	up	2.73315	up	2.40474	up	Homo sapiens family with sequence similarity 214, member B (FAM214B), mRNA [NM_025182]	family with sequence similarity 214, member B	AAGAGACCCTTCAGGCTTGAATTAAAGCCCTCACCATGCTCACGCCCAAATGGATTATTT
	A_19_P00322181	lnc-C9orf50-2	1.45617e-26	4.30583e-29	6.20939	up	3.18005	up	4.35396	up	ALU1_HUMAN (P39188) Alu subfamily J sequence contamination warning entry, partial (6%) [THC2579385]	lnc-C9orf50-2:1	ACTCGCACTGTCTGACATTTCCATCGATGGCCTGCATGAGGAATGGGCGGTGAGCATCCT
	A_32_P121085	DOK3	1.53599e-26	4.57212e-29	4.40684	up	3.53955	up	3.52591	up	Homo sapiens docking protein 3 (DOK3), transcript variant 2, mRNA [NM_001144875]	docking protein 3	TACACAAAGAATCTCCTGAAAGCCTGTAAAAATGTCCATGCATGTTCTGTGAGTGATCTA
	A_24_P143492	BCAS4	1.57726e-26	4.72607e-29	-3.8592	down	-3.68933	down	-3.39913	down	Homo sapiens breast carcinoma amplified sequence 4 (BCAS4), transcript variant 3, mRNA [NM_001010974]	breast carcinoma amplified sequence 4	GATACTTCACAGATCCTGGAGGAAAACATCCCAGTCCTTAAGGCCAAACTGACAGAAATG
	A_23_P203888	MMP19	1.6473e-26	4.96841e-29	3.56929	up	3.40067	up	3.2677	up	Homo sapiens matrix metallopeptidase 19 (MMP19), transcript variant 1, mRNA [NM_002429]	matrix metallopeptidase 19	AATGGTGGAGGGAGATGCCTGGGTCCTGTTCTTCCTACATAAAATGCAAGAAAACAGCAT
	A_24_P270144	CD63	1.76239e-26	5.35025e-29	3.79093	up	3.25246	up	2.53834	up	Homo sapiens CD63 molecule (CD63), transcript variant 3, mRNA [NM_001257389]	CD63 molecule	TGTGGGCTGTGGGATTAATTTCAACGAGAAGGCGATCCATAAGGAGGGCTGTGTGGAGAA
	A_23_P256641	KCNE5	1.82872e-26	5.58767e-29	7.1442	up	5.62485	up	6.41948	up	Homo sapiens potassium channel, voltage gated subfamily E regulatory beta subunit 5 (KCNE5), mRNA [NM_012282]	potassium channel, voltage gated subfamily E regulatory beta subunit 5	CCTCTATTGATTCAGTTGTTATTGCAGTGTCTGCTTCATCCGTGGAACTTGAGGCTCAGA
	A_23_P8083	LY6G6C	1.85036e-26	5.69027e-29	5.45468	up	8.49576	up	8.59413	up	Homo sapiens lymphocyte antigen 6 complex, locus G6C (LY6G6C), mRNA [NM_025261]	lymphocyte antigen 6 complex, locus G6C	CTACTTGAGGAGGGATTGGGATCTGGGCCTGAAATGGGGCTTCTGTGTTGTCCCCAGTGA
	A_23_P56356	PLB1	2.24285e-26	6.98568e-29	9.0205	up	6.62306	up	5.42367	up	Homo sapiens phospholipase B1 (PLB1), transcript variant 1, mRNA [NM_153021]	phospholipase B1	GGACAGTCACAACTTCTTGGGGCCTGGGCTTCTTCCAGGCCTATGCTCCTGGAATGGAAA
	A_23_P92499	TLR2	2.24285e-26	6.94179e-29	3.77946	up	2.90258	up	3.34417	up	Homo sapiens toll-like receptor 2 (TLR2), mRNA [NM_003264]	toll-like receptor 2	AAGTCCTAGGTTCCCATATTTAAGACCAGTCTTTGTCTAGTTGGGATCTTTATGTCACTA
	A_33_P3266022		2.42927e-26	7.61421e-29	8.6171	up	4.59667	up	4.95674	up			TTTCTTGGGCCCCATGATCTCGTGGGTCGTGGCCTTGCATACTGTCTTGGATACGGCAGA
	A_24_P68908	LOC344887	2.43801e-26	7.72279e-29	8.90125	up	6.58057	up	8.77353	up	Homo sapiens NmrA-like family domain containing 1 pseudogene (LOC344887), non-coding RNA [NR_033752]	NmrA-like family domain containing 1 pseudogene	CATCATATTGTAATCGTCTTATTTGCTAGTTTTCTTCCTTACTGTGAGTGACTAACAGTC
	A_24_P125561	SIGLEC9	2.43801e-26	7.73774e-29	3.76994	up	3.50553	up	3.17027	up	Homo sapiens sialic acid binding Ig-like lectin 9 (SIGLEC9), transcript variant 2, mRNA [NM_014441]	sialic acid binding Ig-like lectin 9	CTCTCAGCAGGTCTACCTGAACGTCTCCCTGCAGAGCAAAGCCACATCAGGAGTGACTCA
	A_24_P404487	ZNF506	2.93712e-26	9.3797e-29	-3.59352	down	-3.03321	down	-2.93051	down	zinc finger protein 506 [Source:HGNC Symbol;Acc:HGNC:23780] [ENST00000443905]	zinc finger protein 506	ACCTTGCCTGTAAAACAAAACCTATCTAGTGTCTGCATAGGTTTCCACTTCTTGTCCCCA
	A_23_P250347	CAMK4	2.99606e-26	9.62699e-29	-5.33567	down	-5.14423	down	-4.46866	down	Homo sapiens calcium/calmodulin-dependent protein kinase IV (CAMK4), mRNA [NM_001744]	calcium/calmodulin-dependent protein kinase IV	AGGTGCAAGCCTTAGAGAAAGTTAAAGGTGCAGATATAAATGCTGAAGAGGCCCCCAAAA
	A_33_P3385909	UBASH3A	3.26607e-26	1.0559e-28	-4.53979	down	-5.00471	down	-4.16182	down	Homo sapiens ubiquitin associated and SH3 domain containing A (UBASH3A), transcript variant 3, mRNA [NM_001243467]	ubiquitin associated and SH3 domain containing A	GTGTGCAAAGAACAGAGCTCATGAGGTCTTCCCACACGTGACACTCTGTGACTTCTTCAC
	A_23_P113825	NACC2	3.74788e-26	1.21905e-28	3.03473	up	2.30807	up	2.45378	up	Homo sapiens NACC family member 2, BEN and BTB (POZ) domain containing (NACC2), mRNA [NM_144653]	NACC family member 2, BEN and BTB (POZ) domain containing	GCCACTTACCTACTGAACTGCTACTGTTGCCTGAGAAAAATGTGATTTTTATTCTGCTTG
	A_23_P30950	SLC26A8	4.2331e-26	1.38522e-28	6.70075	up	9.72461	up	10.9577	up	Homo sapiens solute carrier family 26 (anion exchanger), member 8 (SLC26A8), transcript variant 1, mRNA [NM_052961]	solute carrier family 26 (anion exchanger), member 8	TCCTCTGAGTTAAGCATCGATGAATCCGAGACAGTGATACGGGAAACCTACTCAGAAACA
	A_19_P00803864	FAM105A	4.29091e-26	1.4126e-28	3.24795	up	2.78057	up	2.64301	up	Homo sapiens family with sequence similarity 105, member A (FAM105A), mRNA [NM_019018]	family with sequence similarity 105, member A	CTGGTGAAAATGGTGTTTGTTGTAACATCTTGGTATCATTGTGGGTAAGTAGAACAAATA
	A_23_P50638	LRG1	4.45315e-26	1.47478e-28	8.20619	up	7.26786	up	5.68444	up	Homo sapiens leucine-rich alpha-2-glycoprotein 1 (LRG1), mRNA [NM_052972]	leucine-rich alpha-2-glycoprotein 1	GTTTCATCCATCCATGCTTCCTAGAACACACGATGGGCTTTCCTTACCCATGCCCAAGGT
	A_33_P3292769	NFAM1	5.31579e-26	1.77095e-28	3.7727	up	3.00421	up	3.12942	up	Homo sapiens NFAT activating protein with ITAM motif 1 (NFAM1), mRNA [NM_145912]	NFAT activating protein with ITAM motif 1	CATATGTGGGTGACAGAAGCATATGTTACAGTGAAACATTAAAACTACAGCAAAGTGAAA
	A_33_P3240532	RGL1	5.45168e-26	1.82697e-28	7.5537	up	4.92164	up	3.18703	up	Homo sapiens ral guanine nucleotide dissociation stimulator-like 1 (RGL1), transcript variant 1, mRNA [NM_015149]	ral guanine nucleotide dissociation stimulator-like 1	TTTGGTTAAACTAATAAACTAGTTTGGGACTTGGCTGGCATGTGCTGCCAGACCCAAAGG
	A_23_P4096	CA4	5.4599e-26	1.85125e-28	11.7271	up	15.5727	up	12.3399	up	Homo sapiens carbonic anhydrase IV (CA4), mRNA [NM_000717]	carbonic anhydrase IV	TAATATCCCCAAACCTGAGATGAGCACTACGATGGCAGAGAGCAGCCTGTTGGACCTGCT
	A_33_P3272563	NMT2	5.4599e-26	1.84449e-28	-3.96439	down	-4.29149	down	-4.42554	down	Homo sapiens N-myristoyltransferase 2 (NMT2), mRNA [NM_004808]	N-myristoyltransferase 2	CCTCACGGTGACAGTTACACTGCTCCTTTAAAGAGTCATTTACATAATTTGTTATCAAAT
	A_21_P0013278	LOC728743	5.52033e-26	1.88262e-28	-4.76374	down	-3.78647	down	-3.71089	down	Homo sapiens zinc finger protein pseudogene (LOC728743), non-coding RNA [NR_027237]	zinc finger protein pseudogene	GAAAACAGATAACTGACGTAGACTCAAAAACCCCAAGCAATTTCAGGAGCCACTGGACTC
	A_23_P141345	MPP3	5.61833e-26	1.92712e-28	4.09441	up	1.55816	up	1.58385	up	Homo sapiens membrane protein, palmitoylated 3 (MAGUK p55 subfamily member 3) (MPP3), transcript variant 1, mRNA [NM_001932]	membrane protein, palmitoylated 3 (MAGUK p55 subfamily member 3)	TAAGTGGGAAGTCTTGTTTGTTGTTGGTTTTTGTCTGTTGTTTTTCACTGCACCTCTTTG
	A_23_P10025	NELL2	6.37065e-26	2.19773e-28	-5.06095	down	-8.77287	down	-7.52936	down	Homo sapiens NEL-like 2 (chicken) (NELL2), transcript variant 2, mRNA [NM_006159]	NEL-like 2 (chicken)	ACATCACCATGTAGAAGAATGGGCGTACAGTATATACCGTGACATCCTGAACCCTGGATA
	A_33_P3271430	MAP3K3	6.44707e-26	2.2368e-28	2.92798	up	2.1057	up	2.18965	up	Homo sapiens mitogen-activated protein kinase kinase kinase 3 (MAP3K3), transcript variant 1, mRNA [NM_203351]	mitogen-activated protein kinase kinase kinase 3	TGCAGTGCAAAGCCAGGCCAGTGTTGCGCATTACTTACAATAAAAGGGATCATTTATATC
	A_32_P157213		7.0007e-26	2.44355e-28	14.9065	up	43.0016	up	19.3993	up	CD177 molecule pseudogene 1 [Source:HGNC Symbol;Acc:HGNC:34508] [ENST00000606252]		GCATTCAGGGCTGTGTGGCCCAACATTCCAGCTCCTTGTTGAACCACACCAGACAAATTG
	A_33_P3225690	ZNF516	7.0007e-26	2.45648e-28	3.1574	up	2.96435	up	2.81757	up	Homo sapiens zinc finger protein 516 (ZNF516), mRNA [NM_014643]	zinc finger protein 516	GTGACCCAGTCCTGTTTCTCTGTGTTTTAGTTATTAAAAAGAAATTCTGTACCCAAAGTG
	A_21_P0010326	lnc-ICOSLG-6	7.10043e-26	2.50548e-28	-1.58323	down	-2.71646	down	-2.42096	down	LNCipedia lincRNA (lnc-ICOSLG-6), lincRNA [lnc-ICOSLG-6:5]	lnc-ICOSLG-6:5	CGGTCTCACGGCCATTGGTGCAGAGCTGGGATCCACGACCAGATTCTACCAATTAAAAAA
	A_33_P3413098	LOC100129550	7.88121e-26	2.79652e-28	4.83815	up	3.20843	up	3.20336	up	Homo sapiens uncharacterized LOC100129550 (LOC100129550), long non-coding RNA [NR_024618]	uncharacterized LOC100129550	GGTTATGTTGACATTATGGTTACTGTGCTTGTGGTTTTGCAATAAACATGTATTGAAAGC
	A_33_P3402091	MERTK	9.27548e-26	3.30954e-28	7.97026	up	6.62551	up	3.89968	up	Homo sapiens MER proto-oncogene, tyrosine kinase (MERTK), mRNA [NM_006343]	MER proto-oncogene, tyrosine kinase	TAAAGTTGTATAACTGATTAATTTTCTGATATGGCTTCCTAATAAAATATGAATAAGGAA
	A_23_P132718	SEMA3B	9.39779e-26	3.3717e-28	5.65299	up	6.06699	up	6.68931	up	Homo sapiens sema domain, immunoglobulin domain (Ig), short basic domain, secreted, (semaphorin) 3B (SEMA3B), transcript variant 1, mRNA [NM_004636]	sema domain, immunoglobulin domain (Ig), short basic domain, secreted, (semaphorin) 3B	TTGGGTAGTGAGCAGTGAGCAGAAAGCTGTGAACAGGCTGGGCTGCTGGAGGTGGGGCGA
	A_33_P3233871	F12	1.00247e-25	3.61639e-28	7.77554	up	5.16405	up	4.97419	up	Homo sapiens coagulation factor XII (Hageman factor) (F12), mRNA [NM_000505]	coagulation factor XII (Hageman factor)	TGCGGCCAGCTCCGCGCCAGGATGGCGCAGGAACTCAATAAAGTGCTTTGAAAATGCTGA
	A_23_P101972	CAPN13	1.05187e-25	3.81532e-28	7.13652	up	13.612	up	10.7239	up	Homo sapiens calpain 13 (CAPN13), mRNA [NM_144575]	calpain 13	CTCTGAGTCCCCTGTCACCAGTTGGATTCATTTCTTGGAAGAGCCAGAATGAGCCACTTT
	A_21_P0009510	lnc-KCNG2-1	1.17338e-25	4.32544e-28	7.11202	up	11.4218	up	8.43745	up	LNCipedia lincRNA (lnc-KCNG2-1), lincRNA [lnc-KCNG2-1:1]	lnc-KCNG2-1:1	AGAACTGAGTGAGCAGCTCCTCACGGAAGGTCGAAGCCGCTGGTCTCAGCTGTGTTTTCA
	A_23_P45475	GLA	1.17338e-25	4.30577e-28	3.16088	up	2.91486	up	2.63363	up	Homo sapiens galactosidase, alpha (GLA), mRNA [NM_000169]	galactosidase, alpha	ATCACACAGCTCCTCCCTGTGAAAAGGAAGCTAGGGTTCTATGAATGGACTTCAAGGTTA
	A_23_P410859	ZSWIM6	1.17338e-25	4.31533e-28	3.3907	up	2.45967	up	2.46235	up	Homo sapiens zinc finger, SWIM-type containing 6 (ZSWIM6), mRNA [NM_020928]	zinc finger, SWIM-type containing 6	CAAGCCTTAGCATTAAGAATATACAATATGCCGGAATTGGGGTTCGTGCCTCCTAGCCTA
	A_23_P121716	ANXA3	1.29435e-25	4.79692e-28	13.3266	up	12.7731	up	9.99428	up	Homo sapiens annexin A3 (ANXA3), mRNA [NM_005139]	annexin A3	TGGACATTCGAACAGAGTTCAAGAAGCATTATGGCTATTCCCTATATTCAGCAATTAAAT
	A_33_P3380897	ATP6V1C1	1.38022e-25	5.14236e-28	3.94443	up	2.79986	up	2.4739	up	Homo sapiens ATPase, H+ transporting, lysosomal 42kDa, V1 subunit C1 (ATP6V1C1), mRNA [NM_001695]	ATPase, H+ transporting, lysosomal 42kDa, V1 subunit C1	TTGTGTACACCGGGGCTTGTACTTGGGGAATTTAATAAAAATGCTCATTACCAAGCTCCA
	A_23_P166306	CBS	1.57614e-25	5.93445e-28	17.4949	up	11.0936	up	12.2433	up	Homo sapiens cystathionine-beta-synthase (CBS), transcript variant 1, mRNA [NM_000071]	cystathionine-beta-synthase	GCTGATCGACTTTGTGTCTCTGTTGTCTAAAATAGGTTTTCCCTGTTCTGGACATTTCAT
	A_19_P00322621	LINC01503	1.57614e-25	5.91466e-28	2.76956	up	2.5015	up	2.14442	up	Homo sapiens long intergenic non-protein coding RNA 1503 (LINC01503), transcript variant 1, long non-coding RNA [NR_120685]	long intergenic non-protein coding RNA 1503	TTGTCTTGGTGTCACCCTGCCTGAGCTGGCCCCAACCACAGTAGCAACAGTGATGCTGAT
	A_21_P0005438	lnc-RP11-1220K2.2.1-1	1.60513e-25	6.07523e-28	17.9759	up	26.1768	up	23.0992	up	LNCipedia lincRNA (lnc-RP11-1220K2.2.1-1), lincRNA [lnc-RP11-1220K2.2.1-1:2]	lnc-RP11-1220K2.2.1-1:2	ACCCATGGTCATTACCAAATCTGGTCATTTGGGTACTATTGTAGGTTTAACCCTAGGGCA
	A_21_P0010069	lnc-RP11-93B14.6.1-4	1.91199e-25	7.27435e-28	5.64804	up	5.5057	up	5.27878	up	LNCipedia lincRNA (lnc-RP11-93B14.6.1-4), lincRNA [lnc-RP11-93B14.6.1-4:1]	lnc-RP11-93B14.6.1-4:1	AGGAGTCCTACAGTCTCACAGTGCCACCCAGCAGTGCCAACCCAGCAAAGGTCTTGAGAA
	A_19_P00320449	LINC00963	2.05079e-25	7.84286e-28	2.90115	up	1.69149	up	2.03922	up	long intergenic non-protein coding RNA 963 [Source:HGNC Symbol;Acc:HGNC:48716] [ENST00000444184]	long intergenic non-protein coding RNA 963	TCCATCGGTGAGCTCCCGCCTGCCACCTCTGGGCCTGCATTGCGGTGATAGGGCCAAGGG
	A_23_P137689	OLFML2B	2.11433e-25	8.16925e-28	4.07202	up	3.9733	up	2.80759	up	Homo sapiens olfactomedin-like 2B (OLFML2B), transcript variant 2, mRNA [NM_015441]	olfactomedin-like 2B	ATGTGCTGGTCTCATCCTCCCCAGTTTATATTTTTGTGCAAATGAACTTCTCCTTTTGAC
	A_23_P4662	BCL3	2.11433e-25	8.13819e-28	5.77616	up	3.39609	up	3.14364	up	Homo sapiens B-cell CLL/lymphoma 3 (BCL3), mRNA [NM_005178]	B-cell CLL/lymphoma 3	TACCAGATAACTGAGGAGGGGAGAGGTGGGCCGTAACGGGCACGGATCACGATGTAAATT
	A_23_P37484	CHSY1	2.15748e-25	8.37847e-28	3.27367	up	1.78809	up	1.67547	up	Homo sapiens chondroitin sulfate synthase 1 (CHSY1), mRNA [NM_014918]	chondroitin sulfate synthase 1	CAGTGATAGACTTGCCATTTTAATACACGTCATTGGAGGGCTGCGTATTTGTAAATAGCC
	A_33_P3284557	ZAK	2.24426e-25	8.75972e-28	3.91556	up	2.8962	up	3.14138	up	Homo sapiens sterile alpha motif and leucine zipper containing kinase AZK (ZAK), transcript variant 1, mRNA [NM_016653]	sterile alpha motif and leucine zipper containing kinase AZK	GACCACCGTGGATGGAGAAACTTTTGATGAATTGAACTACATAGCTTTTCTAAGCAGGTT
	A_23_P81441	DCANP1	2.33109e-25	9.14458e-28	-2.51393	down	-3.70006	down	-5.26726	down	Homo sapiens dendritic cell-associated nuclear protein (DCANP1), mRNA [NM_130848]	dendritic cell-associated nuclear protein	AACCCAGCCCAGTTAAGAGGAGATGCCGAATTTAATGAACCCTATTTGAATTGCAGGGCT
	A_23_P9883	NLRP3	2.33224e-25	9.19508e-28	3.67439	up	1.69987	up	1.69971	up	Homo sapiens NLR family, pyrin domain containing 3 (NLRP3), transcript variant 3, mRNA [NM_001079821]	NLR family, pyrin domain containing 3	TGTTGTTGTCATCACAGCGCCTCAGTTAGAGGATGTTCCTCTGGTGACCTCATGTAATTA
	A_33_P3399571	VNN1	2.37121e-25	9.39545e-28	5.61267	up	6.71143	up	5.60559	up	Homo sapiens vanin 1 (VNN1), mRNA [NM_004666]	vanin 1	GAAAGCCCATAATGTATTTAGAAACAGGAATCCTCAGAGCAATTCTCTGTATTCTCATAT
	A_33_P3397599	LILRA6	2.39793e-25	9.54861e-28	4.00097	up	4.91958	up	3.74878	up	Homo sapiens leukocyte immunoglobulin-like receptor, subfamily A (with TM domain), member 6 (LILRA6), transcript variant 2, non-coding RNA [NR_104098]	leukocyte immunoglobulin-like receptor, subfamily A (with TM domain), member 6	CCAGATTCATCTGTGTTGCTGAACATGGTACAATTTCCTTCTTTTTATGCCTGAATATTA
	A_33_P3363168	SSH2	2.40089e-25	9.60774e-28	4.76697	up	2.85059	up	2.83013	up	Homo sapiens slingshot protein phosphatase 2 (SSH2), transcript variant 1, mRNA [NM_001282129]	slingshot protein phosphatase 2	CTGTTTTTAAATGTGAACTTGTGCGCAAATGTGCAGATTCAATGTTCTTGTTACAGATTG
	A_24_P48539	SIGLEC5	2.55598e-25	1.02787e-27	4.33736	up	4.48205	up	3.53075	up	Homo sapiens sialic acid binding Ig-like lectin 5 (SIGLEC5), mRNA [NM_003830]	sialic acid binding Ig-like lectin 5	GAAGAACAAAAGGAGCTCCATTATGCCTCCCTTAGTTTTTCTGAGATGAAGTCGAGGGAG
	A_23_P346376	P2RY10	2.7782e-25	1.12417e-27	-7.55304	down	-4.90181	down	-5.61604	down	Homo sapiens purinergic receptor P2Y, G-protein coupled, 10 (P2RY10), transcript variant 1, mRNA [NM_014499]	purinergic receptor P2Y, G-protein coupled, 10	ATGTATGCCAGCATTTGTTTCCTGACGTGCATCAGTCTTCAAAGGTGCTTTTTTCTCCTC
	A_24_P193093	KLRK1	2.7782e-25	1.12819e-27	-9.57729	down	-8.13211	down	-8.03128	down	Homo sapiens killer cell lectin-like receptor subfamily K, member 1 (KLRK1), mRNA [NM_007360]	killer cell lectin-like receptor subfamily K, member 1	CCCATGTCCTAAAAACTGGATATGTTACAAAAATAACTGCTACCAATTTTTTGATGAGAG
	A_33_P3344423	NCR3	2.79753e-25	1.14156e-27	-5.8484	down	-4.56397	down	-4.10363	down	Homo sapiens natural cytotoxicity triggering receptor 3 (NCR3), transcript variant 3, mRNA [NM_001145467]	natural cytotoxicity triggering receptor 3	ACTGGGACATCTTCCGACATGGCCTGGATGCTGTTGCTCATCTTGATCATGGTCCATCCA
	A_23_P162300	IRAK3	2.91711e-25	1.1961e-27	3.9701	up	6.15489	up	5.22592	up	Homo sapiens interleukin-1 receptor-associated kinase 3 (IRAK3), transcript variant 1, mRNA [NM_007199]	interleukin-1 receptor-associated kinase 3	TTGTCTCATGACCAAATCCACGCTCAATTAGAGCCATTCAAAATTCCTTAAGATCATGGG
	A_24_P65722	LILRB4	3.04958e-25	1.25643e-27	5.8498	up	3.97682	up	3.61896	up	Homo sapiens leukocyte immunoglobulin-like receptor, subfamily B (with TM and ITIM domains), member 4 (LILRB4), transcript variant 1, mRNA [NM_001278426]	leukocyte immunoglobulin-like receptor, subfamily B (with TM and ITIM domains), member 4	TGAAGCCTTCTTCCTCCCAGGAAAGGGGACGTTCAGCTGAGCCGAGTGTGTATACTGCTC
	A_32_P70158	LILRB3	3.40027e-25	1.40762e-27	4.86658	up	4.06953	up	4.0187	up	Homo sapiens leukocyte immunoglobulin-like receptor, subfamily B (with TM and ITIM domains), member 3 (LILRB3), transcript variant 2, mRNA [NM_006864]	leukocyte immunoglobulin-like receptor, subfamily B (with TM and ITIM domains), member 3	GCTGGGAACTTGTGGGACTCACCTGACTCAAAGATGACTAATATCGTCCCATTTTGGAAA
	A_33_P3254900		3.43387e-25	1.4283e-27	6.38606	up	5.13955	up	4.55558	up	capicua transcriptional repressor pseudogene 26 [Source:HGNC Symbol;Acc:HGNC:48834] [ENST00000425003]		TTTCCTCCCAATGGATCCTGCCACCTTCTGGTGCAAGAGACCTGAAAGTGTGGGCGACCT
	A_21_P0000695	LOC731424	3.76819e-25	1.57479e-27	10.5521	up	7.84947	up	8.00794	up	Homo sapiens uncharacterized LOC731424 (LOC731424), long non-coding RNA [NR_037867]	uncharacterized LOC731424	AGTGGTCACTAATTAATCCAGGTGTGGCTAGGAACAGCTGGATACTGATCTGTGTGATGA
	A_33_P3311403	MRVI1	3.76998e-25	1.58296e-27	5.63368	up	3.98808	up	4.11503	up	Homo sapiens murine retrovirus integration site 1 homolog (MRVI1), transcript variant 2, mRNA [NM_130385]	murine retrovirus integration site 1 homolog	GCATTGAACTGTAGAGTGTCACATACCTGAGTTTGAAAATAAAAGCACATTTCCAAACCT
	A_33_P3283713	ABHD14A	3.78437e-25	1.60017e-27	-2.64839	down	-2.6572	down	-2.53224	down	Homo sapiens abhydrolase domain containing 14A (ABHD14A), mRNA [NM_015407]	abhydrolase domain containing 14A	GACCCAGCCAGGACTCCTCATTTCATCTCACAGACACAATAAAAAAGCATATTTGTCCTG
	A_33_P3346972		3.78437e-25	1.60393e-27	-8.46278	down	-6.55452	down	-6.99732	down	T cell receptor beta variable 6-6 [Source:HGNC Symbol;Acc:HGNC:12231] [ENST00000390371]		TTATTCAGTTGGTGCTGGTATCACTGATAAAGGAGAAGTCCCGAATGGCTACAACGTCTC
	A_32_P210202	E2F7	4.13398e-25	1.76025e-27	1.29185	up	4.46496	up	3.95885	up	Homo sapiens E2F transcription factor 7 (E2F7), mRNA [NM_203394]	E2F transcription factor 7	AAGCTGCTGCGCTAGACTTGGATATTTTGGGTAGTGAAGAAGCAATGGCAATCTTGAGTC
	A_21_P0011695	LINC01535	4.22999e-25	1.80947e-27	-2.6641	down	-2.48978	down	-2.57976	down	Homo sapiens long intergenic non-protein coding RNA 1535 (LINC01535), transcript variant 3, long non-coding RNA [NR_110720]	long intergenic non-protein coding RNA 1535	TGGCGGAGTTTTCTAGTCCCTCTTACTTGAAGCATGTCTTTCAGAGCCCGGCACCACCCA
	A_33_P3728979	FAM151B	4.24867e-25	1.82584e-27	3.64699	up	5.45879	up	4.4593	up	Homo sapiens family with sequence similarity 151, member B (FAM151B), mRNA [NM_205548]	family with sequence similarity 151, member B	CTTACTCTGTGGGCATATGTCCTTATAATAGTGCACTTACATAAAAGATTTGGAAAGAAG
	A_21_P0011752		4.4922e-25	1.93935e-27	16.6874	up	37.9838	up	19.1241	up	CD177 molecule pseudogene 1 [Source:HGNC Symbol;Acc:HGNC:34508] [ENST00000606252]		TAAAGCTGCAGCGCTGTTGGGGCTCAAAATTCCCAGAAGACCACCATCCACTCAGCCCCT
	A_23_P9458	POLR1E	4.49341e-25	1.94873e-27	-5.35424	down	-4.3714	down	-4.31124	down	Homo sapiens polymerase (RNA) I polypeptide E, 53kDa (POLR1E), transcript variant 1, mRNA [NM_022490]	polymerase (RNA) I polypeptide E, 53kDa	TTACGGAACTTAATTTCGGATTCTATGAAGGCGAAGATTACTGCATATGTGATCATACTT
	A_21_P0001245	LOC101927851	4.822e-25	2.10074e-27	4.8179	up	4.41123	up	5.13867	up		uncharacterized LOC101927851	GCTGACAGCACTTCCTCATTAAATGCAGAGATCTGCAAAAAGGGAAAATAAAAACACAAG
	A_33_P3412418		5.36632e-25	2.34845e-27	5.3953	up	3.94446	up	3.87283	up	Homo sapiens cDNA FLJ40480 fis, clone TESTI2043313. [AK097799]		GAGTTCTAAATCATGGGACTGTTGACACCCTTTTGAACTAAAGAATTTGTAACAATTTGG
	A_23_P311010	SPRY3	6.16246e-25	2.70901e-27	5.38367	up	3.75603	up	3.7636	up	Homo sapiens sprouty homolog 3 (Drosophila) (SPRY3), mRNA [NM_005840]	sprouty homolog 3 (Drosophila)	CAGAGAGGGCCACTTCTACCCCCCTAGGAGTCATACATCTGGCTACTTATTTGTTAAAAA
	A_33_P3394175		6.84336e-25	3.02183e-27	-4.47129	down	-5.30823	down	-4.40751	down	T cell receptor beta variable 9 [Source:HGNC Symbol;Acc:HGNC:12246] [ENST00000390363]		GGAAACATTCTTGAACGATTCTCCGCACAACAGTTCCCTGACTTGCACTCTGAACTAAAC
	A_24_P652502		6.92557e-25	3.07178e-27	-4.64699	down	-4.57246	down	-4.24026	down	T cell receptor alpha variable 4 [Source:HGNC Symbol;Acc:HGNC:12140] [ENST00000390426]		CATAACCTGTAGCCACAACAACATTGCTACAAATGATTATATCACGTGGTACCAACAGTT
	A_33_P3416347		6.98376e-25	3.11136e-27	-4.172	down	-4.50929	down	-4.20916	down	T cell receptor beta variable 23-1 (non-functional) [Source:HGNC Symbol;Acc:HGNC:12201] [ENST00000390396]		AAGTTCTTCAAGAAACGGAGATGCACAAGAAGCGATTCTCATCTCAATGCCCCAAGAACG
	A_21_P0010236	LOC101928126	7.08768e-25	3.17163e-27	-8.12433	down	-5.18249	down	-5.01348	down	PREDICTED: Homo sapiens uncharacterized LOC101928126 (LOC101928126), ncRNA [XR_254026]	uncharacterized LOC101928126	ACATGACATGAATCATTGTGGTTTTACTCCTGGGTAGAATTGTTTTTCTGTATTGCATTG
	A_23_P214330	SERPINB1	7.62633e-25	3.4277e-27	4.02912	up	3.10095	up	2.62378	up	Homo sapiens serpin peptidase inhibitor, clade B (ovalbumin), member 1 (SERPINB1), transcript variant 1, mRNA [NM_030666]	serpin peptidase inhibitor, clade B (ovalbumin), member 1	TGCCGACCATCCATTCCTTTTCTTTATTCGGCATAATTCCTCAGGTAGCATCCTATTCTT
	A_33_P3356502	RALB	7.96643e-25	3.59626e-27	6.23806	up	3.55816	up	3.40167	up	Homo sapiens v-ral simian leukemia viral oncogene homolog B (RALB), mRNA [NM_002881]	v-ral simian leukemia viral oncogene homolog B	AATTATGATCTGACTGGAAAACAATCCTGTATCCCCTCCCAAAGAATCATGGGCTTTTTT
	A_23_P323196	MDS2	7.96754e-25	3.61247e-27	-7.66405	down	-7.61236	down	-6.55942	down	Homo sapiens myelodysplastic syndrome 2 translocation associated (MDS2), long non-coding RNA [NR_027042]	myelodysplastic syndrome 2 translocation associated	TAATTGGAGTTTTATCAAGCCAGATTTCATGGTGTCTGCTTAATGTTAATCTCTCCAAGC
	A_24_P213788	LEF1-AS1	8.04009e-25	3.66121e-27	-4.61346	down	-6.80932	down	-6.36106	down	Homo sapiens LEF1 antisense RNA 1 (LEF1-AS1), transcript variant 1, long non-coding RNA [NR_029373]	LEF1 antisense RNA 1	AGATTAATGCAGAACAAGGTCGTTAGTCTCATTGTTTATCCAGTTACTAGCTGCATAGAT
	A_32_P355396	TECPR2	8.18602e-25	3.7438e-27	8.2585	up	5.31409	up	5.74283	up	Homo sapiens tectonin beta-propeller repeat containing 2 (TECPR2), transcript variant 1, mRNA [NM_014844]	tectonin beta-propeller repeat containing 2	GTTGCCTGGAGTATATGCCTTTTTGTATCCTTTGAATTTCCAGCCATGTAAATGTATTAT
	A_33_P3331366	TRIM25	8.96572e-25	4.11807e-27	7.41259	up	4.0133	up	4.45168	up	Homo sapiens tripartite motif containing 25 (TRIM25), mRNA [NM_005082]	tripartite motif containing 25	CTGTGTCTTCCTTGGCTTGTGGAGCTGATTTGTATCCTTTATAATAAAACTAATCATAAG
	A_24_P267686		8.97434e-25	4.13972e-27	7.822	up	5.85965	up	5.85242	up			TCACGGCCTTCCCACACTTTGTCCTCACTTGCAACAGGGACTTCTTGTCTGCCTGTTGTA
	A_23_P255884	GSN	8.98782e-25	4.16365e-27	4.35499	up	3.82114	up	3.48278	up	Homo sapiens gelsolin (GSN), transcript variant 2, mRNA [NM_198252]	gelsolin	GTGAAGCAAGGCTTTGAGCCTCCCTCCTTTGTGGGCTGGTTCCTTGGCTGGGATGATGAT
	A_33_P3215803	EMR1	1.00268e-24	4.66473e-27	2.72398	up	2.56896	up	1.64162	up	Homo sapiens egf-like module containing, mucin-like, hormone receptor-like 1 (EMR1), transcript variant 1, mRNA [NM_001974]	egf-like module containing, mucin-like, hormone receptor-like 1	ATACAAGAGGTGGATCACTGGGAAGACGAAGCCCAGCTCCCAGTCCCAGACCTCAAGGAT
	A_23_P255896	TRABD2A	1.01997e-24	4.76527e-27	-9.42089	down	-7.68779	down	-6.64085	down	Homo sapiens TraB domain containing 2A (TRABD2A), transcript variant 2, mRNA [NM_001080824]	TraB domain containing 2A	GCAAGGGGCTCTACGCAGACTACCTCTTCAATGCTATTGCCGGAAACTGGGAGCGCAAGA
	A_23_P17345	MAFB	1.11212e-24	5.2177e-27	4.52039	up	3.62108	up	2.56652	up	Homo sapiens v-maf avian musculoaponeurotic fibrosarcoma oncogene homolog B (MAFB), mRNA [NM_005461]	v-maf avian musculoaponeurotic fibrosarcoma oncogene homolog B	ATTTTTAAGTTCCCATTTGAAATTGCTGGCGCTGCTGGCCGGATGCATTTTTGAGTTTGT
	A_33_P3280841	LINC00671	1.26673e-24	5.99303e-27	6.57259	up	8.31652	up	5.78821	up	Homo sapiens long intergenic non-protein coding RNA 671 (LINC00671), long non-coding RNA [NR_027254]	long intergenic non-protein coding RNA 671	GGTGGAGATGAGTCTGTGGCACCCCCAGGAAGTTTACCAGATTTGCCCCAGAGCTTCTGA
	A_21_P0011694	LINC01535	1.26673e-24	5.98272e-27	-2.64953	down	-2.60692	down	-2.53327	down	Homo sapiens long intergenic non-protein coding RNA 1535 (LINC01535), transcript variant 3, long non-coding RNA [NR_110720]	long intergenic non-protein coding RNA 1535	CTGGCGGAGTTTTCTAGTCCCTCTTACTTGAAGCATGTCTTTCAGAGCCCGGCACCACCC
	A_24_P215475	ZNF10	1.35479e-24	6.43636e-27	-3.19778	down	-2.917	down	-3.06167	down	Homo sapiens zinc finger protein 10 (ZNF10), mRNA [NM_015394]	zinc finger protein 10	CACCATGCCCACATACAACATACCTATCAGAAATGGTTTTCATTAAGGGAGTAGAATAGT
	A_23_P88893	DEF8	1.49517e-24	7.13278e-27	2.26808	up	1.63748	up	1.51988	up	Homo sapiens differentially expressed in FDCP 8 homolog (mouse) (DEF8), transcript variant 2, mRNA [NM_017702]	differentially expressed in FDCP 8 homolog (mouse)	AGAGAGACCAAAGTTCCTGCCTCCGCTGGGCTCACATTCAGATGTGAGCTATCCAGTGTG
	A_33_P3212432		1.5459e-24	7.40526e-27	-6.93748	down	-5.8981	down	-5.52679	down	T cell receptor beta variable 12-4 [Source:HGNC Symbol;Acc:HGNC:12186] [ENST00000617347]		GAGATGGGACAAGAAGTGACTCTGAGATGTAAACCAATTTCAGGACACGACTACCTTTTC
	A_33_P3274127	SPATC1	1.79928e-24	8.66811e-27	7.19793	up	19.138	up	11.2002	up	Homo sapiens spermatogenesis and centriole associated 1 (SPATC1), transcript variant 1, mRNA [NM_198572]	spermatogenesis and centriole associated 1	TTCCCAGAGCGCGTACGGCTCTACGGCTTCACTGTCTCCAACATCCCAGAGAAGATCATC
	A_23_P35782	NAA40	1.79928e-24	8.68996e-27	-3.23036	down	-2.59423	down	-2.24541	down	Homo sapiens N(alpha)-acetyltransferase 40, NatD catalytic subunit (NAA40), transcript variant 1, mRNA [NM_024771]	N(alpha)-acetyltransferase 40, NatD catalytic subunit	GAAAGGACACAGATGCTAAATATTTATTGTCTTAGATCATGGATTCCTGATACCTCTCAC
	A_32_P49668	LOC441081	1.81224e-24	8.78825e-27	10.9473	up	7.9066	up	7.99179	up	Homo sapiens POM121 membrane glycoprotein (rat) pseudogene (LOC441081), non-coding RNA [NR_073404]	POM121 membrane glycoprotein (rat) pseudogene	TTCTATTTACCCATTGTCAATGTGTATAAATTAATCTCAGTCAATTTTATACAATAAAAG
	A_33_P3316786	DACH1	1.86198e-24	9.06619e-27	4.59916	up	4.32216	up	3.84649	up	Homo sapiens dachshund family transcription factor 1 (DACH1), transcript variant 1, mRNA [NM_080759]	dachshund family transcription factor 1	GAACAAGCAGAACAGACGCTAAAACAGGCAGCTTCAACAGATAGTCTCAGGGTCTTAAAT
	A_21_P0010682		1.88474e-24	9.21417e-27	8.86155	up	5.08935	up	5.31738	up			AAGCATGAGCTGGGCCTGGTGAGGTCAACTTGAGAAAGTTCAGGGCCTGGAGAGAAGGCT
	A_33_P3367701	TMEM164	2.05269e-24	1.00757e-26	2.19611	up	2.59615	up	2.81728	up	Homo sapiens transmembrane protein 164 (TMEM164), transcript variant 2, mRNA [NM_032227]	transmembrane protein 164	AGGAAGCAAGTCGTGACTTGACTTGGAGAACACCCAGTTCTTGATAAAATCATGGGAGAG
	A_24_P944299	CDC42BPA	2.06934e-24	1.02165e-26	2.87	up	4.90542	up	3.70689	up	Homo sapiens CDC42 binding protein kinase alpha (DMPK-like) (CDC42BPA), transcript variant B, mRNA [NM_003607]	CDC42 binding protein kinase alpha (DMPK-like)	GACTTTGTTACTCAAGTCCAGAGTTCTCTGTGCACTTCTGCTAGATAAGGAGTGTAAGCC
	A_23_P157117	CREB5	2.06934e-24	1.0239e-26	4.55752	up	4.17865	up	4.56018	up	Homo sapiens cAMP responsive element binding protein 5 (CREB5), transcript variant 1, mRNA [NM_182898]	cAMP responsive element binding protein 5	CTTGGGAAACGCTTTGGTGCTTTTCTCCAGTTTTCTGGTACCAGTTACTTGTTTATAAAC
	A_33_P3294042		2.07411e-24	1.03035e-26	-4.23797	down	-4.12556	down	-4.49685	down	T cell receptor beta variable 10-1(gene/pseudogene) [Source:HGNC Symbol;Acc:HGNC:12177] [ENST00000390364]		ACTAACAAAGGAGAAGTCTCAGATGGCTACAGTGTCTCTAGATCAAACACAGAGGACCTC
	A_33_P3289236	HPR	2.11269e-24	1.05368e-26	11.3396	up	13.6143	up	8.98925	up	Homo sapiens haptoglobin-related protein (HPR), mRNA [NM_020995]	haptoglobin-related protein	AAGCTTTGATAAGAGCTGTGCTGTGGCTGAGTATGGTGTGTATGTGAAGGTGACTTCCAT
	A_23_P141394	WIPI1	2.3124e-24	1.15784e-26	2.87572	up	3.31957	up	2.73611	up	Homo sapiens WD repeat domain, phosphoinositide interacting 1 (WIPI1), mRNA [NM_017983]	WD repeat domain, phosphoinositide interacting 1	CAGGCAAAGTCTTTTTTGGCTGTGGCTGGAATAAATCATTTATTACTTGGGAGTCCCATT
	A_21_P0014947	lnc-F8A2-2	2.35317e-24	1.1829e-26	8.13038	up	5.12996	up	5.18725	up	Homo sapiens cDNA FLJ25895 fis, clone CBR03553. [AK098761]	lnc-F8A2-2:1	ATCCACCATGTGGTTCTTTGAGTTCTCGGTTTCTTTTCTGAGCTCAGTAATCTCCTTTTT
	A_33_P3404047		2.37906e-24	1.2006e-26	4.04469	up	3.04579	up	2.82198	up			TCATATTCATCCACGTCCACCTTCCGGAAGCGGGCCGACGACACTGTGTTCTTCGACATC
	A_23_P346006	CCPG1	2.55884e-24	1.29637e-26	2.36186	up	3.01837	up	2.77132	up	Homo sapiens cell cycle progression 1 (CCPG1), transcript variant 2, mRNA [NM_020739]	cell cycle progression 1	TATGGTCGCACTAATGGAAGACAAATGGCAAATCTTGAAATAGAATTGGGGCAATTACCT
	A_33_P3238579		2.64858e-24	1.34706e-26	-4.3622	down	-5.22243	down	-4.70158	down	T cell receptor beta variable 11-3 [Source:HGNC Symbol;Acc:HGNC:12182] [ENST00000611787]		TTTTGGTGCAATCCTATTTCTGGCCACAATACCCTTTACTGGTACCTGCAGAACTTGGGA
	A_23_P133133	ALPK1	2.68925e-24	1.37304e-26	6.72275	up	4.88717	up	4.63684	up	Homo sapiens alpha-kinase 1 (ALPK1), transcript variant 1, mRNA [NM_025144]	alpha-kinase 1	ATGTGAGCCTTTGTGATACGAATTCAATTTGTTTTCCTGTCTTTTGACATTTGACTTTGC
	A_24_P201064	PPP1R3B	2.72029e-24	1.39425e-26	5.99889	up	3.87113	up	4.20709	up	Homo sapiens protein phosphatase 1, regulatory subunit 3B (PPP1R3B), transcript variant 1, mRNA [NM_001201329]	protein phosphatase 1, regulatory subunit 3B	AAGGGGAAATGCACTTTAAAAATCCCAAGAATGGATGTTCTTTGTGTGGTATGAGAGGTT
	A_23_P41854	CARD6	2.76438e-24	1.4223e-26	3.08401	up	2.5612	up	2.38863	up	Homo sapiens caspase recruitment domain family, member 6 (CARD6), mRNA [NM_032587]	caspase recruitment domain family, member 6	ACTAGCTTCTGCTAATAGCCCCAATTTGCTTGAATGGGAAAACTCTCTCATTTGACCCTT
	A_21_P0013709	LINC01503	2.948e-24	1.52258e-26	5.28497	up	3.41665	up	3.72639	up	long intergenic non-protein coding RNA 1503 [Source:HGNC Symbol;Acc:HGNC:51184] [ENST00000423122]	long intergenic non-protein coding RNA 1503	TACAGCTGCGTAGCATCGTGGTAAGAACACCCGCCCTGACATCACACAGACCTGCATCCA
	A_21_P0000052	DISC1	2.95213e-24	1.53054e-26	5.15925	up	3.34821	up	4.77748	up	Homo sapiens disrupted in schizophrenia 1 (DISC1), transcript variant q, mRNA [NM_001164554]	disrupted in schizophrenia 1	GTGAATTTGAGAAATGTCAGACTGTGCCAAAGGGGGTCACATGCATCAAATTTCCACATA
	A_23_P25155	GPR84	2.98217e-24	1.55199e-26	5.90769	up	8.85309	up	4.8229	up	Homo sapiens G protein-coupled receptor 84 (GPR84), mRNA [NM_020370]	G protein-coupled receptor 84	AATTCAGGACTGTCTCCTCCAGGACCAAAGTGGCCAGGTAATAGGAGAATAGGTGAAATA
	A_33_P3410892		3.08671e-24	1.61248e-26	10.5052	up	5.89466	up	5.27041	up			TGGCTCAGCTCCCGCCTGCGTTTGTAGACCCCAAAGTTTCTGCAACCAAGCTCTTCAGAC
	A_33_P3283718	lnc-MYO10-1	3.15478e-24	1.65426e-26	14.8227	up	13.3213	up	12.663	up	Homo sapiens cDNA FLJ43202 fis, clone FEBRA2008360. [AK125192]	lnc-MYO10-1:1	GCTGGTGTTAAGATCCCTGAGTCCACGTCATATCATAATGCATGATTATTTTATTGAAAT
	A_23_P171336	NXF3	3.18248e-24	1.67506e-26	3.67248	up	6.48834	up	4.67358	up	Homo sapiens nuclear RNA export factor 3 (NXF3), mRNA [NM_022052]	nuclear RNA export factor 3	TCATCCTTCCAAAGGGGCCAGTTGTTCTGTGCACTTGTCCACCCCTGTTACCCCCAGGAT
	A_33_P3267799	LILRB4	3.42821e-24	1.81115e-26	4.01041	up	2.90065	up	2.29042	up	Homo sapiens leukocyte immunoglobulin-like receptor, subfamily B (with TM and ITIM domains), member 4 (LILRB4), transcript variant 1, mRNA [NM_001278426]	leukocyte immunoglobulin-like receptor, subfamily B (with TM and ITIM domains), member 4	AAATATTACACATCAAACCAATGACATGGGAAAATGGGAGCTTCTAATGAGGACAAACAA
	A_23_P57709	PCOLCE2	3.49925e-24	1.85558e-26	19.6744	up	52.6498	up	24.3691	up	Homo sapiens procollagen C-endopeptidase enhancer 2 (PCOLCE2), mRNA [NM_013363]	procollagen C-endopeptidase enhancer 2	TATCTGATTGGAAACCTGCCGACTTAGTGCGGTGATAGGAAGCTAAAAGTGTCAAGCGTT
	A_23_P43276	GPR124	3.52022e-24	1.87364e-26	2.14756	up	-1.61318	down	-1.26826	down	Homo sapiens G protein-coupled receptor 124 (GPR124), mRNA [NM_032777]	G protein-coupled receptor 124	AAAGCTTTGTATTATTCTTCCACATATGCTGGCTGCTGTTTACACACCCTGCCAATGCCT
	A_23_P138655	CYP26A1	3.59325e-24	1.91959e-26	6.05553	up	9.74078	up	8.85268	up	Homo sapiens cytochrome P450, family 26, subfamily A, polypeptide 1 (CYP26A1), transcript variant 2, mRNA [NM_057157]	cytochrome P450, family 26, subfamily A, polypeptide 1	TGTGGACAATCTCCCTGCAAGATTCACCCATTTCCATGGGGAAATCTGATGAGCTTGAAT
	A_23_P132910	RBM47	3.59437e-24	1.92727e-26	4.49652	up	3.6478	up	3.6298	up	Homo sapiens RNA binding motif protein 47 (RBM47), transcript variant 2, mRNA [NM_019027]	RNA binding motif protein 47	CACGGGATTTTTGTTGATGGCTGAATTCTTGTGGATTCATAAGAGGATCATGCCCTTAGC
	A_24_P107941	USB1	3.66591e-24	1.97286e-26	4.64108	up	3.85261	up	3.26137	up	Homo sapiens U6 snRNA biogenesis 1 (USB1), transcript variant 1, mRNA [NM_024598]	U6 snRNA biogenesis 1	CTTCAGGTGTCTTCTGGATTTCTGGTGATGGACAGAGAAATCTTTTTACAGTTTCAAATT
	A_33_P3263217	LRRC4	3.83324e-24	2.07047e-26	6.54421	up	4.45692	up	4.46097	up	Homo sapiens leucine rich repeat containing 4 (LRRC4), mRNA [NM_022143]	leucine rich repeat containing 4	GGAGGGGAATTGCCAACAAAAGAACACTGATTGTAATGTGAGAAAAGTGTATTTTTGTAT
	A_21_P0011702	XLOC_l2_006789	3.87175e-24	2.0989e-26	2.66203	up	2.3419	up	1.9441	up	BROAD Institute lincRNA (XLOC_l2_006789), lincRNA [TCONS_l2_00012635]		TGGAGCCACAGCCCTGGTCTTCCTGTCCTTCTGCGTCATCTTCATCGTGTGAGCATTGAC
	A_33_P3413038	PLXNB3	3.88657e-24	2.1146e-26	1.83435	up	6.23302	up	5.11158	up	Homo sapiens plexin B3 (PLXNB3), transcript variant 2, mRNA [NM_001163257]	plexin B3	CCCCATTGTATTTATTTGCCTGCTGGAAAATCACATCCGGAAATAAAATAGAAATATGTC
	A_23_P137935	MNDA	3.90994e-24	2.13502e-26	4.90339	up	3.09709	up	3.20716	up	Homo sapiens myeloid cell nuclear differentiation antigen (MNDA), mRNA [NM_002432]	myeloid cell nuclear differentiation antigen	CAAGCTGAAACTGGTGTGTGGAAGTCACAGCTTCATCAAGGTCATCAAGGCCAAGAAAAA
	A_24_P353619	ALPL	3.94079e-24	2.1674e-26	7.67369	up	8.64106	up	8.31794	up	Homo sapiens alkaline phosphatase, liver/bone/kidney (ALPL), transcript variant 1, mRNA [NM_000478]	alkaline phosphatase, liver/bone/kidney	GCTACAAGGTGGTGGGCGGTGAACGAGAGAATGTCTCCATGGTGGACTATGCTCACAACA
	A_21_P0011877	LOC102725407	3.94079e-24	2.16243e-26	4.26888	up	7.19796	up	5.36411	up		uncharacterized LOC102725407	TAGGTTTCTCTGCAGAAGACAGCAAGATGCCCCAGGGAATGTTTGTGAAAAAGGATGACT
	A_33_P3319041	HMGB3	4.1251e-24	2.27691e-26	3.98255	up	4.76879	up	3.57047	up	Homo sapiens high mobility group box 3 (HMGB3), transcript variant 1, mRNA [NM_001301228]	high mobility group box 3	GTATTTGGGGACGTTGGATGCATTCATTTTCTGTAATAAAGTTTCTTAATCACTCTTCCC
	A_23_P127385	MYBPC3	4.20667e-24	2.34681e-26	5.46946	up	5.78712	up	5.90509	up	Homo sapiens myosin binding protein C, cardiac (MYBPC3), mRNA [NM_000256]	myosin binding protein C, cardiac	TGGGGAAACCCCTCCCTACTGTTGGATGTATGTGTGACAAGTGTGTCTCCTGTGCTGCGA
	A_24_P229151		4.20667e-24	2.34669e-26	-4.89545	down	-4.99525	down	-4.81412	down	T cell receptor alpha variable 29/delta variable 5 (gene/pseudogene) [Source:HGNC Symbol;Acc:HGNC:12127] [ENST00000390458]		GAGCGTCCAGGAAGGAAGAATTTCTATTCTGAACTGTGACTATACTAACAGCATGTTTGA
	A_23_P376060	IKZF3	4.20667e-24	2.33988e-26	-17.6064	down	-7.6438	down	-7.65928	down	Homo sapiens IKAROS family zinc finger 3 (Aiolos) (IKZF3), transcript variant 1, mRNA [NM_012481]	IKAROS family zinc finger 3 (Aiolos)	TGCTCTCAAAACATACTCAGTTCCAAACTTCTTTTCATACCATTTTTAGCTGTGTTCACA
	A_23_P103932	FGR	4.32337e-24	2.42043e-26	3.05849	up	2.44017	up	2.19129	up	Homo sapiens FGR proto-oncogene, Src family tyrosine kinase (FGR), transcript variant 2, mRNA [NM_001042747]	FGR proto-oncogene, Src family tyrosine kinase	TTGCAGAGCACTTCCCACCTCTCTGAATAGTGTGTATGTGTTGGTTTATTGATTCTGTAA
	A_33_P3348270		4.32415e-24	2.42939e-26	-4.85956	down	-5.19608	down	-5.2233	down	T cell receptor beta variable 5-4 [Source:HGNC Symbol;Acc:HGNC:12221] [ENST00000454561]		TCAGGGGCCCCAGTTTATCTTTCAGTATTATAGGGAGGAAGAGAATGGCAGAGGAAACTT
	A_23_P164057	MFAP4	4.46975e-24	2.52001e-26	6.88063	up	5.58581	up	2.81634	up	Homo sapiens microfibrillar-associated protein 4 (MFAP4), transcript variant 2, mRNA [NM_002404]	microfibrillar-associated protein 4	AAATTACACCTGGAGTCAGGTGCAGAAGGGAACCTTGTATTTCACAGGCCTCATTTTGAT
	A_21_P0014944	LOC102724156	4.54737e-24	2.57273e-26	9.9414	up	5.66094	up	5.52904	up	PREDICTED: Homo sapiens uncharacterized LOC102724156 (LOC102724156), transcript variant X1, ncRNA [XR_426407]	uncharacterized LOC102724156	CAACTCAACCTCCTCTTTCTGCCTCTACCCAAATTTTAAAACTTTTAAACATGGGTTTAA
	A_21_P0003114	LOC102724231	4.82155e-24	2.73736e-26	5.56139	up	4.83731	up	4.57425	up	long intergenic non-protein coding RNA 694 [Source:HGNC Symbol;Acc:HGNC:44570] [ENST00000416124]	uncharacterized LOC102724231	GGGGTCTCACAGGAACATGCCCAGTGCTTTCAAACCCAGTAAAATTTTACTTAGATTTTG
	A_33_P3220015		5.04988e-24	2.87694e-26	-6.99125	down	-5.58374	down	-4.97922	down	T cell receptor gamma variable 10 (non-functional) [Source:HGNC Symbol;Acc:HGNC:12285] [ENST00000390341]		TTCAATCCTTACCATCAAGTCCGTAGAGAAAGAAGACATGGCCGTTTACTACTGTGCTGC
	A_23_P154855	KCNE1	5.09821e-24	2.91453e-26	4.72825	up	6.37386	up	5.44948	up	Homo sapiens potassium voltage-gated channel, Isk-related family, member 1 (KCNE1), transcript variant 2, mRNA [NM_000219]	potassium channel, voltage gated subfamily E regulatory beta subunit 1	TATGTCGTTGAAAACCATCTGGCCATAGAACAACCCAACACACACCTTCCTGAGACGAAG
	A_23_P24922	LIPT2	5.29226e-24	3.03589e-26	-1.96819	down	-2.15262	down	-2.25931	down	Homo sapiens lipoyl(octanoyl) transferase 2 (putative) (LIPT2), mRNA [NM_001144869]	lipoyl(octanoyl) transferase 2 (putative)	GTCACCTACTGAAACCCAGATTTTAGACCTGGCCTGTCATTCACTGATCATGAAACTAAG
	A_23_P145786	MLXIPL	5.36205e-24	3.0865e-26	8.16303	up	7.91213	up	4.56451	up	Homo sapiens MLX interacting protein-like (MLXIPL), transcript variant 1, mRNA [NM_032951]	MLX interacting protein-like	CCTTGGGTGACTCGTCCGCTGTCTTTGGACCGCTGTGTTTCAATCTGCAAAATGGGGATG
	A_23_P399146	ZNF549	5.43713e-24	3.14043e-26	-3.00797	down	-3.216	down	-3.34158	down	Homo sapiens zinc finger protein 549 (ZNF549), transcript variant 2, mRNA [NM_153263]	zinc finger protein 549	CTGGTTTTCCAAAAGGAGAGGTAGATGCATATTTTTGTGTGGAACCATTTATCTTAAAAC
	A_23_P149375	THEM4	5.71139e-24	3.3101e-26	-4.20238	down	-4.09921	down	-3.69561	down	Homo sapiens thioesterase superfamily member 4 (THEM4), mRNA [NM_053055]	thioesterase superfamily member 4	ATACAAAGAGGATTCAGTTTCCATCTTCTCAACTTTTTAACACAGAAACACTTCCTGCGA
	A_33_P3397127		6.06062e-24	3.52445e-26	-6.70684	down	-6.50509	down	-5.39001	down	Homo sapiens mRNA for T cell receptor beta variable 6, partial cds, clone: un 226. [AB306238]		TGAGGGTACAACTGCCAAAGGAGAGGTCCCTGATGGCTACAATGTCTCCAGATTAAAAAA
	A_33_P3289121	C2orf40	6.14901e-24	3.58798e-26	-6.03119	down	-6.64032	down	-6.35646	down	Homo sapiens chromosome 2 open reading frame 40 (C2orf40), mRNA [NM_032411]	chromosome 2 open reading frame 40	CTGATTTGCTCTATTTCAGCAGATCTTTTCTACCTACTTTGTGTGATCAAAAAAGAAGAG
	A_23_P153676	TLE2	6.24501e-24	3.6563e-26	-4.49807	down	-4.51085	down	-4.07073	down	Homo sapiens transducin-like enhancer of split 2 (TLE2), transcript variant 1, mRNA [NM_003260]	transducin-like enhancer of split 2	CGTCCTCAGTCCTGAGTTGTGACATCTCCAGAAATAACAAATACATTGTGACAGGCTCGG
	A_21_P0012056	LOC101929567	6.26583e-24	3.68084e-26	2.68942	up	3.60081	up	4.0546	up		uncharacterized LOC101929567	GTCAGAAATCTATCTTAGGAAGCCATTCCTGAGATCTGTTCTAATTTAGGCCATTTTTAA
	A_21_P0008485	LINC01550	7.00415e-24	4.12837e-26	-4.33853	down	-5.14367	down	-4.92351	down	long intergenic non-protein coding RNA 1550 [Source:HGNC Symbol;Acc:HGNC:20111] [ENST00000554822]	long intergenic non-protein coding RNA 1550	AAATAACACTGAAATTGTGGGAAGATGGGATGGTAAGAACAAAGTCTGTCTCTGGAAGCA
	A_23_P80032	E2F1	7.16173e-24	4.23537e-26	1.55552	up	4.32526	up	3.41842	up	Homo sapiens E2F transcription factor 1 (E2F1), mRNA [NM_005225]	E2F transcription factor 1	CTGGGCGTGTAGGACGGTGAGAGCACTTCTGTCTTAAAGGTTTTTTCTGATTGAAGCTTT
	A_19_P00809417	ATF7IP2	7.23962e-24	4.29571e-26	-2.10634	down	-2.46785	down	-2.60528	down	activating transcription factor 7 interacting protein 2 [Source:HGNC Symbol;Acc:HGNC:20397] [ENST00000570163]	activating transcription factor 7 interacting protein 2	AATGTTCTGCTTTCCTTGCCTTATGCCTGTACTTCACCTCAGCCTTCAATTCCATTGTGT
	A_23_P48676	PYGL	7.29e-24	4.33997e-26	3.55719	up	3.56664	up	3.29609	up	Homo sapiens phosphorylase, glycogen, liver (PYGL), transcript variant 1, mRNA [NM_002863]	phosphorylase, glycogen, liver	TTCTCCAGTGACCGAACAATTAAAGAATATGCCCAAAACATCTGGAACGTGGAACCTTCA
	A_33_P3262124	MMP25	7.46964e-24	4.46164e-26	6.51777	up	4.73129	up	5.28745	up	Homo sapiens matrix metallopeptidase 25 (MMP25), mRNA [NM_022468]	matrix metallopeptidase 25	GCACCCCATCTCCGGGGACACTCACTTTGACGATGAGGAGACCTGGACTTTTGGGTCAAA
	A_23_P171296	MPP1	8.94348e-24	5.3596e-26	4.04362	up	3.42865	up	3.12958	up	Homo sapiens membrane protein, palmitoylated 1, 55kDa (MPP1), transcript variant 1, mRNA [NM_002436]	membrane protein, palmitoylated 1, 55kDa	CCAAAATGACACATCTGTGCAATAGAATGATGTCTGCTCTAGGGAAACCTTCAAAAGCAA
	A_23_P321703	BCL2A1	9.18275e-24	5.52109e-26	4.29902	up	3.77944	up	3.86024	up	Homo sapiens BCL2-related protein A1 (BCL2A1), transcript variant 1, mRNA [NM_004049]	BCL2-related protein A1	AGGAAAGATCTGTGAAATGCTCTTCTGTCCTGAAGCAATACTGTTGACCAGAAAGGACAC
	A_23_P216935	MIR600HG	9.50488e-24	5.73351e-26	-5.11536	down	-3.62128	down	-4.50071	down	Homo sapiens MIR600 host gene (non-protein coding) (MIR600HG), long non-coding RNA [NR_026677]	MIR600 host gene (non-protein coding)	ACTGTGTTTTTCTGAATACGCAAGTGTAAATAGTATAATTTGCAGTGCAAAATCCTTGGC
	A_33_P3245120	LOC200772	9.5128e-24	5.75703e-26	-3.65982	down	-3.80859	down	-7.27628	down	Homo sapiens uncharacterized LOC200772 (LOC200772), long non-coding RNA [NR_033841]	uncharacterized LOC200772	GGCACCATGGCCTGTGTTCTGTTCACTGCACACTGAACCATACATTCAACGCCAGTCAGG
	A_24_P529627		1.05144e-23	6.38392e-26	-5.36034	down	-5.29481	down	-5.22326	down	T cell receptor beta variable 6-1 [Source:HGNC Symbol;Acc:HGNC:12226] [ENST00000390353]		TGATTTATTACTCAGCTTCTGAGGGTACCACTGACAAAGGAGAAGTCCCCAATGGCTACA
	A_33_P3388651	ABLIM1	1.0807e-23	6.5829e-26	-6.22526	down	-3.78463	down	-3.98604	down	Homo sapiens actin binding LIM protein 1 (ABLIM1), transcript variant 3, mRNA [NM_001003408]	actin binding LIM protein 1	AAGCAAAACTCTTCTAAGTCCCACTCGTGAATGGCAATTAGAGAAAGGACTGACAGTGGC
	A_23_P259442	CPE	1.23306e-23	7.55954e-26	8.42365	up	11.186	up	6.43539	up	Homo sapiens carboxypeptidase E (CPE), mRNA [NM_001873]	carboxypeptidase E	TCTTGTGCTGACTAACTATAAGCATGATCTTGTTAATGCATTTTTGATGGGAAGAAAAGG
	A_33_P3420762		1.23306e-23	7.55188e-26	3.10418	up	2.14052	up	2.10897	up	HSENOAL2 alpha-enolase {Homo sapiens} (exp=-1; wgp=0; cg=0) , partial (78%) [THC2577776]		GATTCCCGCGAGAGTCAAAGATCTCCCTGGCATGGATCTTGAGAATAGACATGGTGAACT
	A_33_P3278144	ANKRD42	1.25352e-23	7.70973e-26	-3.02566	down	-3.26181	down	-3.12624	down	Homo sapiens ankyrin repeat domain 42 (ANKRD42), transcript variant 6, mRNA [NM_001300977]	ankyrin repeat domain 42	ACTGATATGTCAAAAATTAAGTGTAACTGGCGGAAACCCAGAGGTATTGACGACAGGGTT
	A_21_P0003973		1.41578e-23	8.73561e-26	6.20091	up	5.85614	up	6.54862	up			TGAAAAGTGGTGAAAGTTGCTAACTGCTGTGTTCCTCTGCTTGCTTTTCATGCTGTGTGC
	A_33_P3356022		1.4408e-23	8.91839e-26	-5.0291	down	-4.88239	down	-4.27125	down	T cell receptor alpha variable 35 [Source:HGNC Symbol;Acc:HGNC:12134] [ENST00000390462]		ACAGCTTCCTGAATATCTCAGCATCCATACCTAGTGATGTAGGCATCTACTTCTGTGCTG
	A_33_P3376249	S100A2	1.52533e-23	9.47166e-26	4.47772	up	2.92707	up	3.16064	up	Homo sapiens S100 calcium binding protein A2 (S100A2), mRNA [NM_005978]	S100 calcium binding protein A2	TGGATCTCTTGGGCCCAGGACTGTTGATGCCTTTGAGTTTTGTATTCAATAAACTTTTTT
	A_23_P61447	ETFDH	1.53767e-23	9.57859e-26	2.75001	up	2.25977	up	1.98486	up	Homo sapiens electron-transferring-flavoprotein dehydrogenase (ETFDH), transcript variant 1, mRNA [NM_004453]	electron-transferring-flavoprotein dehydrogenase	AAGGTGGAGGAGGACCTGCTTACAATGGAATGTAAACTGCAGCTAGCCAGTTTCTTTCAA
	A_24_P314786	SLC4A10	1.6544e-23	1.03384e-25	-8.62272	down	-8.48691	down	-6.99624	down	Homo sapiens solute carrier family 4, sodium bicarbonate transporter, member 10 (SLC4A10), transcript variant 2, mRNA [NM_022058]	solute carrier family 4, sodium bicarbonate transporter, member 10	AGGGCACAGTACAACTCCCATTGGAAGGGCACTATAGAGATGATCCATCTGTGATCAATA
	A_23_P159775	GABRE	1.66478e-23	1.04688e-25	5.5478	up	4.73238	up	4.71987	up	Homo sapiens gamma-aminobutyric acid (GABA) A receptor, epsilon (GABRE), mRNA [NM_004961]	gamma-aminobutyric acid (GABA) A receptor, epsilon	GGTGGATAGGGTGGGGTCTCCATCTACTTTTTGTCACCATCATCTGAAATGGGGAAATAT
	A_33_P3210343	ETV6	1.66478e-23	1.04624e-25	3.57389	up	2.07594	up	1.96717	up	Homo sapiens ets variant 6 (ETV6), mRNA [NM_001987]	ets variant 6	GCCTTTTCTCAGGGCCAGTGAGTTGCAAATAATTTTTAAAGAAAAGCCTATAATTACATC
	A_23_P76882	CCNB1IP1	1.68577e-23	1.06341e-25	-2.07187	down	-2.02595	down	-2.16394	down	Homo sapiens cyclin B1 interacting protein 1, E3 ubiquitin protein ligase (CCNB1IP1), transcript variant 4, mRNA [NM_182852]	cyclin B1 interacting protein 1, E3 ubiquitin protein ligase	TTGAACCATCCATGATTGCACAGTCTGGTGTTCTTGGCTTCCCATTAGGTAACAACTCCA
	A_24_P52921	BCAT1	1.72696e-23	1.0928e-25	3.49938	up	3.9586	up	2.97869	up	Homo sapiens branched chain amino-acid transaminase 1, cytosolic (BCAT1), transcript variant 1, mRNA [NM_005504]	branched chain amino-acid transaminase 1, cytosolic	CTTTACTGGATAAATGAAGATGGAGAAGAAGAACTGGCAACTCCTCCACTAGATGGCATC
	A_33_P3615955		1.78538e-23	1.13328e-25	4.53935	up	4.54913	up	4.09254	up			TCCTCGCTGCCTTCATACACAAATACTCCTCGATGATGCATCGATTCGTTCCCTCGCTAG
	A_33_P3246829	IL1RN	1.82683e-23	1.16319e-25	3.47514	up	2.65961	up	2.51103	up	Homo sapiens interleukin 1 receptor antagonist (IL1RN), transcript variant 4, mRNA [NM_173843]	interleukin 1 receptor antagonist	CTCCAGAATGGTCTTTCTAATGTGTGAATCAGAGCACAGCAGCCCCTGCACAAAGCCCTT
	A_33_P3299220	ADAMTSL4	1.83014e-23	1.16891e-25	3.96202	up	2.55287	up	2.25667	up	Homo sapiens ADAMTS-like 4 (ADAMTSL4), transcript variant 2, mRNA [NM_025008]	ADAMTS-like 4	CCAGCCATATCCTGCATCCTGGGTAACCACGCCCAGGACACCTCAGCCTTTCCAGCATAG
	A_24_P254551	ARHGEF9	1.84803e-23	1.18398e-25	-2.85868	down	-2.85754	down	-3.07834	down	Homo sapiens Cdc42 guanine nucleotide exchange factor (GEF) 9 (ARHGEF9), transcript variant 1, mRNA [NM_015185]	Cdc42 guanine nucleotide exchange factor (GEF) 9	AAGGGGAGCCCAATTAAATACCTGGGTTCAGTATCCTAACCTGTTATGTCCTGACAGCAA
	A_23_P122924	INHBA	1.85579e-23	1.19627e-25	5.78702	up	11.4942	up	11.5324	up	Homo sapiens inhibin, beta A (INHBA), mRNA [NM_002192]	inhibin, beta A	AAACATCATCAAAAAGGACATTCAGAACATGATCGTGGAGGAGTGTGGGTGCTCATAGAG
	A_33_P3264416		1.85579e-23	1.19442e-25	-5.55188	down	-5.59781	down	-5.03664	down	T cell receptor beta variable 18 [Source:HGNC Symbol;Acc:HGNC:12193] [ENST00000611520]		TGAGGATCCAGCAGGTAGTGCGAGGAGATTCGGCAGCTTATTTCTGTGCCAGCTCACCAC
	A_24_P148717	CCR1	1.88694e-23	1.22007e-25	5.18155	up	2.94478	up	2.86586	up	Homo sapiens chemokine (C-C motif) receptor 1 (CCR1), mRNA [NM_001295]	chemokine (C-C motif) receptor 1	CTTTTCAAGTTGGGTGATATGTTGGTAGATTCTAATGGCTTTATTGCAGCGATTAATAAC
	A_33_P3337154	LOC102724545	1.96604e-23	1.27509e-25	3.74319	up	3.48299	up	4.19756	up	PREDICTED: Homo sapiens uncharacterized LOC102724545 (LOC102724545), transcript variant X1, ncRNA [XR_425228]	uncharacterized LOC102724545	TTCCCAGAGGTGAGGAAACACACTGAGAGACAGAACACGACTTGACCAGGGCCACCCTGT
	A_32_P874898		2.13738e-23	1.39043e-25	-6.47592	down	-6.20042	down	-6.03614	down	T cell receptor beta variable 5-1 [Source:HGNC Symbol;Acc:HGNC:12218] [ENST00000390381]		CAGGACAGGGCCTTCAGTTCCTCTTTGAATACTTCAGTGAGACACAGAGAAACAAAGGAA
	A_23_P62907	ATF6	2.13806e-23	1.39508e-25	2.36355	up	1.80634	up	1.69948	up	Homo sapiens activating transcription factor 6 (ATF6), mRNA [NM_007348]	activating transcription factor 6	CTGTACCTTTCTAAACCTCTCTTCCCTCTGTGATGGTTTTGTGTTTAAACAGTCATCTTC
	A_33_P3311971		2.15826e-23	1.41252e-25	-7.81053	down	-6.18066	down	-5.98683	down	T cell receptor beta variable 6-5 [Source:HGNC Symbol;Acc:HGNC:12230] [ENST00000390368]		ATTCATTACTCAGTTGGTGCTGGTATCACTGACCAAGGAGAAGTCCCCAATGGCTACAAT
	A_23_P216340	SLA	2.21955e-23	1.457e-25	3.0999	up	2.65371	up	2.11612	up	Homo sapiens Src-like-adaptor (SLA), transcript variant 1, mRNA [NM_001045556]	Src-like-adaptor	ACCCCCTGAACTCCAGATGTCTGCACAGTATCTTATGTGTTGTTTTCCGTTGTGACGAAT
	A_21_P0005078	lnc-SOD2-2	2.34654e-23	1.54826e-25	3.79023	up	4.78687	up	4.70879	up	LNCipedia lincRNA (lnc-SOD2-2), lincRNA [lnc-SOD2-2:5]	lnc-SOD2-2:5	TGCCTTGTAGCTAATGGGTGGGGGTGGAAGTCTTGCTTGGACTGTCGATACCAGGAGTGG
	A_24_P406060	RNF144B	2.34654e-23	1.54962e-25	3.0986	up	3.35592	up	2.57907	up	Homo sapiens ring finger protein 144B (RNF144B), mRNA [NM_182757]	ring finger protein 144B	CTTATCCAGGTTTGCAAATGTACATGTTCATTTGAATGTAAATCACCATTTCTTGGAACC
	A_23_P78742	FLT3LG	2.47225e-23	1.63751e-25	-6.71271	down	-5.90111	down	-5.01999	down	Homo sapiens fms-related tyrosine kinase 3 ligand (FLT3LG), transcript variant 3, mRNA [NM_001459]	fms-related tyrosine kinase 3 ligand	ACTGTCGCTGGGTCCAAGATGCAAGGCTTGCTGGAGCGCGTGAACACGGAGATACACTTT
	A_24_P160491	FAM159A	2.47608e-23	1.64493e-25	-4.46885	down	-3.46499	down	-3.6638	down	family with sequence similarity 159, member A [Source:HGNC Symbol;Acc:HGNC:28757] [ENST00000440303]	family with sequence similarity 159, member A	GAGGCCTCAGCAAGTGTCAGCCACACGAATGAGTGTATGGAGCAAAGGAGGAGTGAACGT
	A_23_P99163	DRAM1	2.54516e-23	1.69652e-25	2.93553	up	2.93223	up	2.52335	up	Homo sapiens DNA-damage regulated autophagy modulator 1 (DRAM1), mRNA [NM_018370]	DNA-damage regulated autophagy modulator 1	CCTCACGATGGAGTTTCATGCTTCATTTTCACATCTCTCTGCACAATTAGATTGGGAGCT
	A_19_P00320846	UBA6-AS1	2.54516e-23	1.70086e-25	-4.33654	down	-2.78418	down	-3.10838	down	Homo sapiens UBA6 antisense RNA 1 (head to head) (UBA6-AS1), long non-coding RNA [NR_015439]	UBA6 antisense RNA 1 (head to head)	TGGGGGTTGACAAATTCCCATCAAGCTCTGTGGATCTTGTACAACTGCTCACCACCGGCT
	A_33_P3313652		2.57549e-23	1.7262e-25	3.93852	up	3.06577	up	3.30289	up			GCCTGCAGGCTCCGGGGGGGTTGGGGGCTGGGGCTCCCGGGGTGATGCCTGCCCTTGGCA
	A_33_P3238685	TET2	2.72403e-23	1.83113e-25	6.30345	up	4.287	up	4.56883	up	Homo sapiens tet methylcytosine dioxygenase 2 (TET2), transcript variant 1, mRNA [NM_001127208]	tet methylcytosine dioxygenase 2	TCAAGACTTGCCGACAAAGGAAACTAGAAGCCAAGAAAGCTGCAGCTGAAAAGCTTTCCT
	A_23_P132175	RTN4R	2.9448e-23	1.98534e-25	-3.61773	down	-3.95558	down	-3.62608	down	Homo sapiens reticulon 4 receptor (RTN4R), mRNA [NM_023004]	reticulon 4 receptor	CTCCCACCCAGATCGCGGTATATAGAGATATGCATTTTATTTTACTTGTGTAAAAATATC
	A_33_P3228612	CACNA1E	2.95086e-23	1.99524e-25	15.5102	up	16.4337	up	13.8558	up	Homo sapiens calcium channel, voltage-dependent, R type, alpha 1E subunit (CACNA1E), transcript variant 1, mRNA [NM_001205293]	calcium channel, voltage-dependent, R type, alpha 1E subunit	CAGCCTGCACTTACTCTTCTATTAAGACCAGAAAATAAAATAATTTTCCGTTGAGTCACA
	A_21_P0011876	LOC102725407	3.12871e-23	2.12166e-25	4.81942	up	7.42283	up	5.7221	up	PREDICTED: Homo sapiens uncharacterized LOC102725407 (LOC102725407), transcript variant X2, ncRNA [XR_425533]	uncharacterized LOC102725407	TCTAGGTTTCTCTGCAGAAGACAGCAAGATGCCCCAGGGAATGTTTGTGAAAAAGGATGA
	A_33_P3383762		3.16326e-23	2.15132e-25	4.22265	up	4.78306	up	4.61651	up			CGGGGCTGGGGCCGAGACCAGGACACCTTGATCTGCCCTGCCAGTCACCGTCTTGGGTAG
	A_23_P53176	FOLR1	3.24098e-23	2.21057e-25	4.88515	up	4.84613	up	5.16263	up	Homo sapiens folate receptor 1 (adult) (FOLR1), transcript variant 1, mRNA [NM_016725]	folate receptor 1 (adult)	CCACAGCTCCCAACTATTTGGTTCCTGCTCCATGGTCGGGCCTCTGACAGCCACTTTGAA
	A_33_P3243857	ADAM10	3.32364e-23	2.27351e-25	2.18868	up	2.19101	up	2.01655	up	Homo sapiens ADAM metallopeptidase domain 10 (ADAM10), mRNA [NM_001110]	ADAM metallopeptidase domain 10	CTGTTCTTCGTTGCTGCATTTTCTTCACTTGCAGGCAAACTTGGCTCTCAATAAACTTTT
	A_23_P145096	PLA2G7	3.36898e-23	2.31116e-25	1.76357	up	-2.4031	down	-2.49197	down	Homo sapiens phospholipase A2, group VII (platelet-activating factor acetylhydrolase, plasma) (PLA2G7), transcript variant 1, mRNA [NM_005084]	phospholipase A2, group VII (platelet-activating factor acetylhydrolase, plasma)	AAAGCATTTAGGACTTCATAAAGATTTTGATCAGTGGGACTGCTTGATTGAAGGAGATGA
	A_23_P18372	B3GNT5	3.41304e-23	2.34811e-25	5.48111	up	2.99074	up	2.98113	up	Homo sapiens UDP-GlcNAc:betaGal beta-1,3-N-acetylglucosaminyltransferase 5 (B3GNT5), mRNA [NM_032047]	UDP-GlcNAc:betaGal beta-1,3-N-acetylglucosaminyltransferase 5	AAATGTCAACAAAGGGAAAATAAACTATCAGCTTGGATGGTCACTTGAATAGAAGATGGT
	A_33_P3807062	HJURP	3.4236e-23	2.36887e-25	1.54487	up	4.92756	up	3.48861	up	Homo sapiens Holliday junction recognition protein (HJURP), transcript variant 1, mRNA [NM_018410]	Holliday junction recognition protein	CATCAGAGATAACCTCGAGTTCTTGGTGTAGAAATTATGTGAATAAAGTTGCTCAATTAG
	A_33_P3215647	PCED1B	3.4236e-23	2.36608e-25	-3.71592	down	-3.58079	down	-3.4927	down	Homo sapiens PC-esterase domain containing 1B (PCED1B), transcript variant 1, mRNA [NM_138371]	PC-esterase domain containing 1B	ATTCAGATGTCCCCTCATCAGCCCATGCAGGTTTCTTCGTCGAAGACAATTTTATGGTTG
	A_33_P3302957	PLEKHG4	3.56745e-23	2.47544e-25	-2.25198	down	-3.05745	down	-2.72833	down	Homo sapiens pleckstrin homology domain containing, family G (with RhoGef domain) member 4 (PLEKHG4), transcript variant 3, mRNA [NM_001129728]	pleckstrin homology domain containing, family G (with RhoGef domain) member 4	TTGGACTAACTGGCACGGGGCCTCTCTAGGGAAGTCTGGTTGTAGAGCCTGAATAGGCTC
	A_33_P3218980	ENTPD1	3.57136e-23	2.48519e-25	5.02455	up	3.41388	up	4.02289	up	Homo sapiens ectonucleoside triphosphate diphosphohydrolase 1 (ENTPD1), transcript variant 1, mRNA [NM_001776]	ectonucleoside triphosphate diphosphohydrolase 1	GGTTATCTTATAGAGTCTCCTAGAATATTTCATTGGCATTGAGAAGGTGGAAAATGCAAA
	A_23_P216920	NEK6	3.75683e-23	2.62167e-25	2.2621	up	1.85261	up	1.7146	up	Homo sapiens NIMA-related kinase 6 (NEK6), transcript variant 2, mRNA [NM_014397]	NIMA-related kinase 6	AGCCCGACAGTCTCTCCATATGCAGCCTTTCCTCTGTACTTTTCTCCATGGTTGAAATAA
	A_33_P3358183	PTGFR	3.99408e-23	2.80297e-25	5.39332	up	7.15163	up	6.29152	up	Homo sapiens prostaglandin F receptor (FP) (PTGFR), transcript variant 1, mRNA [NM_000959]	prostaglandin F receptor (FP)	AATGGTAATCCAGCTCCTGGCGATAATGTGTGTCTCCTGTATTTGTTGGAGCCCATTTCT
	A_23_P7582	TCF7	3.99408e-23	2.80245e-25	-5.45593	down	-6.8167	down	-5.96447	down	Homo sapiens transcription factor 7 (T-cell specific, HMG-box) (TCF7), transcript variant 1, mRNA [NM_003202]	transcription factor 7 (T-cell specific, HMG-box)	CCCAGAAAACCTCCAGTAGTGGACAACAGGTTTTCACCATAGCCTACGTTAACCCATTTT
	A_24_P750305	LINC01128	3.99829e-23	2.81381e-25	-3.14724	down	-2.58358	down	-3.03312	down	Homo sapiens long intergenic non-protein coding RNA 1128 (LINC01128), transcript variant 1, long non-coding RNA [NR_047519]	long intergenic non-protein coding RNA 1128	AACTTTATCCATTGAGAAATTCCTTAATGAAACAGTATCCAAGAAGTCATTTGCCAGCAG
	A_23_P95130	SLC37A3	4.03866e-23	2.85018e-25	7.77438	up	4.53108	up	4.30162	up	Homo sapiens solute carrier family 37, member 3 (SLC37A3), transcript variant 1, mRNA [NM_207113]	solute carrier family 37, member 3	TTGAGGGATACCTAATTTGCATTCGGTTAGGGGATATTTTTCAACCTCTTGCTTTATACT
	A_23_P208747	PGLYRP1	4.06104e-23	2.87398e-25	5.49782	up	9.96194	up	8.22509	up	Homo sapiens peptidoglycan recognition protein 1 (PGLYRP1), mRNA [NM_005091]	peptidoglycan recognition protein 1	CTATGTGCTCAAAGGACACCGGGATGTGCAGCGTACACTCTCTCCAGGCAACCAGCTCTA
	A_33_P3250566		4.08239e-23	2.89714e-25	-3.85061	down	-4.22255	down	-4.09272	down	T cell receptor alpha variable 8-6 [Source:HGNC Symbol;Acc:HGNC:12151] [ENST00000390443]		TTAACAAGAGTCAAACTTCCTTCCACTTGAGGAAACCCTCAGTCCATATAAGCGACACGG
	A_19_P00315914	lnc-C9orf50-2	4.09311e-23	2.91281e-25	3.91002	up	2.49497	up	3.00301	up	LNCipedia lincRNA (lnc-C9orf50-2), lincRNA [lnc-C9orf50-2:1]	lnc-C9orf50-2:1	GGTGGAGGGTGTGAGCCTGCCCGCCGAGAGGAAGCCAGTTACAGAATCAAAATGACTCAG
	A_33_P3413997		4.18869e-23	2.98909e-25	11.3817	up	6.44521	up	6.88745	up			CTTCGCCTCTGCTTCACAAACTCAAAGGCCTCGTCCAGCTTGACTCGATTAGTCCTCATA
	A_23_P11070	GPR174	4.25452e-23	3.04445e-25	-8.5156	down	-5.73866	down	-5.30981	down	Homo sapiens G protein-coupled receptor 174 (GPR174), mRNA [NM_032553]	G protein-coupled receptor 174	CAGTCCGTTGTTATGATGACCATTGGCGAGTTGATTGGGTTTGTAACTCCGCTTCTGATT
	A_33_P3295283	LPCAT3	4.41317e-23	3.16668e-25	2.17869	up	1.59984	up	1.48163	up	Homo sapiens lysophosphatidylcholine acyltransferase 3 (LPCAT3), mRNA [NM_005768]	lysophosphatidylcholine acyltransferase 3	CTGCTCCACTTTTTCTACCTTGGAACTGTATTAGATAAAATCACTTCTGTTTGTTCAGTT
	A_21_P0002549	lnc-GPR55-2	4.49261e-23	3.23254e-25	3.79006	up	4.07666	up	3.41383	up	LNCipedia lincRNA (lnc-GPR55-2), lincRNA [lnc-GPR55-2:2]	lnc-GPR55-2:2	GTGCAGCTTCTGCAGACCCTGGTGCATCCAGTCATACCAATTCCACATCCACAGCACATG
	A_23_P74778	C1orf54	4.51179e-23	3.25523e-25	2.05363	up	1.03715	up	-1.08377	down	Homo sapiens chromosome 1 open reading frame 54 (C1orf54), transcript variant 3, mRNA [NM_024579]	chromosome 1 open reading frame 54	AGAAGGCTGCTATGACTCTTTGGATGGGAGTCTGGCAAGAGGAAATTGGAAGATAAAATA
	A_33_P3400023		4.61049e-23	3.33554e-25	13.1992	up	6.42082	up	7.78179	up			GGAGAAACTAGCTCCGGAAGCACTTTCTCATGACTCTGCTTAATAAAGGAATAAATAGTA
	A_33_P3775007	ASAP1	4.72815e-23	3.44109e-25	4.14136	up	3.55532	up	3.08911	up	Homo sapiens ArfGAP with SH3 domain, ankyrin repeat and PH domain 1 (ASAP1), transcript variant 2, mRNA [NM_001247996]	ArfGAP with SH3 domain, ankyrin repeat and PH domain 1	GTCATTCTGGCACTACATTTGCTTAAATTGCTATTTTGGCAACAGCACAGAAAACTAATA
	A_33_P3366850		4.72815e-23	3.43066e-25	-5.59856	down	-5.21178	down	-4.69134	down	T cell receptor alpha variable 12-3 [Source:HGNC Symbol;Acc:HGNC:12107] [ENST00000390442]		AACAGTGCTTTTCAATACTTCATGTGGTACAGACAGTATTCCAGAAAAGGCCCTGAGTTG
	A_24_P261760	KLRG1	4.72815e-23	3.44862e-25	-9.33481	down	-6.5432	down	-6.01324	down	Homo sapiens killer cell lectin-like receptor subfamily G, member 1 (KLRG1), mRNA [NM_005810]	killer cell lectin-like receptor subfamily G, member 1	GGTAACCATTGTTATTATTTCTCAGTGGAGGAAAAGGACTGGAATTCTAGTCTGGAATTC
	A_33_P3233550	RTN4	4.75937e-23	3.48077e-25	2.57087	up	1.94517	up	1.78478	up	Homo sapiens reticulon 4 (RTN4), transcript variant 1, mRNA [NM_020532]	reticulon 4	ATTTTACTTTGTTGCAGATAGTCTTGCCGCATCTTGGCAAGTTGCAGAGATGGTGGAGCT
	A_23_P134204	FAM71F1	4.80923e-23	3.5362e-25	5.38801	up	6.41035	up	7.0749	up	Homo sapiens family with sequence similarity 71, member F1 (FAM71F1), transcript variant 1, mRNA [NM_032599]	family with sequence similarity 71, member F1	AGACTTGGTAGACGAGATAAGGAGGACAAGAGAAGGGACACACCCCTGAGAGATGCTCAC
	A_32_P21255	SLC30A4	4.80923e-23	3.53077e-25	-4.11207	down	-3.20865	down	-3.66222	down	Homo sapiens solute carrier family 30 (zinc transporter), member 4 (SLC30A4), mRNA [NM_013309]	solute carrier family 30 (zinc transporter), member 4	GTCAATAAAAGGATTGATGGTCCCTCTAATGAAACCCAGTAGATGTTTGTTGAATTGAAC
	A_23_P206371	NOL3	4.89097e-23	3.60595e-25	3.47456	up	2.29797	up	2.76818	up	Homo sapiens nucleolar protein 3 (apoptosis repressor with CARD domain) (NOL3), transcript variant 2, mRNA [NM_003946]	nucleolar protein 3 (apoptosis repressor with CARD domain)	TCATTGTCATTACTGTTTTAATTGTCTGGCTTCTCTCTGGACTGGGAGCTCAGTGAGGAT
	A_23_P423864	PHC2	4.98637e-23	3.6861e-25	4.52615	up	3.88744	up	3.87993	up	Homo sapiens polyhomeotic homolog 2 (Drosophila) (PHC2), transcript variant 1, mRNA [NM_198040]	polyhomeotic homolog 2 (Drosophila)	ACTCCCACACTTCTTTGCCTATAAATCTTCCTAGCAGCAATTTGAGCTACCTGAGGAGGA
	A_23_P201808	PPAP2B	5.48963e-23	4.06896e-25	2.80093	up	4.6933	up	2.96596	up	Homo sapiens phosphatidic acid phosphatase type 2B (PPAP2B), mRNA [NM_003713]	phosphatidic acid phosphatase type 2B	TATGGATCAACCACATGCACATCCTTACTACAGAATCCGTCCTTTCATTTCAACTTATAG
	A_21_P0014504		5.60664e-23	4.16674e-25	-4.66327	down	-6.8293	down	-6.84758	down	long intergenic non-protein coding RNA 402 [Source:HGNC Symbol;Acc:HGNC:42732] [ENST00000419499]		AGGTCTGTCCTTTTTAATGCTCACCACACTTGAGGTTTCTGTTCACACTTCAAAGGCTGT
	A_24_P332471		5.75797e-23	4.29056e-25	-2.7416	down	-2.73556	down	-2.95707	down	ribosomal protein L12 pseudogene 18 [Source:HGNC Symbol;Acc:HGNC:36750] [ENST00000437175]		CTTCTGCTTCTGCCCTCGAAGCCTTCAAGGAACCACCAAGAAATAGAAAGAAACAGGAAA
	A_24_P97342	PROK2	5.98406e-23	4.47083e-25	11.0739	up	4.94417	up	5.07899	up	Homo sapiens prokineticin 2 (PROK2), transcript variant 2, mRNA [NM_021935]	prokineticin 2	GTTGTAATTTAAACCTTGTTTGTAACTGAAAGGTCGATTGTAATGGATTGCCGTTTGTAC
	A_24_P222911	SRSF7	6.01262e-23	4.50401e-25	-3.73441	down	-3.34634	down	-3.19437	down	Homo sapiens serine/arginine-rich splicing factor 7 (SRSF7), transcript variant 1, mRNA [NM_001031684]	serine/arginine-rich splicing factor 7	CAGAAATGTCAATGAGACTAAAGTGGTTTTGTAAATCTCAGCTATATTTAGCAACACTCC
	A_33_P3382157	PICALM	6.08641e-23	4.58329e-25	3.24874	up	2.03159	up	2.13952	up	Homo sapiens phosphatidylinositol binding clathrin assembly protein (PICALM), transcript variant 1, mRNA [NM_007166]	phosphatidylinositol binding clathrin assembly protein	GCAATTCTGTACATGAGTTTAAGCATTCTTGTTGCATTGTCTCTGCAGATTCTATTTTTG
	A_23_P109488	PIK3IP1	6.08641e-23	4.58196e-25	-3.61873	down	-3.80143	down	-3.1408	down	Homo sapiens phosphoinositide-3-kinase interacting protein 1 (PIK3IP1), transcript variant 1, mRNA [NM_052880]	phosphoinositide-3-kinase interacting protein 1	AGCTGTGCAGCCAGTGATTGGGATCAGCCAGCGGGTGCGGATGAACTCCAAGGAGAAAAA
	A_33_P3283001	LOC728093	6.22405e-23	4.69921e-25	8.22017	up	5.6592	up	5.69769	up	PREDICTED: Homo sapiens putative POM121-like protein 1-like (LOC728093), misc_RNA [XR_425912]	putative POM121-like protein 1-like	ACCAAACGAAATGCCAGCTCGAGCTCCTACAGCTCTACGGAAGGCCTCCCGGAACTAAAG
	A_21_P0007761	MAPKAPK5-AS1	6.28789e-23	4.7598e-25	-2.46887	down	-2.61403	down	-2.45249	down	Homo sapiens MAPKAPK5 antisense RNA 1 (MAPKAPK5-AS1), long non-coding RNA [NR_015404]	MAPKAPK5 antisense RNA 1	TAGGTAATAAACAGGAAAAAGCCCGAGTCTGATGCTAAGAAGAACATAAACAGGATGCTG
	A_23_P18579	PTTG2	6.56673e-23	4.98381e-25	1.25515	up	2.0805	up	1.88276	up	Homo sapiens pituitary tumor-transforming 2 (PTTG2), mRNA [NM_006607]	pituitary tumor-transforming 2	AGACTGTTAAAACAAAAAGTTCTGTTCCTGCCTCAGATGACGCCTATCCAGAAATAGAAA
	A_21_P0007221	LOC101927056	6.57553e-23	5.00346e-25	-3.43731	down	-3.52825	down	-3.19062	down	Homo sapiens uncharacterized LOC101927056 (LOC101927056), transcript variant 1, long non-coding RNA [NR_125395]	uncharacterized LOC101927056	AGGCACTTTGAGCTACAGATGAGTTTAAATACTTTGTGTTTTTCTTAGTCAAACATGTGC
	A_21_P0004617	FLJ27255	6.84531e-23	5.22224e-25	6.28186	up	8.7117	up	8.9679	up		uncharacterized LOC401281	AATAGAACCAACGGAGGAGAGGTGACCATGATACTAACAATAAAAGAAAACTTCCCTGAA
	A_33_P3273490		7.00883e-23	5.3608e-25	-3.51767	down	-3.91098	down	-3.46517	down	T cell receptor beta variable 20/OR9-2 (non-functional) [Source:HGNC Symbol;Acc:HGNC:12197] [ENST00000379435]		TACGAGCAAGGCGTCAAGAAGGACAAGTTTCCCATCAACCATCCAAACCTGACCTTCTCC
	A_23_P32577	DACH1	7.21585e-23	5.53337e-25	6.09007	up	5.51582	up	4.54596	up	Homo sapiens dachshund family transcription factor 1 (DACH1), transcript variant 1, mRNA [NM_080759]	dachshund family transcription factor 1	AATATTAATGTCTAGTTGTTCTATATTATAACCACATTTGCGCTCTATGCAAGCCCTTGG
	A_33_P3245133		7.31618e-23	5.62473e-25	9.78671	up	5.50456	up	5.31209	up			CCCAGAGGCGCGAGTCGCTACCTCACACTGGCTCCTCCCACACTGAGTGAGGTCGGCATG
	A_33_P3264965	LOC101929023	7.41871e-23	5.71817e-25	3.0762	up	3.68778	up	4.82069	up	Homo sapiens uncharacterized LOC101929023 (LOC101929023), transcript variant 1, long non-coding RNA [NR_125972]	uncharacterized LOC101929023	CGAAATAACAAGTCCCTGGATTGCAATTTTGGTTTCTCCTTCTGTTCTCAAACAAAAAAT
	A_19_P00801823	XLOC_l2_014645	7.57925e-23	5.85686e-25	-2.38455	down	-3.11634	down	-2.79089	down	BROAD Institute lincRNA (XLOC_l2_014645), lincRNA [TCONS_l2_00028399]		GAGAACTCCCCACACCAAATTGCTGTTGCAGGCACACATGCACTCTTGCGCTTATCAACC
	A_33_P3230548	KIF14	8.4449e-23	6.54243e-25	2.46013	up	6.78967	up	4.85624	up	Homo sapiens kinesin family member 14 (KIF14), mRNA [NM_014875]	kinesin family member 14	GAGTATGTATAATTTGAAGAGATACTTTGTAACTATGCTTGGGTGATATTGAGCAGTTCC
	A_33_P3521643	PPP1R12C	8.82651e-23	6.85548e-25	2.39227	up	1.91266	up	1.84754	up	Homo sapiens protein phosphatase 1, regulatory subunit 12C (PPP1R12C), transcript variant 2, mRNA [NM_001271618]	protein phosphatase 1, regulatory subunit 12C	GGGGGAGAAGGTATTTTCGAGATAAAGCACAGGCACCACAAATAAAAGTCGTGAAGTTGC
	A_33_P3364263	LBH	8.85266e-23	6.89324e-25	-4.43356	down	-3.40323	down	-3.53677	down	Homo sapiens limb bud and heart development (LBH), mRNA [NM_030915]	limb bud and heart development	ATAACTGCGAAGAGACAGCGAAAGAAAATAAAGAGCAGTAGAGTCCCTGTGGACTCCCAT
	A_21_P0011713	XLOC_l2_006821	9.15242e-23	7.14469e-25	2.79677	up	2.18857	up	1.72098	up	BROAD Institute lincRNA (XLOC_l2_006821), lincRNA [TCONS_l2_00012703]		TTTACCCCAAGCTGTTGTTCCCCCAGTGACCTCCTGGTAATACAGGAGTTACTAAGAAAT
	A_33_P3260669	STK3	9.65848e-23	7.55878e-25	3.34637	up	2.45582	up	2.33934	up	Homo sapiens serine/threonine kinase 3 (STK3), transcript variant 2, mRNA [NM_001256312]	serine/threonine kinase 3	CAGTCATTTCCTAAGCTACATATGGCCATCTTGACAGTGTTTTTTCTTTTGTGTGTTTAA
	A_24_P318656	ITGB3	9.79072e-23	7.68157e-25	-1.44987	down	3.33505	up	2.83485	up	Homo sapiens integrin, beta 3 (platelet glycoprotein IIIa, antigen CD61) (ITGB3), mRNA [NM_000212]	integrin, beta 3 (platelet glycoprotein IIIa, antigen CD61)	ATGTGTGGACACATTGGACCTTTCCTGAGGAAGAGGGACTGTTCTTTTGTCCCAGAAAAG
	A_21_P0008486	LINC01550	9.91875e-23	7.80157e-25	-3.88076	down	-4.44896	down	-3.98834	down	long intergenic non-protein coding RNA 1550 [Source:HGNC Symbol;Acc:HGNC:20111] [ENST00000554822]	long intergenic non-protein coding RNA 1550	TAAGAACAAAGTCTGTCTCTGGAAGCACGGGCGCTGTCTCTGAAGACAAATTGATCGTAA
	A_23_P98085	PTEN	1.02178e-22	8.05691e-25	3.22831	up	1.98334	up	2.10382	up	Homo sapiens phosphatase and tensin homolog (PTEN), mRNA [NM_000314]	phosphatase and tensin homolog	ACAGCAACAATGACTTAACCATATAAATGTGGAGGCTATCAACAAAGAATGGGCTTGAAA
	A_23_P252306	ID1	1.06203e-22	8.40968e-25	7.69149	up	6.29408	up	4.46529	up	Homo sapiens inhibitor of DNA binding 1, dominant negative helix-loop-helix protein (ID1), transcript variant 1, mRNA [NM_002165]	inhibitor of DNA binding 1, dominant negative helix-loop-helix protein	GCAGACATTTTAAAAAATGGTCACGTTTGGTGCTTCTCAGATTTCTGAGGAAATTGCTTT
	A_33_P3329088	PRSS8	1.06203e-22	8.43013e-25	4.22945	up	4.29069	up	4.5317	up	Homo sapiens protease, serine, 8 (PRSS8), mRNA [NM_002773]	protease, serine, 8	TGGCGCTTGGATCTGGGGTGGGAGTAACAGGGCAGAAATGATTAAAATGTTTGAGCACAA
	A_24_P319374	GPA33	1.06203e-22	8.43715e-25	-4.40609	down	-5.00251	down	-4.69401	down	Homo sapiens glycoprotein A33 (transmembrane) (GPA33), mRNA [NM_005814]	glycoprotein A33 (transmembrane)	GGTCTCACCCAACTGCAGTTTACTATTGCTATCTTTTCTGGATGATCAGAAAAATAATTC
	A_23_P88381	NUMB	1.08031e-22	8.60361e-25	3.02845	up	2.2361	up	2.22322	up	Homo sapiens numb homolog (Drosophila) (NUMB), transcript variant 1, mRNA [NM_001005743]	numb homolog (Drosophila)	ATTGATGCCTACTGAAATAAAAAGAGGAAAGGCTGGAAGCTGCAGACAGGATCCCTAGCT
	A_23_P120883	HMOX1	1.08975e-22	8.70032e-25	4.37105	up	3.55967	up	2.29897	up	Homo sapiens heme oxygenase (decycling) 1 (HMOX1), mRNA [NM_002133]	heme oxygenase (decycling) 1	TGGGGAGGGAGGTGTTTAACGGCACTGTGGCCTTGGTCTAACTTTTGTGTGAAATAATAA
	A_21_P0014146	lnc-RASA1-5	1.2458e-22	9.97076e-25	5.53388	up	4.23981	up	4.08411	up	xm63e11.x1 NCI_CGAP_GC6 Homo sapiens cDNA clone IMAGE:2688908 3', mRNA sequence [AW274973]	lnc-RASA1-5:1	ATTTCTTAGTCTCTTTCTTCCCTGGCACTCTTCCTCCGAGGCCAGAAGTCTGAATTACTA
	A_33_P3257165	YPEL1	1.25251e-22	1.00491e-24	-3.95796	down	-2.93217	down	-2.64652	down	Homo sapiens yippee-like 1 (Drosophila) (YPEL1), mRNA [NM_013313]	yippee-like 1 (Drosophila)	AAATGACAAAGTCCAAAACTTTCCAAGCGTATCTGCCGAACTGTCACCGAACGTACAGCT
	A_24_P222655	C1QA	1.26416e-22	1.02173e-24	4.12075	up	12.6448	up	4.53326	up	Homo sapiens complement component 1, q subcomponent, A chain (C1QA), mRNA [NM_015991]	complement component 1, q subcomponent, A chain	GGGTGACCAGGTCTGGGTTGAAAAAGACCCCAAAAAGGGTCACATTTACCAGGGCTCTGA
	A_33_P3414907	NPL	1.26416e-22	1.01929e-24	3.69528	up	3.11306	up	2.79462	up	Homo sapiens N-acetylneuraminate pyruvate lyase (dihydrodipicolinate synthase) (NPL), transcript variant 2, mRNA [NM_001200050]	N-acetylneuraminate pyruvate lyase (dihydrodipicolinate synthase)	AACTCAAAACTCAAAGTTTCAAAGAACCAAAGGACTCTTCCTCTGGGCACCACAAACTTC
	A_21_P0010946	ANTXRLP1	1.26416e-22	1.0177e-24	-5.49963	down	-4.46137	down	-4.20922	down	Homo sapiens anthrax toxin receptor-like pseudogene 1 (ANTXRLP1), transcript variant 2, non-coding RNA [NR_103828]	anthrax toxin receptor-like pseudogene 1	AGTACTTCATTGAAGTCAGCTTGAACAACGGCAAAACATTCAAGAGCAATGTCAGCATCA
	A_33_P3329356	lnc-HADH-1	1.2686e-22	1.02782e-24	-3.75587	down	-5.73492	down	-5.36197	down	LNCipedia lincRNA (lnc-HADH-1), lincRNA [lnc-HADH-1:7]	lnc-HADH-1:7	CGGCTTCAGGAGTACAAGTTTCCCCATCAAAGGTTTGGAATAAATTACACTAAAAAATTG
	A_19_P00316340	LOC100506860	1.2848e-22	1.04348e-24	9.48445	up	7.60792	up	5.85054	up	Homo sapiens uncharacterized LOC100506860 (LOC100506860), long non-coding RNA [NR_109780]	uncharacterized LOC100506860	TTGCCTTCACGGAACCTGGATAAACTACAGTTCCCGAATTAAACTTGTTTCTGATGAACT
	A_23_P330070	TFPI	1.2886e-22	1.04911e-24	4.68263	up	8.42577	up	6.26351	up	Homo sapiens tissue factor pathway inhibitor (lipoprotein-associated coagulation inhibitor) (TFPI), transcript variant 2, mRNA [NM_001032281]	tissue factor pathway inhibitor (lipoprotein-associated coagulation inhibitor)	GCCTTCTGCATTCATGCATCCATGTTCTTTCTAGGATTGGATAGCATTTCATGCCTATGT
	A_19_P00812329	lnc-C9orf50-2	1.47362e-22	1.20318e-24	5.09242	up	2.93858	up	3.78301	up	LNCipedia lincRNA (lnc-C9orf50-2), lincRNA [lnc-C9orf50-2:1]	lnc-C9orf50-2:1	ATTTCCATCGATGGCCTGCATGAGGAATGGGCGGTGAGCATCCTCCTTCCATCTCCAGCT
	A_21_P0008484	LINC01550	1.47362e-22	1.20555e-24	-3.54269	down	-3.86871	down	-3.785	down	long intergenic non-protein coding RNA 1550 [Source:HGNC Symbol;Acc:HGNC:20111] [ENST00000512901]	long intergenic non-protein coding RNA 1550	CATCTTTCCCATGCCCTTTAAAACACGTTATCAAATAGCAACAGGTGGTGCAATAACTAG
	A_24_P333106		1.49818e-22	1.23155e-24	-3.62481	down	-3.30803	down	-3.53892	down			TGAGTCCGCCATGAAGAAGATAGAAGACAACACCACACTTGTGTTCACGGTGGATGTTAA
	A_23_P392962	GRAP	1.49818e-22	1.22988e-24	-4.77233	down	-3.85649	down	-3.64458	down	Homo sapiens GRB2-related adaptor protein (GRAP), mRNA [NM_006613]	GRB2-related adaptor protein	TGAACATGGAGGATGACCAGAACTGGTACAAGGCCGAGCTCCGGGGTGTCGAGGGATTTA
	A_24_P272160	NBEAL2	1.57503e-22	1.30093e-24	4.46801	up	4.29956	up	4.28451	up	PREDICTED: Homo sapiens neurobeachin-like 2 (NBEAL2), transcript variant X5, mRNA [XM_006713072]	neurobeachin-like 2	CACCTCACTCGGCTCATTCAGAACAGCAAGGTCCTGGACCAAGACACAGACGCCATTGCA
	A_33_P3211213	TSEN34	1.57503e-22	1.29899e-24	2.45445	up	1.42529	up	1.62458	up	Homo sapiens TSEN34 tRNA splicing endonuclease subunit (TSEN34), transcript variant 3, mRNA [NM_001282332]	TSEN34 tRNA splicing endonuclease subunit	CATCTGTTTTCTACAGGGTTTAAGTCTCAGGAGGTCTCAATAAACTTGGTATATAAATGT
	A_21_P0006046		1.7011e-22	1.40842e-24	4.25611	up	3.62366	up	3.66354	up	DA128674 BRACE3 Homo sapiens cDNA clone BRACE3052328 5', mRNA sequence [DA128674]		CAGGTGGCACAATAGACATATTACCTTCTTTGGTGGAGTCTGTAAAGACATTACTAAAGT
	A_33_P3343210	SLC25A37	1.75052e-22	1.45278e-24	7.67891	up	5.32847	up	5.98459	up	Homo sapiens solute carrier family 25 (mitochondrial iron transporter), member 37 (SLC25A37), mRNA [NM_016612]	solute carrier family 25 (mitochondrial iron transporter), member 37	TAGTATTACGGCTGGGACTCTCCAGCTGTTTTTGTTGTTGTTATGTTTTTAAGAGGGTTG
	A_23_P210210	EPAS1	1.76664e-22	1.46964e-24	3.33525	up	4.83174	up	4.5913	up	Homo sapiens endothelial PAS domain protein 1 (EPAS1), mRNA [NM_001430]	endothelial PAS domain protein 1	ACACTGAAAAATATTCCAAGCTTCATATTAACCCTACCTGTCAACGTAACGATTTCATGA
	A_23_P145965	TPST1	1.88883e-22	1.57502e-24	5.61698	up	8.51809	up	10.1714	up	Homo sapiens tyrosylprotein sulfotransferase 1 (TPST1), mRNA [NM_003596]	tyrosylprotein sulfotransferase 1	ACGTTTGTTTTCAAGGAGAGGGTTTAAAAATGGGATCCTGTAAGCAGACTTGGGCAGTCT
	A_21_P0014157		1.97105e-22	1.64746e-24	1.86182	up	1.20453	up	1.2422	up	CJ095_HUMAN (Q9H7T3) Protein C10orf95, partial (6%) [THC2616237]		TTATTCACTAAATACTGCTGGTCAGCTGGGTCCACTGGCGAACCTCACATCAATAAACCT
	A_33_P3386765	ABHD14A	2.02566e-22	1.69711e-24	-2.59434	down	-2.55438	down	-2.40587	down	Homo sapiens abhydrolase domain containing 14A (ABHD14A), mRNA [NM_015407]	abhydrolase domain containing 14A	GCCAGGACTCCTCATTTCATCTCACAGACACAATAAAAAAGCATATTTGTCCTGCCTGGG
	A_23_P372255	ITPKB	2.03007e-22	1.7048e-24	-3.74853	down	-2.78392	down	-2.51907	down	Homo sapiens inositol-trisphosphate 3-kinase B (ITPKB), mRNA [NM_002221]	inositol-trisphosphate 3-kinase B	TCAGTTGTATTTAGCTTTGAGTTTCTCTGCATCTGTCCACCCCATGTGTATATAACCCAG
	A_19_P00318297	APTR	2.04603e-22	1.72223e-24	4.79063	up	3.77845	up	4.23241	up	Alu-mediated CDKN1A/p21 transcriptional regulator (non-protein coding) [Source:HGNC Symbol;Acc:HGNC:44173] [ENST00000440088]	Alu-mediated CDKN1A/p21 transcriptional regulator (non-protein coding)	TTTAATGCATTTTATGGCATTTGGAGGCCCTCCAGTGGACAAATACTATACCTGAAAAAA
	A_23_P106617	WFDC1	2.08044e-22	1.7553e-24	3.91474	up	16.053	up	9.39506	up	Homo sapiens WAP four-disulfide core domain 1 (WFDC1), transcript variant 1, mRNA [NM_021197]	WAP four-disulfide core domain 1	AAGCAGCTAGGTTGCAAGAACATTCCTCTACTTTCTGCTAAGCCTTGGAAACAGTTGGGA
	A_23_P210708	SIRPA	2.09547e-22	1.77211e-24	2.94361	up	2.45701	up	2.44695	up	Homo sapiens signal-regulatory protein alpha (SIRPA), transcript variant 1, mRNA [NM_001040022]	signal-regulatory protein alpha	AGGGGGAAATAAGGGAATAAGGCCAAGGAAGATGTATAGCTTTAGCTTTAGCCTGGCAAC
	A_33_P3454679		2.48755e-22	2.10975e-24	4.75408	up	4.02919	up	3.33427	up	PREDICTED: Homo sapiens glutenin, high molecular weight subunit DX5-like (LOC100996433), mRNA [XM_006710179]		ACAGAGAAGAAGAAGCCGCAGCAGCCCCAGTGCCGACCAGCAGGGGGGCACGGGACAGAG
	A_21_P0013805	LOC389906	2.48755e-22	2.1135e-24	-2.76848	down	-2.71937	down	-2.79826	down	Homo sapiens zinc finger protein 839 pseudogene (LOC389906), non-coding RNA [NR_034031]	zinc finger protein 839 pseudogene	CTGAATATTGGACATGCCCATCTTAGACATTCCAGCCCATTCTGAAATTCCACATCGATT
	A_33_P3230723	KIF1B	2.55381e-22	2.17483e-24	4.14391	up	5.27575	up	4.186	up	Homo sapiens kinesin family member 1B (KIF1B), transcript variant 2, mRNA [NM_183416]	kinesin family member 1B	AATTATAACACTGGAGGTCAGTTAGAGGGCAATGCAGCCACTTCCTATCAGAAGCAGACT
	A_21_P0000646	LINC00900	2.58317e-22	2.21248e-24	4.87285	up	4.36941	up	2.50973	up	Homo sapiens long intergenic non-protein coding RNA 900 (LINC00900), long non-coding RNA [NR_034148]	long intergenic non-protein coding RNA 900	AGGATTTCTAAACCATTTCTGTAAGTCAGCCCTTGAGAACTTGTAGATTTTCTCATCATT
	A_33_P3308101		2.58317e-22	2.2111e-24	5.54014	up	4.05137	up	3.79539	up	PREDICTED: Homo sapiens helicase SRCAP-like (LOC101929190), misc_RNA [XR_428276]		CTGCCTCCCAGCAGCCAGTGTGCGGCCCAGCTCCTCCGTCACGGTGGCCTGTTGAGGCCC
	A_33_P3257297	CFAP58	2.58317e-22	2.2151e-24	5.1574	up	3.81182	up	4.74475	up	Homo sapiens cilia and flagella associated protein 58 (CFAP58), mRNA [NM_001008723]	cilia and flagella associated protein 58	CAGGCCCGGAATGGGAAAATCTATTCCAAAGAGACACACTAATAAATACTTCATTATAAA
	A_32_P40377	LOC389906	2.58475e-22	2.22156e-24	-3.09075	down	-2.91912	down	-2.86489	down	Homo sapiens zinc finger protein 839 pseudogene (LOC389906), non-coding RNA [NR_034031]	zinc finger protein 839 pseudogene	TCAGACATTCCAGCCCATTCTGAAATTCCACATCGATTCACCTGACCAAAGTCTGAAGTT
	A_21_P0001646	lnc-TOMM20-1	2.66088e-22	2.29224e-24	2.37908	up	2.69937	up	3.08226	up	LNCipedia lincRNA (lnc-TOMM20-1), lincRNA [lnc-TOMM20-1:3]	lnc-TOMM20-1:3	AAATGATCCCTGTGACGATGTTGAAAACAGAGCCTGCTCAGCCTTAATAAACCAGAGCTG
	A_33_P3374338	XLOC_l2_013410	2.72255e-22	2.35072e-24	9.40615	up	5.30051	up	5.3487	up	BROAD Institute lincRNA (XLOC_l2_013410), lincRNA [TCONS_l2_00025878]		TGCAAAGGCCGACTGGAGGTCAAGTTCTGGGCCTGAAGAGGCCACCAAAAGTCAAAAGCG
	A_23_P99204	MAPKAPK5-AS1	2.76014e-22	2.38862e-24	-2.78676	down	-3.11115	down	-2.8664	down	Homo sapiens MAPKAPK5 antisense RNA 1 (MAPKAPK5-AS1), long non-coding RNA [NR_015404]	MAPKAPK5 antisense RNA 1	GATGGAAGTGGAAGATTCAGAGTTCATTTCTATCTAGGTTAATTTGAGACATACCAGAGC
	A_24_P38951	RELT	2.78115e-22	2.41228e-24	2.4682	up	2.03526	up	1.84253	up	Homo sapiens RELT tumor necrosis factor receptor (RELT), transcript variant 1, mRNA [NM_032871]	RELT tumor necrosis factor receptor	ATTGCCCTATCCTTGTGTCTCCACCCCCTTCCATGTGTTGAATAATAAAAGGTGGGAAAG
	A_23_P137765	PAFAH2	2.88583e-22	2.50877e-24	-4.6747	down	-4.10211	down	-3.58747	down	Homo sapiens platelet-activating factor acetylhydrolase 2, 40kDa (PAFAH2), mRNA [NM_000437]	platelet-activating factor acetylhydrolase 2, 40kDa	AACTGGGTACTTTGATCTTAGATTTGATCTTAAAATCACTTTGGGACTGGGATCCCTTGC
	A_33_P3374162		3.15287e-22	2.74714e-24	-7.16989	down	-5.61665	down	-5.56829	down	T cell receptor beta variable 27 [Source:HGNC Symbol;Acc:HGNC:12208] [ENST00000390399]		AGATGTTCCTGAAGGGTACAAAGTCTCTCGAAAAGAGAAGAGGAATTTCCCCCTGATCCT
	A_23_P46604	NIPAL3	3.16928e-22	2.76768e-24	-3.41222	down	-2.65258	down	-2.63119	down	Homo sapiens NIPA-like domain containing 3 (NIPAL3), mRNA [NM_020448]	NIPA-like domain containing 3	TGGAGATCATTCTGTTCTGCTTGCTGCTCTACTTCTACAAGGAGAAGAACGCCAACAACA
	A_33_P3409649	ADAMTS2	3.23689e-22	2.83311e-24	8.29234	up	9.34337	up	10.8464	up	Homo sapiens ADAM metallopeptidase with thrombospondin type 1 motif, 2 (ADAMTS2), transcript variant 2, mRNA [NM_021599]	ADAM metallopeptidase with thrombospondin type 1 motif, 2	TCACCTCTTCTACAATGTCACGGTCTTTGGCCGAGACCTGCACCTGCGGCTGCGGCCCAA
	A_23_P24784	TNNI2	3.24274e-22	2.84462e-24	4.23031	up	2.81563	up	2.50036	up	Homo sapiens troponin I type 2 (skeletal, fast) (TNNI2), transcript variant 1, mRNA [NM_003282]	troponin I type 2 (skeletal, fast)	GGAGCGGGACCTGCGAGACGTGGGTGACTGGAGGAAGAACATCGAGGAGAAGTCTGGCAT
	A_23_P102122	ARPC2	3.3134e-22	2.91314e-24	2.33173	up	1.76459	up	1.71205	up	Homo sapiens actin related protein 2/3 complex, subunit 2, 34kDa (ARPC2), transcript variant 1, mRNA [NM_152862]	actin related protein 2/3 complex, subunit 2, 34kDa	AAGCGGCTGGCAACTGAAGGCTGGAACACTTGCTACTGGATAATCGTAGCTTTTAATGTT
	A_21_P0005447	PAXIP1-AS1	3.35646e-22	2.95761e-24	-2.5656	down	-2.67871	down	-2.43284	down	Homo sapiens PAXIP1 antisense RNA 1 (head to head) (PAXIP1-AS1), long non-coding RNA [NR_028090]	PAXIP1 antisense RNA 1 (head to head)	TAAGGCCATGATGATGAACGCAGCCTTTCTCGTTTATTTCCAATCCCACAACAAACCGGA
	A_33_P3330608	PRAM1	3.35723e-22	2.96491e-24	4.94512	up	3.36634	up	3.03649	up	Homo sapiens PML-RARA regulated adaptor molecule 1 (PRAM1), mRNA [NM_032152]	PML-RARA regulated adaptor molecule 1	CGGGAAAGTCACAGAGCTGCCTGGGCTTGTACCTGGCCACATAAAGCCCCAGTTTAAAGC
	A_23_P99275	KLRB1	3.45589e-22	3.05885e-24	-3.8762	down	-4.76052	down	-4.58355	down	Homo sapiens killer cell lectin-like receptor subfamily B, member 1 (KLRB1), mRNA [NM_002258]	killer cell lectin-like receptor subfamily B, member 1	TCAACCCTTGGAATAACAGTCTAGCTGATTGTTCCACCAAAGAATCCAGCCTGCTGCTTA
	A_33_P3268726	lnc-ELF2-2	3.56605e-22	3.16339e-24	5.44135	up	4.93292	up	6.19417	up	LNCipedia lincRNA (lnc-ELF2-2), lincRNA [lnc-ELF2-2:3]	lnc-ELF2-2:3	GTTTTCATCTAGGAGGTGGCTTGAGATGGATTCATGGCAAATCACAATAAATTATTTATC
	A_33_P3401243	OLFML2B	3.60172e-22	3.20213e-24	4.4938	up	4.16784	up	2.81896	up	Homo sapiens olfactomedin-like 2B (OLFML2B), transcript variant 1, mRNA [NM_001297713]	olfactomedin-like 2B	ACACCCTTGTCCCCACAAGCAGAAGCACAGAGGGGTCACTAGCACCTTGTGTGTATGTGT
	A_21_P0002850	LOC102724231	3.64976e-22	3.25204e-24	5.05227	up	4.53139	up	4.26186	up	long intergenic non-protein coding RNA 694 [Source:HGNC Symbol;Acc:HGNC:44570] [ENST00000416124]	uncharacterized LOC102724231	TCACAGGAACATGCCCAGTGCTTTCAAACCCAGTAAAATTTTACTTAGATTTTGACATAA
	A_23_P105562	VWF	3.68322e-22	3.29386e-24	1.618	up	4.31447	up	3.39548	up	Homo sapiens von Willebrand factor (VWF), mRNA [NM_000552]	von Willebrand factor	TGTACCATGAGGTTCTCAATGCCATGGAGTGCAAATGCTCCCCCAGGAAGTGCAGCAAGT
	A_33_P3215929	PRR5	3.68322e-22	3.29637e-24	-4.22513	down	-3.31566	down	-3.33552	down	Homo sapiens proline rich 5 (renal) (PRR5), transcript variant 2, mRNA [NM_015366]	proline rich 5 (renal)	AGGACAGAAGCTGCTGGACTCACTGGCAGAGACCTGGGACTTCTTCTTCAGTGACGTGCT
	A_23_P361014	TSHZ3	3.7578e-22	3.37053e-24	4.25481	up	3.10228	up	2.6208	up	Homo sapiens teashirt zinc finger homeobox 3 (TSHZ3), mRNA [NM_020856]	teashirt zinc finger homeobox 3	TTTGGTTGTTGACAATGAAGCACCATTATGTGACTCTTCATATAACCCTTTTTTCTACGG
	A_23_P63390	FCGR1B	3.94297e-22	3.54438e-24	4.81897	up	4.57061	up	4.39918	up	Homo sapiens Fc fragment of IgG, high affinity Ib, receptor (CD64) (FCGR1B), transcript variant 1, mRNA [NM_001017986]	Fc fragment of IgG, high affinity Ib, receptor (CD64)	TTTAGTGAACACTGTTCTCTGGGTGACAATACGTAAAGAACTGAAAAGAAAGAAAAAGTG
	A_23_P156180	SLC22A4	4.00677e-22	3.60963e-24	4.68894	up	4.4465	up	4.44131	up	Homo sapiens solute carrier family 22 (organic cation/zwitterion transporter), member 4 (SLC22A4), mRNA [NM_003059]	solute carrier family 22 (organic cation/zwitterion transporter), member 4	AAACAAGAGACTCAATGGAGACAGAAGAAAATCCCAAGGTTCTAATAACTGCATTCTGAA
	A_23_P357881	CD8B	4.07553e-22	3.67961e-24	-11.9377	down	-8.62646	down	-7.21293	down	Homo sapiens CD8b molecule (CD8B), transcript variant 4, mRNA [NM_172102]	CD8b molecule	AGAGGTGGAACAGGAGAAGATAGCTGTGTTTCGGGATGCAAGCCGGTTCATTCTCAATCT
	A_21_P0014281		4.25488e-22	3.84993e-24	-4.40981	down	-5.18717	down	-5.16886	down	BX096603 Soares_testis_NHT Homo sapiens cDNA clone IMAGp998H151782, mRNA sequence [BX096603]		GGATATGCAGTCTGTGCCTTTCATTGCCTTCCTGGAAAATAATAACTAAACTCTTCCTCA
	A_23_P431505	lnc-AF131215.2.1-1	4.32741e-22	3.92408e-24	-5.22588	down	-4.48583	down	-4.3159	down	Homo sapiens primary neuroblastoma cDNA, clone:Nbla00437, full insert sequence. [AB073660]	lnc-AF131215.2.1-1:1	TTACAGCGTAACATGTGTACTTCAAATTGTAGTAGTGACTGGAAATTTAGGATTCTGTTG
	A_23_P31273	AMPH	4.38134e-22	3.98162e-24	8.70029	up	12.5166	up	10.3366	up	Homo sapiens amphiphysin (AMPH), transcript variant 1, mRNA [NM_001635]	amphiphysin	TGCAGAAGGCTACATATACATAGTTGCTTCTTTCCTTTCCATTGTAGCTCTTTGCCTCTC
	A_24_P55225	RSPH9	4.42161e-22	4.02694e-24	3.00037	up	3.92294	up	3.64575	up	Homo sapiens radial spoke head 9 homolog (Chlamydomonas) (RSPH9), transcript variant 1, mRNA [NM_152732]	radial spoke head 9 homolog (Chlamydomonas)	TTCAAGACCCCTTTTGGACCCACCCATGTCAATCGGACCTTTGAAGGACTGTCCTTGTCT
	A_24_P385732	SLC51A	4.57157e-22	4.17253e-24	39.665	up	51.6217	up	23.0621	up	Homo sapiens solute carrier family 51, alpha subunit (SLC51A), mRNA [NM_152672]	solute carrier family 51, alpha subunit	ACGAATGTACTACCGAAGGAAAGACCACAAGGTTGGGTATGAAACTTTCTCTTCTCCAGA
	A_24_P67681		5.0587e-22	4.62711e-24	3.58046	up	4.67918	up	3.17608	up	high mobility group box 3 pseudogene 27 [Source:HGNC Symbol;Acc:HGNC:39319] [ENST00000589177]		TCTATAAGTCGAAAGGAAAGTCTGATGGCGCAAAGGGTCCTGCTAAAGTTGCCCAGAAAA
	A_24_P80181	TMEM127	5.29262e-22	4.8515e-24	2.97741	up	1.74122	up	1.63485	up	Homo sapiens transmembrane protein 127 (TMEM127), transcript variant 1, mRNA [NM_017849]	transmembrane protein 127	CATCCTGTGGGAGGAAATAGACTTCTTTGGGCTGTGGCTTGCAGAACAAACTACACTTTT
	A_23_P343366	MAB21L3	5.34879e-22	4.91353e-24	5.55925	up	5.05195	up	5.55603	up	Homo sapiens mab-21-like 3 (C. elegans) (MAB21L3), mRNA [NM_152367]	mab-21-like 3 (C. elegans)	CATAGCCCTCTCTTTGCTTCCCATGCCATGGGCCATGGATGGAACTTCCTTATATATTTA
	A_32_P50417		5.35996e-22	4.94117e-24	6.92473	up	4.14972	up	3.74099	up	Homo sapiens cDNA FLJ35212 fis, clone PROST1000136. [AK092531]		AATCAGCCTGAATTTTCTAAATGCAACTTCATCATTCTGCAAATCAGCAAGACTCACTTC
	A_23_P399156	IL12RB1	5.35996e-22	4.94492e-24	-2.4152	down	-2.2494	down	-1.94775	down	Homo sapiens interleukin 12 receptor, beta 1 (IL12RB1), transcript variant 2, mRNA [NM_153701]	interleukin 12 receptor, beta 1	GGAAGATGCCCTATCTCTCGGGTGCTGCCTACAACGTGGCTGTCATCTCCTCGAACCAAT
	A_33_P3331511	LINC00173	5.37047e-22	4.96521e-24	8.48374	up	2.8754	up	4.72686	up	Homo sapiens long intergenic non-protein coding RNA 173 (LINC00173), transcript variant 1, long non-coding RNA [NR_027345]	long intergenic non-protein coding RNA 173	AGTGTGGCTTTGAGAAAATAAAATGGCCACCTTGCTCCGCTGTTCTTTCTTTGTAAAAAA
	A_33_P3299898	CTSLP2	5.41404e-22	5.01616e-24	3.59196	up	3.05483	up	2.95496	up	Homo sapiens cathepsin L pseudogene 2 (CTSLP2), non-coding RNA [NR_033407]	cathepsin L pseudogene 2	AATCCTTCACTCCTCCTGGCTGCCTTTTTCCTGGGAATTGCCTCAGCTGCTCTAACACGT
	A_19_P00321597	LINC01550	5.53326e-22	5.13752e-24	-4.32686	down	-4.34535	down	-3.57473	down	long intergenic non-protein coding RNA 1550 [Source:HGNC Symbol;Acc:HGNC:20111] [ENST00000556462]	long intergenic non-protein coding RNA 1550	AAGGTTACATGTAGACAGAATGAGGCCCAGTAGACTTTTCACCAGGAAGGCAGACTTTGT
	A_23_P319005	HMP19	5.54381e-22	5.15825e-24	4.47299	up	6.15794	up	7.69926	up	Homo sapiens HMP19 protein (HMP19), mRNA [NM_015980]	HMP19 protein	GAGAATTGGTTATTTGAGATGTGGTACTGCTTCCTCACAAGTCTCCCACAGGCCATGTAA
	A_24_P96474	LDOC1L	5.60686e-22	5.22797e-24	-3.09239	down	-3.4577	down	-3.46504	down	Homo sapiens leucine zipper, down-regulated in cancer 1-like (LDOC1L), mRNA [NM_032287]	leucine zipper, down-regulated in cancer 1-like	AAACCTTTGAGGCTTTTACTACATATTGACAAAATGGTTTCCGGAAATATTTGTATCCCC
	A_33_P3228305	ARHGAP26	5.81368e-22	5.43228e-24	3.50659	up	2.24526	up	2.52545	up	Homo sapiens Rho GTPase activating protein 26 (ARHGAP26), transcript variant 1, mRNA [NM_015071]	Rho GTPase activating protein 26	CATGTGGTTGGTTTATGTGACAATCCCTATGAAATGAGTGGACGTATGATTTTTGAATTA
	A_23_P112311	TRIM32	5.87004e-22	5.49651e-24	-4.09356	down	-2.95689	down	-3.08165	down	Homo sapiens tripartite motif containing 32 (TRIM32), transcript variant 1, mRNA [NM_012210]	tripartite motif containing 32	AGACATCATATTCCCGTAACATTATGTCTCAGTCTGATCGTCTTTACCAGTATGAAAGTC
	A_33_P3316456	NPL	5.98202e-22	5.61315e-24	3.01299	up	3.04304	up	2.73217	up	Homo sapiens N-acetylneuraminate pyruvate lyase (dihydrodipicolinate synthase) (NPL), transcript variant 2, mRNA [NM_001200050]	N-acetylneuraminate pyruvate lyase (dihydrodipicolinate synthase)	AATACACCAGCTCATTTGGCTGCTCAGTCTAACTCTAGAATGGATGCTTTTGAATTCATT
	A_33_P3318053	CRHR1-IT1	6.04982e-22	5.6887e-24	-3.39691	down	-4.13905	down	-3.61354	down	Homo sapiens CRHR1 intronic transcript 1 (non-protein coding) (CRHR1-IT1), transcript variant 2, long non-coding RNA [NR_026906]	CRHR1 intronic transcript 1 (non-protein coding)	CATGTGCTTCTGAATGTATTGAACTTCTTGAAATCTCTTTCCTCATCAATTTTAGCAGAG
	A_23_P159125	SLC16A5	6.34873e-22	5.98351e-24	3.16187	up	2.11386	up	2.31499	up	Homo sapiens solute carrier family 16 (monocarboxylate transporter), member 5 (SLC16A5), transcript variant 1, mRNA [NM_004695]	solute carrier family 16 (monocarboxylate transporter), member 5	ACTATCTGCCATGTGAGTTGGGCAAATTGTTGACCACCTCTGAGCCTTGAAAAAGTAGGA
	A_33_P3262789	REEP6	6.34873e-22	5.9948e-24	-1.94015	down	-2.57923	down	-2.49668	down	Homo sapiens receptor accessory protein 6 (REEP6), mRNA [NM_138393]	receptor accessory protein 6	AGCACTACTGGTGCCTGAAACACCTGGCCTGCTAGGAGGCTCCAATAAAGCTAACCCGGA
	A_23_P144071	COL7A1	6.43504e-22	6.08898e-24	2.81452	up	4.12828	up	4.51867	up	Homo sapiens collagen, type VII, alpha 1 (COL7A1), mRNA [NM_000094]	collagen, type VII, alpha 1	TTCTGTGGAGGAGTACCAGGACCCTGAAGCTCCTTGGGATAGTGATGACCCCTGTTCCCT
	A_23_P150935	TROAP	6.56412e-22	6.23217e-24	2.14442	up	5.15954	up	3.40716	up	Homo sapiens trophinin associated protein (TROAP), transcript variant 1, mRNA [NM_005480]	trophinin associated protein	TGCCCTGCCGTACTTCTTCCTTTTAGCCCTTATTTATTGTCGGTCTGCCCATGGGACTGG
	A_23_P8571	SSC4D	6.56412e-22	6.237e-24	3.77045	up	2.72239	up	2.90543	up	Homo sapiens scavenger receptor cysteine rich family, 4 domains (SSC4D), mRNA [NM_080744]	scavenger receptor cysteine rich family, 4 domains	TGTAGCCACCAGTTCATAGGTGCCAAGTCAATAAAGCATTGTCCCCCGTCTCTTATAACT
	A_33_P3298587	SBNO2	6.70614e-22	6.38516e-24	4.79426	up	3.61965	up	3.46725	up	Homo sapiens strawberry notch homolog 2 (Drosophila) (SBNO2), transcript variant 1, mRNA [NM_014963]	strawberry notch homolog 2 (Drosophila)	CGCCTGCGGTTTCTATGTATTTATAGCAAGTTCTGATGTACATATGTAAAGGACTTTTTT
	A_33_P3747204	LOC728175	6.77934e-22	6.46822e-24	3.90708	up	5.06626	up	5.39951	up	Homo sapiens uncharacterized LOC728175 (LOC728175), long non-coding RNA [NR_040108]	uncharacterized LOC728175	CCACAGAATTATGAGAGATAAAAAATCATTGTCTTAAGCCACTAAGTCTGTTATGCAGCA
	A_24_P7121	NSUN7	6.99686e-22	6.70334e-24	15.4801	up	12.0121	up	11.8826	up	Homo sapiens NOP2/Sun domain family, member 7 (NSUN7), mRNA [NM_024677]	NOP2/Sun domain family, member 7	ATCTACAAGTCATTTCAAATAGCACACAGGAATCAAACTTTGGTAAATCATTTCTGAGGC
	A_23_P165136	LRRC25	6.99686e-22	6.69117e-24	2.41407	up	1.97129	up	1.63665	up	Homo sapiens leucine rich repeat containing 25 (LRRC25), mRNA [NM_145256]	leucine rich repeat containing 25	CACCCTCCTGTGGATGTACAGGCAGTGCTCAATAAATGCTTCGAGGCTGATGAGGCTGCT
	A_23_P65757	CCNB2	7.01404e-22	6.73364e-24	2.29002	up	5.56919	up	3.48205	up	Homo sapiens cyclin B2 (CCNB2), mRNA [NM_004701]	cyclin B2	TTGATTTTGTACATAGTCCTCTGGTCTATCTCATGAAACCTCTTCTCAGACCAGTTTTCT
	A_32_P52785	DAAM2	7.08081e-22	6.81169e-24	8.52615	up	28.5383	up	22.754	up	Homo sapiens dishevelled associated activator of morphogenesis 2 (DAAM2), transcript variant 2, mRNA [NM_015345]	dishevelled associated activator of morphogenesis 2	GTCATCAACCTAACAAACACAACCTTCTCAGCAGCATTTCTCCCCTGTGATGGAAATAAA
	A_23_P51231	RUNX3	7.43696e-22	7.16896e-24	-2.98287	down	-3.33408	down	-3.28639	down	Homo sapiens runt-related transcription factor 3 (RUNX3), transcript variant 1, mRNA [NM_001031680]	runt-related transcription factor 3	GTACAGACAGCCTGGGCTGGTAAAAGTAGGTCCTTATTTACAAGGCTGCGTTAAAGTTGT
	A_33_P3279629	UCN2	7.44754e-22	7.19385e-24	4.41767	up	4.41815	up	5.25393	up	Homo sapiens urocortin 2 (UCN2), mRNA [NM_033199]	urocortin 2	AGCATTGTGTATATAGCAGACATGGAGGTCCTGCAGCAGGAGGTGCTCAATAAACACAAA
	A_33_P3368471	NT5DC1	8.055e-22	7.81238e-24	-2.66432	down	-2.07484	down	-2.08812	down	Homo sapiens 5'-nucleotidase domain containing 1 (NT5DC1), mRNA [NM_152729]	5'-nucleotidase domain containing 1	TTACAAATGCATTGAAGCCTGGTTTCTTCTCCCACTTACCAAGTCAGAGACCTTTCCGGA
	A_23_P112531	FAM102A	8.055e-22	7.81133e-24	-3.53097	down	-4.87056	down	-4.40397	down	Homo sapiens family with sequence similarity 102, member A (FAM102A), transcript variant 1, mRNA [NM_001035254]	family with sequence similarity 102, member A	AGTATATCAGAGATATTTTTGGAAAGGAGTTGGTCTATGCAATGTCAGTTTGGAATCTTC
	A_23_P19182	REEP2	8.22707e-22	7.99548e-24	2.96602	up	3.69546	up	4.18161	up	Homo sapiens receptor accessory protein 2 (REEP2), transcript variant 2, mRNA [NM_016606]	receptor accessory protein 2	CTCCCGGTTCCTTGGGAAGAGGGTGCCCATTGGACCTTTGGCACTGGATGAGCCAATAAA
	A_33_P3380063	ADAMTSL4	8.36632e-22	8.1473e-24	3.48395	up	2.4464	up	2.37089	up	Homo sapiens ADAMTS-like 4 (ADAMTSL4), transcript variant 2, mRNA [NM_025008]	ADAMTS-like 4	AGAGGCCTGTGACATGGGGCCCTGTACTACTGCCTGGTTCCACAGCGACTGGAGCTCCAA
	A_23_P256342	SNX13	8.43803e-22	8.23376e-24	2.41337	up	2.14532	up	2.09996	up	Homo sapiens sorting nexin 13 (SNX13), mRNA [NM_015132]	sorting nexin 13	ATTAGCCAGGTGAATGATCCTTGAAACATCTCTTTCAGGTCTGGAGAAAGAGACAGAATG
	A_24_P185029	SH2B1	9.42709e-22	9.21747e-24	-2.56704	down	-2.27148	down	-2.23529	down	Homo sapiens SH2B adaptor protein 1 (SH2B1), transcript variant 2, mRNA [NM_015503]	SH2B adaptor protein 1	ACCTGTGGTTCCAGTCCATTTTCGATATGCTCGAGCACTTCCGGGTGCACCCCATCCCTT
	A_24_P935881	SERF1B	9.91384e-22	9.71294e-24	-2.17264	down	-2.4274	down	-2.07047	down	Homo sapiens small EDRK-rich factor 1B (centromeric) (SERF1B), transcript variant 2, mRNA [NM_022978]	small EDRK-rich factor 1B (centromeric)	AGAGTGCCAGAGAACCGTTGCTTTTCCGAGTTGCTCTTCTTCCAGGCTCCGTTGGTGGTC
	A_23_P250122	FAM20C	1.04267e-21	1.02359e-23	4.41658	up	3.03192	up	2.50476	up	Homo sapiens family with sequence similarity 20, member C (FAM20C), mRNA [NM_020223]	family with sequence similarity 20, member C	GACCTAATTCAAGTAAAAACCCTTTCTCCTTCCTGGGGCCTCGGCTCCTGGAGGGCTGGA
	A_24_P116909	MALT1	1.04338e-21	1.02635e-23	-2.94557	down	-2.77959	down	-2.86621	down	Homo sapiens MALT1 paracaspase (MALT1), transcript variant 1, mRNA [NM_006785]	MALT1 paracaspase	TGTGTATACATATGTTTATCTCACACACATTATGAGCTTGAATTCTTAATTCATCCTAGC
	A_23_P104471	DUSP13	1.04806e-21	1.03302e-23	13.5812	up	15.4754	up	15.2918	up	Homo sapiens dual specificity phosphatase 13 (DUSP13), transcript variant 1, mRNA [NM_001007271]	dual specificity phosphatase 13	GATTTCCCTGACCCAATTCAGAGATTCTTTATGCAAAAGTGAGTTCAGTCCATCTCTATA
	A_33_P3394471		1.08779e-21	1.07432e-23	-5.32901	down	-4.84531	down	-4.64382	down	T cell receptor alpha variable 3 (gene/pseudogene) [Source:HGNC Symbol;Acc:HGNC:12128] [ENST00000390425]		TCCAGTTCCTTCTGAAATACATCACAGGGGATAACCTGGTTAAAGGCAGCTATGGCTTTG
	A_23_P138693	NMT2	1.11566e-21	1.10405e-23	-4.66672	down	-4.00083	down	-3.63954	down	Homo sapiens N-myristoyltransferase 2 (NMT2), mRNA [NM_004808]	N-myristoyltransferase 2	TGGCAATTTGCAGTATTACCTGTACAATTGGAGGTGTCCAGGTACAGATTCTGAAAAGGT
	A_23_P503072	CCL28	1.12468e-21	1.11519e-23	-4.84525	down	-3.30483	down	-3.29324	down	Homo sapiens chemokine (C-C motif) ligand 28 (CCL28), transcript variant 1, mRNA [NM_148672]	chemokine (C-C motif) ligand 28	ACGGCCATAAAACTCCTTATTAGAGAGTCTACAGATAAATCTACAGAGACAATTCCTCAA
	A_21_P0001480	lnc-C1orf201-2	1.18167e-21	1.17403e-23	-2.44241	down	-3.3425	down	-2.99686	down	LNCipedia lincRNA (lnc-C1orf201-2), lincRNA [lnc-C1orf201-2:2]	lnc-C1orf201-2:2	AACACAATCCCAACTGATATTCACTGTAAATGATTCCATGGCTCCCTGTAGTACTTCTAC
	A_21_P0011968	XLOC_l2_008270	1.187e-21	1.18166e-23	7.89062	up	4.80228	up	4.12948	up	BROAD Institute lincRNA (XLOC_l2_008270), lincRNA [TCONS_l2_00014908]		ACTGTTTTTGTGGATGCCACAGGATTCCATGCCCAGGAAGCAAGGCTGGAAGAGCGCCTC
	A_21_P0000642	LINC00959	1.22872e-21	1.22562e-23	-1.90201	down	-2.69825	down	-2.46581	down	Homo sapiens long intergenic non-protein coding RNA 959 (LINC00959), long non-coding RNA [NR_034125]	long intergenic non-protein coding RNA 959	CATGCTTTTTCGTTGTTTTGTGGATGTACCCAGGGCTATTTACACACTCTTTCATTAAAA
	A_23_P204980	UGGT2	1.25067e-21	1.24998e-23	3.74114	up	2.28112	up	2.15464	up	Homo sapiens UDP-glucose glycoprotein glucosyltransferase 2 (UGGT2), mRNA [NM_020121]	UDP-glucose glycoprotein glucosyltransferase 2	AAGTCTGGAGCCCCTGCTGAGACGATTTGGAAGTCTCGTTAAGATCAGTGACATATTCTT
	A_32_P175739	HK2	1.32793e-21	1.32981e-23	3.27483	up	2.31017	up	2.11018	up	Homo sapiens hexokinase 2 (HK2), mRNA [NM_000189]	hexokinase 2	CAATCTTCGGGGTGTGATGAATAGCAAATCATCTCAAATCCTTGAGCACTCAGTCTAGTG
	A_33_P3386150	NRADDP	1.39069e-21	1.3954e-23	4.12948	up	5.58644	up	5.19108	up	Homo sapiens neurotrophin receptor associated death domain, pseudogene (NRADDP), non-coding RNA [NR_024046]	neurotrophin receptor associated death domain, pseudogene	ATTAAGCCTCAGCTGGTTTTGCTACTTTTGTAACCCATATTAAAGGTGATTCGGACTTTT
	A_33_P3246733	MNT	1.40105e-21	1.40856e-23	2.22336	up	2.40434	up	2.08933	up	Homo sapiens MAX network transcriptional repressor (MNT), mRNA [NM_020310]	MAX network transcriptional repressor	ATAAGGGGCCTTGCTCTGAGCACAGGTGACAGATCATAGGAAGTGGCTGGTCTGGAGTCC
	A_24_P417606		1.46544e-21	1.47619e-23	-2.07242	down	-2.19197	down	-2.41027	down	ribosomal protein L35 pseudogene 1 [Source:HGNC Symbol;Acc:HGNC:36695] [ENST00000450819]		TCGTCCACAAATCCATTGCCCATTTTCTCACAGTTATTAACCAGACTCAGAAAGAAAACC
	A_23_P119478	EBI3	1.50143e-21	1.5154e-23	1.83052	up	4.79192	up	1.77153	up	Homo sapiens Epstein-Barr virus induced 3 (EBI3), mRNA [NM_005755]	Epstein-Barr virus induced 3	TCTAGCTGAGAAATGGAGATGTACTACTCTCTCCTTTACCTTTACCTTTACCACAGTGCA
	A_23_P68072	WDR54	1.54674e-21	1.56723e-23	-2.61095	down	-2.58352	down	-2.57491	down	Homo sapiens WD repeat domain 54 (WDR54), mRNA [NM_032118]	WD repeat domain 54	AACGGACAAGTGCATCTATATGAGGCCACTACAGGAAATCTACATGTCCAGATCAATGCC
	A_21_P0000899	LOC100506990	1.54674e-21	1.5666e-23	-4.26417	down	-3.14253	down	-2.56751	down	Homo sapiens uncharacterized LOC100506990 (LOC100506990), transcript variant 1, long non-coding RNA [NR_040091]	uncharacterized LOC100506990	TTATTTAATTGTATTGGTGGTTAGAGGGTTGCGATTGATTAAGGCACATTAATGGATCCG
	A_33_P3263387	TTLL4	1.54965e-21	1.57323e-23	2.2004	up	1.81624	up	1.8772	up	Homo sapiens tubulin tyrosine ligase-like family member 4 (TTLL4), mRNA [NM_014640]	tubulin tyrosine ligase-like family member 4	TCTTGTACTGAACTGATTCTACCTCCCTCCTCTAGACTCAGTAAACAGTGACTATTCAAT
	A_23_P213385	BASP1	1.55762e-21	1.5844e-23	4.12092	up	3.81472	up	3.36613	up	Homo sapiens brain abundant, membrane attached signal protein 1 (BASP1), transcript variant 1, mRNA [NM_006317]	brain abundant, membrane attached signal protein 1	TCAATGCCAATCCTCCATTCTTCCTCTCCAGATATTTTTGGGAGTGACAAACATTCTCTC
	A_33_P3301897		1.60186e-21	1.63256e-23	-4.63737	down	-4.02969	down	-4.02076	down	T cell receptor beta variable 6-7 (non-functional) [Source:HGNC Symbol;Acc:HGNC:12232] [ENST00000390373]		ACTGACAAAGGAGAAGTCCCCGATGGCTACAATGTATCCAGATCAAACACAGAGGATTTC
	A_23_P133543	KLHL3	1.61103e-21	1.64508e-23	-3.64754	down	-4.32373	down	-3.95754	down	Homo sapiens kelch-like family member 3 (KLHL3), transcript variant 1, mRNA [NM_017415]	kelch-like family member 3	TGGCTGTTAGGGACTGTATATCTTGTAAAAGAACACTTGTCACATGCTTGATCAGTTACA
	A_32_P40375	LOC441528	1.70579e-21	1.7452e-23	-3.50224	down	-2.94494	down	-2.98638	down	Q6PJD4_HUMAN (Q6PJD4) LOC389906 protein (Fragment), partial (10%) [THC2518594]	uncharacterized LOC441528	AAGCACTGCTGCCTATGCACTCCATTTACAGGGTTATAGAGTGGAAAGTCCCACAATCTT
	A_33_P3218356	TMEM167B	1.774e-21	1.81848e-23	1.92223	up	1.67159	up	1.51872	up	Homo sapiens transmembrane protein 167B (TMEM167B), mRNA [NM_020141]	transmembrane protein 167B	GTGCATATAATGTCCGGATAAATTACACCCCTCGGTGATAAGATTACATACCTCCTTCAT
	A_33_P3314481		1.86324e-21	1.91363e-23	-4.10675	down	-4.24321	down	-3.93387	down	T cell receptor alpha variable 19 [Source:HGNC Symbol;Acc:HGNC:12115] [ENST00000390447]		AGTGGTCGGTATTCTTGGAACTTCCAGAAATCCACCAGTTCCTTCAACTTCACCATCACA
	A_33_P3237359	HMGB3	1.89388e-21	1.9511e-23	3.30504	up	5.00841	up	3.33186	up	Homo sapiens high mobility group box 3 (HMGB3), transcript variant 1, mRNA [NM_001301228]	high mobility group box 3	GTCTGGAGCACCCTGAAACTGTATCAAAGTTGCACATATTTCCAAACATTTTTTAAATGA
	A_23_P102582	C20orf24	1.89388e-21	1.95257e-23	2.95638	up	2.03449	up	2.02795	up	Homo sapiens chromosome 20 open reading frame 24 (C20orf24), transcript variant 1, mRNA [NM_018840]	chromosome 20 open reading frame 24	TAAACTATCAATGGCATTTCAAGTCTTCTGAAACAGCATGGCTGTATGTGCGTGGTCCAT
	A_24_P233786	FAM129A	1.89749e-21	1.96003e-23	3.33025	up	2.48274	up	2.59846	up	Homo sapiens family with sequence similarity 129, member A (FAM129A), mRNA [NM_052966]	family with sequence similarity 129, member A	AAATCGACACTGTGGATTGACTTTCCCGGTCACTATATAAAGCAAATAAACTTAAAACAC
	A_23_P171074	ITM2A	1.9313e-21	1.99876e-23	-6.38854	down	-4.00457	down	-3.67518	down	Homo sapiens integral membrane protein 2A (ITM2A), transcript variant 1, mRNA [NM_004867]	integral membrane protein 2A	CTAGTTGCTGTGGAGGAAATTCGTGATGTTAGTAACCTTGGCATCTTTATTTACCAACTT
	A_24_P380679	LSMEM1	2.06644e-21	2.1427e-23	5.16604	up	4.92701	up	6.09328	up	Homo sapiens leucine-rich single-pass membrane protein 1 (LSMEM1), transcript variant 1, mRNA [NM_182597]	leucine-rich single-pass membrane protein 1	GAACCTGCATTAGTTCCAGCAATGAAAGTAAGACACACAGCATATGACATAAGACACAGT
	A_21_P0008482	LINC01550	2.0694e-21	2.14985e-23	-5.64795	down	-5.20707	down	-4.21307	down	Homo sapiens long intergenic non-protein coding RNA 1550 (LINC01550), long non-coding RNA [NR_015430]	long intergenic non-protein coding RNA 1550	TTGATGCCATGCAACTGAGAAGTGGTTCAAGCTGGATTTGAACAAATGTAGTCAGACTCT
	A_33_P3281905	LINC00930	2.11086e-21	2.19948e-23	2.83528	up	1.99376	up	2.13464	up	Homo sapiens long intergenic non-protein coding RNA 930 (LINC00930), long non-coding RNA [NR_021493]	long intergenic non-protein coding RNA 930	CTATGCTTCCTGCACAGCCTGCCATACCATGAGCCAATAAACCTGTTTTCTTTGTAAATT
	A_23_P47116	RASSF7	2.11086e-21	2.20124e-23	-2.32533	down	-2.52833	down	-2.35962	down	Homo sapiens Ras association (RalGDS/AF-6) domain family (N-terminal) member 7 (RASSF7), transcript variant 1, mRNA [NM_003475]	Ras association (RalGDS/AF-6) domain family (N-terminal) member 7	AGCTGAACCGAGAGCTCCGTCAGTGCAACCTGCAGCAGTTCATCCAGCAGACCGGGGCTG
	A_23_P129486	MSRB1	2.11369e-21	2.20836e-23	2.92194	up	2.06509	up	2.29146	up	Homo sapiens methionine sulfoxide reductase B1 (MSRB1), mRNA [NM_016332]	methionine sulfoxide reductase B1	TTGGCCTCTCGTCCACGAGGGGAGAAACCTAAACCCTGTTTCACAATCTGTGCGGAAGTA
	A_21_P0000607	ST3GAL4-AS1	2.14423e-21	2.24449e-23	5.78722	up	4.44289	up	4.34407	up	Homo sapiens ST3GAL4 antisense RNA 1 (head to head) (ST3GAL4-AS1), long non-coding RNA [NR_033839]	ST3GAL4 antisense RNA 1 (head to head)	GTGGCCAAGAAATGTATTCTCTCACTTTGGACTTAGGAGTCCAAAGAGAAGCCCAGAAAC
	A_33_P3222233	CC2D2B	2.14874e-21	2.25345e-23	5.167	up	5.10393	up	4.98285	up	Homo sapiens coiled-coil and C2 domain containing 2B (CC2D2B), transcript variant 1, mRNA [NM_001159747]	coiled-coil and C2 domain containing 2B	GTTTCTCAAATTGTAGAATTCACACCACCTCCATTTGAATCATCTGGAGAGCCTTGTTGA
	A_21_P0014428	LOC101927372	2.18344e-21	2.29415e-23	-2.71386	down	-2.77915	down	-2.73019	down	PREDICTED: Homo sapiens uncharacterized LOC101927372 (LOC101927372), ncRNA [XR_244439]	uncharacterized LOC101927372	ACGAGAGCCCATGACCTCCGAAATCCATGGCAACGTAATAAAAGTCTGAAACAGAGAGAA
	A_33_P3407925	VMP1	2.22898e-21	2.34638e-23	2.80456	up	2.03084	up	2.29289	up	Homo sapiens vacuole membrane protein 1 (VMP1), mRNA [NM_030938]	vacuole membrane protein 1	GGTGTCTTACAAGTGAGCTGACACCATTTTTTATTCTGTGTATTTAGAATGAAGTCTTGA
	A_33_P3346891	MYBL1	2.23978e-21	2.36217e-23	-5.12665	down	-4.71233	down	-4.24323	down	Homo sapiens v-myb avian myeloblastosis viral oncogene homolog-like 1 (MYBL1), transcript variant 3, mRNA [NM_001294282]	v-myb avian myeloblastosis viral oncogene homolog-like 1	CGATCATGATTATGAAGTACCACAACAAAAAGGACTGAAGAAACTCTGGAACAGAGTAAA
	A_23_P411296	CEBPB	2.28799e-21	2.41753e-23	5.13508	up	2.98142	up	2.63937	up	Homo sapiens CCAAT/enhancer binding protein (C/EBP), beta (CEBPB), transcript variant 1, mRNA [NM_005194]	CCAAT/enhancer binding protein (C/EBP), beta	CACGTGTAACTGTCAGCCGGGCCCTGAGTAATCGCTTAAAGATGTTCCTACGGGCTTGTT
	A_33_P3240763		2.29679e-21	2.43135e-23	7.6942	up	10.8042	up	12.1652	up	Homo sapiens cDNA clone IMAGE:5302821. [BC040838]		TTTACTCTGTGAACTCGCTCCAAATTCTTTCTCGCATGAGATCAAAGAGACCTCTCTCGG
	A_21_P0011945		2.2979e-21	2.43705e-23	-2.42557	down	-2.50619	down	-2.64406	down			ATCAAGTTCAATGCGGATGAATTTGAAGACATGGTGGCTGAGAAGCAGCTCATCCCAGAT
	A_23_P161909	MS4A3	2.36206e-21	2.51442e-23	3.34692	up	6.83823	up	6.12575	up	Homo sapiens membrane-spanning 4-domains, subfamily A, member 3 (hematopoietic cell-specific) (MS4A3), transcript variant 1, mRNA [NM_006138]	membrane-spanning 4-domains, subfamily A, member 3 (hematopoietic cell-specific)	TAATATCCAGTCATTAAGGAGTTGTCACTCTTCATCAGAGTCACCGGACCTATGCAATTA
	A_24_P89701	IMPDH1	2.36206e-21	2.51097e-23	2.61166	up	2.28954	up	2.37365	up	Homo sapiens IMP (inosine 5'-monophosphate) dehydrogenase 1 (IMPDH1), transcript variant 1, mRNA [NM_000883]	IMP (inosine 5'-monophosphate) dehydrogenase 1	AGCTGCAGTCGAAGGCTTTAACTTTGCACACTTGGGATCACAGTTGCGTCATTGTGTATT
	A_33_P3424010		2.45566e-21	2.61889e-23	-4.0085	down	-4.17904	down	-3.8914	down	T cell receptor beta constant 1 [Source:HGNC Symbol;Acc:HGNC:12156] [ENST00000613720]		ACTTATTTCCAGAATGAAGCTCAACTAGACAAATCGGGGCTGCCCAGTGATCGCTTCTTT
	A_33_P3358392	BCL11B	2.60067e-21	2.77867e-23	-8.75763	down	-5.9143	down	-5.14986	down	Homo sapiens B-cell CLL/lymphoma 11B (zinc finger protein) (BCL11B), transcript variant 1, mRNA [NM_138576]	B-cell CLL/lymphoma 11B (zinc finger protein)	CTCCAACCTAACCTGTGTCTGCGAAGTCCTATGGAAACCCGAGGGTTGATTAAGGCAGTA
	A_33_P3313338		2.6256e-21	2.81048e-23	-4.30597	down	-4.55077	down	-4.25467	down	T cell receptor alpha variable 17 [Source:HGNC Symbol;Acc:HGNC:12113] [ENST00000390445]		AGATTAAGAGTCACGCTTGACACTTCCAAGAAAAGCAGTTCCTTGTTGATCACGGCTTCC
	A_33_P3256031		2.65165e-21	2.84359e-23	-7.1115	down	-5.65276	down	-4.97481	down	T cell receptor beta variable 4-1 [Source:HGNC Symbol;Acc:HGNC:12215] [ENST00000390357]		AAGCAGAAAGCTAAGAAGCCACCGGAGCTCATGTTTGTCTACAGCTATGAGAAACTCTCT
	A_24_P32520	RNF214	2.71465e-21	2.9165e-23	-3.12568	down	-2.38067	down	-2.63196	down	Homo sapiens ring finger protein 214 (RNF214), transcript variant 1, mRNA [NM_001077239]	ring finger protein 214	GTCTGTATTCCAATGTTCGTAAATGAAACTATGTATATTATGCAGAAACAGTCTGTTCCC
	A_23_P302470	SULT1B1	2.86388e-21	3.08248e-23	4.28761	up	5.08805	up	4.53464	up	Homo sapiens sulfotransferase family, cytosolic, 1B, member 1 (SULT1B1), mRNA [NM_014465]	sulfotransferase family, cytosolic, 1B, member 1	TGTCTAAGTCACAAATCTGAAGAAATAAGAGATTGTCTGTAGTTGATTGAAACGAGGGCA
	A_21_P0005521	KMT2E-AS1	2.8769e-21	3.10216e-23	3.7856	up	2.9284	up	3.2847	up	Homo sapiens KMT2E antisense RNA 1 (head to head) (KMT2E-AS1), long non-coding RNA [NR_024586]	KMT2E antisense RNA 1 (head to head)	TTCCTTTATATGGCGGTGATTAAACGAGGGAGGGACAGACAGTGATCTCGAAGAAAAAAG
	A_32_P154053	ATG9B	3.0334e-21	3.27689e-23	-4.47112	down	-4.1768	down	-4.39907	down	Homo sapiens autophagy related 9B (ATG9B), transcript variant 1, mRNA [NM_173681]	autophagy related 9B	GGGCAGTTCTTCTTTGAGTCTTAGCCCTAATCCCTTTGAAAATTCTATTTTCCTTTGTCC
	A_33_P3362068		3.06537e-21	3.31747e-23	4.16744	up	3.14274	up	3.21059	up	ICP0_HHV11 (P08393) Trans-acting transcriptional protein ICP0 (Immediate-early protein IE110) (VMW110) (Alpha-0 protein), partial (4%) [THC2688744]		ATGAATGCTAATTTTCTTAATCGGCCTCCGTCTCTTCCTCCTCCGCGAGTCGTCGGCCTG
	A_23_P413641	PREX1	3.0764e-21	3.33547e-23	2.47543	up	1.8698	up	2.27351	up	Homo sapiens phosphatidylinositol-3,4,5-trisphosphate-dependent Rac exchange factor 1 (PREX1), mRNA [NM_020820]	phosphatidylinositol-3,4,5-trisphosphate-dependent Rac exchange factor 1	CAAAGAAAGGTATGTTGTCTAACAGGGGACCAACAGAAGGTAGTATTGACAACTGTTCCC
	A_24_P268729	HEMK1	3.28536e-21	3.56851e-23	-3.96344	down	-2.85026	down	-2.65929	down	Homo sapiens HemK methyltransferase family member 1 (HEMK1), mRNA [NM_016173]	HemK methyltransferase family member 1	TCTGGCATACCCAAGTTCAGTAAATGTCTATCAGTAAGCTGATGGTACATGCATTTTCTA
	A_33_P3216938	CAND1.11	3.40835e-21	3.71306e-23	5.42701	up	5.11404	up	5.33541	up	Homo sapiens uncharacterized LOC100130460 (CAND1.11), long non-coding RNA [NR_103765]	uncharacterized LOC100130460	TTGTCCCTTCCAAAAAGCTTCCCTGGCCTTAATGTCAGTGCTTGTAGGTGATCTCAGAAA
	A_23_P10385	DTL	3.40835e-21	3.71554e-23	-1.26284	down	2.57124	up	2.19812	up	Homo sapiens denticleless E3 ubiquitin protein ligase homolog (Drosophila) (DTL), transcript variant 1, mRNA [NM_016448]	denticleless E3 ubiquitin protein ligase homolog (Drosophila)	GGAAGATGTTATTTATGACCAATATCTGCCAGTAACGCTGTTTATCTCACTTGCTTTGAA
	A_23_P2181	CYB5R2	3.44729e-21	3.76636e-23	5.36171	up	6.53191	up	3.46374	up	Homo sapiens cytochrome b5 reductase 2 (CYB5R2), transcript variant 2, mRNA [NM_016229]	cytochrome b5 reductase 2	CTTGCTTGGAGGCTGGCAAGAGCTCCATTTCAGTATCTTTCTCCGTGGTTTTGTGAAATA
	A_33_P3356752	GPER1	3.44729e-21	3.77158e-23	4.94265	up	4.27381	up	3.54018	up	Homo sapiens G protein-coupled estrogen receptor 1 (GPER1), transcript variant 3, mRNA [NM_001039966]	G protein-coupled estrogen receptor 1	AGAAAACAAATTTGCCGGCCCTGAACCGCTTCTGTCACGCTGCCCTGAAGGCCGTCATTC
	A_33_P3290612		3.51013e-21	3.85069e-23	6.40927	up	13.5124	up	11.1829	up	Q921B4_MOUSE (Q921B4) Neurotrophin receptor interacting factor 2, partial (4%) [THC2675356]		TTTTAGCCCTTTCTGAGCACAAAAGCACCAAAGACTGGAAGATGGCACCTAAGCTCATCT
	A_23_P25566	GPR183	3.51013e-21	3.85416e-23	-3.19782	down	-3.61605	down	-3.5656	down	Homo sapiens G protein-coupled receptor 183 (GPR183), mRNA [NM_004951]	G protein-coupled receptor 183	CTGAAACGGCAAGTCAGTGTATCGATTTCTAGTGCTGTGAAGTCAGCCCCTGAAGAAAAT
	A_23_P120860	NIPSNAP1	3.51749e-21	3.86918e-23	-2.41675	down	-2.70983	down	-2.43381	down	Homo sapiens nipsnap homolog 1 (C. elegans) (NIPSNAP1), transcript variant 1, mRNA [NM_003634]	nipsnap homolog 1 (C. elegans)	GGAAGGTAGAACTTAGAATTCAGAACTTGGGTTTCAATTGTAGAATTTGGAATCTGGAAT
	A_24_P296698	MAP2K3	3.52711e-21	3.88671e-23	4.62107	up	3.1707	up	3.0304	up	Homo sapiens mitogen-activated protein kinase kinase 3 (MAP2K3), transcript variant B, mRNA [NM_145109]	mitogen-activated protein kinase kinase 3	ACTGCCCATCCCGGGTCCTTTCCCTGATGGGTTGGGGCAGTTACCTGGTTGCTGTTTTAA
	A_33_P3234530	TNFRSF25	3.60793e-21	3.98289e-23	-4.32966	down	-4.39651	down	-4.11064	down	Homo sapiens tumor necrosis factor receptor superfamily, member 25 (TNFRSF25), transcript variant 12, mRNA [NM_001039664]	tumor necrosis factor receptor superfamily, member 25	AATCTGGATCCGCCTTAGCCAGATACATAAGGGTATTTGCCTTCACTTTCAGCCAGCATT
	A_24_P27977	TRPM2	3.71513e-21	4.10856e-23	4.95441	up	4.66715	up	4.07974	up	Homo sapiens transient receptor potential cation channel, subfamily M, member 2 (TRPM2), transcript variant 1, mRNA [NM_003307]	transient receptor potential cation channel, subfamily M, member 2	GCACTGTCTGAACTCCTGACTGTCAGGATAAACTCCGTGGGGGTACAGGAGCCCAGACAA
	A_23_P202104	PPIF	3.81563e-21	4.22722e-23	2.86326	up	1.71562	up	1.78231	up	Homo sapiens peptidylprolyl isomerase F (PPIF), mRNA [NM_005729]	peptidylprolyl isomerase F	TCCTGTGCTCCGGAGGGAAGCATTTCCTGGTAGGCTTTGATTTTTCTGTGTGTTAAAGAA
	A_33_P3302916	BACH2	3.85115e-21	4.27416e-23	-8.33067	down	-5.44209	down	-5.96479	down	Homo sapiens BTB and CNC homology 1, basic leucine zipper transcription factor 2 (BACH2), transcript variant 1, mRNA [NM_021813]	BTB and CNC homology 1, basic leucine zipper transcription factor 2	GCACTGAGTTTTGGGTCAAACCTATTTTCTTAAATGAAGTTGTAACTTCGGTATAACTCA
	A_23_P114903	HSPA6	4.0495e-21	4.50228e-23	6.07719	up	4.57187	up	4.85809	up	Homo sapiens heat shock 70kDa protein 6 (HSP70B') (HSPA6), mRNA [NM_002155]	heat shock 70kDa protein 6 (HSP70B')	CAAAATGCAAGACAAGTGTCGGGAAGTCCTTGCCTGGCTGGAGCACAACCAGCTGGCAGA
	A_33_P3233030		4.06545e-21	4.52803e-23	-2.31981	down	-2.46232	down	-2.56749	down			ATGATAAGATAAAGAAAGACGCCGAAGAGAAAGGTACCTGGGTTCAATTGAAGCGCCAGC
	A_23_P345460	PLEKHG4	4.06579e-21	4.53642e-23	-5.51384	down	-5.51021	down	-5.03361	down	Homo sapiens pleckstrin homology domain containing, family G (with RhoGef domain) member 4 (PLEKHG4), transcript variant 3, mRNA [NM_001129728]	pleckstrin homology domain containing, family G (with RhoGef domain) member 4	GACTTGATGCCTTTTGAATAACTTTCAATAGAATTGTCTAAAATTATCTTACTGGTTGTT
	A_23_P155257	FOXP1	4.11572e-21	4.60025e-23	-2.25306	down	-2.00399	down	-1.93438	down	Homo sapiens forkhead box P1 (FOXP1), transcript variant 1, mRNA [NM_032682]	forkhead box P1	CAACCACAGTCCAGATTTTGACCATGACAGAGATTACGAAGATGAACCAGTAAACGAGGA
	A_23_P19543	SRPK1	4.18194e-21	4.68251e-23	4.98176	up	3.73142	up	3.70306	up	Homo sapiens SRSF protein kinase 1 (SRPK1), transcript variant 1, mRNA [NM_003137]	SRSF protein kinase 1	CTGTCAAATTGCCACGATCTCACTAAAGGATTTCTATTTGCTGTCAGTTAAAAATAAAGC
	A_33_P3346333		4.33125e-21	4.85823e-23	4.46235	up	3.35288	up	3.66196	up			AGGTTGTCTTCTAGAATCAGAGCCATAGCCTTACTTGTGGCCTTGGATCTAGGTCTGTTT
	A_33_P3321085		4.40939e-21	4.95456e-23	-3.93573	down	-3.87691	down	-3.61909	down	T cell receptor alpha variable 2 [Source:HGNC Symbol;Acc:HGNC:12116] [ENST00000390424]		TTAAAGGCTCAAAGCCTTCTCAGCAGGGACGATACAACATGACCTATGAACGGTTCTCTT
	A_33_P3228564	DOK3	4.42278e-21	4.99103e-23	3.59366	up	2.86221	up	2.83782	up	Homo sapiens docking protein 3 (DOK3), transcript variant 2, mRNA [NM_001144875]	docking protein 3	ATTCCAGGGGGAGAGAAGTTTCCTGAAGACTTCCATGCTGCGTTCCCTCCTCTGCTCCTG
	A_23_P169576	EXOC6	4.42278e-21	4.99577e-23	2.88802	up	2.52047	up	2.33215	up	Homo sapiens exocyst complex component 6 (EXOC6), transcript variant 1, mRNA [NM_019053]	exocyst complex component 6	ATGCTGAATCTTCCCTTTGCCTTTTCAGGATTTAGGCCTGTAAGAAACTATGCCTGATTC
	A_24_P68079	TRANK1	4.42278e-21	4.98438e-23	-3.54568	down	-3.40692	down	-2.6337	down	Homo sapiens tetratricopeptide repeat and ankyrin repeat containing 1 (TRANK1), mRNA [NM_014831]	tetratricopeptide repeat and ankyrin repeat containing 1	AATTGTTTCCTTGAAATGCTTGTTTCCAATTTTTCTTAGATTATGTTTCTAATTTTTATT
	A_32_P150891	DIAPH3	4.60195e-21	5.21629e-23	1.34096	up	4.81115	up	3.80695	up	Homo sapiens diaphanous-related formin 3 (DIAPH3), transcript variant 1, mRNA [NM_001042517]	diaphanous-related formin 3	TAGAGATGATGGAGAACTTTCCAAAGCCACTGTCAGAGAATGAACTCTTAGAACTTTTTG
	A_32_P53558		4.60195e-21	5.20995e-23	-3.29611	down	-2.9389	down	-3.08472	down			GTTGTCCTTTGAAATGATTGACCAGGAAAAAGATCATCCTTAAATTTTGAAGCAAGTGAG
	A_23_P63897	CTBP2	4.62353e-21	5.24986e-23	2.66366	up	2.26671	up	2.2458	up	Homo sapiens C-terminal binding protein 2 (CTBP2), transcript variant 2, mRNA [NM_022802]	C-terminal binding protein 2	ATCTGAACTGCATACTGAGCGGGCAAGTCGGTTGTAAGTTCAGTAAAACCCTCTGATGAT
	A_24_P404245	PCYT2	4.64793e-21	5.28673e-23	-2.30719	down	-2.11453	down	-2.1101	down	Homo sapiens phosphate cytidylyltransferase 2, ethanolamine (PCYT2), transcript variant 2, mRNA [NM_002861]	phosphate cytidylyltransferase 2, ethanolamine	AACCTCACCACAGACCTCATCGTCCAGCGGATCATCACCAACAGGTTGGAGTATGAGGCG
	A_23_P334709	FKBP9	4.89094e-21	5.57279e-23	3.25049	up	3.4334	up	3.44286	up	Homo sapiens FK506 binding protein 9, 63 kDa (FKBP9), transcript variant 1, mRNA [NM_007270]	FK506 binding protein 9, 63 kDa	TACTGATGTAGCCCTGAGGTAGTTCATGAAAATGCTGTGCACTCATTCCATGGAATAAAT
	A_33_P3351249	CXCL16	5.28664e-21	6.03407e-23	3.5316	up	2.30874	up	2.00003	up	Homo sapiens chemokine (C-X-C motif) ligand 16 (CXCL16), transcript variant 2, mRNA [NM_001100812]	chemokine (C-X-C motif) ligand 16	CTTATTCTTACAAAAAGTGTAATAAAGGAGACTGACCCCTGACAACATGGTAGGCACTGT
	A_24_P229164	HIP1R	5.29689e-21	6.05621e-23	-4.40565	down	-3.10267	down	-3.22389	down	Homo sapiens huntingtin interacting protein 1 related (HIP1R), transcript variant 1, mRNA [NM_003959]	huntingtin interacting protein 1 related	CCTGAGCCTCAACTCTTCAGAAAATAGTGTTTTTAATATTCCTCTTCAGAAAATAGTGTT
	A_23_P137035	PIR	5.32994e-21	6.10451e-23	3.53466	up	6.20827	up	4.68333	up	Homo sapiens pirin (iron-binding nuclear protein) (PIR), transcript variant 1, mRNA [NM_003662]	pirin (iron-binding nuclear protein)	GGAAGAGCAGGTCTTGATGTGTCCTAGAATTTTGCCATTTCTGAGATTGAGCCATTGAAG
	A_21_P0009009		5.35535e-21	6.14417e-23	5.09401	up	2.84392	up	4.23551	up	ens		AGAAGAGATGAGCTCCTCACTGCAGCTGACCTGCGATTCTCAGGCCACCTTGGTCCTTGA
	A_23_P376557	MMP25	5.36829e-21	6.1696e-23	10.3026	up	6.7407	up	7.54191	up	Homo sapiens matrix metallopeptidase 25 (MMP25), mRNA [NM_022468]	matrix metallopeptidase 25	ATGGGTAGAGTCACTTAGGGGCCACTTCCTAAGTTGCTGTCCAGCCTCAGTGACCCCCTA
	A_33_P3404418	MAP3K6	5.50524e-21	6.33784e-23	2.81442	up	1.78222	up	1.88039	up	Homo sapiens mitogen-activated protein kinase kinase kinase 6 (MAP3K6), transcript variant 1, mRNA [NM_004672]	mitogen-activated protein kinase kinase kinase 6	GAAGAGCTGCTGCGCTGCCTCGGGGCACACATCCACACTCCCAACCGCCGGCAGCTCGCC
	A_23_P258493	LMNB1	5.61325e-21	6.47326e-23	4.1433	up	3.06966	up	2.9912	up	Homo sapiens lamin B1 (LMNB1), transcript variant 1, mRNA [NM_005573]	lamin B1	AATATTAACCTAATCACCATGTAAGCACTCTGGATGATGGATTCCACAAAACTTGGTTTT
	A_23_P133956	KIFC1	5.77103e-21	6.66658e-23	1.43337	up	4.53423	up	3.09761	up	Homo sapiens kinesin family member C1 (KIFC1), mRNA [NM_002263]	kinesin family member C1	TGGTAGTGCTAAGATGCTCATGTTTGTGAACATTTCTCCACTGGAAGAGAACGTCTCCGA
	A_21_P0001198		5.86462e-21	6.78625e-23	4.19786	up	3.64936	up	4.12233	up			CCTGGCTGTTCTGTTCATGACGGTGGTTATTCCAATTACTTTGAGAATTATATTTATTAG
	A_33_P3243812	WASF1	6.17053e-21	7.1524e-23	2.99901	up	3.56687	up	3.53894	up	Homo sapiens WAS protein family, member 1 (WASF1), transcript variant 1, mRNA [NM_003931]	WAS protein family, member 1	ACAGGAGACGTACGATGTTTGTGAACAGCCTCCACCTCTCAATATACTCACTCCTTATAG
	A_33_P3413224	lnc-GCNT3-1	6.2039e-21	7.20987e-23	3.183	up	3.08259	up	2.95096	up	BJ995728 human hepatoblastoma cDNA Homo sapiens cDNA clone hmft-3130 5', mRNA sequence [BJ995728]	lnc-GCNT3-1:1	GCTGACCCGGACACAGTGAGAAGCCCCGGCGGAAGTGATAACATCCCGACCTCCTCCGGG
	A_33_P3213596	TNIK	6.2039e-21	7.22777e-23	-4.01935	down	-2.35795	down	-2.27182	down	Homo sapiens TRAF2 and NCK interacting kinase (TNIK), transcript variant 1, mRNA [NM_015028]	TRAF2 and NCK interacting kinase	GGAGGAAGTAGCCAAGTGTTTTTCATGACCCTCAACAGAAATTCCATGATGAACTGGTAA
	A_19_P00321264	UBA6-AS1	6.2039e-21	7.21803e-23	-4.03724	down	-2.81273	down	-2.97298	down	Homo sapiens UBA6 antisense RNA 1 (head to head) (UBA6-AS1), long non-coding RNA [NR_015439]	UBA6 antisense RNA 1 (head to head)	TCTCATCAGCACATGATTGGTGCAGGGTTCTGAGGATGATTTTGAGATGTTCCCTGATGT
	A_23_P120153	RNF149	6.33725e-21	7.39563e-23	4.15265	up	2.46683	up	2.38516	up	Homo sapiens ring finger protein 149 (RNF149), mRNA [NM_173647]	ring finger protein 149	AGATGACTTTAGGATTTGCATTTTTCCCTTTATTGCCTCATTTCTTGTGACGCCTTGTTG
	A_19_P00320729	CDYL2	6.53156e-21	7.63526e-23	2.73999	up	2.72273	up	2.09709	up	chromodomain protein, Y-like 2 [Source:HGNC Symbol;Acc:HGNC:23030] [ENST00000570137]	chromodomain protein, Y-like 2	CTAGAGCAAATTGTACACTCTCTTTGTGAATGGTCCTGTAACGTGTATGAACACATTTCT
	A_23_P6561	EBLN2	6.66319e-21	7.80227e-23	4.63679	up	3.57267	up	3.50224	up	Homo sapiens endogenous Bornavirus-like nucleoprotein 2 (EBLN2), mRNA [NM_018029]	endogenous Bornavirus-like nucleoprotein 2	ATCTTGAGGGGGGAGTGTTGGGTGGAATCATAGATCCATGCACTCCTAACATGAACTAAT
	A_33_P3251470		6.8002e-21	7.97611e-23	4.44412	up	3.64995	up	3.3592	up			CTGATTTTGGCCTTCCAGCCCCCAGAACTGGAGGAAAATAAATTTCTGTTGCTTAAGTCA
	A_24_P273203		6.84604e-21	8.04337e-23	-2.09468	down	-2.10122	down	-2.10907	down	UI-E-EJ0-ahl-n-19-0-UI.r1 UI-E-EJ0 Homo sapiens cDNA clone UI-E-EJ0-ahl-n-19-0-UI 5', mRNA sequence [BM701600]		AAGGCCAATAAGGCAGTGTTGAAAGGTGTCCACAGCCACATGCAAAAAGAAGATCCACAT
	A_23_P502350	RFX2	6.86293e-21	8.07674e-23	5.19946	up	3.86031	up	4.16951	up	Homo sapiens regulatory factor X, 2 (influences HLA class II expression) (RFX2), transcript variant 1, mRNA [NM_000635]	regulatory factor X, 2 (influences HLA class II expression)	AAGCTCACAGTTAACGGATTGTAATGCCCGGCTTTTCCTCACTCCTGGTAACCAATACAA
	A_23_P96590	GPRASP1	7.09798e-21	8.36736e-23	-3.50947	down	-4.58826	down	-4.35144	down	Homo sapiens G protein-coupled receptor associated sorting protein 1 (GPRASP1), transcript variant 1, mRNA [NM_014710]	G protein-coupled receptor associated sorting protein 1	GAGCTGAAAACACATTTGTTGATATTTGTCTTGTCCACATTGTGATGTTCAGTATTTGAG
	A_33_P3281930	LRRFIP2	7.1498e-21	8.44254e-23	2.92562	up	2.3582	up	2.14132	up	Homo sapiens leucine rich repeat (in FLII) interacting protein 2 (LRRFIP2), transcript variant 1, mRNA [NM_006309]	leucine rich repeat (in FLII) interacting protein 2	GACACAAACCCCTTTTAGTACTGTTTTGAGTTTTGTCATTAAAACAGCCACCTTTGTATT
	A_33_P3209591	AQP3	7.18837e-21	8.50226e-23	-6.72508	down	-4.80706	down	-4.68942	down	Homo sapiens aquaporin 3 (Gill blood group) (AQP3), mRNA [NM_004925]	aquaporin 3 (Gill blood group)	ACTTCGCCGACAACCAGCTTTTTGTTTCGGGCCCCAATGGCACAGCCGGCATCTTTGCTA
	A_24_P400473	SLC25A44	7.2249e-21	8.5597e-23	3.16485	up	2.44668	up	2.53121	up	Homo sapiens solute carrier family 25, member 44 (SLC25A44), transcript variant 2, mRNA [NM_014655]	solute carrier family 25, member 44	ATGGGACGGTGGACTTCCATTCTCCCTAAACTGGAGTTTTGGTCGGTAATCAAAACTAAA
	A_33_P3300843		7.31566e-21	8.68165e-23	9.65611	up	5.35219	up	5.54774	up			CTCACGCTGAGGGAGGTCAGCTTGAGCCCCTGCCTCACACTGGCCTCTCTCACGCTGAGG
	A_33_P3300092	NDST1	7.32712e-21	8.70969e-23	2.9741	up	2.41714	up	2.48016	up	Homo sapiens N-deacetylase/N-sulfotransferase (heparan glucosaminyl) 1 (NDST1), transcript variant 1, mRNA [NM_001543]	N-deacetylase/N-sulfotransferase (heparan glucosaminyl) 1	CCTTCCTCCATTAATGTACAATCTCGAACTAACTGCTAATAAAGTGGGGTTCTGTTTGTA
	A_23_P354798	COQ10A	7.50864e-21	8.94027e-23	-3.17881	down	-3.0139	down	-2.98791	down	Homo sapiens coenzyme Q10 homolog A (S. cerevisiae) (COQ10A), transcript variant 1, mRNA [NM_144576]	coenzyme Q10 homolog A (S. cerevisiae)	AGGGGACGATAGTAACTTTTCTAAGGATTGAATAAATTGAGCTTTTCTTCTGGCACAGAG
	A_23_P137470	SIPA1L2	7.62092e-21	9.09508e-23	4.89144	up	5.04882	up	5.3566	up	Homo sapiens signal-induced proliferation-associated 1 like 2 (SIPA1L2), mRNA [NM_020808]	signal-induced proliferation-associated 1 like 2	GGGCTTACCTCAAGAGGGAAGATAGTTGAGTTTTATTTCCTGTATATCAGGTGACCTGGT
	A_33_P3409553		7.62092e-21	9.104e-23	-2.65114	down	-2.53388	down	-2.71519	down			TATCACTTTTGATGAGATCGTCAACATTGCTTGACACACGTGGCACCGATCTTTAGCCAG
	A_23_P25935	C14orf1	7.80559e-21	9.34e-23	-2.37164	down	-2.37632	down	-2.53591	down	Homo sapiens chromosome 14 open reading frame 1 (C14orf1), mRNA [NM_007176]	chromosome 14 open reading frame 1	AACTGAGGCCAGCATTATCACCTCCAGGACTTTCTCGTTTTCCACCTTGGCCATCTTCTT
	A_33_P3337500		7.94178e-21	9.51861e-23	-3.00578	down	-2.87799	down	-2.75641	down	T cell receptor alpha variable 22 [Source:HGNC Symbol;Acc:HGNC:12119] [ENST00000390450]		TTATTGTACATTTCCTCTTCCCAGACCACAGACTCAGGCGTTTATTTCTGTGCTGTGGAG
	A_24_P350008		8.01164e-21	9.61813e-23	-4.40238	down	-4.02228	down	-3.85397	down			AGGGCATCATCATTTCTGGCCATTTCTACAGATACAAGTTGAAGTACCTGGTCTTCCTCC
	A_32_P526255	PNPLA1	8.26928e-21	9.94374e-23	2.52424	up	4.60459	up	4.11122	up	Homo sapiens patatin-like phospholipase domain containing 1 (PNPLA1), transcript variant 3, mRNA [NM_001145717]	patatin-like phospholipase domain containing 1	GCTGAAGACTCAAACTGGGTGAATAAGGTCTTCAAGAAGAACAAGCAAAAGACAAGTGGC
	A_33_P3283616	SH2D1A	8.45912e-21	1.01887e-22	-5.35594	down	-4.92412	down	-4.62878	down	Homo sapiens SH2 domain containing 1A (SH2D1A), transcript variant 1, mRNA [NM_002351]	SH2 domain containing 1A	TTAAATATATGCTAAGTCTTATATATTGTAGATAATACAGTTCGGTGAGCTACAAATGCA
	A_19_P00811717	CDHR3	8.55216e-21	1.03176e-22	-5.01214	down	-4.29311	down	-4.0162	down	cadherin-related family member 3 [Source:HGNC Symbol;Acc:HGNC:26308] [ENST00000488386]	cadherin-related family member 3	ATTCTGCAGTTGTTGCTCTAGGAGCTGAAACCAGTGGGTAGATGTCGTTCTGAAACGCAG
	A_32_P33083	VCX2	8.69693e-21	1.05094e-22	12.1645	up	18.0288	up	13.7206	up	Homo sapiens variable charge, X-linked 2 (VCX2), mRNA [NM_016378]	variable charge, X-linked 2	AAGAACCACTGAGTCAGGAGAGCGAGGTGGAAGAACCACTGACTGTGTGGATGGCCAGCT
	A_21_P0010873	ANTXRLP1	8.72309e-21	1.05582e-22	-5.22644	down	-4.45889	down	-3.9309	down	Homo sapiens anthrax toxin receptor-like pseudogene 1 (ANTXRLP1), transcript variant 2, non-coding RNA [NR_103828]	anthrax toxin receptor-like pseudogene 1	AGAAGGAGTACTTCATTGAAGTCAGCTTGAACAACGGCAAAACATTCAAGAGCAATGTCA
	A_21_P0012336	GGTLC1	8.83406e-21	1.0721e-22	3.80976	up	3.47632	up	2.74128	up	Homo sapiens gamma-glutamyltransferase light chain 1 (GGTLC1), transcript variant A, mRNA [NM_178311]	gamma-glutamyltransferase light chain 1	ACTTTGGGGGACGGGCTTCCCCTGTGAGCAGCAGAGCAGCATAATAAATGAGGCCACTGT
	A_33_P3306024	SIGLEC16	8.83406e-21	1.07274e-22	2.2654	up	1.98916	up	1.99896	up	Homo sapiens sialic acid binding Ig-like lectin 16 (gene/pseudogene) (SIGLEC16), non-coding RNA [NR_002825]	sialic acid binding Ig-like lectin 16 (gene/pseudogene)	GAGGCTGTGTCACGGCCTGTGTCCTCAACCTTGGCAAAATAAACTTTCTAAATTAACTGG
	A_33_P3417305		9.0349e-21	1.09926e-22	4.72258	up	4.06128	up	3.70096	up	ATP synthase, H+ transporting, mitochondrial Fo complex, subunit F2 pseudogene 3 [Source:HGNC Symbol;Acc:HGNC:21286] [ENST00000451550]		TTCCGATACTGCCTTTCCTACAAGGAGCTCAAGCACAAGCGGCTATGCAGGTACCACTGA
	A_33_P3336148		9.0349e-21	1.10069e-22	3.72219	up	2.98911	up	4.21711	up			TCCAGGACATGTGCGCAAGAGCGGCAACAGGTGGCTGTGTAGTAGGGGTAGACGCAGAGC
	A_23_P2431	C3AR1	9.0949e-21	1.10979e-22	2.84635	up	3.45207	up	2.95865	up	Homo sapiens complement component 3a receptor 1 (C3AR1), mRNA [NM_004054]	complement component 3a receptor 1	AGTGAGGAGCTCACACGTTCCACCCACTGTCCCTCAAACAATGTCATTTCAGAAAGAAAT
	A_23_P387031	COL23A1	9.18272e-21	1.12232e-22	6.36664	up	5.52671	up	4.12801	up	Homo sapiens collagen, type XXIII, alpha 1 (COL23A1), mRNA [NM_173465]	collagen, type XXIII, alpha 1	CAAGTCTCCCACCCAGAACTCTGGCCAAAAATGGCTCTCTAGGTGGGCTGTGCAGGCAAA
	A_23_P96165	C11orf80	9.47901e-21	1.1604e-22	-4.85276	down	-2.94574	down	-3.25086	down	Homo sapiens chromosome 11 open reading frame 80 (C11orf80), transcript variant 1, mRNA [NM_024650]	chromosome 11 open reading frame 80	AATACCATTTGTGTATGATACCCAATTTGGATCTCAATTTGGATAGAGATTTGGTGCTTC
	A_23_P500998	HOXA9	9.75841e-21	1.19652e-22	2.06172	up	3.75197	up	4.18441	up	Homo sapiens homeobox A9 (HOXA9), mRNA [NM_152739]	homeobox A9	AAACAGTTGCATAGAGTATAGCTCTGTAGTGGAATATGTCTTCTGTATAACTAGGCTGTT
	A_23_P255104	LHFPL2	9.87051e-21	1.21222e-22	3.26697	up	2.77227	up	3.40015	up	Homo sapiens lipoma HMGIC fusion partner-like 2 (LHFPL2), mRNA [NM_005779]	lipoma HMGIC fusion partner-like 2	CCAAAAGAGTTAAAGGCACGACTGGGATTTCTTCTGAGACTGTGGTGAAACTCCTTCCAA
	A_33_P3391626		9.99022e-21	1.22889e-22	-2.33703	down	-2.36728	down	-2.7139	down	ribosomal protein S4X pseudogene 20 [Source:HGNC Symbol;Acc:HGNC:36437] [ENST00000505751]		TTGATGTGGTTCATGTGAAAGATGCCAATGGCAACAGATTTGCCCCTTGGCTTTCCAACA
	A_32_P108655	AK4	1.01929e-20	1.25583e-22	3.6525	up	2.87769	up	3.21528	up	Homo sapiens adenylate kinase 4 (AK4), transcript variant 1, mRNA [NM_001005353]	adenylate kinase 4	TGAAGAGGATCTTATTAAACTGCTGGTCTGACTTTATGGATTGACACTGTTCATTTCTTT
	A_33_P3889862	LOC151475	1.04225e-20	1.28774e-22	5.72075	up	6.27213	up	6.13526	up	Homo sapiens uncharacterized LOC151475 (LOC151475), long non-coding RNA [NR_040038]	uncharacterized LOC151475	TATGATGTGTAAATGTGGGGGAGGTTCAATGAGAGGTGGCCCAGAATACTTGTATAGGAA
	A_33_P3718734	LOC729083	1.04225e-20	1.28823e-22	2.80145	up	1.89664	up	1.86643	up	Homo sapiens uncharacterized LOC729083 (LOC729083), long non-coding RNA [NR_122070]	uncharacterized LOC729083	GCCATGTTATGATGGTGAGTGAAGGAAGCAGGACGCAATATAGCAATGCTAAATAAAAAA
	A_33_P3334828	INSL3	1.05641e-20	1.3078e-22	3.74862	up	5.32142	up	4.67628	up	Homo sapiens insulin-like 3 (Leydig cell) (INSL3), transcript variant 1, mRNA [NM_001265587]	insulin-like 3 (Leydig cell)	CGCTCCCTGCATGTGTAACACCCCTTCTTGCTGTCTCTTAGTAAATAAACGACCCAAAGC
	A_33_P3385101	TOLLIP	1.05732e-20	1.31102e-22	2.87402	up	2.13674	up	1.98214	up	Homo sapiens toll interacting protein (TOLLIP), mRNA [NM_019009]	toll interacting protein	CCAGGGTGTTGGAGGTGGTGGAGCGCCTTCCGATTCCATTCATGGCATTTTGTGATGTGA
	A_21_P0008483	LINC01550	1.09285e-20	1.35723e-22	-2.96584	down	-4.17422	down	-3.83394	down	long intergenic non-protein coding RNA 1550 [Source:HGNC Symbol;Acc:HGNC:20111] [ENST00000512901]	long intergenic non-protein coding RNA 1550	ATTTATATTCATCTGACTCCAGAAAGTTCCTGAGATTCCTCTGCTTCATCATCTTTCCCA
	A_33_P3224426		1.11303e-20	1.38449e-22	5.21357	up	3.38553	up	3.74825	up	Homo sapiens cDNA FLJ43050 fis, clone BRTHA3005046. [AK125040]		AGAGCTGGGGTTCATGGGCAGAGTGGTGAGCGACGGAGAACTGGGGTTCGTGAGCAGAGT
	A_23_P87709	PLBD1	1.11314e-20	1.38681e-22	3.09809	up	3.01366	up	2.66155	up	Homo sapiens phospholipase B domain containing 1 (PLBD1), mRNA [NM_024829]	phospholipase B domain containing 1	GACTAGAAGACTGTAAATAAGATACCAAAGGCACTATTTTAGCTATGTTTTTCCCATCAG
	A_33_P3267612	MIR143HG	1.16768e-20	1.45707e-22	4.95367	up	5.05365	up	4.79009	up	Homo sapiens MIR143 host gene (non-protein coding) (MIR143HG), transcript variant 1, long non-coding RNA [NR_105059]	MIR143 host gene (non-protein coding)	AAAGAAGGGCCTCGTTAAGAAGTGGAACCTGGGACCCCCAAGCGGTGTCTCTCATCCTGA
	A_23_P127175	SAR1A	1.17601e-20	1.46979e-22	2.42012	up	1.90258	up	1.7918	up	Homo sapiens secretion associated, Ras related GTPase 1A (SAR1A), transcript variant 2, mRNA [NM_020150]	secretion associated, Ras related GTPase 1A	GAGGGTTTCCGCTGGCTCTCCCAGTATATTGACTGATGTTTGGACGGTGAAAATAAAAGA
	A_24_P336983	CAPN13	1.17746e-20	1.47391e-22	5.05771	up	11.9358	up	9.91006	up	Homo sapiens calpain 13 (CAPN13), mRNA [NM_144575]	calpain 13	AAAGGACTCTACCTGACAGAAATGGAGTGGATGAGCCTGGTCATGTACAACTGAAGCAAA
	A_23_P132915	FAM114A1	1.19447e-20	1.49756e-22	2.46577	up	2.6156	up	2.47777	up	Homo sapiens family with sequence similarity 114, member A1 (FAM114A1), transcript variant 1, mRNA [NM_138389]	family with sequence similarity 114, member A1	AGGTCCTTAACCCCATGATCAGTAGTGTATTGTTAGAGGGCTGCAACAGTACAACGTACA
	A_21_P0014922	C18orf61	1.20708e-20	1.51574e-22	3.84475	up	2.78404	up	3.30019	up	Homo sapiens uncharacterized LOC497259 (C18orf61), long non-coding RNA [NR_049896]	uncharacterized LOC497259	CAAAAACTCTAGAGGTGGGGGTGGGTGTGATCTGGAAATCCCTGCTGTAATCTTTTTAAG
	A_23_P29994	RBPJ	1.22397e-20	1.53937e-22	3.08566	up	2.39838	up	2.30838	up	Homo sapiens recombination signal binding protein for immunoglobulin kappa J region (RBPJ), transcript variant 4, mRNA [NM_203284]	recombination signal binding protein for immunoglobulin kappa J region	AAAGGAGAAAAAATGAACAATCGTTTGTGGTTTCTTGGGAAAACTTTTCATACCAGGTGA
	A_23_P58321	CCNA2	1.22514e-20	1.54326e-22	-1.00839	down	2.66673	up	2.00037	up	Homo sapiens cyclin A2 (CCNA2), mRNA [NM_001237]	cyclin A2	AAGTTTGATAGATGCTGACCCATACCTCAAGTATTTGCCATCAGTTATTGCTGGAGCTGC
	A_24_P379750	MXD1	1.23046e-20	1.55386e-22	5.4092	up	3.68092	up	4.07604	up	Homo sapiens MAX dimerization protein 1 (MXD1), transcript variant 1, mRNA [NM_002357]	MAX dimerization protein 1	TCCAGATGTTTCTTTATGTAAATATGACGCCAATGTAAATCCTGTGTCAAGATCATAGAG
	A_21_P0014785	VIM-AS1	1.23046e-20	1.55481e-22	4.41439	up	3.08784	up	2.71626	up	Homo sapiens VIM antisense RNA 1 (VIM-AS1), transcript variant 1, long non-coding RNA [NR_108061]	VIM antisense RNA 1	TTCAGCTCCTGCAGCTCCACCTTCTCGTTGGTGCGGGTGTTCTTGAACTCGGTGTTGATG
	A_19_P00316341	LOC100506860	1.24257e-20	1.57257e-22	6.9052	up	5.27504	up	4.23111	up	Homo sapiens uncharacterized LOC100506860 (LOC100506860), long non-coding RNA [NR_109780]	uncharacterized LOC100506860	CTTTAGGCGTAAAGGCGGTCTCTCTCTAGGCTGATCAAACAGCCCTTTGCCCAGTGCTAA
	A_23_P85903	TLR5	1.26636e-20	1.60517e-22	3.77986	up	4.18992	up	4.32671	up	Homo sapiens toll-like receptor 5 (TLR5), mRNA [NM_003268]	toll-like receptor 5	AACAGTAGAAAGATCGTTTGTCTTGTGAGCAGACACTTCCTTAGAGATGGCTGGTGCCTT
	A_24_P407235	CRY1	1.27397e-20	1.61732e-22	-3.46729	down	-3.23915	down	-3.30045	down	Homo sapiens cryptochrome circadian clock 1 (CRY1), mRNA [NM_004075]	cryptochrome circadian clock 1	ATTAGTATAGACCCATCGATATATTTTTGATAATTTTTCATGTATGGTAAAGTTAAAATG
	A_33_P3340847	CARD6	1.29248e-20	1.64337e-22	4.44848	up	4.51285	up	4.29694	up	Homo sapiens caspase recruitment domain family, member 6 (CARD6), mRNA [NM_032587]	caspase recruitment domain family, member 6	AGTTATGAGGGATCAGAAACCAGCCTTTCATTGGAGGAGGAACAGGAGAAAAGTATAGAA
	A_33_P3260654		1.32278e-20	1.68451e-22	-4.48057	down	-4.71626	down	-4.10944	down	T cell receptor beta constant 1 [Source:HGNC Symbol;Acc:HGNC:12156] [ENST00000610439]		ATCCTCTATGAGATCTTGCTAGGGAAGGCCACCTTGTATGCCGTGCTGGTCAGTGCCCTC
	A_33_P3424577		1.32462e-20	1.68946e-22	-3.88614	down	-4.49223	down	-3.95472	down	T cell receptor beta constant 1 [Source:HGNC Symbol;Acc:HGNC:12156] [ENST00000613594]		TTTACCTCGGTGTCCTACCAGCAAGGGGTCCTGTCTGCCACCATCCTCTATGAGATCCTG
	A_21_P0010642	LOC101929023	1.36108e-20	1.73864e-22	2.85277	up	3.18489	up	4.09285	up	Homo sapiens uncharacterized LOC101929023 (LOC101929023), transcript variant 2, long non-coding RNA [NR_125973]	uncharacterized LOC101929023	ACTTACTGTGTCTCTGTTTGATTGAGCCTGGGCATGAGATAAAACACGAGGTCATCTGCA
	A_33_P3314810		1.36277e-20	1.74349e-22	7.82845	up	6.03322	up	5.22645	up	capicua transcriptional repressor pseudogene 5 [Source:HGNC Symbol;Acc:HGNC:37754] [ENST00000424045]		AGGGCTTTGGTGGGAAGGTATTTGCACCTGTCATTCCTTCCTCCTTTACTCCTGCCGCCC
	A_23_P50368	OSCAR	1.36605e-20	1.75038e-22	3.10212	up	2.78816	up	2.6136	up	Homo sapiens osteoclast associated, immunoglobulin-like receptor (OSCAR), transcript variant 1, mRNA [NM_206818]	osteoclast associated, immunoglobulin-like receptor	GGGACCTGGAGAACTTTTCTGTCTTACAAGAGGATTGTAAAATGGACCAATCAGCACTCT
	A_33_P3277728	ITSN1	1.46521e-20	1.88032e-22	3.81817	up	3.13781	up	2.97794	up	Homo sapiens intersectin 1 (SH3 domain protein) (ITSN1), transcript variant 2, mRNA [NM_001001132]	intersectin 1 (SH3 domain protein)	CCCTGACTGGTGGAAAGGAGAAGTCAATGGACAAGTGGGGCTCTTCCCATCCAATTATGT
	A_19_P00320155	IPW	1.47703e-20	1.89841e-22	-5.11031	down	-4.0211	down	-4.44625	down	Homo sapiens imprinted in Prader-Willi syndrome (non-protein coding) (IPW), long non-coding RNA [NR_023915]	imprinted in Prader-Willi syndrome (non-protein coding)	ATTTTTTACACACTTTTCAACTTTGTTTTTGTTATAAGAATGTGTATGATTGTTACATGT
	A_32_P87697	HLA-DRA	1.48361e-20	1.90979e-22	-2.29666	down	-3.67672	down	-3.90014	down	Homo sapiens major histocompatibility complex, class II, DR alpha (HLA-DRA), mRNA [NM_019111]	major histocompatibility complex, class II, DR alpha	AGAAGATCACTGAAGAAACTTCTGCTTTAATGGCTTTACAAAGCTGGCAATATTACAATC
	A_33_P3261246	RPL37	1.63392e-20	2.1065e-22	-1.40744	down	-1.75968	down	-1.85179	down	Homo sapiens ribosomal protein L37 (RPL37), mRNA [NM_000997]	ribosomal protein L37	CTTCAGAACATTCACTTATAAAGAAACCCTGCTGATTAAATCTCTCTTGGGCTTCCTCCC
	A_19_P00317789	LOC93622	1.67693e-20	2.16526e-22	-1.83435	down	-2.53434	down	-2.40957	down	Homo sapiens Morf4 family associated protein 1-like 1 pseudogene (LOC93622), non-coding RNA [NR_015433]	Morf4 family associated protein 1-like 1 pseudogene	AAACAACTTTGTTATAATACAGTCTCTGCCACAGATGCATGTGACCTCTTCAGGGGCCCA
	A_23_P383986	CHST15	1.73658e-20	2.24569e-22	3.06323	up	1.80227	up	1.94971	up	Homo sapiens carbohydrate (N-acetylgalactosamine 4-sulfate 6-O) sulfotransferase 15 (CHST15), transcript variant 1, mRNA [NM_015892]	carbohydrate (N-acetylgalactosamine 4-sulfate 6-O) sulfotransferase 15	ATTGAAGTTCCTTTTTGTTCTCAAAAGTTGTGACCGTGTTAAATTGTACTCCCTTAGTCC
	A_23_P152548	SCPEP1	1.75318e-20	2.27062e-22	3.59912	up	3.19581	up	2.51631	up	Homo sapiens serine carboxypeptidase 1 (SCPEP1), mRNA [NM_021626]	serine carboxypeptidase 1	CTGTATCTAACTGGGGCTGTGATCAAGAAGGTTCTGACCAGCTTCTGCAGAGGATAAAAT
	A_19_P00802201		1.81317e-20	2.35546e-22	1.64193	up	3.6067	up	2.4195	up	CCNB2 pseudogene 1 [Source:HGNC Symbol;Acc:HGNC:50850] [ENST00000399411]		ATTCCTGAAGATCAGCATGATCCCTCAGCTGAACTCAAAAGCCATCAAAGACCTTGCCTT
	A_23_P1962	RARRES3	1.81317e-20	2.35382e-22	-3.1234	down	-3.30229	down	-2.92401	down	Homo sapiens retinoic acid receptor responder (tazarotene induced) 3 (RARRES3), mRNA [NM_004585]	retinoic acid receptor responder (tazarotene induced) 3	AGGCGTTCTCTAGATCCTTTCCTCTGTTTCCCTCTCTCGCTGGCAAAAGTATGATCTAAT
	A_23_P154585	SNX21	1.86508e-20	2.42657e-22	3.10415	up	2.80399	up	2.11842	up	Homo sapiens sorting nexin family member 21 (SNX21), transcript variant 4, mRNA [NM_001042633]	sorting nexin family member 21	CTGGAGTCCTGGAGTTAAGGGATGAAGGCAAGGCTGCAGGTCTGGCCCAGGGGAATTAAA
	A_21_P0013775	ARMCX4	1.88139e-20	2.45151e-22	4.25045	up	3.43037	up	3.19598	up	armadillo repeat containing, X-linked 4 [Source:HGNC Symbol;Acc:HGNC:28615] [ENST00000431677]	armadillo repeat containing, X-linked 4	CATTCAGTGTCTGCTACCTCCTGTCTGTTATGCTTGTGTCTGGTTTTTTCAAGTTTTAAT
	A_33_P3303562		1.88961e-20	2.46595e-22	4.04055	up	2.77219	up	2.90586	up			AATGTTGTGAAAGTCCTTTGACCTGGTTCTGGGCTCTCACTAATCCTGATACCTAACCAC
	A_23_P47517	VPS37C	1.90108e-20	2.48466e-22	2.77197	up	1.92353	up	1.67479	up	Homo sapiens vacuolar protein sorting 37 homolog C (S. cerevisiae) (VPS37C), mRNA [NM_017966]	vacuolar protein sorting 37 homolog C (S. cerevisiae)	TAAGTTATTTATAAAGAGAAATCACTAATGGACTCTACTGGTTTGAGTGCTTCTGAGCTG
	A_21_P0000676	FLJ21408	1.93307e-20	2.53028e-22	4.7368	up	2.51141	up	2.80764	up	Homo sapiens uncharacterized LOC400512 (FLJ21408), long non-coding RNA [NR_037184]	uncharacterized LOC400512	TAAATTTCCGAATACTTTCAGCTACTAATCCCAGTGTACCCAATTAAAAATGGCTTTCCT
	A_33_P3294237	MTF1	1.93826e-20	2.54088e-22	2.77369	up	2.93608	up	2.44766	up	Homo sapiens metal-regulatory transcription factor 1 (MTF1), mRNA [NM_005955]	metal-regulatory transcription factor 1	GTTACAGGTTCAGTACTTCCAAAGGAAGAAACCTCCAAACCCAAAAAAGAATAAATATGA
	A_23_P170337	ALDH4A1	2.06304e-20	2.70854e-22	2.35869	up	2.05079	up	1.84319	up	Homo sapiens aldehyde dehydrogenase 4 family, member A1 (ALDH4A1), transcript variant P5CDhL, mRNA [NM_003748]	aldehyde dehydrogenase 4 family, member A1	TGGTGCCAGCTGGGCTGGGTGTGGGTTCTGTGTCCTTCCAGGATATGTGTCATTTCCCAT
	A_19_P00319532	LINC00963	2.07105e-20	2.72313e-22	4.33768	up	2.8442	up	4.19111	up	long intergenic non-protein coding RNA 963 [Source:HGNC Symbol;Acc:HGNC:48716] [ENST00000453213]	long intergenic non-protein coding RNA 963	GGAGACAGGCAAAGAGAACCACATGTGACATGGTGGGACATGCCGGAATCTTCCAGAGAG
	A_23_P92334	TMEM156	2.08915e-20	2.75105e-22	-5.01589	down	-3.21016	down	-3.34363	down	Homo sapiens transmembrane protein 156 (TMEM156), transcript variant 1, mRNA [NM_024943]	transmembrane protein 156	TGAAGAATACTCAGAAGTTTATTTTGTGAATGAGTAGACTGGAAAATGTTTGTGTCCAGC
	A_23_P21057	2001-09-01	2.14729e-20	2.83185e-22	-5.2078	down	-4.47475	down	-4.15139	down	Homo sapiens septin 1 (SEPT1), mRNA [NM_052838]	septin 1	ATTTCCTGAACCTGCGACGGATGCTGGTGCAGACACACCTGCAGGACCTGAAAGAGGTGA
	A_24_P167338	RAB30	2.14959e-20	2.83911e-22	-4.43382	down	-2.63926	down	-2.93389	down	Homo sapiens RAB30, member RAS oncogene family (RAB30), transcript variant 2, mRNA [NM_014488]	RAB30, member RAS oncogene family	TTCCTTGACTTAGCATGCCGACTCATCAGTGAAGCCAGACAGAACACACTTGTGAACAAT
	A_23_P21495	FCGBP	2.15242e-20	2.8471e-22	-3.40034	down	-5.41735	down	-4.93477	down	Homo sapiens Fc fragment of IgG binding protein (FCGBP), mRNA [NM_003890]	Fc fragment of IgG binding protein	TCAGTCATCCACCAGGAACGAAGATTTCCTGAAGAAGACCTGGTCCCTCTGGAGGTTGCG
	A_21_P0007222	LOC101927056	2.17524e-20	2.88157e-22	-3.17637	down	-3.35551	down	-3.13735	down	Homo sapiens uncharacterized LOC101927056 (LOC101927056), transcript variant 1, long non-coding RNA [NR_125395]	uncharacterized LOC101927056	GGCACTTTGAGCTACAGATGAGTTTAAATACTTTGTGTTTTTCTTAGTCAAACATGTGCA
	A_33_P3250671	TCF7	2.17657e-20	2.88762e-22	-4.58503	down	-5.62646	down	-4.6083	down	Homo sapiens transcription factor 7 (T-cell specific, HMG-box) (TCF7), transcript variant 1, mRNA [NM_003202]	transcription factor 7 (T-cell specific, HMG-box)	AGCCAAGGTCATTGCAGAGTGCACACTTAAGGAGAGCGCTGCCATCAACCAGATCCTGGG
	A_23_P89902	RTN2	2.22705e-20	2.95898e-22	1.78552	up	2.63952	up	2.53892	up	Homo sapiens reticulon 2 (RTN2), transcript variant 1, mRNA [NM_005619]	reticulon 2	CAGGATCACTCCCACTAGGGACTCTGCGCTAATTACCTGAGCGACCAGGACTACATTTCC
	A_24_P35891	ZNF219	2.24209e-20	2.98339e-22	3.23182	up	1.76297	up	1.71797	up	Homo sapiens zinc finger protein 219 (ZNF219), transcript variant 1, mRNA [NM_016423]	zinc finger protein 219	GCGTGAGAGTTTATTTTTGTACAAGGGGTGAGGGTGGGGGGCACTGTACCCTTCTAGCCC
	A_21_P0008385	lnc-C14orf177-3	2.25225e-20	3.00134e-22	-3.53166	down	-4.12426	down	-4.16344	down	DB346506 THYMU3 Homo sapiens cDNA clone THYMU3034661 3', mRNA sequence [DB346506]	lnc-C14orf177-3:2	AAGTCAATGCTGAAAATGTTGGCCACACAAAAACATCTGCACCGTCGGAAGGAACAGAAG
	A_33_P3589722	ATM	2.37146e-20	3.16488e-22	-2.5889	down	-2.23765	down	-2.13509	down	Homo sapiens ATM serine/threonine kinase (ATM), mRNA [NM_000051]	ATM serine/threonine kinase	CTGAGAATAGCAAAACCAAATGTATCAGCCTCAACACAAGCCTCCAGGCAGAAAAAGATG
	A_21_P0003974		2.43521e-20	3.25475e-22	8.70145	up	6.88276	up	7.09006	up	PREDICTED: Homo sapiens uncharacterized LOC101929544 (LOC101929544), ncRNA [XR_241746]		TGTGTTTCCAATTCCAGTAGACCCTTTGATGCGTTCTGAATAAATATTCCTTTTGGAATT
	A_21_P0001080		2.44896e-20	3.27796e-22	4.0989	up	4.78329	up	5.51128	up	RST8688 Athersys RAGE Library Homo sapiens cDNA, mRNA sequence [BG189643]		GACGTCCTGGAGAAACCTCTGGAAAAACAGAAATTTTATGACCCACAATTAAAATGATTT
	A_33_P3214948	SPOCK2	2.59812e-20	3.48274e-22	-3.22629	down	-3.64527	down	-3.40004	down	Homo sapiens sparc/osteonectin, cwcv and kazal-like domains proteoglycan (testican) 2 (SPOCK2), transcript variant 2, mRNA [NM_014767]	sparc/osteonectin, cwcv and kazal-like domains proteoglycan (testican) 2	CTCAGCCTAAGGAAACAAGTACACTCCACACATGCATAAAGGAAATCAAATGTTATTTTT
	A_24_P261259	PFKFB3	2.61349e-20	3.50848e-22	7.5006	up	6.26506	up	4.50173	up	Homo sapiens 6-phosphofructo-2-kinase/fructose-2,6-biphosphatase 3 (PFKFB3), transcript variant 1, mRNA [NM_004566]	6-phosphofructo-2-kinase/fructose-2,6-biphosphatase 3	AATAACGGGGACCAATATTTTTAACTTTGCCTATTTGTTTTTGGGTGAGTTTCCCCCCTC
	A_33_P3396181	LOC93432	2.72085e-20	3.65797e-22	5.66363	up	15.1524	up	14.612	up	Homo sapiens maltase-glucoamylase (alpha-glucosidase) (LOC93432), mRNA [NM_001293626]	maltase-glucoamylase (alpha-glucosidase)	TTTTATGGGATTGATTGTTGCTTTGGATGACAATGGGACAGCTGAAGGCCAGGTGTTCTG
	A_23_P205738	BCL11B	2.73577e-20	3.68343e-22	-4.18855	down	-4.67213	down	-4.52296	down	Homo sapiens B-cell CLL/lymphoma 11B (zinc finger protein) (BCL11B), transcript variant 1, mRNA [NM_138576]	B-cell CLL/lymphoma 11B (zinc finger protein)	AAACCCGTGATTTTGGTGCTCCTTGTAACTCAGCCCTGCAAAGCAAAGTCCCATTGATTT
	A_32_P15706	XLOC_l2_013837	2.73877e-20	3.69286e-22	5.17488	up	3.60266	up	3.65343	up	BROAD Institute lincRNA (XLOC_l2_013837), lincRNA [TCONS_l2_00026576]		TTTCGGCAACTTGTACAGGCCCAACTCCTCCCTCACGGTGGCCTCTTTTCGCCCAACTCA
	A_33_P3247890		2.74894e-20	3.712e-22	-3.81971	down	-4.71979	down	-4.34197	down	T cell receptor alpha variable 1-2 [Source:HGNC Symbol;Acc:HGNC:12102] [ENST00000390423]		TAAAGGGTACAGTTACCTCCTTTTGAAGGAGCTCCAGATGAAAGACTCTGCCTCTTACCT
	A_23_P68031	STAT4	2.80888e-20	3.79847e-22	-3.81785	down	-3.55222	down	-3.33772	down	Homo sapiens signal transducer and activator of transcription 4 (STAT4), transcript variant 1, mRNA [NM_003151]	signal transducer and activator of transcription 4	CCATGTCTCCAAGTGTGTATGCGGTGTTGAGAGAAAACCTGAGTCCCACAACAATTGAAA
	A_33_P3337161	ADCY4	2.85637e-20	3.86833e-22	4.47554	up	3.37087	up	3.49293	up	Homo sapiens adenylate cyclase 4 (ADCY4), transcript variant 3, mRNA [NM_001198568]	adenylate cyclase 4	ACTGAGAATAGCCTTGGGCACCGCCACCATCCTCCTTGTCTTTGCCATGGCCATTACCAG
	A_32_P65616	PRL	2.92632e-20	3.96883e-22	5.43424	up	9.7167	up	6.14668	up	Homo sapiens prolactin (PRL), transcript variant 1, mRNA [NM_000948]	prolactin	TCATCTATTTCTGAGAAGGTCCTTAATGATCCGTTCCATTGCAAGCTTCTTTTAGTTGTA
	A_32_P116556	ZNF469	2.93953e-20	3.99254e-22	1.12223	up	-1.63286	down	-1.84119	down	Homo sapiens zinc finger protein 469 (ZNF469), mRNA [NM_001127464]	zinc finger protein 469	GGGGCCCTGAGGTTGTACTGTAAACATCATAGTGACTTGTCTTTTCAAATATATTCCCAC
	A_33_P3414389	SH2B2	2.98531e-20	4.06649e-22	2.96047	up	2.18814	up	2.18914	up	Homo sapiens SH2B adaptor protein 2 (SH2B2), mRNA [NM_020979]	SH2B adaptor protein 2	ACGCCAAGCTCTTCAGTGAAGACACGATGTTATTAAAAGCCTGTTTTAGGGACTGCAAAA
	A_33_P3229968		2.98531e-20	4.06622e-22	-5.31903	down	-5.83918	down	-5.76105	down	T cell receptor beta variable 2 [Source:HGNC Symbol;Acc:HGNC:12195] [ENST00000455382]		TTCTCAGTTGAAAGGCCTGATGGATCAAATTTCACTCTGAAGATCCGGTCCACAAAGCTG
	A_33_P3288104	DAAM2	3.10095e-20	4.23012e-22	6.13347	up	15.1891	up	14.0345	up	dishevelled associated activator of morphogenesis 2 [Source:HGNC Symbol;Acc:HGNC:18143] [ENST00000405961]	dishevelled associated activator of morphogenesis 2	CTGATGTTTATTACATGCCAGCCCTGTTCTAGGTGTTGGAGGAACAACAGTGAATAAAAT
	A_24_P68019	ZNF551	3.13549e-20	4.28343e-22	-2.46121	down	-2.76128	down	-2.87533	down	Homo sapiens zinc finger protein 551 (ZNF551), transcript variant 1, mRNA [NM_138347]	zinc finger protein 551	GATGGAATGACTCTTCTAAAAGTTCATCTACAAATTTTCCAGTGAATATGGTTGTGTAGG
	A_23_P112798	CRIP2	3.13553e-20	4.28965e-22	-3.88449	down	-5.13598	down	-4.32501	down	Homo sapiens cysteine-rich protein 2 (CRIP2), transcript variant 1, mRNA [NM_001312]	cysteine-rich protein 2	TATGGAATCCTCTTCGGACCCAAGGGAGTGAACACCGGTGCGGTGGGCAGCTACATCTAT
	A_23_P212126	COLQ	3.14012e-20	4.30213e-22	-5.07002	down	-3.89742	down	-3.51745	down	Homo sapiens collagen-like tail subunit (single strand of homotrimer) of asymmetric acetylcholinesterase (COLQ), transcript variant II, mRNA [NM_080538]	collagen-like tail subunit (single strand of homotrimer) of asymmetric acetylcholinesterase	CATCACCATTTTTCCTGAGTAGGGCTTAGTTTTATTCTGGAAAGACATCTCCAAGGTGAG
	A_33_P3715843	MGC40069	3.15075e-20	4.3229e-22	-3.43246	down	-6.09748	down	-5.28127	down	Homo sapiens hypothetical protein MGC40069, mRNA (cDNA clone IMAGE:5216694). [BC032242]	uncharacterized protein MGC40069	GTTCTGGAGGTTAATCCGTGTTCATTACCGTAATTGTTGAGAAGTTTCCTATTATATGAA
	A_23_P90601	STEAP3	3.22276e-20	4.42806e-22	4.54038	up	3.04736	up	2.30442	up	Homo sapiens STEAP family member 3, metalloreductase (STEAP3), transcript variant 1, mRNA [NM_182915]	STEAP family member 3, metalloreductase	CTCACCAGGCTACTGGCAGCAGCATCCCGAGAGCACATCATCTCCACAGCCTGGTAAATT
	A_23_P416711	ST6GALNAC3	3.26245e-20	4.48902e-22	3.96303	up	3.70439	up	3.22484	up	Homo sapiens ST6 (alpha-N-acetyl-neuraminyl-2,3-beta-galactosyl-1,3)-N-acetylgalactosaminide alpha-2,6-sialyltransferase 3 (ST6GALNAC3), transcript variant 1, mRNA [NM_152996]	ST6 (alpha-N-acetyl-neuraminyl-2,3-beta-galactosyl-1,3)-N-acetylgalactosaminide alpha-2,6-sialyltransferase 3	AATAAACAGAGACAAATGTTAAAATTGCCATACAGACTGTTTTTCCCCCTGTTGTTTCAC
	A_33_P3234472	LINC01270	3.29382e-20	4.53868e-22	11.0683	up	7.71226	up	9.56652	up	Homo sapiens long intergenic non-protein coding RNA 1270 (LINC01270), long non-coding RNA [NR_034124]	long intergenic non-protein coding RNA 1270	GGATATTTGGACTGTTTCCAGTTTTCAGCCATTATAAATAAAGCCACTAGAAACATTTGC
	A_23_P110212	ACSL1	3.3092e-20	4.56639e-22	7.16511	up	5.83553	up	5.68961	up	Homo sapiens acyl-CoA synthetase long-chain family member 1 (ACSL1), transcript variant 1, mRNA [NM_001995]	acyl-CoA synthetase long-chain family member 1	ACTCGGTTCTCCAGGCCTGATTCCCCGACTCCATCCTTTTTCAGGGTTATTTAAAAATCT
	A_24_P45451	SLAMF6	3.32245e-20	4.59123e-22	-8.65092	down	-4.98123	down	-4.94696	down	Homo sapiens SLAM family member 6 (SLAMF6), transcript variant 2, mRNA [NM_052931]	SLAM family member 6	TGCCTAACCTTTTGGAGCCTTAGTCTCCCAGACTGAAAAAGGAAGAGGATGGTATTACAT
	A_33_P3284508	CD14	3.4007e-20	4.70607e-22	2.55015	up	1.68805	up	1.63371	up	Homo sapiens CD14 molecule (CD14), transcript variant 3, mRNA [NM_001174104]	CD14 molecule	GTTGAGGACTTTTCGACCAATTCAACCCTTTGCCCCACCTTTATTAAAATCTTAAACAAC
	A_33_P3237605		3.44244e-20	4.77061e-22	6.9145	up	4.26515	up	6.16784	up			CCCACCTGGATGAATGGATGAGTGAAATAATGGGAGGATGGCTGGATGGCTGGATGGATG
	A_21_P0010655		3.52421e-20	4.89087e-22	-2.32481	down	-2.39845	down	-2.51269	down			TGAGACTTTGTGGTGGTGCCAAGGAAGAAGTATTACACCACTCCCAAGAAGAATACGCAT
	A_23_P126278	CHIT1	3.57753e-20	4.97193e-22	5.34992	up	5.30947	up	6.92578	up	Homo sapiens chitinase 1 (chitotriosidase) (CHIT1), transcript variant 1, mRNA [NM_003465]	chitinase 1 (chitotriosidase)	GGGCCACCAAACAGAGAATCCAGGATCAGAAGGTGCCCTACATCTTCCGGGACAACCAGT
	A_21_P0012674		3.70331e-20	5.15403e-22	1.71195	up	3.23624	up	2.05179	up			AAAGGAACCAAGGACTCTGATGATTCTGTAGAGAAGAGGAACCGTAGCTGCTCAAACGTT
	A_23_P138194	NCF2	3.80002e-20	5.29612e-22	4.96286	up	2.74891	up	2.75812	up	Homo sapiens neutrophil cytosolic factor 2 (NCF2), transcript variant 1, mRNA [NM_000433]	neutrophil cytosolic factor 2	TTACTGTAATTGGCTCTTAAGGCTTGAAGTAACCTTATAGGTTACTCATAAGGCATATAC
	A_21_P0010308	LINC00649	3.92045e-20	5.47169e-22	-3.09763	down	-3.04317	down	-2.76661	down	Homo sapiens long intergenic non-protein coding RNA 649 (LINC00649), long non-coding RNA [NR_038883]	long intergenic non-protein coding RNA 649	TCTGTCACCTCTTTCTAAAAGCTGGGAAATGGTTATTGTCAACGCCAGCCCCATTTTGGA
	A_33_P3671506	LOC153811	3.9414e-20	5.50869e-22	3.96505	up	3.05027	up	3.49837	up	Homo sapiens cDNA FLJ11672 fis, clone HEMBA1004733. [AK021734]	uncharacterized LOC153811	GTCACCTGCACTCATCTTGGGTTTTCCTTCCTTTTCCACCCTAAGCTGAAGGTATTTTTT
	A_21_P0001647		3.94445e-20	5.52852e-22	3.97464	up	3.27389	up	3.43399	up			ACTGTATAACCTAAGAGTCGGGTGCAGGCTTGATAAAGAATTGGAAGCCCTCTGCAAAAC
	A_33_P3540143	IL17RA	3.94445e-20	5.52151e-22	2.95194	up	2.7392	up	2.96942	up	Homo sapiens interleukin 17 receptor A (IL17RA), transcript variant 1, mRNA [NM_014339]	interleukin 17 receptor A	TAAATAATGACATAGTTCCAGTTGATGGCCAAAGCCACAGCTAACGAGAGGCAGAGAGAG
	A_33_P3298810	FFAR3	4.09246e-20	5.74403e-22	10.4476	up	12.5723	up	9.12038	up	Homo sapiens free fatty acid receptor 3 (FFAR3), mRNA [NM_005304]	free fatty acid receptor 3	GTTCCCATTGCTCAATAAATGTGGATCATCAGAGACATTTATGAACAATGACAGAAGAAA
	A_24_P18105	ASPH	4.13487e-20	5.81171e-22	6.64583	up	6.13643	up	5.75831	up	Homo sapiens aspartate beta-hydroxylase (ASPH), transcript variant 3, mRNA [NM_032466]	aspartate beta-hydroxylase	GCTCTGTTGAAAATAATCCTTTGTCAGAAAAGAAGGTAGCTACCACATCATTTTGAAAGG
	A_23_P344853	WDR43	4.15289e-20	5.84522e-22	-2.4762	down	-2.59678	down	-2.77714	down	Homo sapiens WD repeat domain 43 (WDR43), mRNA [NM_015131]	WD repeat domain 43	ACAAAACCATTATCTTTGAGGGAGTTTTTAATACCAATGACAGAACAGAGATTTGTGTGC
	A_24_P29733	CDK14	4.19076e-20	5.90678e-22	1.21375	up	2.16891	up	1.9218	up	Homo sapiens cyclin-dependent kinase 14 (CDK14), transcript variant 2, mRNA [NM_012395]	cyclin-dependent kinase 14	TGTGTATATGACAGCCAGTATAATCAATACCCTAGGTTATGCGTCTATATGATACTCATC
	A_33_P3345812	GPER1	4.20356e-20	5.93311e-22	4.87124	up	4.84076	up	3.84729	up	Homo sapiens G protein-coupled estrogen receptor 1 (GPER1), transcript variant 3, mRNA [NM_001039966]	G protein-coupled estrogen receptor 1	GGAAACCTCACGACTGGTCACCTTGCACTCCTCACACAGAATTGCTACAATCCCAAAGCG
	A_24_P200023	IL1R1	4.21012e-20	5.95171e-22	5.84968	up	8.25001	up	7.61657	up	Homo sapiens interleukin 1 receptor, type I (IL1R1), transcript variant 1, mRNA [NM_000877]	interleukin 1 receptor, type I	ATAATTTTCCTCCTAAACAAAAACACATTGAGTTTAAGTCTCTGACTCTTGCCTTTCCAC
	A_33_P3363153	DNAJC5	4.21012e-20	5.95897e-22	2.13206	up	1.99312	up	1.92804	up	Homo sapiens DnaJ (Hsp40) homolog, subfamily C, member 5 (DNAJC5), mRNA [NM_025219]	DnaJ (Hsp40) homolog, subfamily C, member 5	AGGTTTGTGGAACCCAGTCCCCTGCAGAATCTGTAAAACCTAATAAATCATGGTTGTGGC
	A_33_P3414912	NPL	4.22565e-20	5.98928e-22	2.88841	up	2.94274	up	2.69839	up	Homo sapiens N-acetylneuraminate pyruvate lyase (dihydrodipicolinate synthase) (NPL), transcript variant 3, mRNA [NM_001200056]	N-acetylneuraminate pyruvate lyase (dihydrodipicolinate synthase)	ACCTGGGAAAAAAGACAAACCAGATGTTGGAGGCTTTTGAACAAAAGGACTTCTCTTTAG
	A_23_P37514	C15orf39	4.30756e-20	6.11387e-22	2.4579	up	1.42795	up	1.31456	up	Homo sapiens chromosome 15 open reading frame 39 (C15orf39), mRNA [NM_015492]	chromosome 15 open reading frame 39	TGGGCCTCATTTAAGGGATTCTGATGAGCCGATGGGCCCTGGAGGCAGCCCATTAAAGCA
	A_23_P200239	YIPF1	4.30767e-20	6.13687e-22	2.19147	up	1.97761	up	1.93497	up	Homo sapiens Yip1 domain family, member 1 (YIPF1), transcript variant 1, mRNA [NM_018982]	Yip1 domain family, member 1	AGAACCATGGAAAATTCTGATGTCCTCTCTCTGAATTATGTACAGACTACCTGGGGGATC
	A_33_P3799936	ARHGEF10L	4.30767e-20	6.1395e-22	1.58361	up	-2.07151	down	-1.71663	down	Homo sapiens Rho guanine nucleotide exchange factor (GEF) 10-like (ARHGEF10L), transcript variant 1, mRNA [NM_018125]	Rho guanine nucleotide exchange factor (GEF) 10-like	ATAAAGTCTGTACATATTGGAGCTCTGGGAGATGCTGGAATAAAAGACAAGAGTTACATC
	A_24_P116378	GCOM1	4.30767e-20	6.12283e-22	-3.52023	down	-3.11404	down	-3.24618	down	Homo sapiens GRINL1A complex locus 1 (GCOM1), transcript variant 1, mRNA [NM_001018090]	GRINL1A complex locus 1	ACACTGTCAATAATTATCGCTTTAATTGGTGTTAATATTTGGTAGTACACAGGTTCTCCC
	A_33_P3228837	CD8A	4.40154e-20	6.28197e-22	-3.67552	down	-3.75089	down	-3.55566	down	Homo sapiens CD8a molecule (CD8A), transcript variant 3, mRNA [NM_001145873]	CD8a molecule	TTGGCCGGGACTTGTGGGGTCCTTCTCCTGTCACTGGTTATCACCCTTTACTGCAACCAC
	A_32_P173662	CRISP2	4.43744e-20	6.34195e-22	4.16806	up	8.70198	up	7.07198	up	Homo sapiens cysteine-rich secretory protein 2 (CRISP2), transcript variant 1, mRNA [NM_003296]	cysteine-rich secretory protein 2	TACTACTATGTTTGCCAATATTGTCCTGCTGGTAATAATATGAATAGAAAGAATACCCCG
	A_33_P3221888		4.4437e-20	6.36842e-22	6.56864	up	4.07733	up	4.12245	up			TTGCTCGAGTCCTTGGCAGACGTCTCAATGGCACACAGGATGTCATAGTGCTCAGCCAGG
	A_23_P203305	IMMP1L	4.4437e-20	6.36706e-22	-3.25685	down	-2.6876	down	-2.49904	down	IMP1 inner mitochondrial membrane peptidase-like (S. cerevisiae) [Source:HGNC Symbol;Acc:HGNC:26317] [ENST00000278200]	IMP1 inner mitochondrial membrane peptidase-like (S. cerevisiae)	AAATCCTCACCACTAGTCCATCAGATTTCTTTAAAAGCCATAGTTATGTGCCAATGGGTC
	A_23_P166087	RASSF2	4.5313e-20	6.50289e-22	2.42513	up	1.97456	up	2.10275	up	Homo sapiens Ras association (RalGDS/AF-6) domain family member 2 (RASSF2), transcript variant 1, mRNA [NM_014737]	Ras association (RalGDS/AF-6) domain family member 2	GATGGTACATGACTTGATTCAACGTTTGGTTCTGAACTTACACACTGATGCGTTTACTCA
	A_23_P10559	AATK	4.59309e-20	6.60062e-22	5.88467	up	4.86321	up	4.2785	up	Homo sapiens apoptosis-associated tyrosine kinase (AATK), transcript variant 1, mRNA [NM_001080395]	apoptosis-associated tyrosine kinase	GGAAGTTGGGTGATTTTAAGTTATTGTTGCCAAAGAGATGTAAAGTTTATTGTTGCTTCG
	A_33_P3362392		4.6023e-20	6.632e-22	7.17853	up	4.60353	up	5.36602	up			CCAATGTGAATCTGGTCCCTTTTATCAAGGAAGAAATCGAATGTGCTCTTTTCCATAAGG
	A_32_P42725		4.6023e-20	6.62938e-22	4.55567	up	3.62456	up	3.78765	up			GCCTAGAGAGTCTGGAAGAATGTTCTCCAGAACTTTTCCAGCCCTATCCAACAGAATTCT
	A_24_P945113	ACVRL1	4.65464e-20	6.7166e-22	6.37233	up	3.87889	up	3.68466	up	Homo sapiens activin A receptor type II-like 1 (ACVRL1), transcript variant 1, mRNA [NM_000020]	activin A receptor type II-like 1	GGTGTTCCAGGGTCGAAATTACACTTCTCGTACCTGGAGACGCTGTTTGTGGGAGCACTG
	A_21_P0000546	DPPA2P3	4.68972e-20	6.77647e-22	4.86144	up	4.74956	up	3.73978	up	Homo sapiens developmental pluripotency associated 2 pseudogene 3 (DPPA2P3), non-coding RNA [NR_027764]	developmental pluripotency associated 2 pseudogene 3	CCCCATCTGAAGAGCACCTTTCTGTAAGTCTGAAAACTCATTAAAATAAAGTCACTGAAA
	A_23_P391275	RCAN3	4.75347e-20	6.87795e-22	-4.16407	down	-4.34629	down	-3.68443	down	Homo sapiens RCAN family member 3 (RCAN3), transcript variant 1, mRNA [NM_013441]	RCAN family member 3	TAAATTATGATTTACTCTGTGCTGTTTCCAAATTGGGACCAGGAGAGAAATATGAACTTC
	A_33_P3292864		4.84696e-20	7.02278e-22	4.22297	up	2.92689	up	3.34838	up	Homo sapiens mRNA for FLJ00369 protein. [AK090448]		CCCAGAAGGTGGAAGAGGTGGGTGCCTGGGCCCTGGGTGGGGGAAGGGCTAGCCCCTCCC
	A_33_P3267233		4.9977e-20	7.25181e-22	6.26256	up	3.96297	up	3.64662	up	Synthetic construct Homo sapiens gateway clone IMAGE:100021467 3' read TOM1 mRNA. [CU692315]		GAGAGGTTGGGCAATCGGTCCGCGGCTTTGGCCCGTTCTTCCAGGAATTTGTCAAATTCT
	A_24_P237778	MAN1C1	4.9977e-20	7.26089e-22	-4.88393	down	-5.16688	down	-5.06234	down	Homo sapiens mannosidase, alpha, class 1C, member 1 (MAN1C1), transcript variant 1, mRNA [NM_020379]	mannosidase, alpha, class 1C, member 1	TGGTTGATGTCGGGCAAGACAGATATGGAGGCTAAAAATATGTACTACGAAGCCTTGGAG
	A_33_P3231432	LDHB	5.03374e-20	7.32317e-22	-4.24721	down	-4.07421	down	-3.88446	down	Homo sapiens lactate dehydrogenase B (LDHB), transcript variant 2, mRNA [NM_001174097]	lactate dehydrogenase B	CCAGGAATTGAATCCAGAAATGGGAACTGACAATGATAGTGAAAATTGGAAGGAAGTGCA
	A_24_P11462	AZIN2	5.06812e-20	7.38319e-22	-2.9622	down	-3.50315	down	-3.37759	down	Homo sapiens antizyme inhibitor 2 (AZIN2), transcript variant 1, mRNA [NM_052998]	antizyme inhibitor 2	ACCTGCAGTGTTTCTGCCCTGTAAATAGGACCAGTCTTACACTCGCTGTAGTTCAAGTAT
	A_19_P00805833	ATF7IP2	5.49504e-20	8.01595e-22	-2.34136	down	-2.72306	down	-2.58825	down	activating transcription factor 7 interacting protein 2 [Source:HGNC Symbol;Acc:HGNC:20397] [ENST00000570163]	activating transcription factor 7 interacting protein 2	TCCTTGCTACTTGGTATCTTGAAATCTGGTACGAAACTATTGCATGATCCCTGCACCTTT
	A_24_P298360	LTBP3	5.50209e-20	8.03707e-22	-2.3129	down	-2.99672	down	-2.50577	down	Homo sapiens latent transforming growth factor beta binding protein 3 (LTBP3), transcript variant 2, mRNA [NM_021070]	latent transforming growth factor beta binding protein 3	CTGCTGTTGGGGAAGCCCCCAAGAGATGAGGACAGTTCAGAGGAGGATTCAGACGAGTGT
	A_24_P64100	SLC25A37	5.51141e-20	8.06156e-22	5.92644	up	4.35918	up	4.60246	up	solute carrier family 25 (mitochondrial iron transporter), member 37 [Source:HGNC Symbol;Acc:HGNC:29786] [ENST00000519973]	solute carrier family 25 (mitochondrial iron transporter), member 37	CTTAAATTTCTCAAATGCCTGTAGTAACTATTGTTTCTGCCTCTCAATTGTTGCCAGCTC
	A_33_P3272921	ARID3A	5.53523e-20	8.10731e-22	2.89005	up	2.54171	up	2.43896	up	Homo sapiens AT rich interactive domain 3A (BRIGHT-like) (ARID3A), mRNA [NM_005224]	AT rich interactive domain 3A (BRIGHT-like)	GGGTTTTGTTGTGTAAATATTCTATTTTATTCTTGGGGGGATCAAACCTTAGGAAAAGGA
	A_33_P3223663		5.58656e-20	8.1935e-22	9.73241	up	6.9951	up	5.52172	up			TCTGGGAACAGAGCTTGACAGGCAGAACACAGGTGATACATGGAATGGCTGGACGTGGTG
	A_32_P192823	PRPS1L1	5.59993e-20	8.22415e-22	-2.74725	down	-2.65496	down	-2.78334	down	Homo sapiens phosphoribosyl pyrophosphate synthetase 1-like 1 (PRPS1L1), mRNA [NM_175886]	phosphoribosyl pyrophosphate synthetase 1-like 1	GCTCCAAAATACGAGTAATTGACATCTCCATGATCCTTGCAGAAGCCATAAGGAGAACTC
	A_33_P3216557		5.64194e-20	8.29697e-22	6.84149	up	5.69614	up	6.04112	up	MMU41465 BCL-6 {Mus musculus} (exp=-1; wgp=0; cg=0), partial (7%) [THC2647179]		TAAGGTACAGAATGCAACTCAGGTCCCTTGTGTTTGATCTTTGAACAATTCATAGTCCAA
	A_23_P369641	MROH6	5.71803e-20	8.42013e-22	3.19609	up	3.71519	up	2.79937	up	Homo sapiens maestro heat-like repeat family member 6 (MROH6), mRNA [NM_001100878]	maestro heat-like repeat family member 6	CAGCATCCTAAGGCTCCTGGCGGGCATCCTCTCTGCTCAAAATTATTGACCTGTCTCCCG
	A_23_P427299	LOC646652	5.73202e-20	8.45204e-22	6.00759	up	4.3889	up	4.96143	up	PREDICTED: Homo sapiens integral membrane glycoprotein-like (LOC646652), misc_RNA [XR_427693]	integral membrane glycoprotein-like	AGGACGCTTTTCGGGTAGATCCTACTGCCACCCTAGCTATGGGCACATGTCAGAGTCCCA
	A_33_P3250680	CD40LG	5.73898e-20	8.47361e-22	-4.17041	down	-4.72599	down	-4.62433	down	Homo sapiens CD40 ligand (CD40LG), mRNA [NM_000074]	CD40 ligand	CTATTGTATCTACCTGCAGTCTCCATTGTTTCCAGAGTGAACTTGTAATTATCTTGTTAT
	A_32_P19519	LOC728175	5.85141e-20	8.65115e-22	2.51278	up	4.49834	up	6.05182	up		uncharacterized LOC728175	TCCCAGAAGAGATGGTCTGAGGTGTGTGAACACTGTGAATGTCATGGACAAAGCTCAGCG
	A_23_P392470	NR3C2	5.85304e-20	8.6651e-22	-3.71062	down	-4.1709	down	-4.36062	down	Homo sapiens nuclear receptor subfamily 3, group C, member 2 (NR3C2), transcript variant 1, mRNA [NM_000901]	nuclear receptor subfamily 3, group C, member 2	AATACAGTCAACTTACGGTGCACAGTAATATGAAAGCCACACTTTGAAGGTAATAAATAC
	A_33_P3352578	CLEC4D	5.95439e-20	8.82688e-22	4.01835	up	3.65171	up	3.28599	up	Homo sapiens C-type lectin domain family 4, member D (CLEC4D), mRNA [NM_080387]	C-type lectin domain family 4, member D	TATTTTCCTCTTACTGACAACAAGACGTGGGCTGAGAGTGAAAGGAACTGTTCAGGGATG
	A_33_P3858476	LINC01122	5.9544e-20	8.83864e-22	3.74369	up	3.39167	up	3.49894	up	Homo sapiens long intergenic non-protein coding RNA 1122 (LINC01122), long non-coding RNA [NR_033873]	long intergenic non-protein coding RNA 1122	GGCCTGTGAGCCAAATCTACCCCACTGCCTGTTTTTGTAAATAAAGCTTTATCAGAACAT
	A_33_P3237674		6.0023e-20	8.92157e-22	-10.6152	down	-8.0929	down	-7.11054	down	T cell receptor alpha constant [Source:HGNC Symbol;Acc:HGNC:12029] [ENST00000613353]		ACGAACCTAAACTTTCAAAACCTGTCAGTGATTGGGTTCCGAATCCTCCTCCTGAAAGTG
	A_23_P29153	RSPH14	6.144e-20	9.1443e-22	3.35236	up	3.77152	up	4.8227	up	Homo sapiens radial spoke head 14 homolog (Chlamydomonas) (RSPH14), mRNA [NM_014433]	radial spoke head 14 homolog (Chlamydomonas)	CCATCAGTGTCATCGAGTTCAAACCCTGAGCCCTTCATTCACCTCTGTGAGTGAATAAAT
	A_33_P3256232	MIIP	6.29411e-20	9.38012e-22	2.49887	up	2.45431	up	2.14106	up	Homo sapiens migration and invasion inhibitory protein (MIIP), mRNA [NM_021933]	migration and invasion inhibitory protein	GAGGGTGAGGGATTCTGTGGAAGTTTGTAAATAAAGCTCAGTGCTCTGCAGCTCAAGTCC
	A_24_P916718	ZNF467	6.32757e-20	9.44246e-22	3.56971	up	2.61465	up	2.78373	up	Homo sapiens zinc finger protein 467 (ZNF467), mRNA [NM_207336]	zinc finger protein 467	TGGAGGACGAAGATCAGGAGGCAGAAGAGGAGGTCGAATGGCCCCAGCATCTATCGTTAC
	A_21_P0005729		6.36896e-20	9.51678e-22	4.47498	up	4.34928	up	5.65183	up			TAGAGGAGCACTGAGTCAAATGAATCTCGGAGAAATGGAGCTGGAAGAAAACTGGAGAAT
	A_21_P0002529	lnc-SDPR-1	6.41801e-20	9.60272e-22	7.27608	up	5.34801	up	5.30432	up	LNCipedia lincRNA (lnc-SDPR-1), lincRNA [lnc-SDPR-1:1]	lnc-SDPR-1:1	TTCCCTGCTTCCATGGAATGGGTATACCACCGTCTATTTGCAAATCATCTACCATGGAGA
	A_19_P00805452	XLOC_l2_010558	6.52305e-20	9.77275e-22	-5.39031	down	-4.74388	down	-3.89177	down	BROAD Institute lincRNA (XLOC_l2_010558), lincRNA [TCONS_l2_00020391]		TGAAAACACAATTACAGTACAGTGTCCGCAATGCTGGTCTTTGATTCAACGCATAAATTG
	A_23_P414913	GLIPR2	6.54195e-20	9.81395e-22	4.29947	up	2.27699	up	2.32122	up	Homo sapiens GLI pathogenesis-related 2 (GLIPR2), transcript variant 1, mRNA [NM_022343]	GLI pathogenesis-related 2	TTAACAGCAGGCATCTGGGCAGGCCAGTCCTCAAAGCAGCTCCTGAAGGTCTGTGTTGCA
	A_23_P312358	BEND7	6.66719e-20	1.0015e-21	4.33708	up	4.98228	up	4.94008	up	Homo sapiens BEN domain containing 7 (BEND7), transcript variant 1, mRNA [NM_152751]	BEN domain containing 7	CGGAAAGGACTAGACCAAAATATTGTGGGTGCAATAAAAGTCTTCACAGAAAAGTACTGT
	A_23_P141974	TPM4	6.84796e-20	1.03e-21	1.68129	up	2.43757	up	2.21213	up	Homo sapiens tropomyosin 4 (TPM4), transcript variant Tpm4.2, mRNA [NM_003290]	tropomyosin 4	AGGCCAAAGAAGAGAACGTGGGCTTACATCAGACACTGGATCAGACACTAAACGAACTTA
	A_23_P104651	CDCA5	7.02334e-20	1.05776e-21	1.36345	up	3.55617	up	2.52875	up	Homo sapiens cell division cycle associated 5 (CDCA5), mRNA [NM_080668]	cell division cycle associated 5	TCACCAGATGATGCAGAGTTGAGATCATCATTGCAAAGTTCTCTGTTCCTGAGGAACTAA
	A_33_P3396389	IL1R1	7.15649e-20	1.07923e-21	4.25197	up	7.57216	up	7.67866	up	Homo sapiens interleukin 1 receptor, type I (IL1R1), transcript variant 1, mRNA [NM_000877]	interleukin 1 receptor, type I	TGGAAAAACAGTGTGGATATAAGCTGTTCATTTATGGAAGGGATGACTACGTTGGGGAAG
	A_33_P3392077	TP53I3	7.31052e-20	1.1039e-21	2.55405	up	3.33622	up	2.70605	up	Homo sapiens tumor protein p53 inducible protein 3 (TP53I3), transcript variant 1, mRNA [NM_004881]	tumor protein p53 inducible protein 3	ACGTCTGCTGCCGGTTCTGGACAGAATCTACCCAGTGACCGAAATCCAGGAGGCCCATAA
	A_23_P413634	ZNF329	7.33512e-20	1.10906e-21	-2.66962	down	-3.00781	down	-3.12589	down	Homo sapiens zinc finger protein 329 (ZNF329), mRNA [NM_024620]	zinc finger protein 329	TGTTGCTTTAGTTGTTGAAGCAAAAATACTGAGTTGTTATGTTTATGTTATCACCCCACC
	A_33_P3395389	ZNF420	7.43661e-20	1.12587e-21	-2.32937	down	-2.63349	down	-2.68439	down	Homo sapiens zinc finger protein 420 (ZNF420), mRNA [NM_144689]	zinc finger protein 420	CTCAGAGAGATTTGTATAGAGATGTGATGTTGGAGAACTATAGCAACTTGGTATCACTAG
	A_23_P128624	CARS2	7.45945e-20	1.1308e-21	3.47698	up	2.28729	up	2.24671	up	Homo sapiens cysteinyl-tRNA synthetase 2, mitochondrial (putative) (CARS2), mRNA [NM_024537]	cysteinyl-tRNA synthetase 2, mitochondrial (putative)	CTTCTCAGGGTCAAGGCTTTATGTTAAAGCTTCCTGTCGGGGCTGCTAGGTCAGCATTAA
	A_33_P3263423	TLR5	7.46642e-20	1.13333e-21	3.09509	up	2.99106	up	3.11123	up	Homo sapiens toll-like receptor 5 (TLR5), mRNA [NM_003268]	toll-like receptor 5	TTAAACAACCAGGGACCCTCTGCCCCTAGAATAAGAACATACTAGAAGTCCCTTCTGCTA
	A_23_P152807	RSAD1	7.58879e-20	1.1534e-21	-1.92108	down	-2.15745	down	-2.06303	down	Homo sapiens radical S-adenosyl methionine domain containing 1 (RSAD1), mRNA [NM_018346]	radical S-adenosyl methionine domain containing 1	TCTGAGAACTGGGAAAGATCAGAGCAAGCCTTGCCTCTTATCTTCGGGAAACCAGAATAT
	A_23_P203475	PRKCDBP	7.83429e-20	1.19225e-21	7.66599	up	4.50084	up	3.99888	up	Homo sapiens protein kinase C, delta binding protein (PRKCDBP), mRNA [NM_145040]	protein kinase C, delta binding protein	TCCCTTCCTTAAGCCCAGTCCTGTGTCCTCTGAAAGAGGTGCAGTCACTCACACCTGCTT
	A_33_P3352827	SLAMF1	8.36886e-20	1.27526e-21	-4.75382	down	-3.29675	down	-3.17678	down	Homo sapiens signaling lymphocytic activation molecule family member 1 (SLAMF1), transcript variant 1, mRNA [NM_003037]	signaling lymphocytic activation molecule family member 1	TTATCTAGGAGATCGCTACAAGTTTTATCTGGAGAATCTCACCCTGGGGATACGGGAAAG
	A_33_P3369461	AMIGO1	8.50054e-20	1.297e-21	-4.77421	down	-4.65517	down	-3.57995	down	Homo sapiens adhesion molecule with Ig-like domain 1 (AMIGO1), mRNA [NM_020703]	adhesion molecule with Ig-like domain 1	AAGAACAGATTCCCTAAACTTTCATGAGGTCATCCCTAGCTCCTTAAGAGAAAAACATTT
	A_23_P169437	LCN2	8.5818e-20	1.31278e-21	-1.03634	down	3.27716	up	2.78095	up	Homo sapiens lipocalin 2 (LCN2), mRNA [NM_005564]	lipocalin 2	GCTATGGTGTTCTTCAAGAAAGTTTCTCAAAACAGGGAGTACTTCAAGATCACCCTCTAC
	A_33_P3415086		8.5818e-20	1.31194e-21	-3.56576	down	-3.18788	down	-2.94642	down			TCTCGCTATAGCCTGTCTATCTACAGGAGATCTCGCTACAGCCGATCTCCCTACAGACGA
	A_23_P395566	FBXO31	8.61291e-20	1.31924e-21	-2.46896	down	-2.42096	down	-2.52817	down	Homo sapiens F-box protein 31 (FBXO31), transcript variant 1, mRNA [NM_024735]	F-box protein 31	CCTTGAAGATTCACCATTGTTTAAATAAAATCAAGCAAATGCTTTTTTACCAAGAGCCCG
	A_33_P3312802	RPL13AP17	8.72524e-20	1.33816e-21	2.93511	up	2.81162	up	2.61663	up	Homo sapiens ribosomal protein L13a pseudogene 17 (RPL13AP17), non-coding RNA [NR_003680]	ribosomal protein L13a pseudogene 17	GCCCTTGCTCCTTCCCTGTATTTTGTGACCAGAATGAAATAAATTACTTTCAAAGAAAAA
	A_23_P354908	NMNAT2	8.75718e-20	1.34479e-21	5.65744	up	4.56735	up	3.33838	up	Homo sapiens nicotinamide nucleotide adenylyltransferase 2 (NMNAT2), transcript variant 1, mRNA [NM_015039]	nicotinamide nucleotide adenylyltransferase 2	ACACCTTAGGAATAGCATTGTAGTAATGGTGATGAATATGCTCTGCCAAATTCATCCAGT
	A_21_P0003330	LOC728175	9.16808e-20	1.4097e-21	4.66032	up	7.69772	up	7.64447	up	Homo sapiens uncharacterized LOC728175 (LOC728175), long non-coding RNA [NR_040108]	uncharacterized LOC728175	AGGGACTTTTCAAACTGGAGAATTAGTGTGCTGAGCACAAAGTGGTGAGTATTTTGAGAG
	A_23_P259506	CYSTM1	9.33117e-20	1.43661e-21	3.50308	up	4.50369	up	3.35615	up	Homo sapiens cysteine-rich transmembrane module containing 1 (CYSTM1), mRNA [NM_032412]	cysteine-rich transmembrane module containing 1	TGGGATTCTAGATTAATGGGGGTTGCTACTGTTTAATTCAGTGACTTGATCTTTTTAATG
	A_33_P3378915	ARHGEF18	9.7012e-20	1.49549e-21	-3.30691	down	-2.59396	down	-2.75831	down	Homo sapiens Rho/Rac guanine nucleotide exchange factor (GEF) 18 (ARHGEF18), transcript variant 2, mRNA [NM_001130955]	Rho/Rac guanine nucleotide exchange factor (GEF) 18	ATCCACTTCCCAAACAGAGCCCCACGCAGGTTCACCATGAACCTCAGGGTCAGGGAATGA
	A_23_P254801	PLCG1	9.73627e-20	1.50282e-21	-3.65592	down	-3.40452	down	-3.02573	down	Homo sapiens phospholipase C, gamma 1 (PLCG1), transcript variant 1, mRNA [NM_002660]	phospholipase C, gamma 1	CTGGGCCAGGGAAACAAAGTTTACATTGTCCTGTAGCTTTAAAACCACAGCGGGCAGGGT
	A_23_P91390	THBD	9.88398e-20	1.52757e-21	3.64257	up	2.77859	up	2.51202	up	Homo sapiens thrombomodulin (THBD), mRNA [NM_000361]	thrombomodulin	ACAGGGTCTGCAAGGTCTTTGGTTCAGCTAAGCTAGGAATGAAATCCTGCTTCAGTGTAT
	A_33_P3400763	PLIN4	9.97848e-20	1.54414e-21	13.0146	up	10.0912	up	9.64983	up	Homo sapiens perilipin 4 (PLIN4), mRNA [NM_001080400]	perilipin 4	CCACTGCACCAGCAATGCTAGAAAACCAAGCCAATAAAAGTGATTTCTTTTTTCATTAAA
	A_21_P0009001	lnc-CLDN6-1	1.0406e-19	1.61234e-21	5.1413	up	4.76429	up	5.82044	up	LNCipedia lincRNA (lnc-CLDN6-1), lincRNA [lnc-CLDN6-1:1]	lnc-CLDN6-1:1	TTATTCTCTTCTGGTGCCAGTAAGAACTTTATCAAGGTACTAGTGCCATCAGCTCCTGCC
	A_23_P211445	LIMK2	1.04127e-19	1.61544e-21	5.02048	up	4.53887	up	4.12583	up	Homo sapiens LIM domain kinase 2 (LIMK2), transcript variant 2b, mRNA [NM_016733]	LIM domain kinase 2	TGCCTCTTCTAAGTGTCTATGAGCTTGCACCATATTTAATAAATTGGGAATGGGTTTGGG
	A_23_P106042	CMTM5	1.04177e-19	1.61827e-21	-1.0471	down	2.95907	up	2.84376	up	Homo sapiens CKLF-like MARVEL transmembrane domain containing 5 (CMTM5), transcript variant 3, mRNA [NM_001037288]	CKLF-like MARVEL transmembrane domain containing 5	TGAGACGTCACTGGGGACTTATCTGTGGAGCCTGGTGCTCCAGGATGTGGCTTCTCATGA
	A_24_P329487	FAM84B	1.05893e-19	1.64702e-21	-4.52106	down	-5.22023	down	-5.19634	down	Homo sapiens family with sequence similarity 84, member B (FAM84B), mRNA [NM_174911]	family with sequence similarity 84, member B	GTATAAACTTTATTTTTGTTGAAGGTTGTATGTTAAATCAATGTTACATTCTTATATCAC
	A_24_P202329	LOC146880	1.06707e-19	1.66177e-21	3.21438	up	3.07108	up	3.21054	up	Homo sapiens Rho GTPase activating protein 27 pseudogene (LOC146880), transcript variant 2, non-coding RNA [NR_026899]	Rho GTPase activating protein 27 pseudogene	TATGGGTGACAGCACTCCTGAGCGTCGCTGTCCCTATTCGCTGCCGTTGCCAGCTCCGAT
	A_23_P35916	ATM	1.07957e-19	1.68337e-21	-2.54635	down	-2.46736	down	-2.42668	down	Homo sapiens ATM serine/threonine kinase (ATM), mRNA [NM_000051]	ATM serine/threonine kinase	ACGTGTCTTAATGAGACTACAAGAGAAACTGAAAGGAGTGGAAGAAGGCACTGTGCTCAG
	A_19_P00318422	lnc-C9orf50-2	1.14243e-19	1.78588e-21	4.49059	up	2.88381	up	3.49821	up	LNCipedia lincRNA (lnc-C9orf50-2), lincRNA [lnc-C9orf50-2:1]	lnc-C9orf50-2:1	TGTTGCTCCTACTTGCTTCCAAAGGCAGTTCAGTGTCTGGCCCCACTGTCTTTCCAGGGT
	A_24_P346126	SERF1A	1.14243e-19	1.78398e-21	-1.98258	down	-2.4406	down	-2.42336	down	Homo sapiens small EDRK-rich factor 1A (telomeric) (SERF1A), transcript variant 2, mRNA [NM_022968]	small EDRK-rich factor 1A (telomeric)	CGATGTTTTAGAAGCAGTCTTCAAAGAATAAAACACTAACCATGCATGTGACATATTGGT
	A_33_P3216267		1.22002e-19	1.90959e-21	4.42268	up	3.39439	up	3.12559	up	capicua transcriptional repressor pseudogene 4 [Source:HGNC Symbol;Acc:HGNC:37753] [ENST00000447359]		AAGATGTTCCAGCTGCAGTCCAAAGCCCAACACCCCCAAGTGTGCCATGTGTGATGCGGA
	A_33_P3839334		1.25177e-19	1.96175e-21	2.6765	up	2.17174	up	2.20165	up	Homo sapiens cDNA FLJ31377 fis, clone NESOP1000087. [AK055939]		TGCCATCCTGTATTAAACAATGTATGGACAGAGTGGAACAACAGCAAAGCAAAAAATAAA
	A_23_P72961	PRPS1	1.27042e-19	1.99349e-21	-2.31105	down	-2.3789	down	-2.57047	down	Homo sapiens phosphoribosyl pyrophosphate synthetase 1 (PRPS1), transcript variant 1, mRNA [NM_002764]	phosphoribosyl pyrophosphate synthetase 1	AGATTAACTGCTGGACCTCCTACCTGCATTATCTCATTCTGGCTTCCTTGATAATTCTGT
	A_23_P208493	LILRB2	1.27489e-19	2.00301e-21	2.62258	up	2.78752	up	2.19983	up	Homo sapiens leukocyte immunoglobulin-like receptor, subfamily B (with TM and ITIM domains), member 2 (LILRB2), transcript variant 1, mRNA [NM_005874]	leukocyte immunoglobulin-like receptor, subfamily B (with TM and ITIM domains), member 2	ACTTGATTCTGCAGTCGAAATAACTAATATCCCTACATTTTTTAATTAAAGCAACAGACT
	A_33_P3357397		1.27664e-19	2.00827e-21	-3.82611	down	-5.46738	down	-5.32315	down	T cell receptor beta variable 29-1 [Source:HGNC Symbol;Acc:HGNC:12210] [ENST00000422143]		AACATTCTCAACTCTGACTGTGAGCAACATGAGCCCTGAAGACAGCAGCATATATCTCTG
	A_33_P3321293	IQGAP3	1.30679e-19	2.05828e-21	2.71184	up	5.84288	up	3.73062	up	Homo sapiens IQ motif containing GTPase activating protein 3 (IQGAP3), mRNA [NM_178229]	IQ motif containing GTPase activating protein 3	ATCTACCCAACTTCCTGTACTGTTGCCCTTCTGATGTTAATAAAAGCAGCTGTTACTCCC
	A_33_P3338335	MIDN	1.3103e-19	2.06639e-21	3.60912	up	2.23815	up	2.27492	up	Homo sapiens midnolin (MIDN), mRNA [NM_177401]	midnolin	TTTTAACGATTTTTAAATAACGTCTGTGCCTCCACTGGTTGAGGGTGGAACCTCCAGGCA
	A_32_P221822	RRP15	1.3319e-19	2.10308e-21	-2.92903	down	-3.291	down	-3.56339	down	Homo sapiens ribosomal RNA processing 15 homolog (S. cerevisiae) (RRP15), mRNA [NM_016052]	ribosomal RNA processing 15 homolog (S. cerevisiae)	GTTCTAGAATCCAAACTCTACATACTGTTTAATAGAGCATTATTGATATTAGCTGTATTA
	A_24_P59053		1.34648e-19	2.12875e-21	-4.46391	down	-4.74184	down	-4.48609	down	T cell receptor beta variable 3-1 [Source:HGNC Symbol;Acc:HGNC:12212] [ENST00000390387]		GTTTAGCTACAATAATAAGGAGCTCATTATAAATGAAACAGTTCCAAATCGCTTCTCACC
	A_23_P93105	GABRR2	1.41081e-19	2.23544e-21	3.01364	up	5.8338	up	6.72964	up	Homo sapiens gamma-aminobutyric acid (GABA) A receptor, rho 2 (GABRR2), mRNA [NM_002043]	gamma-aminobutyric acid (GABA) A receptor, rho 2	AGCGCAAGGAACGGAAGCTGCGGGAGAAGTTCCCGTGCATGTGTGGAATGCTTCACTCAA
	A_33_P3861706	MTMR10	1.41081e-19	2.23602e-21	2.4151	up	1.89731	up	1.87272	up	Homo sapiens myotubularin related protein 10 (MTMR10), mRNA [NM_017762]	myotubularin related protein 10	GGATGAGCAAGAAGATGTGTTATCTTGTTGTTCAACAGTATTGAGTGTGAAGGAAATTTT
	A_23_P205529	METTL17	1.41671e-19	2.24817e-21	-2.01965	down	-1.66381	down	-1.80025	down	Homo sapiens methyltransferase like 17 (METTL17), transcript variant 2, mRNA [NM_022734]	methyltransferase like 17	GTACCATCCCATCCCCTTCAGCTGGAACAAGAAACCAAAGGAAGAAAAGTTCTCTATGGT
	A_32_P146659	ATP6V0E2-AS1	1.43044e-19	2.27277e-21	-4.09115	down	-4.8317	down	-4.42589	down	Homo sapiens ATP6V0E2 antisense RNA 1 (ATP6V0E2-AS1), long non-coding RNA [NR_027040]	ATP6V0E2 antisense RNA 1	AGGTCTGATGCAGTAGCTTTTACTATTGGTGGAAATCGATGTTTTTTCCTTGAAAGTCTA
	A_33_P3346826	IL32	1.45817e-19	2.31971e-21	-4.97255	down	-3.63893	down	-3.30813	down	Homo sapiens interleukin 32 (IL32), transcript variant 4, mRNA [NM_001012633]	interleukin 32	AGAAAGAGATGGATTACGGTGCCGAGGCAACAGATCCCCTGTCCCGGATGTTGAGGATCC
	A_21_P0001238	lnc-EGLN1-1	1.47163e-19	2.34402e-21	2.29248	up	2.75732	up	2.61669	up	LNCipedia lincRNA (lnc-EGLN1-1), lincRNA [lnc-EGLN1-1:6]	lnc-EGLN1-1:6	AGTAACTTGGCTAGAATATGGCAGTAACTACAAGGCATGTTCTGCTCTGGCACGAAGACA
	A_23_P211806	LRRFIP2	1.47458e-19	2.35163e-21	2.57273	up	2.41322	up	2.21241	up	Homo sapiens leucine rich repeat (in FLII) interacting protein 2 (LRRFIP2), transcript variant 2, mRNA [NM_017724]	leucine rich repeat (in FLII) interacting protein 2	AAACAAGTTCTCGGGTGGGGAATCTATGTTTCACTCAGATTTATATGTTTGGAGGAAAAA
	A_23_P71300	CCDC25	1.48462e-19	2.37056e-21	-2.37751	down	-2.78397	down	-2.80576	down	Homo sapiens coiled-coil domain containing 25 (CCDC25), mRNA [NM_018246]	coiled-coil domain containing 25	AATGATCATATTAGAGTGACTGAGTGACCTTTTGATTTTGAAGCAGACTAAAATCTGACC
	A_32_P41604	F5	1.49536e-19	2.39066e-21	3.68292	up	2.3754	up	2.31695	up	Homo sapiens coagulation factor V (proaccelerin, labile factor) (F5), mRNA [NM_000130]	coagulation factor V (proaccelerin, labile factor)	GATCTGGAAAATACTTGTTTGGGGATCAATAATATGTTTGGGCTATTATCTAATGCTGTG
	A_23_P31376	LRRN3	1.51421e-19	2.42379e-21	-7.28015	down	-8.76901	down	-7.06018	down	Homo sapiens leucine rich repeat neuronal 3 (LRRN3), transcript variant 3, mRNA [NM_018334]	leucine rich repeat neuronal 3	GCCTCTCTCCAGAAATGAACTGTGATGGTGGACACAGCTATGTGAGGAATTACTTACAGA
	A_33_P3396379		1.52255e-19	2.44014e-21	7.81325	up	3.46997	up	4.85492	up			TCTGCACACACACGTGTTCACATGCACCCGTCTCTGCAAACACGTGTGGAGTCACGCACA
	A_23_P29096	PDE9A	1.54006e-19	2.47124e-21	-3.39343	down	-5.19771	down	-4.30171	down	Homo sapiens phosphodiesterase 9A (PDE9A), transcript variant 1, mRNA [NM_002606]	phosphodiesterase 9A	AGGTCCGTCCAATGGAAGTCGCAGAGCCTTGGGTGGACTGTTTATTAGAGGAATATTTTA
	A_33_P3278911	PHF20L1	1.55686e-19	2.50126e-21	3.89672	up	2.93369	up	3.24174	up	PHD finger protein 20-like 1 [Source:HGNC Symbol;Acc:HGNC:24280] [ENST00000486199]	PHD finger protein 20-like 1	CTGCTAATGAAGATCCCCTCTTATAGTCCAATAAGCTTATCAGGACTTCCAGAGTCATGA
	A_21_P0008999	lnc-LMF1-1	1.6032e-19	2.57888e-21	-2.64124	down	-3.65173	down	-3.27557	down	LNCipedia lincRNA (lnc-LMF1-1), lincRNA [lnc-LMF1-1:1]	lnc-LMF1-1:1	CTTGTCAGTTCCTTGCCCTGCCATTTTCTGTCTAATTAATTCTTTTATTGTGCACCGGAT
	A_23_P385861	CDCA2	1.61064e-19	2.59402e-21	1.30303	up	4.09471	up	2.75408	up	Homo sapiens cell division cycle associated 2 (CDCA2), mRNA [NM_152562]	cell division cycle associated 2	TGACATTTCCTGCAGAGTCTGTAGCAAGAGGGAAAGTAACCATCTATGCTGAAATGATCT
	A_23_P305198	STAT4	1.61089e-19	2.59759e-21	-5.38875	down	-4.5664	down	-3.61001	down	Homo sapiens signal transducer and activator of transcription 4 (STAT4), transcript variant 1, mRNA [NM_003151]	signal transducer and activator of transcription 4	CAAAACTTGTTAATACAACTGGATGAACAGTTAGGTCGTGTTTCCAAAGAGAAAAACCTA
	A_24_P166443	HLA-DPB1	1.62886e-19	2.62978e-21	-1.48776	down	-2.94382	down	-2.85367	down	Homo sapiens major histocompatibility complex, class II, DP beta 1 (HLA-DPB1), mRNA [NM_002121]	major histocompatibility complex, class II, DP beta 1	CTGGATAGTCCTGTCACCGTGGAGTGGAAGGCACAGTCTGATTCTGCCCGGAGTAAGACA
	A_33_P3358307	OTUD7B	1.66374e-19	2.68937e-21	-3.88671	down	-3.01383	down	-2.76139	down	Homo sapiens OTU deubiquitinase 7B (OTUD7B), mRNA [NM_020205]	OTU deubiquitinase 7B	CCTATGCTGCATTTATTGAAAGTTACAAGATTTAACCAGAAGTTTTTCCTCCATACTGGT
	A_33_P3330443	FAM110B	1.69008e-19	2.73528e-21	5.97998	up	5.71625	up	5.08335	up	Homo sapiens family with sequence similarity 110, member B (FAM110B), mRNA [NM_147189]	family with sequence similarity 110, member B	CTGTTTTGGAATGCAGCTATGAGTGGGGGTGATACAATGTGTTCAATATAATAGAATAAA
	A_24_P317827	TMEM8B	1.69333e-19	2.74388e-21	-1.39111	down	-2.58584	down	-2.23731	down	Homo sapiens transmembrane protein 8B (TMEM8B), transcript variant 1, mRNA [NM_001042590]	transmembrane protein 8B	AGCCTTCCCAAGACATGGATTCCTTCCCAGGGAGACAAAGCCCTGTCAGGAGCACAGCAT
	A_33_P3249595	BCL11A	1.69759e-19	2.75413e-21	-3.23327	down	-2.91155	down	-3.131	down	Homo sapiens B-cell CLL/lymphoma 11A (zinc finger protein) (BCL11A), transcript variant 3, mRNA [NM_138559]	B-cell CLL/lymphoma 11A (zinc finger protein)	GATGACGATTGTTTATCAACGTCATCTAGAGGAATTTGCCCCAAACAGGAACACATAGCA
	A_24_P303524	MICALL2	1.70033e-19	2.76193e-21	3.63167	up	2.71722	up	2.61284	up	Homo sapiens MICAL-like 2 (MICALL2), mRNA [NM_182924]	MICAL-like 2	CCTACAAGGGGCATGTGGACAGCAGGGACCTGCGCTACCGTCTGTGGTCTCAATAAAGAA
	A_24_P365975	COL8A2	1.71726e-19	2.79282e-21	4.52591	up	2.38311	up	2.0242	up	Homo sapiens collagen, type VIII, alpha 2 (COL8A2), transcript variant 1, mRNA [NM_005202]	collagen, type VIII, alpha 2	GAAAATGGAACTTCTTTTTGAAAAGACAAGCAACCATGTTAACTGTATTGACACATCCTC
	A_33_P3399045		1.74089e-19	2.83468e-21	-3.84208	down	-3.13437	down	-3.38864	down	Homo sapiens cDNA clone IMAGE:5242641. [BC032569]		CACTGAACAGAATCTGAGATTTAATAAGCCAAATCAACAATGTGGGAAGTTCGTTTTGTT
	A_33_P3317850	RIOK3	1.74406e-19	2.84327e-21	3.79348	up	2.93122	up	2.55333	up	Homo sapiens RIO kinase 3 (RIOK3), mRNA [NM_003831]	RIO kinase 3	GTGTGGCATTCTTGGAGTGTGCTGTGAATGTGCTTTTTAAGAAATTAAAAAGAGATCATT
	A_19_P00316185	LOC101927686	1.74571e-19	2.84941e-21	7.63913	up	4.25221	up	3.941	up	PREDICTED: Homo sapiens uncharacterized LOC101927686 (LOC101927686), transcript variant X8, ncRNA [XR_426095]	uncharacterized LOC101927686	GTCTCTGCTGTACTTTCCCTGCCTCTACCTCACTTAGTAAAGAAATCATCTTTGCTTGAT
	A_24_P71938	SMAD1	1.748e-19	2.8566e-21	4.04246	up	4.09148	up	2.9917	up	Homo sapiens SMAD family member 1 (SMAD1), transcript variant 1, mRNA [NM_005900]	SMAD family member 1	TGTATTCACTTATGCTCTCGTACATTGAGTACTTTTATTCCAAAACTAGTGGGTTTTCTC
	A_21_P0012781		1.75612e-19	2.87332e-21	1.63125	up	3.06875	up	1.98872	up			GAGAAGAGGAACCGTAGCTGCTCAAACGTTCATGTGAAAGAAGAATAAACTATCAGATTT
	A_23_P28857	SIRPG	1.77971e-19	2.91543e-21	-2.3701	down	-2.62923	down	-2.26614	down	Homo sapiens signal-regulatory protein gamma (SIRPG), transcript variant 1, mRNA [NM_018556]	signal-regulatory protein gamma	TCCCATCCATCGCCTTGAGACTGACCGTAAACCACAGACGCTCTCCAGGTTCTCAAGAGT
	A_33_P3751889	TOM1	1.78305e-19	2.92441e-21	2.94838	up	2.2587	up	2.23135	up	Homo sapiens target of myb1 (chicken) (TOM1), transcript variant 2, mRNA [NM_001135732]	target of myb1 (chicken)	GCTCACCTCTTGGTTGATCCTCTTGTACTGGGAGAGGTGCCTTTTGTATCCCCAATTAAA
	A_23_P143559	CLTCL1	1.78934e-19	2.93826e-21	3.11472	up	2.89508	up	3.15219	up	Homo sapiens clathrin, heavy chain-like 1 (CLTCL1), transcript variant 1, mRNA [NM_007098]	clathrin, heavy chain-like 1	CATGTCACTCCAGCAGCACAGGGGACGCAATGGGAGGCAGGGACACCTGGACAATATTTA
	A_32_P226786	FAM126B	1.84976e-19	3.04112e-21	4.21773	up	3.36716	up	3.73611	up	Homo sapiens family with sequence similarity 126, member B (FAM126B), mRNA [NM_173822]	family with sequence similarity 126, member B	TTATTGGTGCATGTAAGCCATTATCCTGTCTTAATGAACCGATTAATGCTGTTGATTGTT
	A_32_P147078	SLC8A1	1.89232e-19	3.11482e-21	4.62259	up	3.2486	up	3.17993	up	Homo sapiens solute carrier family 8 (sodium/calcium exchanger), member 1 (SLC8A1), transcript variant A, mRNA [NM_021097]	solute carrier family 8 (sodium/calcium exchanger), member 1	GGGGGGCGGGAAATGCACTAATTGTGCTCTTCCTTATAAATGGTACATATTACTGACACA
	A_33_P3326992	PDE4DIP	1.96174e-19	3.23295e-21	-2.51452	down	-2.999	down	-2.96272	down	Homo sapiens phosphodiesterase 4D interacting protein (PDE4DIP), transcript variant 1, mRNA [NM_014644]	phosphodiesterase 4D interacting protein	TCCCAGATACCATTTCAGGCTTAACCTAGCACATCCTATTTCTTTTCTTCTATGATATCC
	A_23_P65789	MCTP2	1.96372e-19	3.24009e-21	5.6261	up	5.17607	up	4.74154	up	Homo sapiens multiple C2 domains, transmembrane 2 (MCTP2), transcript variant 1, mRNA [NM_018349]	multiple C2 domains, transmembrane 2	TTATAATCATTTCATTTGCCTGAATGTTTTAAGCAGGAAGTAGAAATACTTTGGCTGCCC
	A_24_P256037		1.97853e-19	3.26844e-21	-1.84154	down	-2.22982	down	-2.29674	down	ribosomal protein S16 pseudogene 8 [Source:HGNC Symbol;Acc:HGNC:35608] [ENST00000479473]		AAAGCCCTGGTGGCCTGTTACCAGAAATACGTGGCTTCCAAGAAGGTCAAAGACGTCCTC
	A_33_P3384108	SLC19A1	1.98482e-19	3.28273e-21	3.30812	up	2.15712	up	2.43701	up	Homo sapiens solute carrier family 19 (folate transporter), member 1 (SLC19A1), transcript variant 1, mRNA [NM_194255]	solute carrier family 19 (folate transporter), member 1	CTGAGCTGTGACATTGCTGGTCATCCTTGGTGCTCTTGCTTTTTTGAAAGATGCTTTTTT
	A_23_P153745	IFI30	2.03147e-19	3.3639e-21	2.44954	up	1.72878	up	1.48798	up	Homo sapiens interferon, gamma-inducible protein 30 (IFI30), mRNA [NM_006332]	interferon, gamma-inducible protein 30	ATGAAGCCCAGATACACAAAATTCCACCCCTAGATCAAGAATCCTGCTCCACTAAGAATG
	A_21_P0001239	lnc-EGLN1-1	2.10544e-19	3.49052e-21	2.24186	up	2.73223	up	2.57355	up	LNCipedia lincRNA (lnc-EGLN1-1), lincRNA [lnc-EGLN1-1:6]	lnc-EGLN1-1:6	GTAACTTGGCTAGAATATGGCAGTAACTACAAGGCATGTTCTGCTCTGGCACGAAGACAA
	A_23_P103361	LCK	2.13021e-19	3.5358e-21	-3.61486	down	-3.88412	down	-3.5538	down	Homo sapiens LCK proto-oncogene, Src family tyrosine kinase (LCK), transcript variant 2, mRNA [NM_005356]	LCK proto-oncogene, Src family tyrosine kinase	CCCACCCACATGTGACACATATGCACCTTGTGTCTGTACACGTGTCCTGTAGTTGCGTGG
	A_32_P210642	EGFL7	2.14734e-19	3.56846e-21	3.49387	up	4.97294	up	4.11127	up	Homo sapiens EGF-like-domain, multiple 7 (EGFL7), transcript variant 2, mRNA [NM_201446]	EGF-like-domain, multiple 7	AAGGCCAGGTGGGCCCTCAGCTGAGGGAAGGTACGAGCTCCCTGCTGGAGCCTGGGACCC
	A_21_P0014607		2.25174e-19	3.75082e-21	7.31785	up	4.38172	up	4.88539	up			ACAAAACTTGTTATCCTCCTCCAGCAGCAGGTTGGCCAGGACAGCCTGGTACCGATCCAC
	A_33_P3360540	AGPAT2	2.25174e-19	3.74935e-21	4.98089	up	3.1081	up	2.80247	up	Homo sapiens 1-acylglycerol-3-phosphate O-acyltransferase 2 (AGPAT2), transcript variant 1, mRNA [NM_006412]	1-acylglycerol-3-phosphate O-acyltransferase 2	CTGCTCCTGCTGGCCTGGAAGACTCTGTGGGGTCAGCACTGTACTCCGTTGCTGTTTTTT
	A_33_P3228285	ANKRD13D	2.28509e-19	3.81089e-21	3.07776	up	2.18769	up	2.48437	up	Homo sapiens ankyrin repeat domain 13 family, member D (ANKRD13D), transcript variant 1, mRNA [NM_207354]	ankyrin repeat domain 13 family, member D	AATTTATTTATTTATAAACTCTCTGCTGCTGAGCTTGGGGCCTGGAGCCCCAGGAATGAG
	A_23_P118042	LRRC36	2.30107e-19	3.84206e-21	-2.1074	down	-4.38464	down	-3.94414	down	Homo sapiens leucine rich repeat containing 36 (LRRC36), transcript variant 1, mRNA [NM_018296]	leucine rich repeat containing 36	AGGCTCTCACCGCCATTGCCACCAGTATGGTGGTATGTACTCACAAAGATTAAGAAAGAA
	A_23_P81973	HSD17B8	2.41411e-19	4.03557e-21	-2.14931	down	-2.21709	down	-2.42623	down	Homo sapiens hydroxysteroid (17-beta) dehydrogenase 8 (HSD17B8), mRNA [NM_014234]	hydroxysteroid (17-beta) dehydrogenase 8	AGCTTGGACGACATGGGATCCGCTGTAACTCTGTCCTCCCAGGGTTCATTGCAACACCCA
	A_23_P57199	GGTLC1	2.48725e-19	4.16764e-21	4.94428	up	3.9243	up	3.23386	up	Homo sapiens gamma-glutamyltransferase light chain 1 (GGTLC1), transcript variant A, mRNA [NM_178311]	gamma-glutamyltransferase light chain 1	GACGAGGAAGAGGACTTTGGGGGACAGGCTTCTCCTGTGAGCAGCAGAGCAGCACAATAA
	A_21_P0013820	XLOC_l2_015762	2.48725e-19	4.16282e-21	-2.04919	down	-2.12041	down	-2.17021	down	BROAD Institute lincRNA (XLOC_l2_015762), lincRNA [TCONS_l2_00030539]		GTCACCTTCCTCTGCCTTTGTTCACCGTGAGTTCTGATGTCTTAGTGACTTAGTTCAAAG
	A_23_P3221	SQRDL	2.49318e-19	4.1825e-21	3.73264	up	2.55278	up	2.33432	up	Homo sapiens sulfide quinone reductase-like (yeast) (SQRDL), transcript variant 1, mRNA [NM_021199]	sulfide quinone reductase-like (yeast)	TCCCTTTTCAGTACCTTTGAACAGCAACCATGTGGGCTACTCATGATGGGCTTGATTCTT
	A_23_P161458	OLAH	2.52793e-19	4.25034e-21	8.07402	up	25.4773	up	23.5621	up	Homo sapiens oleoyl-ACP hydrolase (OLAH), transcript variant 2, mRNA [NM_001039702]	oleoyl-ACP hydrolase	GGATCTGAAGACATAGCAAAGGACATGGAAGCCTGGAAAGATGTAACCAGTGGAAATGCT
	A_24_P333733	ATP6V0A1	2.52793e-19	4.25076e-21	2.29478	up	2.33733	up	2.4141	up	Homo sapiens ATPase, H+ transporting, lysosomal V0 subunit a1 (ATP6V0A1), transcript variant 3, mRNA [NM_005177]	ATPase, H+ transporting, lysosomal V0 subunit a1	GTTTTCGTGATGATCTTTGCTCTGTTTCCAGTGGGGTTTGAAGCAGAGTTCAGGGAACCC
	A_24_P185186	SAMD14	2.53347e-19	4.26507e-21	1.81697	up	4.53147	up	4.5177	up	Homo sapiens sterile alpha motif domain containing 14 (SAMD14), transcript variant 1, mRNA [NM_174920]	sterile alpha motif domain containing 14	AAGCAAACTAAAGAGCCTGGGGCTCAGCAACTCTCATGACCGGGCACTGGTGAAGCGCAA
	A_24_P341731		2.56929e-19	4.33044e-21	-4.27307	down	-3.12609	down	-2.92311	down			GGCACAATCTTCTTTGGCATCTTTAAGGCGTTTGACAAGCATGTGAATTTGATCCTCTGC
	A_19_P00322544	lnc-C9orf50-2	2.61712e-19	4.41621e-21	3.99298	up	2.28452	up	2.59417	up	ALU1_HUMAN (P39188) Alu subfamily J sequence contamination warning entry, partial (6%) [THC2579385]	lnc-C9orf50-2:1	ATTTTGGCAAGTCTGGAGAATTGAAGGCCCAGGCCCTTGGCCCTATCACCGCAATGCAGG
	A_33_P3405763	TMPPE	2.62629e-19	4.43686e-21	2.20409	up	1.7403	up	1.59782	up	Homo sapiens transmembrane protein with metallophosphoesterase domain (TMPPE), transcript variant 1, mRNA [NM_001039770]	transmembrane protein with metallophosphoesterase domain	TCTGTAGTATATGATGCTGTCACAAAATCTCAATAAATTGATCCTGCTGCCATTCCTTCC
	A_24_P53215	UNC13D	2.69885e-19	4.56477e-21	3.27295	up	2.77984	up	2.98687	up	Homo sapiens unc-13 homolog D (C. elegans) (UNC13D), mRNA [NM_199242]	unc-13 homolog D (C. elegans)	TACAGGCACAGAGTCTCCTGGAAAAGGGAGAGGGGACCCTGCCAAAGATGAGGCTCCAGC
	A_32_P195065	SEMA4F	2.70805e-19	4.58566e-21	-3.43007	down	-3.10369	down	-2.86346	down	Homo sapiens sema domain, immunoglobulin domain (Ig), transmembrane domain (TM) and short cytoplasmic domain, (semaphorin) 4F (SEMA4F), transcript variant 1, mRNA [NM_004263]	sema domain, immunoglobulin domain (Ig), transmembrane domain (TM) and short cytoplasmic domain, (semaphorin) 4F	AGGTTTTATGGCTTTTGTCAGATTTTCAAGGCCTTAACAAAGTTAAAGGACCACTGCCCT
	A_24_P347624	SNURF	2.71503e-19	4.60283e-21	-4.70908	down	-3.29563	down	-3.07288	down	Homo sapiens SNRPN upstream reading frame (SNURF), transcript variant 2, mRNA [NM_022804]	SNRPN upstream reading frame	GCTTACACCTGAGACGAACTACAGAACAGCACGTACCAGAGGTGGAAGTCCAAGTCAAAC
	A_33_P3319161	FXN	2.72491e-19	4.62496e-21	-2.3469	down	-2.20795	down	-2.17331	down	Homo sapiens frataxin (FXN), transcript variant 2, mRNA [NM_181425]	frataxin	GTGATCAACAAGCAGACGCCAAACAAGCAAATCTGGCTATCTTCTCCATCCAGGTATGTA
	A_23_P21363	AHNAK	2.79185e-19	4.74407e-21	3.39814	up	1.46684	up	1.46597	up	Homo sapiens AHNAK nucleoprotein (AHNAK), transcript variant 2, mRNA [NM_024060]	AHNAK nucleoprotein	GTGCATTTCTTTACTTGCAAGGGGACAGAGTGTGGGCTTAGGTTTGGGACTAGAGGGGGC
	A_21_P0014863	PPP2R5C	2.84137e-19	4.83382e-21	-2.47352	down	-2.14057	down	-1.91618	down	Homo sapiens cDNA clone IMAGE:6163196, partial cds. [BC051442]	protein phosphatase 2, regulatory subunit B', gamma	AAATGAGTCATTCTGTTATTTTGGAAACTTATGTCTCATGCCAGGATCTGCAGATAGTTC
	A_23_P146849	APBA2	2.87539e-19	4.89737e-21	-4.72589	down	-5.38266	down	-4.88006	down	Homo sapiens amyloid beta (A4) precursor protein-binding, family A, member 2 (APBA2), transcript variant 1, mRNA [NM_005503]	amyloid beta (A4) precursor protein-binding, family A, member 2	TTGGACTTTTATTTTGGCAGGCTTTTTTCCAGACTCTAGGGTTTTCCAATGTGACTAATG
	A_21_P0008333	lnc-ABHD12B-4	2.87849e-19	4.90833e-21	3.16445	up	2.9072	up	3.05167	up	LNCipedia lincRNA (lnc-ABHD12B-4), lincRNA [lnc-ABHD12B-4:1]	lnc-ABHD12B-4:1	AAGAGATGAGCATTAGAGTTTGGATCCGGATGGGGCCAGAAATACCCTGAATTAAGAGTG
	A_33_P3232011	RAB17	2.91835e-19	4.98203e-21	13.1837	up	9.79387	up	6.514	up	Homo sapiens RAB17, member RAS oncogene family (RAB17), transcript variant 1, mRNA [NM_022449]	RAB17, member RAS oncogene family	GCCTGAGATATAAGTTGTACTGCGTATGCAGTTTTTCCTCCAAAAATTAAATTGCTTTTG
	A_33_P3340060	RPL13A	2.92832e-19	5.00483e-21	-4.31053	down	-3.56475	down	-3.69852	down	Homo sapiens ribosomal protein L13a (RPL13A), transcript variant 1, mRNA [NM_012423]	ribosomal protein L13a	TCAACATTTCTGGCAATTTCTACAGAAACAAGTTGAAGTACCTGGCTTTCCCCCGCAAGC
	A_21_P0008982		2.94303e-19	5.03578e-21	3.91187	up	4.44079	up	4.53839	up			TTTCAGAAGGGCCACCCGGCTCACGGTTCTCTTTATTCAGGCAAAGCCATCAAGACCCCG
	A_23_P144959	VCAN	2.96134e-19	5.07295e-21	3.37193	up	2.23887	up	2.15693	up	Homo sapiens versican (VCAN), transcript variant 1, mRNA [NM_004385]	versican	ACTTCCTGTGCCTTTCCTATCACCTCGAGAAGTAATTATCAGTTGGTTTGGATTTTTGGA
	A_33_P3253214		3.15813e-19	5.41628e-21	2.61135	up	2.6164	up	2.95361	up	histone cluster 2, H2aa4 [Source:HGNC Symbol;Acc:HGNC:29668] [ENST00000607355]		AACTCAAAAGGCTCTTTTCAGAGCCACCCACGTTTTCAAATAAAAGAGTTGTTAATGCTG
	A_33_P3546070	PHF20L1	3.20436e-19	5.50188e-21	2.75777	up	2.51243	up	2.50139	up	Homo sapiens PHD finger protein 20-like 1 (PHF20L1), transcript variant 1, mRNA [NM_016018]	PHD finger protein 20-like 1	AGTATTCAGGCTCAACATACAGTTTGATCCTGAGTATGCTTGGTGTTTGCCTTCAAAAAA
	A_24_P465772	RPSAP52	3.20643e-19	5.51176e-21	-2.47633	down	-2.65826	down	-2.85344	down	Homo sapiens ribosomal protein SA pseudogene 52 (RPSAP52), non-coding RNA [NR_026825]	ribosomal protein SA pseudogene 52	CTTTATGCAACACAGATTCTCCTCTGTGCCATTGGACATTGCCATCACATGCAACAACAA
	A_23_P61398	PIM3	3.37795e-19	5.81326e-21	4.10521	up	2.52726	up	2.34188	up	Homo sapiens Pim-3 proto-oncogene, serine/threonine kinase (PIM3), mRNA [NM_001001852]	Pim-3 proto-oncogene, serine/threonine kinase	AGCCTGAGCGTTTAATTTATTCAGTACCTGTGTTTGTGTGAATGCGGTGTGTGCAGGCAT
	A_32_P231493	DOCK9-AS2	3.39891e-19	5.85604e-21	-2.54446	down	-4.31454	down	-4.29282	down	Homo sapiens DOCK9 antisense RNA 2 (head to head) (DOCK9-AS2), long non-coding RNA [NR_047482]	DOCK9 antisense RNA 2 (head to head)	CTCTTGTTACCTTGGCTCTCTAAGCTGTATCTACTTCTATACAAGGCGAACAATTTTGTC
	A_24_P88763	LOXL3	3.41128e-19	5.88406e-21	1.86132	up	2.31668	up	2.01699	up	Homo sapiens lysyl oxidase-like 3 (LOXL3), transcript variant 1, mRNA [NM_032603]	lysyl oxidase-like 3	AGGAGGTCAGGATGGTCAGCTCCAGTATCTCCCCTAAGTTTAGGGGGATACAGCTTTACC
	A_24_P33552		3.41272e-19	5.89327e-21	-1.69771	down	-1.99902	down	-2.0907	down	ribosomal protein L23a pseudogene 46 [Source:HGNC Symbol;Acc:HGNC:35894] [ENST00000438548]		AGAAGAAGGCATACGTTCAACTGCCTCCTGATTACAATGCTTTGGATGTTGCCAACAAAA
	A_33_P3298785	CUX1	3.43005e-19	5.92997e-21	2.0646	up	2.22681	up	2.11585	up	Homo sapiens cut-like homeobox 1 (CUX1), transcript variant 4, mRNA [NM_001202543]	cut-like homeobox 1	ATCATCCACCGCCTGGAGAAGGCCGCCAGCCGGGAGGAACCTATCGAATGGGAGTTCTGA
	A_23_P30363	P4HA2	3.44411e-19	5.96107e-21	3.43088	up	3.87043	up	3.25754	up	Homo sapiens prolyl 4-hydroxylase, alpha polypeptide II (P4HA2), transcript variant 1, mRNA [NM_004199]	prolyl 4-hydroxylase, alpha polypeptide II	TTTATGGCATTTCTATCTATTGTGGCTTTACCAAAAAATAAAATGTCCCTACCAGAAGCC
	A_23_P3823	BCKDK	3.56091e-19	6.17025e-21	2.53404	up	1.79482	up	1.8015	up	Homo sapiens branched chain ketoacid dehydrogenase kinase (BCKDK), transcript variant 2, mRNA [NM_001122957]	branched chain ketoacid dehydrogenase kinase	CTGCTCCACACACTGCTGCATCTTGGGTCTCAGGGACCCAGACAGATGGACTTACATGGA
	A_23_P349771	HAUS5	3.58619e-19	6.22111e-21	-3.9546	down	-3.2424	down	-3.54053	down	Homo sapiens HAUS augmin-like complex, subunit 5 (HAUS5), mRNA [NM_015302]	HAUS augmin-like complex, subunit 5	GAAAAACATGCACAGATGGTAGTTTTACTGGTGTTGCAGTAAGTTTTCAAATTTGGAAGT
	A_21_P0003419	LOC100996286	3.59369e-19	6.24121e-21	-3.84633	down	-4.51323	down	-4.20237	down	Homo sapiens uncharacterized LOC100996286 (LOC100996286), transcript variant 1, long non-coding RNA [NR_121627]	uncharacterized LOC100996286	TCACTTACCCAGGGCAAGGTCCAGCCTGAGATTTGAGTTCCTACTGAGTCCCCTACAGGG
	A_33_P3399768	LINC01160	3.68896e-19	6.41393e-21	3.09329	up	3.07781	up	2.90105	up	Homo sapiens long intergenic non-protein coding RNA 1160 (LINC01160), long non-coding RNA [NR_034126]	long intergenic non-protein coding RNA 1160	CATGGAAGCTCTGTGCCCCTTTTTCACCCTATACACCTCATCATCTGTATGCTTGGTAAT
	A_33_P3298356	SH3GLB1	3.71201e-19	6.46133e-21	3.22791	up	2.2643	up	2.25827	up	Homo sapiens SH3-domain GRB2-like endophilin B1 (SH3GLB1), transcript variant 2, mRNA [NM_001206651]	SH3-domain GRB2-like endophilin B1	GCCTCAACTTAAAGCAGAACTGTTTTCTACTGGATTTTTCATTAACAGCAAGCTTTTTCT
	A_23_P40453	CBR3	3.76764e-19	6.5656e-21	-4.53423	down	-4.47987	down	-4.75558	down	Homo sapiens carbonyl reductase 3 (CBR3), mRNA [NM_001236]	carbonyl reductase 3	GTGGTGAATATCAGTAGTTTGCAGTGTTTAAGGGCTTTTGAAAACTGCAGTGAAGATCTG
	A_19_P00318831	HCG18	3.8061e-19	6.64011e-21	-3.34822	down	-2.72557	down	-2.6074	down	Homo sapiens HLA complex group 18 (non-protein coding) (HCG18), transcript variant 1, long non-coding RNA [NR_024052]	HLA complex group 18 (non-protein coding)	CAAAAGGACAGACTACCTTGTGGAACCTAGCATTGTTCTCCTTCTGCAGCACTAAGTAAC
	A_19_P00321303	LINC00963	3.82316e-19	6.67741e-21	2.45885	up	1.45182	up	1.85447	up	long intergenic non-protein coding RNA 963 [Source:HGNC Symbol;Acc:HGNC:48716] [ENST00000444184]	long intergenic non-protein coding RNA 963	CATTGCGGTGATAGGGCCAAGGGCCTGGGCCTTCAATTCTCCAGACTTGCCAAAATGCTC
	A_33_P3217480	HIRIP3	3.82451e-19	6.68732e-21	-2.24917	down	-1.82457	down	-2.09995	down	Homo sapiens HIRA interacting protein 3 (HIRIP3), transcript variant 1, mRNA [NM_003609]	HIRA interacting protein 3	CAGCTTCACGCTGTCCCTTTAAGGTGTTTATTTTTTAAGACTCAATAAAGGAGTGTTTTT
	A_33_P3415560	ZFP82	3.86777e-19	6.77059e-21	-2.96323	down	-2.47192	down	-2.70148	down	Homo sapiens ZFP82 zinc finger protein (ZFP82), mRNA [NM_133466]	ZFP82 zinc finger protein	GTAAGAAGGCCTTTAGGCAACATTCACACCTTACTCATCATCTGAAAATTCATAATGTAA
	A_32_P133072	SPON1	3.873e-19	6.78737e-21	-3.25622	down	-5.19246	down	-4.46657	down	Homo sapiens spondin 1, extracellular matrix protein (SPON1), mRNA [NM_006108]	spondin 1, extracellular matrix protein	ACCAGGTTAATGGCTAAGAATGGGTAACATGACTCTTGTTGGATTGTTATTTTTTGTTTG
	A_23_P21485	PID1	3.88373e-19	6.81383e-21	-1.18896	down	-3.174	down	-3.28656	down	Homo sapiens phosphotyrosine interaction domain containing 1 (PID1), transcript variant 1, mRNA [NM_017933]	phosphotyrosine interaction domain containing 1	TGCTCCTTCCTAAAAGTCTGTTTTCAATCCTGGTAATATTAGGGGCACTGCGGCACCTAA
	A_33_P3329176		3.91166e-19	6.87054e-21	-2.83308	down	-2.94422	down	-2.79245	down	T cell receptor alpha variable 13-1 [Source:HGNC Symbol;Acc:HGNC:12108] [ENST00000390436]		ATTGCTGTTACATTGAACAAGACAGCCAAACATTTCTCCCTGCACATCACAGAGACCCAA
	A_23_P38167	GPRC5C	3.95895e-19	6.9614e-21	3.34953	up	2.20931	up	2.46322	up	Homo sapiens G protein-coupled receptor, class C, group 5, member C (GPRC5C), transcript variant 1, mRNA [NM_022036]	G protein-coupled receptor, class C, group 5, member C	TCCAGCCAAATAGTGTTCTCGGGGTGGTGGCTGGGCAGCGCCTATGTTTCTCTGGAGATT
	A_21_P0008780	lnc-VPS33B-2	3.96896e-19	6.98684e-21	3.31259	up	4.06638	up	4.39014	up	LNCipedia lincRNA (lnc-VPS33B-2), lincRNA [lnc-VPS33B-2:1]	lnc-VPS33B-2:1	CTCTGCAGGAAGGCCATCCACAGTTATATCTTGCTTTAAAAAAGCAAAACTTTGAAAAAT
	A_23_P148473	IL2RG	3.98017e-19	7.01442e-21	-4.33944	down	-2.87611	down	-2.71295	down	Homo sapiens interleukin 2 receptor, gamma (IL2RG), mRNA [NM_000206]	interleukin 2 receptor, gamma	CTTTCCTGTTTGCATTGGAAGCCGTGGTTATCTCTGTTGGCTCCATGGGATTGATTATCA
	A_23_P258088	PACSIN1	3.98117e-19	7.02402e-21	-3.74031	down	-6.40578	down	-4.78873	down	Homo sapiens protein kinase C and casein kinase substrate in neurons 1 (PACSIN1), transcript variant 1, mRNA [NM_020804]	protein kinase C and casein kinase substrate in neurons 1	AACTCCGAGAAGTGCTGTGGTCTCAGCAATGCACCTGTTTTGTACATGATTGTGTAATTT
	A_33_P3320538	NUPL1	4.11482e-19	7.26793e-21	2.96588	up	2.42677	up	2.28638	up	nucleoporin like 1 [Source:HGNC Symbol;Acc:HGNC:20261] [ENST00000463407]	nucleoporin like 1	GGTGTAATGTAGCAGAGCTTAAGAATAGAACTCAATTATCACTTTTTGTGAACAAGTTGG
	A_33_P3250398	CTSZ	4.12249e-19	7.28961e-21	2.10264	up	1.81882	up	1.54372	up	cathepsin Z [Source:HGNC Symbol;Acc:HGNC:2547] [ENST00000503833]	cathepsin Z	TTCATGGGGTGAACCATGGGTAAGATGTTTTCATTTTCTTAAGGTCATTCCTAGAAAAAA
	A_23_P99653		4.1803e-19	7.40008e-21	-3.78096	down	-4.28113	down	-3.94877	down	T cell receptor alpha variable 13-2 [Source:HGNC Symbol;Acc:HGNC:12109] [ENST00000390439]		TCTCTGCAAATTGCAGCTACTCAACCTGGAGACTCAGCTGTCTACTTTTGTGCAGAGAAT
	A_23_P423331	NTNG2	4.18388e-19	7.41466e-21	4.86325	up	4.67946	up	5.50551	up	Homo sapiens netrin G2 (NTNG2), mRNA [NM_032536]	netrin G2	AACTATTTTTGTTTGTATTCACTGTCCCCTGCAAGGGGGACGGGGCGGGAGCACTGGTCA
	A_33_P3258141	CHUK	4.26513e-19	7.56705e-21	2.66628	up	1.80151	up	1.79086	up	Homo sapiens conserved helix-loop-helix ubiquitous kinase (CHUK), mRNA [NM_001278]	conserved helix-loop-helix ubiquitous kinase	CAGAGAAAGGACTGTGGACCTCTATCATCTGCTAAGTAATTTAGAAGATATTATTTGTCT
	A_33_P3310718	HSP90AB4P	4.42525e-19	7.85985e-21	2.86595	up	3.57356	up	3.31359	up	Homo sapiens heat shock protein 90kDa alpha (cytosolic), class B member 4, pseudogene (HSP90AB4P), non-coding RNA [NR_073415]	heat shock protein 90kDa alpha (cytosolic), class B member 4, pseudogene	TAAAATCTCGTGGCTTGGAATCCATGAGGACTCTATTAACTGGCGACACCTGTCTGAACT
	A_23_P155688	SPINK2	4.49841e-19	7.99867e-21	-5.09611	down	-5.79927	down	-5.272	down	Homo sapiens serine peptidase inhibitor, Kazal type 2 (acrosin-trypsin inhibitor) (SPINK2), transcript variant 2, mRNA [NM_021114]	serine peptidase inhibitor, Kazal type 2 (acrosin-trypsin inhibitor)	TTTACATGAGATTTGTTAACACACATTTTCTGAGAGCAGGTATGGAAGACAGCCATGTGT
	A_33_P3352085		4.70345e-19	8.3818e-21	4.16517	up	3.3592	up	3.60212	up	Q6IMN1_HUMAN (Q6IMN1) Growth arrest-specific 6, partial (13%) [THC2591638]		TCTGGTAGTGGCGGCAGGGGCTGGAGCCTCAGTTTACTTGTTCTGTAAATGCGGAGAACG
	A_33_P3236798	SRMS	4.70345e-19	8.37989e-21	3.12921	up	2.35224	up	2.03252	up	Homo sapiens src-related kinase lacking C-terminal regulatory tyrosine and N-terminal myristylation sites (SRMS), mRNA [NM_080823]	src-related kinase lacking C-terminal regulatory tyrosine and N-terminal myristylation sites	TTCTCCCAGAAGTCAGACGTCTGGTCCTTCGGCGTCCTGCTGCACGAGGTTTTCACCTAT
	A_33_P3333642		4.70751e-19	8.39831e-21	2.91653	up	2.21629	up	2.12714	up	Homo sapiens cDNA FLJ16303 fis, clone PROST2019487. [AK131315]		GGCACCTTGATCTTGGACTTTGTCTCCAGAATTGTGAGAATAAATTTCTGTTTATAAGCC
	A_21_P0010806	XLOC_l2_001496	4.7079e-19	8.40829e-21	7.02211	up	4.13611	up	3.9342	up	BROAD Institute lincRNA (XLOC_l2_001496), lincRNA [TCONS_l2_00002904]		TGTTCTTACAAAATTGCTCACTGCCTCTACCCCATGTCAGGTAATCAACTGTTCTGAATT
	A_23_P86900	B4GAT1	4.75022e-19	8.49324e-21	-2.72213	down	-2.73583	down	-2.60518	down	Homo sapiens beta-1,4-glucuronyltransferase 1 (B4GAT1), mRNA [NM_006876]	beta-1,4-glucuronyltransferase 1	AATCAGATGAAGGCATAAAATTTAGTTCTTAGCTCTTGAACAGAAGCCTAAAATTCCTGG
	A_21_P0011036	LOC374443	4.7916e-19	8.57667e-21	-2.47669	down	-2.09814	down	-2.02234	down	Homo sapiens C-type lectin domain family 2, member D pseudogene (LOC374443), transcript variant 1, non-coding RNA [NR_046444]	C-type lectin domain family 2, member D pseudogene	TCTACATGAACAGAAAATGGATTTGTAGCAAGCCAAACAATTATGTCTACAGTTGCCAGT
	A_21_P0014902		4.79357e-19	8.58965e-21	8.7015	up	5.23003	up	5.43802	up			ACTGATTTTAGGTGATAGTTTCCCCTCTAGTCTTGGCTCATTTAAAAAGCACAAACATTC
	A_33_P3379176		4.82819e-19	8.66119e-21	4.30158	up	3.52674	up	4.24665	up			TTGTTGAACCTGTGGCAAAGCAAGGAGGAGACTTGGTCTACTCCCTCCTGGGCAGCCTCT
	A_21_P0000590	ZEB2	4.90005e-19	8.79977e-21	2.21998	up	2.15135	up	2.06756	up	Homo sapiens zinc finger E-box binding homeobox 2 (ZEB2), transcript variant 3, non-coding RNA [NR_033258]	zinc finger E-box binding homeobox 2	GACAGTCATGTCAGAGTGAAATCTCTCAGGAAAAGTGTAACTAGTAGTTACAAAGTAAAT
	A_24_P315184		5.02199e-19	9.02865e-21	-3.38203	down	-2.90345	down	-2.90168	down	ribosomal protein L12 pseudogene 4 [Source:HGNC Symbol;Acc:HGNC:16587] [ENST00000432629]		TCTGTCTCCAAAAAAGGTTGGTGATGACATTGCCAAGGCAGGTGACTGGAAGGGCCTGAG
	A_24_P927189	OXNAD1	5.15331e-19	9.2749e-21	-3.88439	down	-3.93867	down	-3.58169	down	Homo sapiens oxidoreductase NAD-binding domain containing 1 (OXNAD1), mRNA [NM_138381]	oxidoreductase NAD-binding domain containing 1	AGTGTGTTGTCGTTATTAATTTGCTATTCCTTGTCCTATTCAGAAAGGATTTCAAGAGGC
	A_21_P0001671	lnc-HPCA-1	5.16587e-19	9.30768e-21	7.90756	up	4.35434	up	5.17405	up	LNCipedia lincRNA (lnc-HPCA-1), lincRNA [lnc-HPCA-1:1]	lnc-HPCA-1:1	AGAATCTTCTAAGCTGGCTGTTGTCCAGACTTGCCATCCTCATTGTAGTAAAACACTGGC
	A_33_P3224882		5.17972e-19	9.34286e-21	-3.97064	down	-4.36471	down	-4.30326	down	T cell receptor gamma variable 9 [Source:HGNC Symbol;Acc:HGNC:12295] [ENST00000444775]		TCTCACCATTCACAATGTAGAGAAACAGGACATAGCTACCTACTACTGTGCCTTGTGGGA
	A_32_P221799	HIST1H2AM	5.22419e-19	9.43336e-21	-1.64564	down	1.56568	up	1.34138	up	Homo sapiens histone cluster 1, H2am (HIST1H2AM), mRNA [NM_003514]	histone cluster 1, H2am	CTGAGAGCCACCACAAAGCTAAGGGCAAGTAAGGGCTGAACTTTAAAAATGTAAACTTAC
	A_24_P63019	IL1R2	5.25271e-19	9.49522e-21	5.77589	up	16.1947	up	14.9644	up	Homo sapiens interleukin 1 receptor, type II (IL1R2), transcript variant 1, mRNA [NM_004633]	interleukin 1 receptor, type II	TGGTACAAGGATTCTCTTCTTTTGGATAAAGACAATGAGAAATTTCTAAGTGTGAGGGGG
	A_33_P3222917	CD276	5.28869e-19	9.57069e-21	5.28214	up	6.22128	up	4.44775	up	Homo sapiens CD276 molecule (CD276), transcript variant 1, mRNA [NM_001024736]	CD276 molecule	TGGGACTCGGAGGGATTTTGTAAACTGGGGGTATATTTTGGGGAAAATAAATGTCTTTGT
	A_33_P3524912	LOC283038	5.29747e-19	9.59702e-21	4.14673	up	2.77647	up	3.3735	up	Homo sapiens uncharacterized LOC283038 (LOC283038), long non-coding RNA [NR_033848]	uncharacterized LOC283038	GCCGAGGAAGGAGTTCAAGTCCAGCCTGGACGGTCTCTAAAAATATTAAAATTTAAAAAA
	A_24_P83379	WDFY3	5.30368e-19	9.61873e-21	5.01554	up	4.65828	up	4.44999	up	WD repeat and FYVE domain containing 3 [Source:HGNC Symbol;Acc:HGNC:20751] [ENST00000426414]	WD repeat and FYVE domain containing 3	TGCCCTCATCAATAGACCATGTAACTACATTGGATAGAGCTTGTAATAGGTTTTGTGTCC
	A_23_P10591	METRNL	5.38676e-19	9.78001e-21	3.05677	up	1.9239	up	1.701	up	Homo sapiens meteorin, glial cell differentiation regulator-like (METRNL), mRNA [NM_001004431]	meteorin, glial cell differentiation regulator-like	AGCTTCCAGCCAAGGATGCCCTGGCCGATTGGAAATGCTGTAAAATGCAAACTAAGTTAT
	A_33_P3344618	TFEB	5.43206e-19	9.87297e-21	3.86816	up	2.41482	up	2.57099	up	Homo sapiens transcription factor EB (TFEB), transcript variant 1, mRNA [NM_007162]	transcription factor EB	CCGGAAGAGCAGCTGCCCTCCGACCCCTCACTTTGTGCCTTTAGTAAACACTGTGCTTTG
	A_33_P3254751	ST6GALNAC6	5.45536e-19	9.92607e-21	-2.71944	down	-2.35838	down	-2.31791	down	ST6 (alpha-N-acetyl-neuraminyl-2,3-beta-galactosyl-1,3)-N-acetylgalactosaminide alpha-2,6-sialyltransferase 6 [Source:HGNC Symbol;Acc:HGNC:23364] [ENST00000483353]	ST6 (alpha-N-acetyl-neuraminyl-2,3-beta-galactosyl-1,3)-N-acetylgalactosaminide alpha-2,6-sialyltransferase 6	TGCTGGTAGTCCTTGTGGGTCCTTCCAGACACTTTATGTGTGCATTTACAAATATTATGC
	A_24_P98109	SNX10	5.52391e-19	1.00617e-20	2.55583	up	2.02683	up	2.12342	up	Homo sapiens sorting nexin 10 (SNX10), transcript variant 2, mRNA [NM_013322]	sorting nexin 10	AAGAGTGGCAGAGGCTACTACAAAAAGCAACCTTTTCATTTTCACTAAGAGTTTAAAAGC
	A_33_P3236322		5.55095e-19	1.01219e-20	12.6148	up	6.11289	up	6.21528	up	PREDICTED: Homo sapiens uncharacterized LOC100996602 (LOC100996602), mRNA [XM_003846629]		ATTTATTTTCACAAGTGCATAGCGGCCAACACCACCAGCACTAACCAGAGTGGATTCTTG
	A_32_P96719	SHCBP1	5.79319e-19	1.0575e-20	1.57912	up	3.50959	up	2.66194	up	Homo sapiens SHC SH2-domain binding protein 1 (SHCBP1), mRNA [NM_024745]	SHC SH2-domain binding protein 1	ATTATTGAGACGTCAATGGGACGCATTTTTCTGTTGAGCTATGCAGTCGTCAAAACAGCG
	A_24_P339071	CDR2	5.90557e-19	1.07918e-20	-5.24149	down	-3.71628	down	-3.72167	down	Homo sapiens cerebellar degeneration-related protein 2, 62kDa (CDR2), mRNA [NM_001802]	cerebellar degeneration-related protein 2, 62kDa	CATTCAGACAAGTGTTTGTAGACTCTGAAGCCTAATGTTACTCATGACGTTTGCCTCATT
	A_23_P117992	ATP2C2	5.96503e-19	1.09122e-20	21.4595	up	14.6802	up	12.3244	up	Homo sapiens ATPase, Ca++ transporting, type 2C, member 2 (ATP2C2), transcript variant 2, mRNA [NM_014861]	ATPase, Ca++ transporting, type 2C, member 2	TCCATCACCGGATCAGTTTTTCCTCTTAGGAAAGCTGCAGGAACCTCGTGGGCTCCAGGG
	A_33_P3243399	SLMAP	6.0846e-19	1.11429e-20	3.27427	up	2.45877	up	2.61228	up	sarcolemma associated protein [Source:HGNC Symbol;Acc:HGNC:16643] [ENST00000467901]	sarcolemma associated protein	TCCAAATACCTATTCAGATTAGTTGGTTGAATAGCCAGCACTTTGAAGTAGAGCCTTAGG
	A_24_P368544	SLC25A26	6.17559e-19	1.13217e-20	-2.641	down	-2.51235	down	-2.67227	down	Homo sapiens solute carrier family 25 (S-adenosylmethionine carrier), member 26 (SLC25A26), transcript variant 1, mRNA [NM_173471]	solute carrier family 25 (S-adenosylmethionine carrier), member 26	CTAGGCTGCTGGTTTTAATTACCCTCAGATTTCACCCATAAAAACGCACAATTGTATTAT
	A_21_P0004541	lnc-CPEB4-1	6.17738e-19	1.13372e-20	3.65618	up	2.73549	up	2.76737	up	LNCipedia lincRNA (lnc-CPEB4-1), lincRNA [lnc-CPEB4-1:2]	lnc-CPEB4-1:2	ACCATGTCTCCTGGCCCCCGCTCCAGGGCTCCATGACTGCTGATTAAAAGAACAGCTTTG
	A_23_P128974	BATF	6.19304e-19	1.13782e-20	3.17009	up	2.18816	up	2.08532	up	Homo sapiens basic leucine zipper transcription factor, ATF-like (BATF), mRNA [NM_006399]	basic leucine zipper transcription factor, ATF-like	TATTAAGAAAGATGCTCAAGTCCCATGGCACAGAGCAAGGCGGGCAGGGAACGGTTATTT
	A_32_P76811	HLA-F-AS1	6.26772e-19	1.15277e-20	-1.93818	down	-2.19836	down	-2.251	down	Homo sapiens HLA-F antisense RNA 1 (HLA-F-AS1), transcript variant 1, long non-coding RNA [NR_026972]	HLA-F antisense RNA 1	CAGATCAAACAGGCTGTGAAGAAGTTTGTGACATTGATGTGGCCAAAGTCAACACTCTGA
	A_24_P329065	BTN3A1	6.3098e-19	1.16176e-20	-3.55925	down	-2.97117	down	-2.34137	down	Homo sapiens butyrophilin, subfamily 3, member A1 (BTN3A1), transcript variant 1, mRNA [NM_007048]	butyrophilin, subfamily 3, member A1	AGGCCACACTTGATAAATCATGGGGAACAGATGTGTTCCACCCAACAAATGTGATAAGTG
	A_19_P00322968	LINC00963	6.32295e-19	1.16542e-20	2.41748	up	1.39132	up	1.75174	up	Homo sapiens long intergenic non-protein coding RNA 963 (LINC00963), long non-coding RNA [NR_038955]	long intergenic non-protein coding RNA 963	ATGCAGGCCATCGATGGAAATGTCAGACAGTGCGAGTCCACGCCTGAACACTTCTGGGGT
	A_23_P126241	EIF4G3	6.34828e-19	1.17134e-20	2.41774	up	2.40657	up	2.30901	up	Homo sapiens eukaryotic translation initiation factor 4 gamma, 3 (EIF4G3), transcript variant 3, mRNA [NM_003760]	eukaryotic translation initiation factor 4 gamma, 3	TTTGCTGCGGATGTTTTTTGATTGTCTATATGACGAGGAGGTGATCTCCGAGGATGCCTT
	A_23_P208866	GMFG	6.361e-19	1.17494e-20	2.50887	up	1.90742	up	1.96685	up	Homo sapiens glia maturation factor, gamma (GMFG), transcript variant 1, mRNA [NM_004877]	glia maturation factor, gamma	CTCCAAGAAAAGTTGTCTTTCTTTCGTTGATCTCTGGGCTGGGGACTGAATTCCTGATGT
	A_23_P77304	AP3B2	6.38007e-19	1.17972e-20	7.51192	up	22.4181	up	9.2588	up	Homo sapiens adaptor-related protein complex 3, beta 2 subunit (AP3B2), transcript variant 2, mRNA [NM_004644]	adaptor-related protein complex 3, beta 2 subunit	CTGCCAACCTGGGTCGTGTTCCTTGTGGGACATCTGATGAGTACAGGTTTGCAGGGAGGA
	A_33_P3295786	FAM159A	6.46017e-19	1.19581e-20	-2.44218	down	-2.67993	down	-2.74277	down	Homo sapiens family with sequence similarity 159, member A (FAM159A), mRNA [NM_001042693]	family with sequence similarity 159, member A	GAAGCCTCTGTACCCAACCCTGACCTATGTGGACCAGTCCCATAAACATTCAATAAATGT
	A_23_P166848	LTF	6.6937e-19	1.24047e-20	2.14305	up	8.32667	up	7.82395	up	Homo sapiens lactotransferrin (LTF), transcript variant 1, mRNA [NM_002343]	lactotransferrin	ATATTTGGGACCACAGTATGTCGCAGGCATTACTAATCTGAAAAAGTGCTCAACCTCCCC
	A_23_P47904	CCDC65	6.6937e-19	1.24168e-20	-3.84599	down	-4.01149	down	-3.50961	down	Homo sapiens coiled-coil domain containing 65 (CCDC65), transcript variant 1, mRNA [NM_033124]	coiled-coil domain containing 65	CAAGATCATGATACACAGCCGTGAGAGTGAAGATGAGAACCGGTATATCCGTAATGACAA
	A_33_P3258542	SPINK8	6.72452e-19	1.25011e-20	9.55458	up	5.4593	up	6.23017	up	Homo sapiens serine peptidase inhibitor, Kazal type 8 (putative) (SPINK8), mRNA [NM_001080525]	serine peptidase inhibitor, Kazal type 8 (putative)	GGTTGCCTCTTCAAATATATCCCCTTTAATTACTAATGGTTGGATCAAACTCGTTGATTT
	A_24_P323941	FAM209A	6.72452e-19	1.25137e-20	3.19513	up	2.68004	up	3.18843	up	Homo sapiens family with sequence similarity 209, member A (FAM209A), mRNA [NM_001012971]	family with sequence similarity 209, member A	ACGATCTGTGAAATATGGGGAGAAGAAAGCTCTAGCTGAATGGATTTGTGTGTCAGGAGA
	A_33_P3386671	RORC	6.72452e-19	1.24991e-20	-6.3812	down	-6.22371	down	-6.01728	down	Homo sapiens RAR-related orphan receptor C (RORC), transcript variant 1, mRNA [NM_005060]	RAR-related orphan receptor C	GACGGGTTCATCTGAGTAAACATAAACCCCAACTTGTGCCATTCTTTATAAAATGATTTT
	A_21_P0000140	LEPROT	6.85912e-19	1.27777e-20	2.73507	up	2.25463	up	2.04795	up	Homo sapiens leptin receptor overlapping transcript (LEPROT), transcript variant 3, mRNA [NM_001198683]	leptin receptor overlapping transcript	AACCAGGATTATCATCTATATTGGAAGTCAGCAAACTGCCACATATAACCTGCTACCTGT
	A_33_P3308332	PLEKHB1	6.976e-19	1.30092e-20	-3.43229	down	-3.94077	down	-3.64085	down	Homo sapiens pleckstrin homology domain containing, family B (evectins) member 1 (PLEKHB1), transcript variant 1, mRNA [NM_021200]	pleckstrin homology domain containing, family B (evectins) member 1	TAAAGCTCCCCTGTAAATGGGGGCTCCATTAGTTCTGCTGCCGAGACTAATAAAGATTTG
	A_21_P0006698		7.06063e-19	1.31809e-20	3.7233	up	2.85611	up	3.23803	up	Q2H5N7_CHAGB (Q2H5N7) Predicted protein, partial (8%) [THC2634474]		TAGGGGCGGGTCCTGGAGGCTCTGATTTTTCTGGGTATTGAGGGACCCAAACTCAACCAG
	A_23_P327069	KIAA0232	7.10339e-19	1.32747e-20	4.87853	up	2.7819	up	2.75328	up	Homo sapiens KIAA0232 (KIAA0232), transcript variant 1, mRNA [NM_014743]	KIAA0232	CACCTTCCACAGGTGAATGGGACGGATTCGAAGTGAGCAAAGGGATTCACAAATTATGTA
	A_21_P0001369	lnc-PHGDH-2	7.13285e-19	1.33439e-20	4.63067	up	2.65894	up	2.87792	up	naa44g03.x1 NCI_CGAP_Kid11 Homo sapiens cDNA clone IMAGE:3259205 3', mRNA sequence [BF431439]	lnc-PHGDH-2:1	GCTGTGTTTAATTCACTCTTCTATGGAATACCAATGATTCTCACTAAGACTTTTGCCTTT
	A_23_P344281	ZIK1	7.15931e-19	1.34075e-20	-2.16761	down	-2.38204	down	-2.47635	down	Homo sapiens zinc finger protein interacting with K protein 1 (ZIK1), mRNA [NM_001010879]	zinc finger protein interacting with K protein 1	GCACTGGTCACTCCTATGTGCTAAGACAAGGCAGACATCTGTGTGTTCTCTTAAGTCTTT
	A_33_P3347511		7.16328e-19	1.3429e-20	6.37907	up	4.868	up	4.23235	up	capicua transcriptional repressor pseudogene 2 [Source:HGNC Symbol;Acc:HGNC:23935] [ENST00000420675]		TCTGGTGCAAGAGACCTGAAAGTGTGGGTGACCTGGAGCTACCAGGCTCCTCAGTCATCA
	A_24_P181254	OLFM4	7.51653e-19	1.41061e-20	8.01488	up	28.0333	up	16.7421	up	Homo sapiens olfactomedin 4 (OLFM4), mRNA [NM_006418]	olfactomedin 4	TTTTTCCTTTGATGTTCAAGTCCTAGTCTATAGGATTGGCAGTTTAAATGCTTTACTCCC
	A_23_P34788	KIF2C	7.61575e-19	1.43073e-20	1.33782	up	3.42722	up	2.32918	up	Homo sapiens kinesin family member 2C (KIF2C), transcript variant 1, mRNA [NM_006845]	kinesin family member 2C	AGAGGAAGGAGCTCTTAGTTACCCTTTTGTGTTGCCCTTCTTTCCATCAAGGGGAATGTT
	A_23_P5441	ABCB6	7.67198e-19	1.44281e-20	1.79677	up	2.39935	up	2.47494	up	Homo sapiens ATP-binding cassette, sub-family B (MDR/TAP), member 6 (Langereis blood group) (ABCB6), mRNA [NM_005689]	ATP-binding cassette, sub-family B (MDR/TAP), member 6 (Langereis blood group)	CTATGGTAAGGGAAAGGGACCTTTCCGAAAAACATCTTTTGGGGAAATAAAAATGTGGAC
	A_23_P201264	NMNAT1	8.16063e-19	1.53631e-20	1.76516	up	2.00783	up	1.87465	up	Homo sapiens nicotinamide nucleotide adenylyltransferase 1 (NMNAT1), transcript variant 1, mRNA [NM_022787]	nicotinamide nucleotide adenylyltransferase 1	GCTTGTGTTCCTGAGTGCCTTATATCACAAGGAAACGGCAAAATCAGGGGACTGGTATAA
	A_33_P3360341	GATA3	8.38638e-19	1.58046e-20	-3.68803	down	-4.68852	down	-4.0028	down	Homo sapiens GATA binding protein 3 (GATA3), transcript variant 1, mRNA [NM_001002295]	GATA binding protein 3	CGTGTTCTGTGTTAGTGATCACTGCCTTTAATACAGTCTGTTGGAATAATATTATAAGCA
	A_23_P52017	ASPM	8.39557e-19	1.58385e-20	1.5082	up	4.39807	up	2.78558	up	Homo sapiens asp (abnormal spindle) homolog, microcephaly associated (Drosophila) (ASPM), transcript variant 1, mRNA [NM_018136]	asp (abnormal spindle) homolog, microcephaly associated (Drosophila)	ATCACAAATCCCCTGCAAGCTATTCAAATGGTGATGGATACGCTTGGCATTCCTTATTAG
	A_24_P187023		8.43399e-19	1.59276e-20	-1.91725	down	-2.09481	down	-2.2802	down			ACGGTTATTAACCAGACTCAGAAAGAAAACCTCGGGAAATTCTACAAGGGCAAGAAGTAC
	A_23_P416747	CD3E	8.60065e-19	1.62593e-20	-3.6505	down	-4.17116	down	-4.01149	down	Homo sapiens CD3e molecule, epsilon (CD3-TCR complex) (CD3E), mRNA [NM_000733]	CD3e molecule, epsilon (CD3-TCR complex)	ACTCCCTGTTTCCTGGGCTAGTCTTGGACCCCACGAGAGAGAATCGTTCCTCAGCCTCAT
	A_23_P6293	UBASH3A	8.73907e-19	1.65382e-20	-4.1364	down	-4.45394	down	-4.16099	down	Homo sapiens ubiquitin associated and SH3 domain containing A (UBASH3A), transcript variant 1, mRNA [NM_018961]	ubiquitin associated and SH3 domain containing A	TTTCCAGAGGCGTCTTAGTCTCACCCAATGTGATTTGTAGAAGCACGAGACGCACTTTTA
	A_23_P41424	SLC39A8	8.83736e-19	1.67416e-20	2.24654	up	3.70835	up	1.69364	up	Homo sapiens solute carrier family 39 (zinc transporter), member 8 (SLC39A8), transcript variant 1, mRNA [NM_022154]	solute carrier family 39 (zinc transporter), member 8	GGAAAATGATTGACAAAGCCCAACAATGATCTCAGGAATTACATTTTCCAACAGACCAAA
	A_23_P502336	EMR2	8.97246e-19	1.70153e-20	3.63373	up	3.27944	up	2.98645	up	Homo sapiens egf-like module containing, mucin-like, hormone receptor-like 2 (EMR2), transcript variant 1, mRNA [NM_013447]	egf-like module containing, mucin-like, hormone receptor-like 2	CTTTGCTTGATATAGACTGCTAAGGTGAGATGGGGAATATCAGAGTCAGCTGCTGCTTGA
	A_33_P3292332	KIF5B	9.00816e-19	1.71007e-20	3.02386	up	2.08537	up	1.92553	up	Homo sapiens kinesin family member 5B (KIF5B), mRNA [NM_004521]	kinesin family member 5B	CAGTGCTTGAAGATACATTCACAAATACTTGGTTTGGGAAGACACCGTTTAATTTTAAGT
	A_23_P171270	H2AFB2	9.14573e-19	1.73799e-20	4.36364	up	3.74501	up	3.6039	up	Homo sapiens H2A histone family, member B2 (H2AFB2), mRNA [NM_001017991]	H2A histone family, member B2	CGACAGGCTACTGAGCACCCTTTTCAACACGACCACCATCTCTCAAGTGGCCCCTGGCGA
	A_23_P156748	ANKS1A	9.55424e-19	1.8175e-20	2.44498	up	3.14057	up	2.65856	up	Homo sapiens ankyrin repeat and sterile alpha motif domain containing 1A (ANKS1A), mRNA [NM_015245]	ankyrin repeat and sterile alpha motif domain containing 1A	CAGCAGAAAGCAGCTCAGAAGTATTGTTGCTCATGGTGTGGCAATGGACTGAACTGTAAT
	A_23_P122443	HIST1H1C	9.58449e-19	1.82515e-20	1.38829	up	2.94963	up	2.22358	up	Homo sapiens histone cluster 1, H1c (HIST1H1C), mRNA [NM_005319]	histone cluster 1, H1c	AGAAAGCTGCCAAAAGTGCTGCTAAGGCTGTGAAGCCCAAGGCCGCTAAGCCCAAGGTTG
	A_23_P49816	ADAP2	9.62358e-19	1.83449e-20	2.67523	up	2.24904	up	1.91395	up	Homo sapiens ArfGAP with dual PH domains 2 (ADAP2), mRNA [NM_018404]	ArfGAP with dual PH domains 2	AATGGAGGCATTGCAATGAAAAGGCACCCACAGCATCATGCAAGTGGCATCTTGTAAAAA
	A_33_P3274332	UBE2J1	9.85294e-19	1.8821e-20	2.58359	up	2.24662	up	1.95993	up	Homo sapiens ubiquitin-conjugating enzyme E2, J1 (UBE2J1), mRNA [NM_016021]	ubiquitin-conjugating enzyme E2, J1	TTCTGAACAGTTGCCTTCAGAACTAGTTTGAGCTGCTCAATAAAACCAGTGACTTTACTC
	A_19_P00327354	LINC00963	9.85294e-19	1.88155e-20	2.14755	up	1.47201	up	1.74155	up	long intergenic non-protein coding RNA 963 [Source:HGNC Symbol;Acc:HGNC:48716] [ENST00000419300]	long intergenic non-protein coding RNA 963	GAAAAACAAAGCCCAGCAGGTACGATGGTGATTATTATTGTTACTGGTGGCGCTCTATTA
	A_23_P39931	DYSF	9.87329e-19	1.88793e-20	4.10484	up	5.13093	up	4.86164	up	Homo sapiens dysferlin (DYSF), transcript variant 8, mRNA [NM_003494]	dysferlin	AGCTGGATGATGCTTTCCACCCAGAATGGTTTGTGTCCCTTTTTGAGCAGAAAACAGTGA
	A_21_P0009073	lnc-MPHOSPH6-2	9.96416e-19	1.90727e-20	4.41319	up	2.70126	up	2.61333	up	LNCipedia lincRNA (lnc-MPHOSPH6-2), lincRNA [lnc-MPHOSPH6-2:2]	lnc-MPHOSPH6-2:2	GAAATATGTCCTTCCTGCCACACAGCTTTGCTAAGATTCTGAAAGCATTCTGTCTCTTTC
	A_21_P0010444	lnc-NFAM1-1	9.99836e-19	1.91579e-20	4.7421	up	3.32258	up	3.80979	up	LNCipedia lincRNA (lnc-NFAM1-1), lincRNA [lnc-NFAM1-1:1]	lnc-NFAM1-1:1	GGCCCGAGCCTCCCAGAACCTTGGCACATGGTGGACGTGGAATAAATGTTGAAAATTGTG
	A_33_P3375934	NAMPT	9.99877e-19	1.91784e-20	5.16045	up	3.65962	up	3.41348	up	Homo sapiens nicotinamide phosphoribosyltransferase (NAMPT), mRNA [NM_005746]	nicotinamide phosphoribosyltransferase	GGAGAATGTCAGCTTTTCTCCCAAGTTGTATGTTAAGTCTATTCTAATATGTACTCAACA
	A_33_P3225625	TARP	1.00289e-18	1.92559e-20	-5.63314	down	-4.47793	down	-4.62563	down	Homo sapiens TCR gamma alternate reading frame protein (TARP), transcript variant 1, mRNA [NM_001003799]	TCR gamma alternate reading frame protein	CTGGACAAAGAACACAGATGTATCGTCAGACATGAGAATAATAAAAACGGAGTTGATCAA
	A_32_P142652		1.01355e-18	1.94806e-20	-2.0581	down	-2.06181	down	-2.30185	down	ribosomal protein S4X pseudogene 16 [Source:HGNC Symbol;Acc:HGNC:36365] [ENST00000595905]		CCTGGATCTTTTGACATTGTTCACATGGAAGATGCCAATGGCAACAGCTTTGCCACTCAA
	A_33_P3389967	USP49	1.02177e-18	1.96587e-20	2.37992	up	2.30563	up	2.1341	up	Homo sapiens ubiquitin specific peptidase 49 (USP49), transcript variant 1, mRNA [NM_001286554]	ubiquitin specific peptidase 49	TCTACTTTACCCCTCAGGCTGTCCAGTGGGGATAATTATTAATAAACATTTAATGGAAAA
	A_21_P0013477		1.02187e-18	1.96807e-20	-3.54218	down	-2.94069	down	-3.08839	down	ribosomal protein L29 pseudogene 19 [Source:HGNC Symbol;Acc:HGNC:35508] [ENST00000425197]		TGACAAAGATACAAATCTCTTAAGGAGGTGGACCCCAAGTTCCCGAGGAACATACGCTTT
	A_33_P3237874	TROAP	1.04106e-18	2.0112e-20	3.45335	up	3.90539	up	3.46673	up	Homo sapiens trophinin associated protein (TROAP), transcript variant 2, mRNA [NM_001100620]	trophinin associated protein	AGCTCCTGGAAAGCTCTTTGCTCTTAGAAGATCTCCCTTTCCTCCAGCAAAATGTCATCT
	A_33_P3260317	NR6A1	1.04106e-18	2.01051e-20	4.49922	up	3.50423	up	3.24825	up	Homo sapiens nuclear receptor subfamily 6, group A, member 1 (NR6A1), transcript variant 1, mRNA [NM_033334]	nuclear receptor subfamily 6, group A, member 1	CACATGCTTTTGTGTGAATGCAGCCAATGCATTTTCTTACAGTTTACAGAATGTGAAGAT
	A_23_P109410	THAP7	1.04106e-18	2.00732e-20	-2.59537	down	-2.69437	down	-2.48837	down	Homo sapiens THAP domain containing 7 (THAP7), transcript variant 1, mRNA [NM_030573]	THAP domain containing 7	CTTTGAGCTGGTGGGAATCAGTGGATATCACAGGCTAAAGGAGGGGGCAGTCCCCACCAT
	A_24_P299911	PASK	1.0605e-18	2.05084e-20	-3.78763	down	-4.81616	down	-4.53854	down	Homo sapiens PAS domain containing serine/threonine kinase (PASK), transcript variant 2, mRNA [NM_015148]	PAS domain containing serine/threonine kinase	ATCTTGCTGACTATACATGGGAAGAGGTGTTTCGAGTAAACAAGCCAGAAAGTGGAGTTC
	A_23_P400459	TRMT10B	1.06059e-18	2.0531e-20	-1.90187	down	-2.10761	down	-2.01539	down	Homo sapiens tRNA methyltransferase 10 homolog B (S. cerevisiae) (TRMT10B), transcript variant 1, mRNA [NM_144964]	tRNA methyltransferase 10 homolog B (S. cerevisiae)	ACCAGAATGGGAAAAACTATCATTCAGAGATACTGGCCATCAATCAAGTGTTTGATATCC
	A_19_P00321345		1.06679e-18	2.06721e-20	-3.99034	down	-3.60914	down	-2.91941	down	PREDICTED: Homo sapiens uncharacterized LOC102724420 (LOC102724420), ncRNA [XR_425263]		TTGTGGAGTAAGTGAGTGGGCCTGAGTTGAGAAGATCCTGGCCTTGGATTTTAAAACTGT
	A_23_P393051	KDF1	1.07062e-18	2.07674e-20	-2.45187	down	-3.41148	down	-3.19922	down	Homo sapiens keratinocyte differentiation factor 1 (KDF1), mRNA [NM_152365]	keratinocyte differentiation factor 1	AGCTTATCTTAAATGTATTGTATTGGGGGGTGGGCAGGGCCCACTCTATGTTATGTTAAG
	A_23_P72503	KLHL2	1.08206e-18	2.10107e-20	4.98512	up	4.08602	up	3.54174	up	Homo sapiens kelch-like family member 2 (KLHL2), transcript variant 1, mRNA [NM_007246]	kelch-like family member 2	TTTTTGATATTTAACAATGCTTAACACTTTAAATGCCACTTCTGAGGAATGGACCTGGTG
	A_33_P3659678	NR6A1	1.0912e-18	2.12096e-20	4.09844	up	3.10973	up	3.14584	up	Homo sapiens nuclear receptor subfamily 6, group A, member 1 (NR6A1), transcript variant 1, mRNA [NM_033334]	nuclear receptor subfamily 6, group A, member 1	CCGTCTTTGCCCTTTAATGACCATTGTTTTCTTTCTCTAAAATGTCTTGTAATAGGTGAT
	A_33_P3371810		1.09826e-18	2.13686e-20	-3.6409	down	-3.70948	down	-3.79455	down	T cell receptor beta variable 21-1 (pseudogene) [Source:HGNC Symbol;Acc:HGNC:12198] [ENST00000453262]		ATGAGCGATTTTTAGCCCAATGCTCCAAAAACTCATCCTGTACCTTGGAGATCCAGTCCA
	A_32_P18258	TALDO1	1.10183e-18	2.14598e-20	1.95949	up	1.73998	up	1.77353	up	Homo sapiens transaldolase 1 (TALDO1), mRNA [NM_006755]	transaldolase 1	GATGAATCTTGCGTTTTTTACAAATCGGAGCAGGGACAGATCATAGATTTCTGATTTTAT
	A_23_P325924	GAREML	1.14184e-18	2.22614e-20	-3.7592	down	-3.42163	down	-3.384	down	Homo sapiens GRB2 associated, regulator of MAPK1-like (GAREML), transcript variant 2, mRNA [NM_001191033]	GRB2 associated, regulator of MAPK1-like	TACCTAGTCTACCTATTTATTTCCTCCACTTTTTATCTTAAAAGTAGCTAAGCCATGCTG
	A_23_P426809	ARHGEF11	1.1535e-18	2.25115e-20	3.38907	up	2.81731	up	2.67955	up	Homo sapiens Rho guanine nucleotide exchange factor (GEF) 11 (ARHGEF11), transcript variant 2, mRNA [NM_198236]	Rho guanine nucleotide exchange factor (GEF) 11	GAAGAGGGGTTTCACTTGTATCTCCTTAGTTAACAACCCAGTTCCAGGATCGAGCCTAAA
	A_19_P00317269	LINC01550	1.17846e-18	2.3022e-20	-3.46156	down	-4.43597	down	-3.58867	down	Homo sapiens long intergenic non-protein coding RNA 1550 (LINC01550), long non-coding RNA [NR_015430]	long intergenic non-protein coding RNA 1550	TTTCTCTGACTTAATTCATCTCTGGGTCCATTTGAAGCACAGCAGAAGAGAGGGGAAGAG
	A_24_P177964	NCKAP5L	1.17918e-18	2.30593e-20	2.64224	up	1.89364	up	1.6144	up	Homo sapiens NCK-associated protein 5-like (NCKAP5L), mRNA [NM_001037806]	NCK-associated protein 5-like	TTGTTTAAAATGCGGCTGCTCTGCTTCCTGCCTCTGCTTCTGCCGTATCCCTAATAAAAT
	A_21_P0009394	lnc-AMZ2-1	1.18052e-18	2.31086e-20	-3.14052	down	-3.21705	down	-2.69614	down	LNCipedia lincRNA (lnc-AMZ2-1), lincRNA [lnc-AMZ2-1:1]	lnc-AMZ2-1:1	CGCTGCATCGTAAGGATGGAGGAGCTGTTGTCTCCACAGCTGACAGTTCTAGAAACTGAG
	A_33_P3708658	lnc-RP11-712L6.5.1-2	1.20365e-18	2.35851e-20	9.08913	up	6.17716	up	5.4287	up	Homo sapiens cDNA FLJ39051 fis, clone NT2RP7011452. [AK096370]	lnc-RP11-712L6.5.1-2:1	GCCCGATTTAGTGATTCCACAGTGTATACATATAACAAAACATGTTGTACACCATAAATG
	A_23_P208516	MBOAT7	1.20437e-18	2.3623e-20	3.18988	up	2.01518	up	2.34429	up	Homo sapiens membrane bound O-acyltransferase domain containing 7 (MBOAT7), transcript variant 1, mRNA [NM_024298]	membrane bound O-acyltransferase domain containing 7	CCCCTGGGCAGTGGGTTTTGGGCAAATTCCCTTTCTTTGCATCCACAATGTGGGGTCGGA
	A_23_P151150	FOXM1	1.21848e-18	2.3956e-20	1.31744	up	3.52405	up	2.43716	up	Homo sapiens forkhead box M1 (FOXM1), transcript variant 1, mRNA [NM_202002]	forkhead box M1	GGTAGGATGACCTGGGGTTTCAATTGACTTCTGTTCCTTGCTTTTAGTTTTGATAGAAGG
	A_33_P3232688		1.21848e-18	2.3939e-20	3.9421	up	2.85135	up	3.45033	up	colony stimulating factor 2 receptor, alpha, low-affinity (granulocyte-macrophage) [Source:HGNC Symbol;Acc:HGNC:2435] [ENST00000381524]		TTGCATCTCTTTCCAACCCAACTACTGAGGTACTGTGTAGCCTCCTCCTTGAATAACTAA
	A_33_P3295056	PTPRCAP	1.21848e-18	2.39719e-20	-5.96417	down	-3.86746	down	-3.75411	down	Homo sapiens protein tyrosine phosphatase, receptor type, C-associated protein (PTPRCAP), mRNA [NM_005608]	protein tyrosine phosphatase, receptor type, C-associated protein	AATGACCTTGAGCGACAGGAGGATGAGCAGGACACAGACTATGACCACGTCGCGGATGGT
	A_33_P3404097	PGM5P2	1.21937e-18	2.40135e-20	2.53623	up	2.3295	up	2.71285	up	Homo sapiens phosphoglucomutase 5 pseudogene 2 (PGM5P2), non-coding RNA [NR_002836]	phosphoglucomutase 5 pseudogene 2	AGAAGTGCTTAAAGGAGCTGATGGAGCTGAAAACCAAGGCTCGAGAACTACAGGAAGAAT
	A_33_P3259943	PLBD1-AS1	1.26886e-18	2.5013e-20	2.05087	up	3.20467	up	3.2103	up	Homo sapiens PLBD1 antisense RNA 1 (PLBD1-AS1), long non-coding RNA [NR_120465]	PLBD1 antisense RNA 1	TGTGTTGACCGTATCTCCAAATAGACAATAACGAGGCATCTTGATTCCCACAACTCCAGC
	A_33_P3278573	MAGIX	1.29863e-18	2.56255e-20	2.50402	up	2.43794	up	2.22186	up	Homo sapiens MAGI family member, X-linked (MAGIX), transcript variant 1, mRNA [NM_024859]	MAGI family member, X-linked	TTCCAGCCGGCTAGCCTGCGCTTCTGGTTCTGGGAGGGGGAGGTAATAAAATGGTTCGAT
	A_33_P3342653	ADAM33	1.3143e-18	2.59606e-20	3.29751	up	2.59289	up	3.11464	up	Homo sapiens ADAM metallopeptidase domain 33 (ADAM33), transcript variant 2, mRNA [NM_153202]	ADAM metallopeptidase domain 33	TGGGGCTGGTGGCCCTGGAGGCTGAAGGCCAGGAGCTCCTGCTTGAGCTGGAGAAGAACC
	A_33_P3298990	CD5	1.32487e-18	2.61956e-20	-4.2316	down	-4.50241	down	-4.29077	down	Homo sapiens CD5 molecule (CD5), mRNA [NM_014207]	CD5 molecule	GCCTCAAAGCAACCATGGCCTACTTAAAAACCAAACCAAAAATAAAGAGTTTAGTTGAGG
	A_19_P00319675	LINC00963	1.32621e-18	2.62482e-20	2.4201	up	1.43658	up	1.82534	up	long intergenic non-protein coding RNA 963 [Source:HGNC Symbol;Acc:HGNC:48716] [ENST00000444184]	long intergenic non-protein coding RNA 963	CTGCATTGCGGTGATAGGGCCAAGGGCCTGGGCCTTCAATTCTCCAGACTTGCCAAAATG
	A_33_P3247252		1.35196e-18	2.67844e-20	5.67913	up	4.76933	up	4.56787	up			CCCTGGGCGCGGCCGAAGCGCCACTACTGTCTCCTCAAACTATATCTTTTCTTCAAATAA
	A_33_P3325229	LOC389906	1.35424e-18	2.68564e-20	-2.88527	down	-2.46135	down	-2.58427	down	Homo sapiens zinc finger protein 839 pseudogene (LOC389906), non-coding RNA [NR_034031]	zinc finger protein 839 pseudogene	AAAGTCATATATAGGGAAGTGGGGACTGGCCCAGCATTTTAAACTTAATCCAGGCCATGG
	A_21_P0005721	NCRNA00249	1.37296e-18	2.72546e-20	11.7757	up	7.31041	up	5.87473	up	PREDICTED: Homo sapiens uncharacterized LOC101926947 (NCRNA00249), transcript variant X2, ncRNA [XR_426330]	uncharacterized LOC101926947	AGGGTGCCACCACAGGTAACCATCAGAGAACACACTGCTATTTTCAAATAAACAGAACTG
	A_21_P0000520		1.37629e-18	2.73478e-20	3.84681	up	2.52621	up	3.16063	up			AGACTAAGGAATGTTCCTTCAGGGAAACTAGGGTGGGGTTTGAATGAGATGAGGGGGGCA
	A_33_P3270852	RPS29	1.38991e-18	2.76458e-20	-1.81228	down	-2.09971	down	-2.10714	down	Homo sapiens ribosomal protein S29 (RPS29), transcript variant 1, mRNA [NM_001032]	ribosomal protein S29	TCTCGTTCTTGTCGTGTCTATTCAAACCAGCACGGTCTGATCCGGAAATATGGCCTCAAT
	A_21_P0011740	LOC101927522	1.41778e-18	2.82396e-20	6.8238	up	3.38764	up	5.04498	up	PREDICTED: Homo sapiens uncharacterized LOC101927522 (LOC101927522), transcript variant X1, ncRNA [XR_243988]	uncharacterized LOC101927522	TCATATTTGTTCCCTCCTATCCTGAGTCCTAGTGGGTTTTCATTTGCACTCCAGGGTTCA
	A_33_P3227944	CRHR1-IT1	1.41778e-18	2.8256e-20	-2.1447	down	-3.49757	down	-2.88853	down	Homo sapiens CRHR1 intronic transcript 1 (non-protein coding) (CRHR1-IT1), transcript variant 2, long non-coding RNA [NR_026906]	CRHR1 intronic transcript 1 (non-protein coding)	CACTGTGCTAAACGCCTTCCATGTATTCATCTCATTAGTAAACATTTCTGAAACTATTCT
	A_23_P47991	MED13L	1.42998e-18	2.85274e-20	3.77746	up	2.30981	up	2.35734	up	Homo sapiens mediator complex subunit 13-like (MED13L), mRNA [NM_015335]	mediator complex subunit 13-like	AAATGGGGAGGGGAAAAGGGTGGGATTGTCCAGCATGCTTGTATGTATATTTCAGAACCT
	A_33_P3284533		1.49314e-18	2.98168e-20	-3.41744	down	-3.76299	down	-3.34447	down	T cell receptor alpha variable 14/delta variable 4 [Source:HGNC Symbol;Acc:HGNC:12110] [ENST00000390440]		TCATTGAATTTCCAGAAGGCAAGAAAATCCGCCAACCTTGTCATCTCCGCTTCACAACTG
	A_23_P27315	EMILIN2	1.52979e-18	3.05789e-20	2.77515	up	2.01604	up	1.86296	up	Homo sapiens elastin microfibril interfacer 2 (EMILIN2), mRNA [NM_032048]	elastin microfibril interfacer 2	ACTGTTCCCAAAGCTTGTTGGGCTCCTTAAATGGCATGTACAATTTAAGTGCAAAGACAG
	A_33_P3275722	LY6G6D	1.57147e-18	3.14431e-20	3.23887	up	5.13567	up	4.4824	up	Homo sapiens lymphocyte antigen 6 complex, locus G6D (LY6G6D), mRNA [NM_021246]	lymphocyte antigen 6 complex, locus G6D	ATTTTGGCTGCAGCAGCTACCGCCCTGACCTGTCTCTTGCCAGGACTGTGGAGCGGATAG
	A_33_P3242369		1.58799e-18	3.1805e-20	-3.15996	down	-2.69063	down	-2.61196	down	Homo sapiens PP10881 mRNA, complete cds. [AF370399]		GCTAACCAAAATCCAAGCTTTTTGAGCATCAGGATTTCCTTAACACTCTCTCTTACTTTC
	A_23_P210425	MYL9	1.62991e-18	3.26767e-20	-1.65066	down	2.58288	up	2.38718	up	Homo sapiens myosin, light chain 9, regulatory (MYL9), transcript variant 2, mRNA [NM_181526]	myosin, light chain 9, regulatory	TGAGGAAGTGGACGAGATGTACCGGGAGGCACCCATTGATAAGAAAGGCAACTTCAACTA
	A_21_P0012944	SMA4	1.65238e-18	3.31597e-20	6.42935	up	3.7676	up	4.17506	up	Homo sapiens glucuronidase, beta pseudogene (SMA4), transcript variant 2, non-coding RNA [NR_024054]	glucuronidase, beta pseudogene	TTAAAGGAATAATTCTCCTCCGACTCTGCCGTTCCATCCAGTGAAACTCTTCATTCTGGG
	A_19_P00319069	lnc-IL1R2-2	1.66773e-18	3.35006e-20	4.44886	up	4.2508	up	6.08065	up	Homo sapiens cDNA FLJ31315 fis, clone LIVER1000303. [AK055877]	lnc-IL1R2-2:1	CTAGTTCTATTTCCAAAATATTATTGGTGCCCCTAGTTGTACTGCCTGAGTGTTGTCAGA
	A_32_P216548	LDLRAP1	1.70554e-18	3.42937e-20	-8.40054	down	-5.23049	down	-4.80427	down	Homo sapiens low density lipoprotein receptor adaptor protein 1 (LDLRAP1), mRNA [NM_015627]	low density lipoprotein receptor adaptor protein 1	GATGATGTGTGAAACCTGACACCTAGATTTATTTGGAAATATTCTATGACCACTTTACAG
	A_33_P3329301	LOC646014	1.7505e-18	3.52321e-20	2.29286	up	2.33098	up	2.45189	up	Homo sapiens cDNA FLJ44593 fis, clone BLADE2002744. [AK126557]	uncharacterized LOC646014	TGGTTTAGTGTGTCCTGGGTCCCAACTGTGCTGGAGTCTAGTAGCGGCGGCTGGTTTAGT
	A_21_P0009853	LINC01270	1.76616e-18	3.55822e-20	4.32639	up	4.78832	up	6.04712	up	long intergenic non-protein coding RNA 1270 [Source:HGNC Symbol;Acc:HGNC:27658] [ENST00000457853]	long intergenic non-protein coding RNA 1270	ACACGTTTATTACAGGAAGCACCAGTTAGCCCAGATGCTTCTCATCTTTGGAGTTGAGCT
	A_24_P126406	DNAH17	1.77495e-18	3.57943e-20	7.78889	up	3.60533	up	4.27244	up	Homo sapiens dynein, axonemal, heavy chain 17 (DNAH17), mRNA [NM_173628]	dynein, axonemal, heavy chain 17	TCAAGAATGTGAAAGAATGAACATCCTGACCAACGAAATGCGCCGTTCGCTCAAGGAGCT
	A_23_P372834	AQP1	1.8159e-18	3.66918e-20	-1.14731	down	2.92988	up	1.9457	up	Homo sapiens aquaporin 1 (Colton blood group) (AQP1), transcript variant 1, mRNA [NM_198098]	aquaporin 1 (Colton blood group)	CCTCTGCATATATGTCTCTTTGGAGTTGGAATTTCATTATATGTTAAGAAAATAAAGGAA
	A_23_P77437	PRMT7	1.8159e-18	3.66616e-20	-3.08092	down	-2.40407	down	-2.47433	down	Homo sapiens protein arginine methyltransferase 7 (PRMT7), transcript variant 1, mRNA [NM_019023]	protein arginine methyltransferase 7	AGAAAAATCTTCAAGGCTAACCACTTGGAAGATAAAATTAACATCATAGAGAAACGGCCG
	A_23_P8281	IFNGR1	1.81668e-18	3.67434e-20	4.31218	up	2.73065	up	2.54001	up	Homo sapiens interferon gamma receptor 1 (IFNGR1), mRNA [NM_000416]	interferon gamma receptor 1	CTTTACATCCAGATAGGTTACCAGTAACGGAACAGTATCCAGTACTCCTGGTTCCTAGGT
	A_33_P3315856	DHX34	1.82022e-18	3.68867e-20	3.92605	up	2.79836	up	3.25816	up	Homo sapiens DEAH (Asp-Glu-Ala-His) box polypeptide 34 (DHX34), mRNA [NM_014681]	DEAH (Asp-Glu-Ala-His) box polypeptide 34	GAGCACTGGTGTTCACGTGGGACCACAGGCTGCACCATAAGACCCACTCACAATAAAAAA
	A_33_P3234643	TMCO3	1.82022e-18	3.68533e-20	2.05446	up	2.56272	up	2.30316	up	Homo sapiens transmembrane and coiled-coil domains 3 (TMCO3), mRNA [NM_017905]	transmembrane and coiled-coil domains 3	TACATGACACTGTTAATGATTGCATTTGGCTTGCTGTGGGGGCATCTCTTGCGGATCAAA
	A_23_P104876	SPA17	1.82799e-18	3.70802e-20	3.56162	up	2.69249	up	2.29759	up	Homo sapiens sperm autoantigenic protein 17 (SPA17), mRNA [NM_017425]	sperm autoantigenic protein 17	TCTCAGATATCTGGGAAGGAGGAAGAGACATCAGTCACCATCTTAGACTCTTCTGAGGAA
	A_33_P3316696		1.83322e-18	3.72224e-20	5.02876	up	2.89487	up	3.39918	up			TGTTAATGATCTTAATAAAAGCTTTCTGCTGTCTTTGGGGTGCTGGGTGGGTCTGGGAAG
	A_21_P0010728	FCGR1B	1.85658e-18	3.77333e-20	3.50771	up	3.49272	up	3.24588	up	Homo sapiens Fc fragment of IgG, high affinity Ib, receptor (CD64) (FCGR1B), transcript variant 3, mRNA [NM_001244910]	Fc fragment of IgG, high affinity Ib, receptor (CD64)	GCTCAGGCAAGGGAAAGCATCACTACACATCAGCAGGAATATCACAATACACTGTGAAAG
	A_24_P169234	ZAP70	1.91585e-18	3.89756e-20	-3.2989	down	-3.8911	down	-3.40138	down	Homo sapiens zeta-chain (TCR) associated protein kinase 70kDa (ZAP70), transcript variant 1, mRNA [NM_001079]	zeta-chain (TCR) associated protein kinase 70kDa	GTGTCCACCCGAACTGTACGCACTCATGAGTGACTGCTGGATCTACAAGTGGGAGGATCG
	A_23_P78108	ALDOC	1.93613e-18	3.94263e-20	-1.95365	down	-2.12263	down	-2.02132	down	Homo sapiens aldolase C, fructose-bisphosphate (ALDOC), mRNA [NM_005165]	aldolase C, fructose-bisphosphate	TGGCCAGGGCCAAATAGCTATGCAGAGCAGAGATGCCTTCACCTGGCACCAACTTGTCTT
	A_24_P184555	PXN	1.95978e-18	3.99853e-20	2.26449	up	1.60473	up	1.67699	up	Homo sapiens paxillin (PXN), transcript variant 1, mRNA [NM_002859]	paxillin	CTGTAAACTTCCAAGCTGGCTTTTCCCATTTCAATTCCTGTGATTTATGCCAATAAAGTT
	A_24_P301186	WDR89	1.95978e-18	3.99595e-20	-3.40131	down	-2.93586	down	-3.03128	down	Homo sapiens WD repeat domain 89 (WDR89), transcript variant 1, mRNA [NM_001008726]	WD repeat domain 89	CGGACTACATAAGCGTTAAAAATTGTGTTTTTCAGAATCTTTAAAATATAAGACAGTGCT
	A_33_P3352843	lnc-DRD5-1	1.97268e-18	4.02873e-20	4.62827	up	3.24884	up	3.75249	up	Q3FGK9_9BURK (Q3FGK9) CheW-like protein, partial (5%) [THC2646044]	lnc-DRD5-1:1	TGAGACCCCTGAAGGTGCCAGGCATGGGGCTTGGGAGCTGGGCATATGGTGATTAAAAAA
	A_23_P337262	APCDD1	2.00298e-18	4.09456e-20	5.08074	up	1.73377	up	2.06412	up	Homo sapiens adenomatosis polyposis coli down-regulated 1 (APCDD1), mRNA [NM_153000]	adenomatosis polyposis coli down-regulated 1	GTTTTATATGCTGGAATCCAATGCAGAGTTGGTTTGGGACTGTGATCAAGACACCTTTTA
	A_33_P3385842	CCDC7	2.00338e-18	4.09933e-20	-7.12368	down	-4.42276	down	-3.78094	down	Homo sapiens coiled-coil domain containing 7 (CCDC7), transcript variant 1, mRNA [NM_145023]	coiled-coil domain containing 7	ATCACTGGTTTCAGATTCAGGTGGACAAAGGACAAGTGATAAAATCCAAGAATATCCACA
	A_21_P0014120	LOC100507291	2.0163e-18	4.12975e-20	2.01341	up	1.22591	up	1.12786	up	Homo sapiens uncharacterized LOC100507291 (LOC100507291), transcript variant 1, long non-coding RNA [NR_121608]	uncharacterized LOC100507291	CAATGCCTGGTGACTGGGGCTGGTTCATACTAGACGATCAATAAATGCTCCTTGAATGAA
	A_23_P23443	EFHD2	2.07311e-18	4.2502e-20	3.49149	up	2.0958	up	2.04224	up	Homo sapiens EF-hand domain family, member D2 (EFHD2), mRNA [NM_024329]	EF-hand domain family, member D2	GACCCGGATTGCGTTTGCCTTAGCGGATATGTTTATACAGATGAATATAAAATGTTTTTT
	A_33_P3351388		2.0764e-18	4.26511e-20	3.55124	up	2.79422	up	3.03017	up			AAGTTCTAAGTCCCATGGAAAGTGGCAGTGGTTGGGCTGGACTGTGGCTGGAGGATCACC
	A_33_P3389298	ZNF30	2.0764e-18	4.26325e-20	-3.96839	down	-3.44485	down	-3.41275	down	Homo sapiens zinc finger protein 30 (ZNF30), transcript variant 1, mRNA [NM_001099438]	zinc finger protein 30	GGGAAAGCCTTTACTGTTTATGGACAACTTATTGGACATCAGAGTGTTCACACTGGTGAG
	A_23_P144465	PAPSS1	2.08404e-18	4.28491e-20	2.83906	up	2.69172	up	2.35485	up	Homo sapiens 3'-phosphoadenosine 5'-phosphosulfate synthase 1 (PAPSS1), mRNA [NM_005443]	3'-phosphoadenosine 5'-phosphosulfate synthase 1	AAAGTGCTGACGATGGCCCCTGGTTTAATCACTTTGGAAATAGTTCCCTTTCGAGTTGCA
	A_23_P125717	NAP1L3	2.09661e-18	4.31489e-20	-3.927	down	-4.02818	down	-4.30069	down	Homo sapiens nucleosome assembly protein 1-like 3 (NAP1L3), mRNA [NM_004538]	nucleosome assembly protein 1-like 3	GTAAGCTGTTGTCAATTATCTAAAGCATGTTAGTTTGGTGCTACACAGTGTTGATTTTTG
	A_23_P79134	PLEKHF1	2.14731e-18	4.42348e-20	-2.65619	down	-3.06668	down	-2.84143	down	Homo sapiens pleckstrin homology domain containing, family F (with FYVE domain) member 1 (PLEKHF1), mRNA [NM_024310]	pleckstrin homology domain containing, family F (with FYVE domain) member 1	TTCAGGAAGCCCCAGAACACCCACAGGTCTTGGTAACAAACGCCACCTTACACTCTGCAG
	A_33_P3326447	LOC100128276	2.16498e-18	4.46413e-20	6.00923	up	5.51899	up	7.19243	up	Homo sapiens cDNA FLJ43282 fis, clone LIVER2007415. [AK125272]	uncharacterized LOC100128276	TAGTGTCTTATCAAATGTCTTCGGGGGTGAGTTCATTCCTTCTACCTCCTCTGCTATGGA
	A_33_P3260964	LINC01300	2.17e-18	4.48016e-20	7.08048	up	10.4586	up	12.4085	up	Homo sapiens long intergenic non-protein coding RNA 1300 (LINC01300), long non-coding RNA [NR_024441]	long intergenic non-protein coding RNA 1300	TTCATCCTGATTCCATGCCAAGGCTTATAGTAGGTGCTCAATAAATGCTTGCTGAATGAT
	A_23_P139585	PDE1B	2.17e-18	4.48305e-20	2.79421	up	3.63927	up	2.87251	up	Homo sapiens phosphodiesterase 1B, calmodulin-dependent (PDE1B), transcript variant 1, mRNA [NM_000924]	phosphodiesterase 1B, calmodulin-dependent	GGGCCCTGTTCATGCGAAATCCACATCCATGGTCTCCTAGACCTGCTACCCTGGTACTTC
	A_33_P3243502	LOC729732	2.23146e-18	4.61442e-20	5.74355	up	3.10925	up	3.50883	up	Homo sapiens uncharacterized LOC729732 (LOC729732), long non-coding RNA [NR_047662]	uncharacterized LOC729732	GAGGCTGCGGCTCTTGCTGGAGGGGGGAAGCGCACAGCCCCAGGACGGCGAGGACGGGGA
	A_23_P171366	USP11	2.23813e-18	4.63262e-20	-2.05441	down	-1.98998	down	-1.97264	down	Homo sapiens ubiquitin specific peptidase 11 (USP11), mRNA [NM_004651]	ubiquitin specific peptidase 11	ACTTTGATGACAACAGCGTCTCCCCTGTCAATGAGAATCAGATCGAGTCCAAGGCAGCCT
	A_33_P3216601	FHIT	2.24591e-18	4.65315e-20	-2.69756	down	-4.34268	down	-3.72538	down	Homo sapiens fragile histidine triad (FHIT), transcript variant 1, mRNA [NM_002012]	fragile histidine triad	TGGAGATCAGAGGAGGAAATGGCAGCAGAAGCCGCAGCTCTGCGGGTCTACTTTCAGTGA
	A_33_P3489646	SPI1	2.25535e-18	4.67716e-20	3.37234	up	3.00712	up	2.85573	up	Homo sapiens Spi-1 proto-oncogene (SPI1), transcript variant 1, mRNA [NM_001080547]	Spi-1 proto-oncogene	ACCCGGGGTACTGCCTTGGGAGTCTCAAGTCCGTATGTAAATCAGATCTCCCCTCTCACC
	A_23_P141863	ZNF544	2.2671e-18	4.70599e-20	-3.95772	down	-2.47452	down	-2.70695	down	Homo sapiens zinc finger protein 544 (ZNF544), mRNA [NM_014480]	zinc finger protein 544	AGCTATCAGTGCGACGTGTATTAAGCAGCGGTTGTGACTCATTGAACATCAGAGGACATA
	A_23_P32078	SLC28A3	2.27238e-18	4.72143e-20	3.5914	up	6.20736	up	3.76691	up	Homo sapiens solute carrier family 28 (concentrative nucleoside transporter), member 3 (SLC28A3), transcript variant 2, mRNA [NM_022127]	solute carrier family 28 (concentrative nucleoside transporter), member 3	GCCAGACTCATAGGTTATAAGACCTTCTTCAATGAATTTGTGGCTTATGAGCACCTCTCA
	A_33_P3289296	TMEM37	2.27913e-18	4.74388e-20	4.29729	up	6.96485	up	3.1734	up	Homo sapiens transmembrane protein 37 (TMEM37), mRNA [NM_183240]	transmembrane protein 37	AGCACGTCTGTACTTCTGTTCATTAAAGTGCTCCCTTTCTAGTCCTTTTTCTGCCCAGAA
	A_21_P0012080		2.27913e-18	4.74571e-20	3.42003	up	2.50409	up	3.20579	up	long intergenic non-protein coding RNA 152 [Source:HGNC Symbol;Acc:HGNC:28717] [ENST00000437561]		AGACATCTGCTGCTAATGGATGAGCAGTCAACCTGGACGCAGGAAATCATTTTTTATTTG
	A_23_P366394	ZAK	2.27913e-18	4.74893e-20	2.8574	up	2.30208	up	2.15637	up	Homo sapiens sterile alpha motif and leucine zipper containing kinase AZK (ZAK), transcript variant 1, mRNA [NM_016653]	sterile alpha motif and leucine zipper containing kinase AZK	GTGAAATGCTTCATGTTTTACAAACCAAAAAGTCGGGTAGCAACAAACTTATTGTATGTC
	A_33_P3341424	MYO10	2.32195e-18	4.84535e-20	3.82092	up	4.47428	up	3.74135	up	Homo sapiens myosin X (MYO10), mRNA [NM_012334]	myosin X	ACAGTACAGAGACCAAATCTACCCTGCCACCTGTTTTTGTGAATAAAGTTTTATTGAAAC
	A_32_P170749	STAG3	2.32195e-18	4.8473e-20	-2.56229	down	-2.1017	down	-2.07678	down	Homo sapiens stromal antigen 3 (STAG3), transcript variant 4, mRNA [NM_001282718]	stromal antigen 3	GTCCCAAGCGGTACATCGTCATAGCCGGAAACAGTCAGAGCCACCAGCCAATGATATTTT
	A_23_P126212	CLSPN	2.32196e-18	4.85192e-20	2.1652	up	4.49769	up	3.92577	up	Homo sapiens claspin (CLSPN), transcript variant 1, mRNA [NM_022111]	claspin	TTCCCAGATGGACTTGTTCCACAGAGACTCTGATGATGATCAGACTGAAGAACAGCTTGA
	A_24_P921155	C3orf17	2.33694e-18	4.88782e-20	-2.05442	down	-2.16376	down	-2.11758	down	Homo sapiens chromosome 3 open reading frame 17 (C3orf17), transcript variant 1, mRNA [NM_015412]	chromosome 3 open reading frame 17	TCTCACCAGCTACAGGAACTGCCTAGCACTTGGGTATGTACAACCTGGAAGAGGTGTGGG
	A_23_P67785	SPAG16	2.34255e-18	4.90416e-20	-3.29542	down	-3.27266	down	-3.11779	down	Homo sapiens sperm associated antigen 16 (SPAG16), transcript variant 2, mRNA [NM_001025436]	sperm associated antigen 16	TCTGCAATTTCTTGATCAAAATGGGAATGACCAGAACTCTTGATTGCTTTCAGTCTGAAT
	A_33_P3368139	MAP3K1	2.34942e-18	4.92319e-20	2.41401	up	1.53749	up	1.42212	up	Homo sapiens mitogen-activated protein kinase kinase kinase 1, E3 ubiquitin protein ligase (MAP3K1), mRNA [NM_005921]	mitogen-activated protein kinase kinase kinase 1, E3 ubiquitin protein ligase	CCAGGGCTTAAGGGCTAACTTCTATTAGCACCTTACTGTGTAAGCAAATGTTACAAAAAA
	A_24_P940115	DLC1	2.37375e-18	4.97884e-20	2.45048	up	4.11886	up	1.97456	up	Homo sapiens DLC1 Rho GTPase activating protein (DLC1), transcript variant 1, mRNA [NM_182643]	DLC1 Rho GTPase activating protein	TTTGGATATCAGTGTTCCTCATGAAGATATACATGGATATTCAATTTTGATGGCTTCCAG
	A_33_P3341676	MEF2A	2.40441e-18	5.04789e-20	3.46968	up	2.3674	up	2.20349	up	Homo sapiens myocyte enhancer factor 2A (MEF2A), transcript variant 5, mRNA [NM_001171894]	myocyte enhancer factor 2A	CAAGCTGGACTTTGTTGCCATCCTTGAGATGAACCTTTTAAGAAAAATAAGTTAATCTCA
	A_23_P100711	PMP22	2.45372e-18	5.15625e-20	1.21782	up	-1.80191	down	-2.67743	down	Homo sapiens peripheral myelin protein 22 (PMP22), transcript variant 1, mRNA [NM_000304]	peripheral myelin protein 22	TGTGCCTCCAAGGACTGTCTGGCAATGACTTGTATTGGCCACCAACTGTAGATGTATATA
	A_33_P3363620	TMEM91	2.45533e-18	5.16449e-20	1.58919	up	2.44859	up	2.36686	up	Homo sapiens transmembrane protein 91 (TMEM91), transcript variant 5, mRNA [NM_001098824]	transmembrane protein 91	ATCCAGTGACAGTGACTCGGACTGGGATGGAGGCAGCCGTCTTTCACCATTTCTACCCCA
	A_23_P385034	E2F3	2.46187e-18	5.18309e-20	5.10455	up	3.32176	up	3.30975	up	Homo sapiens E2F transcription factor 3 (E2F3), transcript variant 1, mRNA [NM_001949]	E2F transcription factor 3	GGTGACCTGTTCTCTAGCTGTGATCTTACCACTTCAAATGGGTGTAATTTGAATAAATTT
	A_33_P3234277	HLA-DPA1	2.4705e-18	5.20613e-20	-2.8496	down	-3.73373	down	-3.94354	down	Homo sapiens major histocompatibility complex, class II, DP alpha 1 (HLA-DPA1), transcript variant 2, mRNA [NM_001242524]	major histocompatibility complex, class II, DP alpha 1	CTGAGGGTGTCGCTGAGAGCCTCTTCCTGCCCAGAACAGATTACAGCTTCCACAAGTTCC
	A_23_P336854		2.48064e-18	5.23239e-20	-2.0652	down	-2.14101	down	-2.28398	down	ribosomal protein L12 pseudogene 15 [Source:HGNC Symbol;Acc:HGNC:36619] [ENST00000433385]		ACAGTGGGAATATCACTTTTGATGAGATCGTCAACATTGCTCGACAGATGCGGCACCAAT
	A_23_P257538	RBBP9	2.50355e-18	5.28564e-20	-3.25199	down	-2.95166	down	-2.93262	down	Homo sapiens retinoblastoma binding protein 9 (RBBP9), mRNA [NM_006606]	retinoblastoma binding protein 9	GTAAAAGTGACTTAATTTGAAATTACTTCTGTTTGGCTAGTTTGCTTAGCTGATCACCAC
	A_23_P428992	LOC93622	2.57449e-18	5.44049e-20	-2.32945	down	-2.73918	down	-2.69501	down	Homo sapiens Morf4 family associated protein 1-like 1 pseudogene (LOC93622), non-coding RNA [NR_015433]	Morf4 family associated protein 1-like 1 pseudogene	ACCTACAATTGGGATGAGTTCTAGGTACATGTGTTTGCTGACTTTGGGGTAAACAACTTT
	A_23_P126803	ARPC5	2.64164e-18	5.5876e-20	2.58464	up	2.20437	up	2.20567	up	Homo sapiens actin related protein 2/3 complex, subunit 5, 16kDa (ARPC5), transcript variant 1, mRNA [NM_005717]	actin related protein 2/3 complex, subunit 5, 16kDa	TGCCCTGTGGGTAGCATCTGTTTCTCTCAGCTTTGCCTTCTTGCTTTTTCATATCTGTAA
	A_23_P329261	KCNJ2	2.68639e-18	5.68756e-20	5.54198	up	3.93068	up	4.52551	up	Homo sapiens potassium channel, inwardly rectifying subfamily J, member 2 (KCNJ2), mRNA [NM_000891]	potassium channel, inwardly rectifying subfamily J, member 2	AAGTTGAACAATCCTAGCCATTGACAATCGTGATAGTTATTATTTTCCCATTTGCTGTCT
	A_23_P124417	BUB1	2.69217e-18	5.70509e-20	1.09557	up	3.81305	up	2.32165	up	Homo sapiens BUB1 mitotic checkpoint serine/threonine kinase (BUB1), transcript variant 1, mRNA [NM_004336]	BUB1 mitotic checkpoint serine/threonine kinase	AGCCTGAAGGTCTTTTTAGAAGGCTTCCTCATTTGGATATGTGGAATGAATTTTTTCATG
	A_33_P3378659	TARP	2.69713e-18	5.72093e-20	-3.80824	down	-3.57725	down	-3.75881	down	Homo sapiens TCR gamma alternate reading frame protein (TARP), transcript variant 1, mRNA [NM_001003799]	TCR gamma alternate reading frame protein	AAACACCTCTGCATATTACATGTACCTCCTCCTGCTCCTCAAGAGTGTGGTCTATTTTGC
	A_33_P3305325		2.75281e-18	5.84752e-20	6.61903	up	4.85413	up	4.59877	up	capicua transcriptional repressor pseudogene 1 [Source:HGNC Symbol;Acc:HGNC:23936] [ENST00000416803]		TGAAGAGAAACTGACTGGGCTTTTGGGGTCGGGGAAGAGGGAACCCCACAGACATGGATC
	A_21_P0004868	lnc-HIST1H2AI-2	2.75281e-18	5.84988e-20	-3.2594	down	-2.51303	down	-2.38569	down	LNCipedia lincRNA (lnc-HIST1H2AI-2), lincRNA [lnc-HIST1H2AI-2:1]	lnc-HIST1H2AI-2:1	AGCTGTCAGAGTTTTAACATCTCAACCAAGCCACATGGATACTATTTCCTCAGAAAAGAC
	A_21_P0008548	LINC01550	2.75869e-18	5.86782e-20	-4.83066	down	-5.05661	down	-4.64373	down	long intergenic non-protein coding RNA 1550 [Source:HGNC Symbol;Acc:HGNC:20111] [ENST00000554822]	long intergenic non-protein coding RNA 1550	TCGTCTTTTCCTGCTGGTAAATAACACTGAAATTGTGGGAAGATGGGATGGTAAGAACAA
	A_23_P64372	TCN1	2.81027e-18	5.98307e-20	2.99879	up	6.71324	up	5.65596	up	Homo sapiens transcobalamin I (vitamin B12 binding protein, R binder family) (TCN1), mRNA [NM_001062]	transcobalamin I (vitamin B12 binding protein, R binder family)	CCAGAAAATGAATGATACTATATTTGGTTTCACAATGGAGGAGCGCTCATGGGGGCCCTA
	A_33_P3230948	SIGLEC16	2.83998e-18	6.05192e-20	2.4267	up	2.4706	up	2.24848	up	Homo sapiens sialic acid binding Ig-like lectin 16 (gene/pseudogene) (SIGLEC16), non-coding RNA [NR_002825]	sialic acid binding Ig-like lectin 16 (gene/pseudogene)	TCCTGCCTTTGCTTCAAGTTTTCCCGCCTTTCCAAATGGAACCAAAGTACTTCTTACATA
	A_33_P3380383	TIFAB	2.91897e-18	6.22599e-20	-1.63943	down	-2.74474	down	-4.17041	down	Homo sapiens TRAF-interacting protein with forkhead-associated domain, family member B (TIFAB), mRNA [NM_001099221]	TRAF-interacting protein with forkhead-associated domain, family member B	AACAATTACATTTGTGGTAGCTTGGGGTTACCTTCAGCTTTCAAATACCCACAGGCACGC
	A_33_P3340254	KMT2D	2.97109e-18	6.34303e-20	2.18338	up	1.783	up	1.77299	up	Homo sapiens lysine (K)-specific methyltransferase 2D (KMT2D), mRNA [NM_003482]	lysine (K)-specific methyltransferase 2D	GAGGCAAAGGGCAAGTTTTGGATTTTGCTTCTTCCAAGTTTGTTTTTAAACGACAAATAA
	A_21_P0000936	LOC101927851	2.99795e-18	6.40629e-20	4.64256	up	5.11433	up	6.69093	up	Homo sapiens uncharacterized LOC101927851 (LOC101927851), long non-coding RNA [NR_125945]	uncharacterized LOC101927851	CCTGGGGGAATGAATCTTTCAGAGCCAAACTAATGCTATGCATGCAGCTTATGATTTTTT
	A_21_P0010267	lnc-TPTE-3	3.00089e-18	6.41848e-20	46.9298	up	15.7302	up	13.1125	up	LNCipedia lincRNA (lnc-TPTE-3), lincRNA [lnc-TPTE-3:3]	lnc-TPTE-3:3	ATTCCAATTACAGGGCCTCGAAAGAGTCCTGTATTGTTATTTTTCGTCACTACCTCCCCG
	A_23_P16523	GDF15	3.01474e-18	6.45404e-20	3.93793	up	4.11584	up	3.60204	up	Homo sapiens growth differentiation factor 15 (GDF15), mRNA [NM_004864]	growth differentiation factor 15	TATTGGGGTGACCTTCTTGGGGACTCGGGGGCTGGTCTGATGGAACTGTGTATTTATTTA
	A_19_P00319534	PWAR5	3.11494e-18	6.67469e-20	-4.57342	down	-4.23485	down	-4.13581	down	Homo sapiens Prader Willi/Angelman region RNA 5 (PWAR5), long non-coding RNA [NR_022008]	Prader Willi/Angelman region RNA 5	TACCTACCCTTTTGGAGGAAGGAAAGGTAATCCTGTTTGTGTTTAATGTTAATTACTGAA
	A_24_P226008	MGLL	3.11824e-18	6.68792e-20	1.56816	up	3.15421	up	2.75213	up	Homo sapiens monoglyceride lipase (MGLL), transcript variant 1, mRNA [NM_007283]	monoglyceride lipase	GACAAGACTCTCAAGATTTATGAAGGTGCCTACCATGTTCTCCACAAGGAGCTTCCTGAA
	A_23_P118815	BIRC5	3.14325e-18	6.74775e-20	2.20254	up	5.26439	up	3.23713	up	Homo sapiens baculoviral IAP repeat containing 5 (BIRC5), transcript variant 3, mRNA [NM_001012271]	baculoviral IAP repeat containing 5	CTGGAAACCTCTGGAGGTCATCTCGGCTGTTCCTGAGAAATAAAAAGCCTGTCATTTCAA
	A_33_P3362359		3.15243e-18	6.77367e-20	-3.49274	down	-3.62683	down	-3.57265	down	T cell receptor beta variable 23/OR9-2 (non-functional) [Source:HGNC Symbol;Acc:HGNC:12202] [ENST00000390389]		TTCTTCAAGAAATGGAGATGCACAAGAAGCGATTCTCATCTCAATGCCCCAAGAACCCAC
	A_23_P35871	E2F8	3.18843e-18	6.8573e-20	2.41603	up	6.80146	up	4.35296	up	Homo sapiens E2F transcription factor 8 (E2F8), transcript variant 1, mRNA [NM_024680]	E2F transcription factor 8	ATCTGTTGTTGCAGTGTATCTTTTTGTAAAGTTTGCAACAATCCTCAATCAAGTCTATGG
	A_33_P3282051		3.28967e-18	7.08413e-20	3.5947	up	3.63817	up	4.60564	up	P88418_9HIV1 (P88418) Nef protein, partial (8%) [THC2541354]		TGAATGAATGAATACAATTGCCTGGGAGTCCGGGGAGCGTGAAGAGACCCGGGACCTCAG
	A_33_P3375541	CD3D	3.28967e-18	7.08801e-20	-3.43983	down	-3.82092	down	-3.45842	down	Homo sapiens CD3d molecule, delta (CD3-TCR complex) (CD3D), transcript variant 1, mRNA [NM_000732]	CD3d molecule, delta (CD3-TCR complex)	GCTTCTAGAAGCAGCCATTACCAACTGTACCTTCCCTTCTTGCTCAGCCAATAAATATAT
	A_23_P82523	ABCB1	3.31627e-18	7.15187e-20	-3.23558	down	-3.30661	down	-3.36355	down	Homo sapiens ATP-binding cassette, sub-family B (MDR/TAP), member 1 (ABCB1), mRNA [NM_000927]	ATP-binding cassette, sub-family B (MDR/TAP), member 1	GTCACTGCCTAATAAATATAGCACTAAAGTAGGAGACAAAGGAACTCAGCTCTCTGGTGG
	A_23_P62115	TIMP1	3.33658e-18	7.20225e-20	2.61169	up	3.09347	up	2.31943	up	Homo sapiens TIMP metallopeptidase inhibitor 1 (TIMP1), mRNA [NM_003254]	TIMP metallopeptidase inhibitor 1	CATGGAGAGTGTCTGCGGATACTTCCACAGGTCCCACAACCGCAGCGAGGAGTTTCTCAT
	A_21_P0012368	XLOC_l2_009639	3.37626e-18	7.29455e-20	-2.83187	down	-3.34976	down	-3.18747	down	BROAD Institute lincRNA (XLOC_l2_009639), lincRNA [TCONS_l2_00018461]		TAGAAGAAAATGAACATGGAAATAGGCAATTCACAGATAATGGCATTCATCTGGCGAATA
	A_32_P56525	TCAF1	3.46755e-18	7.49863e-20	-2.78477	down	-2.2723	down	-2.40788	down	Homo sapiens family with sequence similarity 115, member A (FAM115A), transcript variant 1, mRNA [NM_014719]	TRPM8 channel-associated factor 1	CTCTGAGGGAAACAAAGACAATGTGGAAAGAATAACTTAATTTTAATTCCATCTCCAGAG
	A_23_P80832	TMEM41A	3.47668e-18	7.52523e-20	-3.21537	down	-2.80648	down	-2.61807	down	Homo sapiens transmembrane protein 41A (TMEM41A), mRNA [NM_080652]	transmembrane protein 41A	CTGCTAATCATATACACAGTAGAAAAGACACATGATCTGGATTTTCTGTTTGCCACATCC
	A_33_P3271651	HLA-DPB1	3.54098e-18	7.67138e-20	-1.84572	down	-3.37058	down	-3.40412	down	Homo sapiens major histocompatibility complex, class II, DP beta 1 (HLA-DPB1), mRNA [NM_002121]	major histocompatibility complex, class II, DP beta 1	TGCTTGTCTGCCACGTGACGGATTTCTACCCAGGCAGCATTCAAGTCCGATGGTTCCTGA
	A_23_P216894	MAPKAP1	3.56887e-18	7.73884e-20	-4.39077	down	-3.35151	down	-3.81451	down	Homo sapiens mitogen-activated protein kinase associated protein 1 (MAPKAP1), transcript variant 1, mRNA [NM_001006617]	mitogen-activated protein kinase associated protein 1	AGGTCTTAGTCAATAGTTTTAACTATGCCATTTGTTTAAATGAGTGCATTTGCTTCGAGG
	A_23_P7144	CXCL1	3.57212e-18	7.75293e-20	8.18672	up	4.60797	up	5.03773	up	Homo sapiens chemokine (C-X-C motif) ligand 1 (melanoma growth stimulating activity, alpha) (CXCL1), transcript variant 1, mRNA [NM_001511]	chemokine (C-X-C motif) ligand 1 (melanoma growth stimulating activity, alpha)	CATACTGCCTTGTTTAATGGTAGTTTTACAGTGTTTCTGGCTTAGAACAAAGGGGCTTAA
	A_24_P402825	CACNA2D3	3.62532e-18	7.87554e-20	-1.55432	down	-3.52077	down	-3.56274	down	Homo sapiens calcium channel, voltage-dependent, alpha 2/delta subunit 3 (CACNA2D3), mRNA [NM_018398]	calcium channel, voltage-dependent, alpha 2/delta subunit 3	TTAAAAGAATTACCCTTTATGACTACCAAGCCATGTGTAGAGCCAACAAGGAAAGCAGCG
	A_21_P0014532		3.63054e-18	7.90118e-20	9.77662	up	5.53351	up	5.83374	up			AGGATGACGCCTCGTAGTCTGCGTTGAAGCCCGAGAACATCATCGTGGCGGTTAGGCAAA
	A_23_P137856	MUC1	3.63054e-18	7.89673e-20	2.46517	up	2.86034	up	2.68643	up	Homo sapiens mucin 1, cell surface associated (MUC1), transcript variant 1, mRNA [NM_002456]	mucin 1, cell surface associated	GTACCGATCGTAGCCCCTATGAGAAGGTTTCTGCAGGTAATGGTGGCAGCAGCCTCTCTT
	A_21_P0007916	DNAJC3-AS1	3.67106e-18	7.99661e-20	3.82822	up	2.90465	up	2.92857	up	DNAJC3 antisense RNA 1 (head to head) [Source:HGNC Symbol;Acc:HGNC:39808] [ENST00000499499]	DNAJC3 antisense RNA 1 (head to head)	ACAGAGATAACAGTTGCCTAAGCCAGCTCTTTTCTCCTCTTTTTGATGTTCTTCTTTTTC
	A_24_P418189		3.70612e-18	8.0803e-20	-3.97072	down	-2.99163	down	-3.58009	down	ribosomal protein S4X pseudogene 13 [Source:HGNC Symbol;Acc:HGNC:36522] [ENST00000483219]		GTACAAGTGGTGCAAAGTGAGAAAAATCTTTGTGGACACCAAAGGAATCCCTCATCTGGG
	A_33_P3296721		3.71119e-18	8.09865e-20	6.85264	up	5.60055	up	5.647	up			TATCATCATCCCAGAAGCTTGGAGGGAGCTCCTGGGGAAATCCAGCTTCACGGTCCCACA
	A_23_P202520	ABLIM1	3.71285e-18	8.10961e-20	-2.35375	down	-2.79173	down	-2.88395	down	Homo sapiens actin binding LIM protein 1 (ABLIM1), transcript variant 3, mRNA [NM_001003408]	actin binding LIM protein 1	TCACTGCACTCCTTTGTCATATACTCTGCATCACTGTCATACTCACAACTTCGTGAATAA
	A_23_P69109	PLSCR1	3.7319e-18	8.15856e-20	4.38073	up	2.67639	up	2.20683	up	Homo sapiens phospholipid scramblase 1 (PLSCR1), mRNA [NM_021105]	phospholipid scramblase 1	GTTTAGCTCTTACACTCTATCCTTCCTAGAAAATGGTAATTGAGATTACTCAGATATTAA
	A_33_P3358740	OSBPL7	3.7334e-18	8.1692e-20	-2.10141	down	-2.30394	down	-2.15685	down	Homo sapiens oxysterol binding protein-like 7 (OSBPL7), mRNA [NM_145798]	oxysterol binding protein-like 7	CTCTGATGAGGGCGAATTGCTATGACATTCCAAGCTCCAATAAAGACTGTCCCAGACTTT
	A_23_P93258	HIST1H3B	3.73971e-18	8.19039e-20	-2.54809	down	-1.00294	down	-1.04254	down	Homo sapiens histone cluster 1, H3b (HIST1H3B), mRNA [NM_003537]	histone cluster 1, H3b	GGCTCTTTGAGGACACAAACCTTTGCGCCATCCATGCTAAGCGAGTGACTATTATGCCCA
	A_23_P42897	MGAM	3.80949e-18	8.35073e-20	7.96756	up	8.03629	up	7.56565	up	Homo sapiens maltase-glucoamylase (alpha-glucosidase) (MGAM), mRNA [NM_004668]	maltase-glucoamylase (alpha-glucosidase)	CTCCTTCAACAATGACCCCACGACACAGGTATTAAGCATCGATGTGACTGACAGAAACAT
	A_33_P3325758	lnc-SPATC1-1	4.01448e-18	8.808e-20	5.24051	up	8.93471	up	5.95696	up	PREDICTED: Homo sapiens sphingomyelin phosphodiesterase 5 (SMPD5), mRNA [XM_001714032]	lnc-SPATC1-1:2	AGTACCGCCCTGGAGGGGCTCACGGACCACCGGGCAGTGCGCCTGCAGCTCCGAGTCTCA
	A_21_P0000855	LOC100506585	4.02711e-18	8.84363e-20	2.28461	up	1.93474	up	1.22584	up	Homo sapiens uncharacterized LOC100506585 (LOC100506585), long non-coding RNA [NR_038966]	uncharacterized LOC100506585	ACTCTCCTGCTTTAGAACAAGGACCTTTCCCTTTTGTGCATGAATACGCTCTCAGCAGAT
	A_24_P37264	RNF144A	4.06839e-18	8.94232e-20	-7.08901	down	-5.04752	down	-4.01846	down	Homo sapiens ring finger protein 144A (RNF144A), mRNA [NM_014746]	ring finger protein 144A	TCTTAAAGGGGAACAAATGATCTTGACAACATATTATTCCATAAAACCAGTTTAGGGCAC
	A_33_P3297444	ABTB1	4.101e-18	9.02206e-20	3.47841	up	2.74925	up	3.17365	up	Homo sapiens ankyrin repeat and BTB (POZ) domain containing 1 (ABTB1), transcript variant 1, mRNA [NM_032548]	ankyrin repeat and BTB (POZ) domain containing 1	TCCCATGCACAGGGCCATTCAGGAAGGGCTGGGGGAGTGTGTGTGGCAATAAAGCTTGAA
	A_23_P212089	NFKBIZ	4.14011e-18	9.11628e-20	6.15293	up	3.67014	up	3.41971	up	Homo sapiens nuclear factor of kappa light polypeptide gene enhancer in B-cells inhibitor, zeta (NFKBIZ), transcript variant 1, mRNA [NM_031419]	nuclear factor of kappa light polypeptide gene enhancer in B-cells inhibitor, zeta	TAGATAAAGCAGATGGGGAGTTACGGAGTTGTTCCTTTACTGGCTGAAAGATATATTCGA
	A_23_P99661	ARHGEF40	4.19537e-18	9.24621e-20	4.37061	up	2.61587	up	3.16111	up	Homo sapiens Rho guanine nucleotide exchange factor (GEF) 40 (ARHGEF40), transcript variant 1, mRNA [NM_018071]	Rho guanine nucleotide exchange factor (GEF) 40	AACAATAGGAGGGTGTGACAGGGGAACCGTAGACTTTATATATGTAATTACTGTTATTAT
	A_23_P5392	TP53I3	4.22607e-18	9.3222e-20	2.19406	up	3.15767	up	2.70357	up	Homo sapiens tumor protein p53 inducible protein 3 (TP53I3), transcript variant 1, mRNA [NM_004881]	tumor protein p53 inducible protein 3	AGGAAGTCTGATCACCAGTTTGCTGAGGTCTAGGGACAATAAGTACAAGCAAATGCTGGT
	A_32_P203430	ZNF30	4.30455e-18	9.50382e-20	-3.37563	down	-3.57943	down	-3.41718	down	Homo sapiens zinc finger protein 30 (ZNF30), transcript variant 3, mRNA [NM_194325]	zinc finger protein 30	GGAATTTATGCTGGTAGGAAACTTTCAAATGTGAAGAATATTGGCAGGTCTATTCTCATC
	A_33_P3395605	TMEM119	4.41091e-18	9.75069e-20	6.76316	up	6.23068	up	8.19624	up	Homo sapiens transmembrane protein 119 (TMEM119), mRNA [NM_181724]	transmembrane protein 119	ACCTCTGCACAGCTCTCCAGGTGCTGAGATATAATGCACCAGCACAATAAACCTTTATTC
	A_21_P0002454	lnc-RAB1A-1	4.41091e-18	9.75602e-20	-3.08224	down	-2.32819	down	-2.81761	down	LNCipedia lincRNA (lnc-RAB1A-1), lincRNA [lnc-RAB1A-1:3]	lnc-RAB1A-1:3	AGGCTCTCCGAACGCCTTTCACTGTGTTTCTGTTTACATTCGCGTCTGCAAGACCCGGCG
	A_23_P345065	SCLY	4.41116e-18	9.76528e-20	-1.87405	down	-1.95533	down	-1.85312	down	Homo sapiens selenocysteine lyase (SCLY), mRNA [NM_016510]	selenocysteine lyase	ATCGGATCATCCCTGACTCAGCTTATACCTTAATTTTATTTGCAGAGGATTCTTTTCTCA
	A_33_P3233565	UROS	4.4788e-18	9.92386e-20	-3.44649	down	-2.72522	down	-2.84428	down	Homo sapiens uroporphyrinogen III synthase (UROS), mRNA [NM_000375]	uroporphyrinogen III synthase	CTGGATACAGAAGGAGAAACCTGTGGAAATGCAGAAAAGCTTGCAGAATATATTTGTTCC
	A_33_P3283619	SH2D1A	4.60101e-18	1.02037e-19	-4.36216	down	-4.72	down	-3.73037	down	Homo sapiens SH2 domain containing 1A (SH2D1A), transcript variant 2, mRNA [NM_001114937]	SH2 domain containing 1A	TATCATGGCAAAATCAGCAGGGAAACCGGCGAGAAGCTCCTGCTTGCCACTGGGCTGGAT
	A_33_P3415663	MBLAC2	4.60232e-18	1.02157e-19	-2.2493	down	-2.84578	down	-2.95936	down	Homo sapiens metallo-beta-lactamase domain containing 2 (MBLAC2), mRNA [NM_203406]	metallo-beta-lactamase domain containing 2	CTTTCAACTGAGAAGCCTAAAACAAACAAAAACCTTGTGTGTTATCCTGATATAGTTGAC
	A_24_P125434	TXNDC2	4.61148e-18	1.02451e-19	3.16023	up	2.98366	up	3.33392	up	Homo sapiens thioredoxin domain containing 2 (spermatozoa) (TXNDC2), transcript variant 1, mRNA [NM_032243]	thioredoxin domain containing 2 (spermatozoa)	GACGCTGACAACTGTGAGGAGGTGGTGAGAGAGTGCGCCATCATGTGTGTCCCAACCTTT
	A_23_P35205	RCAN3	4.6944e-18	1.04386e-19	-2.51948	down	-2.81639	down	-2.93764	down	Homo sapiens RCAN family member 3 (RCAN3), transcript variant 1, mRNA [NM_013441]	RCAN family member 3	CCACTGCTAGGCCTCAATGTAAATTCAGTTGAAATTTGCAATTCTATCAGCAATTTAATG
	A_33_P3789056	PIK3CD-AS1	4.70761e-18	1.04772e-19	2.86638	up	2.90029	up	2.42476	up	Homo sapiens PIK3CD antisense RNA 1 (PIK3CD-AS1), long non-coding RNA [NR_027045]	PIK3CD antisense RNA 1	TCGTCCCAGTTCCCCTCTTCTCTACCTCAAAGGAGGAGGTGCAAATGAGGAAGCCTAAAT
	A_33_P3270966		4.76369e-18	1.06114e-19	-2.4615	down	-2.26839	down	-2.65939	down	ribosomal protein S4X pseudogene 8 [Source:HGNC Symbol;Acc:HGNC:36683] [ENST00000402039]		TATTGGCAAGAGCAATAAACCATGGATTTCTCTTTCCCAAGGACAGGATATCCGCCTCAC
	A_33_P3239134	POM121L4P	4.79826e-18	1.06979e-19	5.875	up	4.70666	up	4.7945	up	Homo sapiens POM121 transmembrane nucleoporin-like 4 pseudogene (POM121L4P), non-coding RNA [NR_024592]	POM121 transmembrane nucleoporin-like 4 pseudogene	ATTGGGGTCACTATTGGAGTGGATGGAGGCCCTTCACATTTCTGGGCCTCAGCCACAGCT
	A_33_P3271684	TMEM236	4.94129e-18	1.10265e-19	3.65218	up	3.62021	up	3.93312	up	Homo sapiens transmembrane protein 236 (TMEM236), mRNA [NM_001098844]	transmembrane protein 236	GCAGGGCCTTACATAGTGAATATATCAATAGTTGTTCACAAAAAGAGCAATATACCACTT
	A_23_P5903	SLCO4A1	4.97085e-18	1.11082e-19	3.88934	up	8.00871	up	5.0028	up	Homo sapiens solute carrier organic anion transporter family, member 4A1 (SLCO4A1), mRNA [NM_016354]	solute carrier organic anion transporter family, member 4A1	TATTTATGGACACACAGTTTGCATCAGAACGTGTTTATAGAATGTGTTTTATACCCGATC
	A_21_P0014924	CHRM3-AS2	4.97085e-18	1.11121e-19	-5.74449	down	-5.50865	down	-5.02814	down	Homo sapiens CHRM3 antisense RNA 2 (CHRM3-AS2), long non-coding RNA [NR_103776]	CHRM3 antisense RNA 2	TCAGTCTGTGCATAAGCATATGTTTAAATCTACCAGGAGAAATGTCTGGAATCTTTTTGG
	A_33_P3247022	CCNE2	5.0921e-18	1.13932e-19	1.78802	up	3.38068	up	2.74741	up	Homo sapiens cyclin E2 (CCNE2), mRNA [NM_057749]	cyclin E2	GTGAATCTCTTCTCCCTTTGAAGAAACTATACATTTATTGTTACGGTATGAAGTCTTCTG
	A_23_P151805	FBLN5	5.1397e-18	1.15098e-19	-4.74989	down	-4.65504	down	-4.94104	down	Homo sapiens fibulin 5 (FBLN5), mRNA [NM_006329]	fibulin 5	GGGAACCCTGGGAGTAGCTAGTTTGCTTTTTGCGTACACAGAGAAGGCTATGTAAACAAA
	A_33_P3347413	PBXIP1	5.14212e-18	1.15254e-19	-3.34247	down	-2.64936	down	-2.24795	down	Homo sapiens pre-B-cell leukemia homeobox interacting protein 1 (PBXIP1), mRNA [NM_020524]	pre-B-cell leukemia homeobox interacting protein 1	TAGATGACTTTGAGGACTTCATCTTCAGCCACTTCTTTGGAGACAAAGCACTGAAGAAGA
	A_21_P0007825	lnc-DERA-1	5.2338e-18	1.17412e-19	4.36846	up	2.49304	up	2.46825	up	LNCipedia lincRNA (lnc-DERA-1), lincRNA [lnc-DERA-1:1]	lnc-DERA-1:1	ATTGGTCTCAAGACTGGAACTGGTACTCATTGTCTCTCTTCTCTCCTATCCTCTGCTACA
	A_33_P3291484	ST8SIA4	5.28562e-18	1.18678e-19	3.77985	up	2.30249	up	2.24996	up	Homo sapiens ST8 alpha-N-acetyl-neuraminide alpha-2,8-sialyltransferase 4 (ST8SIA4), transcript variant 1, mRNA [NM_005668]	ST8 alpha-N-acetyl-neuraminide alpha-2,8-sialyltransferase 4	GTTCAAGTTCATTCTGTTCAACACTGTTTTCTTATTGTTTGTGTATAGCAACCGGGTATT
	A_33_P3323722	ARL4C	5.40671e-18	1.21504e-19	-3.11476	down	-3.55984	down	-3.23118	down	Homo sapiens ADP-ribosylation factor-like 4C (ARL4C), transcript variant 1, mRNA [NM_001282431]	ADP-ribosylation factor-like 4C	CATCATCCTTCTCTTTTGTTTCCATAGCCTTTTATAATGCATATATGATGCTGTGAACAG
	A_33_P3372667	lnc-VIP-1	5.50257e-18	1.23767e-19	-2.08864	down	-1.90001	down	-2.14218	down	LNCipedia lincRNA (lnc-VIP-1), lincRNA [lnc-VIP-1:1]	lnc-VIP-1:1	CTAGGACATCATAGCTCTCTTTCATCCCTCTTAAAAGTTAATACCATTATCAGTTAACAG
	A_24_P109071	KIF27	5.50314e-18	1.23888e-19	3.79922	up	3.24451	up	3.82493	up	Homo sapiens kinesin family member 27 (KIF27), transcript variant 1, mRNA [NM_017576]	kinesin family member 27	AATAAAGGAAGAAGGGGAGGAAGGAATCCCTAATTCTTTTATATGCTATAGATGTGTACA
	A_32_P919718	TMEM105	5.5366e-18	1.2475e-19	4.10169	up	2.79409	up	2.93433	up	Homo sapiens transmembrane protein 105 (TMEM105), mRNA [NM_178520]	transmembrane protein 105	CATGTGTGGCCTGGGTTTGGAGCTCAGCACCCTGCGGGAATTCTATTAAATCTCCGATTT
	A_21_P0014825	ZNF341-AS1	5.54065e-18	1.24951e-19	2.13783	up	3.10213	up	3.16348	up	Homo sapiens ZNF341 antisense RNA 1 (ZNF341-AS1), long non-coding RNA [NR_110623]	ZNF341 antisense RNA 1	GATACGGAAATGCTGGTCCCTACAATAGAATGCTCTGTGGTCATTAAAAAGATTAAAAAG
	A_19_P00320866	LINC01503	5.76143e-18	1.30043e-19	2.95805	up	2.52343	up	2.39543	up	Homo sapiens long intergenic non-protein coding RNA 1503 (LINC01503), transcript variant 1, long non-coding RNA [NR_120685]	long intergenic non-protein coding RNA 1503	AGAATGCGCTGGGTGGTGAGCCTGGGGACGAATGCAGAGCCCTAGGTCTCCTCTCCAGAA
	A_21_P0013940		5.78633e-18	1.3072e-19	4.07026	up	3.34746	up	3.05523	up	Homo sapiens cDNA FLJ59086 complete cds. [AK304854]		AATGTCCGTGACTACTTGTGTTGCGTTGCTGGAATTTCCAGCCTTCTCAATAAGAAGGCA
	A_33_P3245908	C10orf128	5.9634e-18	1.34837e-19	-3.9298	down	-2.30514	down	-1.56426	down	Homo sapiens chromosome 10 open reading frame 128 (C10orf128), transcript variant 5, mRNA [NM_001288743]	chromosome 10 open reading frame 128	CACAGGTGATTGAGCTGTAGGTGAGCAGTGACGTGAAGAGGGGTTCTAGCCCCGTGGAAA
	A_33_P3286218	DLEU2L	6.12479e-18	1.38607e-19	2.11663	up	2.70723	up	3.17753	up	Homo sapiens deleted in lymphocytic leukemia 2-like (DLEU2L), non-coding RNA [NR_002771]	deleted in lymphocytic leukemia 2-like	CCTTTCTTACCTATTTGATGAAGATGTCTTTTGAAAGGTGTACTGCAAGGAACAAAATGT
	A_33_P3355474		6.18106e-18	1.40002e-19	-3.58917	down	-2.96489	down	-2.94648	down	Q6PII7_HUMAN (Q6PII7) GATS protein (Fragment), partial (10%) [THC2581562]		ACTGAAGAACTTGCACCTGGATGGATGGACAGACAGACACAGAATATCTCATTAGTCCAG
	A_23_P126135	MFN2	6.19653e-18	1.40475e-19	2.78276	up	2.33686	up	2.18247	up	Homo sapiens mitofusin 2 (MFN2), transcript variant 1, mRNA [NM_014874]	mitofusin 2	TTGTTTTTATGTTCATTTGCTGGAGCGCAAGACGTGCTGACACAGTGAGTTTTCTCTGAT
	A_24_P413884	CENPA	6.23622e-18	1.41498e-19	1.84349	up	4.58047	up	3.13511	up	Homo sapiens centromere protein A (CENPA), transcript variant 1, mRNA [NM_001809]	centromere protein A	TAGTTTGTGAGTTACTCATGTGACTATTTGAGGATTTTGAAAACATCAGATTTGCTGTGG
	A_24_P252497	TRIB1	6.41258e-18	1.45626e-19	5.09818	up	4.47338	up	3.98024	up	Homo sapiens tribbles pseudokinase 1 (TRIB1), transcript variant 1, mRNA [NM_025195]	tribbles pseudokinase 1	ACTAACGCTCTCGTGGTTGCTCGACTGTTGTATCTGTGATACATTATCCGACTAAGGACT
	A_23_P419150	VENTX	6.44879e-18	1.46575e-19	2.55954	up	1.24659	up	1.33424	up	Homo sapiens VENT homeobox (VENTX), mRNA [NM_014468]	VENT homeobox	GTAGGGCTTTCGGCGTACGATAAAAGGATCATTTGTTTTTTAAAAGGGGTTGGAAAAACT
	A_23_P379630	SLC38A10	6.45396e-18	1.46921e-19	2.2272	up	2.40422	up	2.09612	up	Homo sapiens solute carrier family 38, member 10 (SLC38A10), transcript variant 2, mRNA [NM_138570]	solute carrier family 38, member 10	TCAGCAGCTTGCTTTCTGGGAACCTTTTATCTGCCTTACTCCCCTTTAAACACCTGCGGC
	A_21_P0011655	PKD1P6	6.45396e-18	1.46947e-19	-3.23121	down	-2.36353	down	-2.28591	down	Homo sapiens polycystic kidney disease 1 (autosomal dominant) pseudogene 6 (PKD1P6), non-coding RNA [NR_123722]	polycystic kidney disease 1 (autosomal dominant) pseudogene 6	ACTTACAATTTGGTATTACCTGGGAGTGAAAAGAAATATTACAGCCATGCCCAACTGACT
	A_24_P555510	PCM1	6.58852e-18	1.50141e-19	-1.71341	down	-2.10302	down	-2.14281	down	Homo sapiens pericentriolar material 1 (PCM1), mRNA [NM_006197]	pericentriolar material 1	TAGAGGGAGAAAAGTTCAAAATGAGTGAGAGAGAACTTTATGCAGGTTGAGATAATGCCT
	A_32_P175301	DENND3	6.59551e-18	1.5043e-19	4.0333	up	3.08717	up	3.48234	up	Homo sapiens DENN/MADD domain containing 3 (DENND3), mRNA [NM_014957]	DENN/MADD domain containing 3	GGGCACCTTCCCACTTTCTAGCTCTGGAGAGGTTGGATTTTGCTTTTGTAAACACATGAA
	A_33_P3266828	TMEM8B	6.64555e-18	1.51702e-19	-1.1092	down	-2.2192	down	-1.70195	down	Homo sapiens transmembrane protein 8B (TMEM8B), transcript variant 3, mRNA [NM_016446]	transmembrane protein 8B	CTTCCCAAACTGTCATGCATAGATAATGGTCATTTTTGTAAGACACATTGGAGTAAATGA
	A_23_P364355		6.67132e-18	1.52422e-19	-2.83448	down	-3.41528	down	-3.05944	down	T cell receptor beta variable 7-3 [Source:HGNC Symbol;Acc:HGNC:12237] [ENST00000390361]		GTCTCCCAGACCCCCAGTAACAAGGTCACAGAGAAGGGAAAAGATGTAGAGCTCAGGTGT
	A_33_P3252394	GADD45G	6.70385e-18	1.53297e-19	4.42771	up	3.8306	up	4.39967	up	Homo sapiens growth arrest and DNA-damage-inducible, gamma (GADD45G), mRNA [NM_006705]	growth arrest and DNA-damage-inducible, gamma	GGCAATGCTTCGTTTTCTAAAGGATGCTGCTGTTGAAGCTTTGAATTTTACAATAAACTT
	A_23_P203743	GAB2	7.19754e-18	1.64729e-19	2.60479	up	1.82195	up	2.2696	up	Homo sapiens GRB2-associated binding protein 2 (GAB2), transcript variant 2, mRNA [NM_012296]	GRB2-associated binding protein 2	CCCAAGAGATCCAGGCTGTCATGTGATTTATGGTGGCATGTGTTGTGTATTTGTTGGCTA
	A_23_P359870		7.23647e-18	1.65762e-19	-6.83724	down	-4.44153	down	-3.96202	down	Homo sapiens mRNA for hypothetical protein (C8ORF16). [AJ312026]		CTGAGGTTATAATTTTCACTTAACATTGTCGAGTTGGCATTTTGGTTTTAGTCCAATGGT
	A_21_P0011903	LOC101929567	7.31878e-18	1.67792e-19	1.96411	up	2.61078	up	2.8533	up	Homo sapiens uncharacterized LOC101929567 (LOC101929567), long non-coding RNA [NR_110257]	uncharacterized LOC101929567	AAGAGTGAATGAGCTCCTACTTCGCGAAAGCAAAACAAACTAAACGCATCAACCACGACC
	A_23_P26928	CCDC103	7.34728e-18	1.6859e-19	3.4676	up	2.05293	up	1.5447	up	family with sequence similarity 187, member A [Source:HGNC Symbol;Acc:HGNC:35153] [ENST00000331733]	coiled-coil domain containing 103	GGGCACATGTGTTTCCTGACTTCACATTTAGGTCAGAGAAGGAAAGTGTGAACTCAGATT
	A_33_P3225843	CCDC149	7.37152e-18	1.69292e-19	2.41946	up	1.13282	up	1.29534	up	Homo sapiens coiled-coil domain containing 149 (CCDC149), transcript variant 1, mRNA [NM_173463]	coiled-coil domain containing 149	TGCAAACTGTGAATATTCTGATGATGCCAGTACAGTTTGATTTATTAAATGTAGGTCCTC
	A_21_P0002422	LINC00211	7.41866e-18	1.7052e-19	3.52786	up	2.09255	up	2.50502	up	Homo sapiens long intergenic non-protein coding RNA 211 (LINC00211), transcript variant 1, long non-coding RNA [NR_110011]	long intergenic non-protein coding RNA 211	CACTCACTGTCTTATATTGGGTTTTCATTGCATGTAGGATAATTCTTTGTCAATGGTAGT
	A_33_P3316310	MTERF4	7.611e-18	1.75091e-19	-2.56854	down	-2.44106	down	-2.30053	down	Homo sapiens mitochondrial transcription termination factor 4 (MTERF4), transcript variant 1, mRNA [NM_182501]	mitochondrial transcription termination factor 4	TTAATGAATTGCTCAGTGTACGGCGAGGTGCCAGTCTTCAACAGTTGCTGGACATCATTT
	A_33_P3314850		7.70894e-18	1.77496e-19	-3.38123	down	-4.05187	down	-3.54953	down	T cell receptor beta variable 6-4 [Source:HGNC Symbol;Acc:HGNC:12229] [ENST00000390360]		TATAGACAAGATCTAGGACTGGGGCTAAGGCTCATCCATTATTCAAATACTGCAGGTACC
	A_23_P57588	GTSE1	7.73385e-18	1.78252e-19	1.17172	up	2.91415	up	2.14164	up	Homo sapiens G-2 and S-phase expressed 1 (GTSE1), mRNA [NM_016426]	G-2 and S-phase expressed 1	CTCTGATCGACCTCATGACAAACACTCCAGACATGAATAAAAATGTGGCCAAACCTTCAC
	A_24_P754803		7.73385e-18	1.78375e-19	-1.81144	down	-1.99331	down	-2.17792	down	ribosomal protein L10 [Source:HGNC Symbol;Acc:HGNC:10298] [ENST00000436473]		ATTGGCCAAGTTATCATGTCCATCCGCACCAAGCTGCAGAACAAGGAGCATGTGATTGAG
	A_23_P8834	EPHX2	7.76002e-18	1.79132e-19	-3.5144	down	-3.32647	down	-3.26412	down	Homo sapiens epoxide hydrolase 2, cytoplasmic (EPHX2), transcript variant 1, mRNA [NM_001979]	epoxide hydrolase 2, cytoplasmic	TGGCCTTACACACATCTTGCATGGATGGCAGCATTGTTCTGAAGGGGTTTGCAGAAAAAA
	A_33_P3385785	S100A12	7.80327e-18	1.80284e-19	3.60336	up	3.96253	up	3.39264	up	Homo sapiens S100 calcium binding protein A12 (S100A12), mRNA [NM_005621]	S100 calcium binding protein A12	AGGCCTGGATGCTAATCAAGATGAACAGGTCGACTTTCAAGAATTCATATCCCTGGTAGC
	A_24_P323084	LINC00482	7.89724e-18	1.8261e-19	5.89264	up	5.08108	up	5.28979	up	Homo sapiens long intergenic non-protein coding RNA 482 (LINC00482), long non-coding RNA [NR_038080]	long intergenic non-protein coding RNA 482	GGCCGCAGGCTGTGCCCCGGCTGTGGCGTTAAGAAGGGCTATGGATCTAAATAAAATCCA
	A_33_P3773261	NQO2	7.99618e-18	1.85056e-19	2.90381	up	4.21322	up	3.48416	up	NAD(P)H dehydrogenase, quinone 2 [Source:HGNC Symbol;Acc:HGNC:7856] [ENST00000380455]	NAD(P)H dehydrogenase, quinone 2	GTGTTACTAAGATCATAAAAATGAAGGAAAATGCCCAAGCATATCCCCAACCCCTCACCC
	A_33_P3379001	UNC5A	8.00437e-18	1.85403e-19	8.01444	up	6.3063	up	4.61907	up	Homo sapiens unc-5 homolog A (C. elegans) (UNC5A), mRNA [NM_133369]	unc-5 homolog A (C. elegans)	TGTACACCTGAGGCTGCTCACGTCTCACGCCCAGTGTTGGTGCACATTTGCCTCTCACAT
	A_33_P3382147	STARD13	8.10518e-18	1.87898e-19	7.47043	up	7.3488	up	7.40069	up	StAR-related lipid transfer (START) domain containing 13 [Source:HGNC Symbol;Acc:HGNC:19164] [ENST00000487412]	StAR-related lipid transfer (START) domain containing 13	CTGGTTGGCATCTGTCTCTGAGGAATATATAATTTCAGTGAAGAATGTTCTCATTTTTAG
	A_33_P3235213	TIGIT	8.15757e-18	1.89273e-19	-4.14275	down	-3.90457	down	-3.61142	down	Homo sapiens T cell immunoreceptor with Ig and ITIM domains (TIGIT), mRNA [NM_173799]	T cell immunoreceptor with Ig and ITIM domains	CACACCTACCCTGATGGGACGTACACTGGGAGAATCTTCCTGGAGGTCCTAGAAAGCTCA
	A_21_P0000740	HIVEP3	8.52794e-18	1.98035e-19	-4.1693	down	-3.21936	down	-3.26146	down	Homo sapiens human immunodeficiency virus type I enhancer binding protein 3 (HIVEP3), transcript variant 3, non-coding RNA [NR_038260]	human immunodeficiency virus type I enhancer binding protein 3	AGCTACTTCCAAATCCTACTTACCCCAAAGACAAGATGATCATTTAGTCATATAGTATCA
	A_21_P0013392		8.58938e-18	1.99631e-19	4.56739	up	16.0377	up	7.62162	up			CCAGCTGTGTGTACACAGATTGGTGAATTCAAGCCTCTGATCTAGGATCTGAAATAAAAA
	A_21_P0001481	lnc-C1orf201-3	8.61146e-18	2.00336e-19	-4.55863	down	-3.97053	down	-4.09394	down	LNCipedia lincRNA (lnc-C1orf201-3), lincRNA [lnc-C1orf201-3:2]	lnc-C1orf201-3:2	AAAGTACTGCACTTCACCTCTATCTCCTGGTATCTCTTCAATTCAAACACACCATTAATG
	A_23_P112482	AQP3	8.61146e-18	2.00484e-19	-8.19728	down	-4.90843	down	-4.52805	down	Homo sapiens aquaporin 3 (Gill blood group) (AQP3), mRNA [NM_004925]	aquaporin 3 (Gill blood group)	AATTTGGGTCAATACATCCTTTTGTCTCCCAAGGGAAGAGAATGGGCAGCAGGTATGTGT
	A_33_P3381671		8.66407e-18	2.01879e-19	5.36888	up	4.32399	up	5.46814	up			AGAACTACAGGAAAGGAGTAGTATCTCTGAATTATCGTGTGGAAGGTCGCTTGTCTAGCC
	A_24_P44596	MON1B	8.89745e-18	2.07492e-19	2.48951	up	1.87776	up	1.88944	up	Homo sapiens MON1 secretory trafficking family member B (MON1B), transcript variant 1, mRNA [NM_014940]	MON1 secretory trafficking family member B	ACCAGGGCAGAAAGGAGGGAGGATTCGTCCCATTACAATAATGAAATAATGATATTCTAA
	A_33_P3328716	CCDC13	8.9059e-18	2.07865e-19	5.19759	up	3.60986	up	4.29067	up	Homo sapiens coiled-coil domain containing 13 (CCDC13), mRNA [NM_144719]	coiled-coil domain containing 13	ACTTCCTCAGGTGCAGACCCTTGGACTTGTAATAATAATAAGTATTTTCATAATCACTGC
	A_23_P118722	ASGR1	8.99886e-18	2.10212e-19	7.00942	up	2.79059	up	2.60467	up	Homo sapiens asialoglycoprotein receptor 1 (ASGR1), transcript variant 1, mRNA [NM_001671]	asialoglycoprotein receptor 1	TGAGGAGCTTGAAACCCGTGGCGCTTTCTGCAGTTTGCAGGTTATCATTGTGAACTTTTT
	A_19_P00317639	LINC00861	9.02431e-18	2.10985e-19	-3.48951	down	-4.3598	down	-3.64881	down	long intergenic non-protein coding RNA 861 [Source:HGNC Symbol;Acc:HGNC:45133] [ENST00000518964]	long intergenic non-protein coding RNA 861	TCAAGGACTTCACAGTCTACAGGAAAGGGATATAGTTAAACAAATAACTGCAGAATTGGA
	A_33_P3336992	MRPS18B	9.14265e-18	2.13932e-19	-4.86196	down	-3.27971	down	-3.36791	down	Homo sapiens mitochondrial ribosomal protein S18B (MRPS18B), mRNA [NM_014046]	mitochondrial ribosomal protein S18B	TTGTCCTCAGTTCCCATTTCTCCTTATAAGGATGAGCCCTGGAAATATCTGGAATCAGAA
	A_23_P149200	CDC20	9.22464e-18	2.16032e-19	3.24887	up	4.8395	up	3.64854	up	Homo sapiens cell division cycle 20 (CDC20), mRNA [NM_001255]	cell division cycle 20	GGTAATGATAACTTGGTCAATGTGTGGCCTAGTGCTCCTGGAGAGGGTGGCTGGGTTCCT
	A_24_P333019	RNF24	1.00714e-17	2.3606e-19	3.89036	up	3.00074	up	3.47	up	Homo sapiens ring finger protein 24 (RNF24), transcript variant 1, mRNA [NM_007219]	ring finger protein 24	AGAAACTTCATGAGGGTCTCTTACTAACTCCATTACACTCTCTCTCCTGGAGCCTCATCT
	A_33_P3344406	MEF2B	1.01823e-17	2.38861e-19	2.57337	up	3.28952	up	3.24349	up	Homo sapiens myocyte enhancer factor 2B (MEF2B), mRNA [NM_001145785]	myocyte enhancer factor 2B	AAGACCCAACAGTGACGCCCCCCTCCGCGGTGGGGGCTTGGAGGTGGGCGGCTGGACTCA
	A_24_P183094	ATP13A3	1.01844e-17	2.3911e-19	3.42291	up	2.19991	up	1.78432	up	Homo sapiens ATPase type 13A3 (ATP13A3), mRNA [NM_024524]	ATPase type 13A3	AAATTGTATTGCTGCTCAAGAATGGTACCCTCTTGTCAAAAAGGCATACATTCATAATTG
	A_24_P71700	ZBTB47	1.02266e-17	2.40303e-19	2.45258	up	1.91751	up	1.84216	up	Homo sapiens zinc finger and BTB domain containing 47 (ZBTB47), mRNA [NM_145166]	zinc finger and BTB domain containing 47	GTGGCAGAATGGCCATGCCCAGGTGTGTGTTGAGACCATTGACAACTGCTCGTGTACAGG
	A_24_P59667	JAK3	1.02575e-17	2.41275e-19	3.30178	up	3.28721	up	2.90128	up	Homo sapiens Janus kinase 3 (JAK3), mRNA [NM_000215]	Janus kinase 3	TGAGGCCTCAGTACAGAGGGGGCTCTGGAAATGTTTGTTGACTGAATAAAGGAATTCAGT
	A_21_P0014714	lnc-EIF4E3-1	1.02575e-17	2.4153e-19	2.50213	up	2.50047	up	2.88619	up	Homo sapiens cDNA FLJ12191 fis, clone MAMMA1000843. [AK022253]	lnc-EIF4E3-1:1	CCCTTGGATTGGGGAGAGTCTTACAATGAATAACTCAGAAAAAAGTTTTCAAAATAATCC
	A_33_P3420167		1.02575e-17	2.41708e-19	-1.688	down	-2.15724	down	-2.12107	down	GB		AATTTATGGACAACACGAGCCGCTCCAGCATCCGCAGTGTAAAAGGCCCCGTGTGTGAGG
	A_23_P88095	TBC1D4	1.02575e-17	2.41839e-19	-3.48526	down	-4.17971	down	-3.89407	down	Homo sapiens TBC1 domain family, member 4 (TBC1D4), transcript variant 1, mRNA [NM_014832]	TBC1 domain family, member 4	ATGACATTCACGCATGCTGGGTATAGGCAAGGAAAGTAATTTTCAAAGTACATTTGCAGT
	A_19_P00805625	LINC00963	1.04584e-17	2.46782e-19	2.71626	up	1.60737	up	2.09278	up	long intergenic non-protein coding RNA 963 [Source:HGNC Symbol;Acc:HGNC:48716] [ENST00000444184]	long intergenic non-protein coding RNA 963	CATGATAGAAGACAGGCAGGGATGCCACAATCATAACCATGGCAAAGACCAGGATCAGAA
	A_33_P3271990	DGAT1	1.05345e-17	2.48785e-19	3.18706	up	2.46518	up	2.41545	up	Homo sapiens diacylglycerol O-acyltransferase 1 (DGAT1), mRNA [NM_012079]	diacylglycerol O-acyltransferase 1	TCTCTGTGGAGCGGGGAACGGGACAGTTGTGTAAAAATCCAAAATACAATTCTGACTATG
	A_33_P3351101	TYSND1	1.06486e-17	2.51688e-19	-2.56417	down	-3.09577	down	-2.62009	down	Homo sapiens trypsin domain containing 1 (TYSND1), transcript variant 1, mRNA [NM_173555]	trypsin domain containing 1	TCTCATAGTCCTTGTTCCAGTCTTTGTTAGAATACTGGGTATGTTAGGGCTTGGGACAGG
	A_24_P379693	DNPEP	1.08314e-17	2.56223e-19	-2.63703	down	-2.86233	down	-2.53777	down	Homo sapiens aspartyl aminopeptidase (DNPEP), mRNA [NM_012100]	aspartyl aminopeptidase	GTTTTAAATCTGGTTTTAAATCTCTTCTCTGTCTCAAGTCCATGTCTGAAGTGGGTGAAG
	A_24_P119545	ITPKB	1.10986e-17	2.62763e-19	-4.44824	down	-3.92283	down	-3.28218	down	inositol-trisphosphate 3-kinase B [Source:HGNC Symbol;Acc:HGNC:6179] [ENST00000366784]	inositol-trisphosphate 3-kinase B	TGTAATTTGTAATTCTTTAGTTTTCAAGAGGGACTCTACATGTTTCCTTGTGATGATGGC
	A_23_P419714	BTBD11	1.12553e-17	2.66694e-19	-3.75885	down	-4.29786	down	-3.48572	down	Homo sapiens BTB (POZ) domain containing 11 (BTBD11), transcript variant a, mRNA [NM_001018072]	BTB (POZ) domain containing 11	TGGGGACAGCCAAGTTTTGTTGATAAACCTATTTCCTAGCATGCCTTCAGGAAGTTGTGC
	A_33_P3288824	H2AFB3	1.12621e-17	2.67232e-19	3.33967	up	3.7305	up	3.53343	up	Homo sapiens H2A histone family, member B3 (H2AFB3), mRNA [NM_080720]	H2A histone family, member B3	CCAGGCCCCAAAGTCTTGGGCCTTCATTAATTCTGTCAATAAAATGTTTCAAGGAAAAAA
	A_24_P389491	COQ4	1.12621e-17	2.673e-19	-2.208	down	-2.28781	down	-2.22493	down	Homo sapiens coenzyme Q4 (COQ4), mRNA [NM_016035]	coenzyme Q4	TTGATCCCATGGGCCGTTCAGAACGGGCGCAGAGCCCATTGTGTCCTCAACCTGTACTAT
	A_23_P341325	RPL10L	1.13377e-17	2.69318e-19	-1.82427	down	-2.26579	down	-2.41458	down	Homo sapiens ribosomal protein L10-like (RPL10L), mRNA [NM_080746]	ribosomal protein L10-like	CAGGGTACTGTAGCCCGGGTCCACATTGGTCAAGTCATCATGTCCATCCGCACCAAGCTT
	A_23_P84189	PITPNC1	1.16131e-17	2.76088e-19	-2.53778	down	-2.44579	down	-2.62309	down	Homo sapiens phosphatidylinositol transfer protein, cytoplasmic 1 (PITPNC1), transcript variant 2, mRNA [NM_181671]	phosphatidylinositol transfer protein, cytoplasmic 1	TGTAACCACATAGCCGTATGCCAGAGAGGAAGCCTTGTTATTGGGCATTTGATGAGGTTT
	A_24_P56330	TEX29	1.16558e-17	2.77563e-19	3.15033	up	3.54811	up	3.88498	up	Homo sapiens testis expressed 29 (TEX29), transcript variant 2, mRNA [NM_152324]	testis expressed 29	CCATCATCTACAGAGTCATTCAGGAGAGCAGGAAAGAAAAGGCCATCCCTGTGGATGTCG
	A_23_P141479	SUPT6H	1.16558e-17	2.77398e-19	1.97382	up	1.34727	up	1.26366	up	Homo sapiens suppressor of Ty 6 homolog (S. cerevisiae) (SUPT6H), mRNA [NM_003170]	suppressor of Ty 6 homolog (S. cerevisiae)	ATTTTGAACTTCTGCCCTCACCGGACTCTGGGCTGTGACTGGGGCACCAAACTCAGCACA
	A_23_P132515	SIDT1	1.18111e-17	2.81493e-19	-4.62	down	-3.3352	down	-3.3489	down	Homo sapiens SID1 transmembrane family, member 1 (SIDT1), mRNA [NM_017699]	SID1 transmembrane family, member 1	TTTAAAGTCCCCAAATGTGTACTTAGCCTTCTGTTATTCCTTATTCTTTAAGCAGTGTTG
	A_24_P458479	FAM27E2	1.1824e-17	2.82034e-19	2.75551	up	2.93484	up	3.82965	up	Homo sapiens family with sequence similarity 27, member E2 (FAM27E2), long non-coding RNA [NR_103714]	family with sequence similarity 27, member E2	GATCGCCTCTAAGGATACTTAGTGGAAAAGGAACCAAATTCGGGATGGTTCTCCTTGCTT
	A_33_P3214550	CXCR2	1.20719e-17	2.88185e-19	6.53874	up	3.06599	up	3.93579	up	Homo sapiens chemokine (C-X-C motif) receptor 2 (CXCR2), transcript variant 1, mRNA [NM_001557]	chemokine (C-X-C motif) receptor 2	GGCTGATTAAACCAAGGCTAGAACCACCTGCCTATATTTTTTGTTAAATGATTTCATTCA
	A_23_P14915	CSNK2A2	1.20737e-17	2.88466e-19	-2.55646	down	-2.08987	down	-2.14481	down	Homo sapiens casein kinase 2, alpha prime polypeptide (CSNK2A2), mRNA [NM_001896]	casein kinase 2, alpha prime polypeptide	ACTTTTCCATAAGCAGAACAAGAACCAAATCAAACGTCTTAACGCGTATAGAGAGATCAC
	A_23_P118306	DNAJA3	1.2291e-17	2.93901e-19	-2.34273	down	-2.16278	down	-2.18533	down	Homo sapiens DnaJ (Hsp40) homolog, subfamily A, member 3 (DNAJA3), transcript variant 1, mRNA [NM_005147]	DnaJ (Hsp40) homolog, subfamily A, member 3	TGGTTCTCCCACTTACACTGTTGACATCTATTTTCTGAAGTGTGTTTAAATTATTCAGTG
	A_21_P0014280	LOC100128276	1.22968e-17	2.94282e-19	4.94224	up	4.54563	up	6.20734	up	Homo sapiens cDNA FLJ43282 fis, clone LIVER2007415. [AK125272]	uncharacterized LOC100128276	CTCCGGCTCTGGAAGACAGACATCTGGGATCACGGTGTCAGCAGAGTGGCCCTTCCTCTG
	A_33_P3339397	SH3YL1	1.23462e-17	2.95706e-19	-2.96668	down	-4.07768	down	-4.38122	down	Homo sapiens SH3 and SYLF domain containing 1 (SH3YL1), transcript variant 4, mRNA [NM_001282687]	SH3 and SYLF domain containing 1	AATTTTAAAAAACTTCTGTTCTACAAAATTTCCATTCCGTATGTAAAAGATTTTGTTTTT
	A_33_P3267651	DZIP3	1.24104e-17	2.9749e-19	-4.62377	down	-2.70119	down	-2.84943	down	Homo sapiens DAZ interacting zinc finger protein 3 (DZIP3), mRNA [NM_014648]	DAZ interacting zinc finger protein 3	TAGTTACCTAGATTGTGAACGATCTTGTGAAGCTGACATTTTGAAGAACACCAGTTATAA
	A_33_P3423700	LOC100131829	1.24222e-17	2.98018e-19	4.09322	up	3.01794	up	3.35984	up	Homo sapiens cDNA FLJ42008 fis, clone SPLEN2031724. [AK124002]	uncharacterized LOC100131829	CTCCATTTTAGGAGGCAGAGTTAAAACATTTTCCTCCTGTGGATGTCTGATTAGAAAAAA
	A_33_P3433156	TRMU	1.24458e-17	2.98829e-19	-2.63386	down	-2.16829	down	-2.26574	down	Homo sapiens tRNA 5-methylaminomethyl-2-thiouridylate methyltransferase (TRMU), transcript variant 7, mRNA [NM_001282785]	tRNA 5-methylaminomethyl-2-thiouridylate methyltransferase	CAGCCTCGACCTGGTCACTTTATTTCCATAGAAGACAATAAGGTTCTGGGAACACATAAA
	A_21_P0002554	lnc-HDAC4-2	1.24803e-17	3.00036e-19	3.48193	up	3.7903	up	3.55682	up	LNCipedia lincRNA (lnc-HDAC4-2), lincRNA [lnc-HDAC4-2:1]	lnc-HDAC4-2:1	CAAAAGTCACTGAGAGGTCAAGTCCTGAAGGCTATGTACAAAGAACGACTCTCCTGAAAA
	A_33_P3289251	LOC644727	1.24803e-17	3.00396e-19	3.98538	up	2.38515	up	2.66268	up	Homo sapiens cDNA FLJ38652 fis, clone HHDPC2008843. [AK095971]	uncharacterized LOC644727	GTGAGGAGGAGTTTGGCCAGAAAATTGGCTAAGAAAAATGGCAGTATGACCAAGAATGAA
	A_23_P157600	DDHD2	1.24803e-17	3.00175e-19	-1.96006	down	-1.74737	down	-1.91593	down	Homo sapiens DDHD domain containing 2 (DDHD2), transcript variant 1, mRNA [NM_015214]	DDHD domain containing 2	CCAAACCCAGGGTATCTTCCTTGATCAGCCTTTACAGTAAAAATGACCCATCTATGGCTG
	A_23_P110473	NAIP	1.28836e-17	3.10356e-19	4.16291	up	2.91888	up	3.02802	up	Homo sapiens NLR family, apoptosis inhibitory protein (NAIP), transcript variant 1, mRNA [NM_004536]	NLR family, apoptosis inhibitory protein	ACCACTTATATTGCTAGCTACATTAAGAATTTCTGAATATGTTACTGAGCTTGCTTGTGG
	A_33_P3276301		1.30556e-17	3.14758e-19	-3.8846	down	-4.19709	down	-3.85693	down	T cell receptor beta variable 11-1 [Source:HGNC Symbol;Acc:HGNC:12180] [ENST00000390367]		GGCAGATCCTGGGACAGGGCCCGGAGCTTCTGGTTCAATTTCAGGATGAGAGTGTAGTAG
	A_33_P3242543	MAOA	1.31014e-17	3.16119e-19	8.4857	up	12.5654	up	15.854	up	Homo sapiens monoamine oxidase A (MAOA), transcript variant 2, mRNA [NM_001270458]	monoamine oxidase A	AGATTTTGCCTGTATGGTACTGTTTTGTTTGTTAATAAAGTGCACTGCCACCCCCAATGC
	A_33_P3350634	KIF22	1.31297e-17	3.17061e-19	-2.23596	down	-1.94013	down	-2.10197	down	Homo sapiens kinesin family member 22 (KIF22), transcript variant 3, mRNA [NM_001256270]	kinesin family member 22	GCAGGCAGCATCCCCAAATGCCGAGATCCACATCCTGAAGAATAAAGGCCGGAAGAGAAA
	A_32_P49350		1.32429e-17	3.20055e-19	-3.77697	down	-2.966	down	-3.25054	down	ribosomal protein S4X pseudogene 2 [Source:HGNC Symbol;Acc:HGNC:16563] [ENST00000458402]		CAGTCCCCACAAGTTGAGAGAGTGTCTCCCCCTCATCATTTTCATAAGGAACAGACTTAA
	A_33_P3342802	LOC649294	1.32547e-17	3.20603e-19	5.35556	up	3.61974	up	3.6323	up	Homo sapiens cDNA FLJ33940 fis, clone CTONG2018069. [AK091259]	uncharacterized LOC649294	ATGATTTGGAGGTGGTGGGAAAACCGAGGCTGCTCAAAACTCGTGGAGAATTCTGCCTGC
	A_21_P0011831	XLOC_l2_007456	1.32755e-17	3.21367e-19	5.74102	up	3.84234	up	5.37824	up	BROAD Institute lincRNA (XLOC_l2_007456), lincRNA [TCONS_l2_00013854]		TACAAAGGCTGTGTGTGGATGGTGACGCTGAGGTTTTATCTTCAAGTGAGTTGTGCATAT
	A_33_P3244141	NDEL1	1.335e-17	3.23434e-19	2.37857	up	1.8717	up	1.9729	up	Homo sapiens nudE neurodevelopment protein 1-like 1 (NDEL1), transcript variant 1, mRNA [NM_001025579]	nudE neurodevelopment protein 1-like 1	CTCCTCTGGGCAGCTGTATAGGATCATCATGTGGTTACAAAAAATACTTCCCTCAAAAAA
	A_33_P3407880	ANKRD22	1.33769e-17	3.2435e-19	7.73943	up	11.2723	up	8.50406	up	Homo sapiens ankyrin repeat domain 22 (ANKRD22), mRNA [NM_144590]	ankyrin repeat domain 22	CTTCTTCTGTGACTGGGGATAATATCTGTAATAACTTGCTAGATCAAATGACAAAACACA
	A_21_P0000733	LINC00658	1.33967e-17	3.25093e-19	5.16998	up	4.96739	up	7.29574	up	Homo sapiens long intergenic non-protein coding RNA 658 (LINC00658), transcript variant 1, long non-coding RNA [NR_038239]	long intergenic non-protein coding RNA 658	AATGATCATACCAGACTCAGGCAAGGTTGTTTGTGCATTAGTGAAATCAGACGTATTAAA
	A_21_P0003432		1.34553e-17	3.26781e-19	7.57525	up	3.63178	up	4.05818	up			TGCAAAAGAACAACTTATCACTTTTTATTTTCAAGCCACTTCCCTCCAGCCATGTACATT
	A_19_P00330076	lnc-SIK1-5	1.38811e-17	3.37395e-19	5.57546	up	3.70079	up	4.10312	up	LNCipedia lincRNA (lnc-SIK1-5), lincRNA [lnc-SIK1-5:4]	lnc-SIK1-5:4	GGTTTCAGGAGGGCCCTGCTCCTCCTGTGGGAACCACGGACACGTGTGTGCCCGCGTGCC
	A_23_P100127	CASC5	1.38887e-17	3.38129e-19	-1.0819	down	2.48271	up	1.88855	up	Homo sapiens cancer susceptibility candidate 5 (CASC5), transcript variant 1, mRNA [NM_170589]	cancer susceptibility candidate 5	CGGTCTCTAGCAAAGATTCAGGCATTGGATCTGTTGCAGGTAAACTGAACCTAAGTCCTT
	A_23_P210726	CDC25B	1.38887e-17	3.38037e-19	-5.08558	down	-3.98087	down	-3.67921	down	Homo sapiens cell division cycle 25B (CDC25B), transcript variant 1, mRNA [NM_021873]	cell division cycle 25B	CTATTTCAGTGTTACCTGTGTGCTTGGTCTGTTTGACTTTACGCCCATCTCAGGACACTT
	A_19_P00316933		1.39765e-17	3.41092e-19	4.2049	up	4.23527	up	4.47016	up			TTGTGTAGCCGCCAGCTTCCATCTTTCTCCAGGCAGAACGCTGGCCCTCAGCACATCTTT
	A_33_P3357470	REPS2	1.39765e-17	3.41092e-19	2.20108	up	2.71706	up	3.01145	up	Homo sapiens RALBP1 associated Eps domain containing 2 (REPS2), transcript variant 1, mRNA [NM_004726]	RALBP1 associated Eps domain containing 2	GTTACTCCCACAGCTGAGCAGAGCCCCATCCCAGGCTGCAGAAAGTAGTCCAGCAAAGAA
	A_24_P943472	NR1D2	1.39765e-17	3.41027e-19	-4.18251	down	-4.18025	down	-4.20034	down	Homo sapiens nuclear receptor subfamily 1, group D, member 2 (NR1D2), transcript variant 1, mRNA [NM_005126]	nuclear receptor subfamily 1, group D, member 2	TTTAATGTATCTCTTTACATGATCTGAGAGAGGATTCAAGTTGATAGAAATAGCTGAGGG
	A_24_P139604	PYHIN1	1.39909e-17	3.4172e-19	-4.28285	down	-4.25963	down	-3.72623	down	Homo sapiens pyrin and HIN domain family, member 1 (PYHIN1), transcript variant 4, mRNA [NM_198930]	pyrin and HIN domain family, member 1	TGCTTTCGACTGAGAAAGAGGGAAAATATGTCAAAACTGATGTCAGAAATGCATAGTTTC
	A_33_P3362372		1.41231e-17	3.45227e-19	-4.26355	down	-6.01792	down	-5.0119	down	T cell receptor beta variable 14 [Source:HGNC Symbol;Acc:HGNC:12189] [ENST00000617639]		ACGTATTCTACTCTGAAGGTGCAGCCTGCAGAACTGGAGGATTCTGGAGTTTATTTCTGT
	A_33_P3283824	SLC39A8	1.41841e-17	3.46997e-19	1.8973	up	4.36153	up	1.93857	up	Homo sapiens solute carrier family 39 (zinc transporter), member 8 (SLC39A8), transcript variant 3, mRNA [NM_001135147]	solute carrier family 39 (zinc transporter), member 8	GGACATTAAAGGAATTTCCCTTTTGTTGACATAACAGTAGGATGGCTATAGCTAACAATA
	A_24_P45367	NIPAL3	1.46109e-17	3.57727e-19	-2.40765	down	-1.93611	down	-1.97784	down	Homo sapiens NIPA-like domain containing 3 (NIPAL3), mRNA [NM_020448]	NIPA-like domain containing 3	AGCGGTGTAAATGAAGTCACCTTAGAATATATTCTGTGCGGATGCTTATATTTTGTTAAC
	A_23_P56298	ZNF430	1.47766e-17	3.62074e-19	-2.85962	down	-2.20073	down	-2.32974	down	Homo sapiens zinc finger protein 430 (ZNF430), transcript variant 1, mRNA [NM_025189]	zinc finger protein 430	AACTCATATTGGAGATACATCTTACAAATACCTAGAATGTGATAAAGCCTTTAGCCAGTC
	A_23_P163380	MTHFS	1.48179e-17	3.63377e-19	2.00391	up	1.66791	up	1.50711	up	Homo sapiens 5,10-methenyltetrahydrofolate synthetase (5-formyltetrahydrofolate cyclo-ligase) (MTHFS), transcript variant 1, mRNA [NM_006441]	5,10-methenyltetrahydrofolate synthetase (5-formyltetrahydrofolate cyclo-ligase)	GTTGGCTTTCAAAGAACAGATTTGCCTCCAGGTCCCAGTGAATGAAAACGACATGAAGGT
	A_24_P366457		1.48628e-17	3.64773e-19	-1.8845	down	-2.39516	down	-2.47875	down			CACAGCAAAATTGGTCATCCTTGCTTACAACTGCCCAGCTTTGCGGAAATCAGAAGTAGA
	A_23_P362637	UBR2	1.48666e-17	3.65158e-19	2.3493	up	1.63872	up	1.94055	up	Homo sapiens ubiquitin protein ligase E3 component n-recognin 2 (UBR2), transcript variant 1, mRNA [NM_015255]	ubiquitin protein ligase E3 component n-recognin 2	TGGCAAAACCAAAGGCTGTTTTTATTCTCCTCCTTACCTTGATGACTATGGGGAGACCGA
	A_21_P0013502	XLOC_l2_014369	1.49661e-17	3.67898e-19	5.81633	up	5.39809	up	5.99616	up	BROAD Institute lincRNA (XLOC_l2_014369), lincRNA [TCONS_l2_00028009]		AGGTTCTCATGGTCTCTGAGCAGGGCAGGTGAGCAGATGTGACTGGGGATTGATCTCGGA
	A_33_P3210099	ALPK3	1.50907e-17	3.71258e-19	2.84136	up	3.89039	up	4.70383	up	Homo sapiens alpha-kinase 3 (ALPK3), mRNA [NM_020778]	alpha-kinase 3	TACGTAGAATGTAGAATCTCTGGTGAGTGAACATATCAATAAAGACAACCTGAACCAAAA
	A_23_P206501	CLEC18B	1.51078e-17	3.71976e-19	3.6188	up	3.67505	up	4.69093	up	Homo sapiens C-type lectin domain family 18, member B (CLEC18B), mRNA [NM_001011880]	C-type lectin domain family 18, member B	ACCCTGTGGGGCAGCGGAGCTTCCCTGTGGCATGAACCCCACGGGGTATTAAATTATGAA
	A_33_P3236030	ARHGAP24	1.51822e-17	3.74109e-19	3.3297	up	3.69603	up	3.53346	up	Rho GTPase activating protein 24 [Source:HGNC Symbol;Acc:HGNC:25361] [ENST00000509709]	Rho GTPase activating protein 24	AATGAAGAGAACCCAGGGAAGTTCCTTTTTGAAGTAGTTCCAGGTAAGATATTTTCCTAG
	A_33_P3304748		1.529e-17	3.77067e-19	5.62031	up	6.22826	up	6.10902	up			CCAGCACTTAGGACATAGACAAACACGAAGATGACAATCAATATTTGCCAAAATGAAAAA
	A_23_P80643	SETMAR	1.53003e-17	3.77621e-19	-1.39734	down	-1.47054	down	-1.7458	down	Homo sapiens SET domain and mariner transposase fusion gene (SETMAR), transcript variant 1, mRNA [NM_006515]	SET domain and mariner transposase fusion gene	AATGCCCGACCGCATGTTGCACAACCCACACTTCAAAAGTTGAATGAATTGGGCTATGAA
	A_33_P3775741	RPL32P3	1.5327e-17	3.78581e-19	-2.84422	down	-2.34696	down	-2.31802	down	Homo sapiens ribosomal protein L32 pseudogene 3 (RPL32P3), non-coding RNA [NR_003111]	ribosomal protein L32 pseudogene 3	CTGCCCTCAGATCCCTTGTGAAGCCCAAGATCGTCAAAAAGAGAACCAAGAAATTCATCC
	A_23_P33759	DHRS3	1.55907e-17	3.85402e-19	-2.64007	down	-2.8529	down	-2.83625	down	Homo sapiens dehydrogenase/reductase (SDR family) member 3 (DHRS3), mRNA [NM_004753]	dehydrogenase/reductase (SDR family) member 3	AGGCAGGAAAACAGCCAGAAGCCACCTTGACACTTTTGAACATTTCCAGTTCTGTAGAGT
	A_21_P0009234	lnc-AC003101.1.1-1	1.57854e-17	3.90526e-19	3.51907	up	3.251	up	3.89413	up	LNCipedia lincRNA (lnc-AC003101.1.1-1), lincRNA [lnc-AC003101.1.1-1:1]	lnc-AC003101.1.1-1:1	TTTGAGCAATAGGAAATGGGAGGGTAAATTCCTTCTTTCTCTCTCCCTTCCTGGAGCCAA
	A_23_P126727	NOL9	1.5884e-17	3.9328e-19	-1.99034	down	-1.99335	down	-2.12674	down	Homo sapiens nucleolar protein 9 (NOL9), mRNA [NM_024654]	nucleolar protein 9	GTTTCATGGCCATGAATGGTGCCCTTATTAACAACAGTGTTTTTTGTGTAATTCGTGAAT
	A_33_P3309075	TBC1D8	1.59115e-17	3.94274e-19	4.16202	up	4.24658	up	2.77238	up	Homo sapiens TBC1 domain family, member 8 (with GRAM domain) (TBC1D8), mRNA [NM_001102426]	TBC1 domain family, member 8 (with GRAM domain)	GGAACCGACACAACCCTCAAGCATTTCTATGTATTGAGAATTGTCAGTGCCCTAAGGTAT
	A_23_P100501	HMOX2	1.59204e-17	3.94809e-19	-1.6663	down	-1.92551	down	-1.89111	down	Homo sapiens heme oxygenase (decycling) 2 (HMOX2), transcript variant 3, mRNA [NM_002134]	heme oxygenase (decycling) 2	CTAGCTGCTGGACTCTTGGCCTGGTACTACATGTGAAGCACCCATCATGCCACACCGGTA
	A_23_P208293	PVRL2	1.60051e-17	3.97225e-19	4.36458	up	3.62465	up	3.49208	up	Homo sapiens poliovirus receptor-related 2 (herpesvirus entry mediator B) (PVRL2), transcript variant delta, mRNA [NM_001042724]	poliovirus receptor-related 2 (herpesvirus entry mediator B)	TACTGTTAACCTGGAAGACTACTGAATCATTTTACCCTTGCCCAGTGGAATAGGACCTAA
	A_19_P00321977	lnc-LTBP3-2	1.61988e-17	4.02351e-19	11.6532	up	4.94207	up	4.85727	up	Homo sapiens clone FLC0165 mRNA sequence. [AF130094]	lnc-LTBP3-2:4	TCTCAAGCTTTACCTTCTAACTTCTGCACCACCAGAAATTAAATTGATGGGCTTTTAAAA
	A_33_P3339100	SELP	1.62006e-17	4.03355e-19	1.32083	up	3.19751	up	2.93846	up	Homo sapiens selectin P (granule membrane protein 140kDa, antigen CD62) (SELP), mRNA [NM_003005]	selectin P (granule membrane protein 140kDa, antigen CD62)	ATAGGTCTGATAATGGGTGGGACGCTCCTGGCTTTGCTAAGAAAGCGTTTCAGACAAAAA
	A_23_P54622	KIF22	1.62006e-17	4.03084e-19	-2.51362	down	-2.09316	down	-2.23335	down	Homo sapiens kinesin family member 22 (KIF22), transcript variant 1, mRNA [NM_007317]	kinesin family member 22	TCCCCAAATGCCGAGATCCACATCCTGAAGAATAAAGGCCGGAAGAGAAAGCTGGAGTCC
	A_21_P0001153	LOC100131564	1.62006e-17	4.02904e-19	-3.40163	down	-2.09423	down	-2.01331	down	Homo sapiens uncharacterized LOC100131564 (LOC100131564), long non-coding RNA [NR_034089]	uncharacterized LOC100131564	TCTAGAAAGGGTGTGGCCGTTTTACATTGGCTGTTTTCCTCACATTCCTCAAGCAGGTAA
	A_33_P3310286		1.62557e-17	4.05046e-19	4.11539	up	3.1541	up	3.28751	up	Q3SYN7_HUMAN (Q3SYN7) Lamin B1, partial (13%) [THC2730129]		CCCTACCTTATGGTCCACTTTTTGCCTCTCACCCTTTTTATTGAAATAAAAATAAATAGC
	A_33_P3342807	XLOC_l2_013410	1.72982e-17	4.31363e-19	4.6023	up	3.4981	up	3.83204	up	BROAD Institute lincRNA (XLOC_l2_013410), lincRNA [TCONS_l2_00025878]		AACCTAGATCTCTCACATGCACGGTTCACAACAGGGTGCGTTCTCCTATGAGAATCTAAT
	A_33_P3233160	CFAP36	1.73921e-17	4.34049e-19	-1.5444	down	-2.07139	down	-2.00252	down	Homo sapiens cilia and flagella associated protein 36 (CFAP36), transcript variant 1, mRNA [NM_001282761]	cilia and flagella associated protein 36	GCTCTGATGTGGTCAGTGACCTTGAACACGAAGAGATGAAAATCCTGAGGGAAGTTCTTA
	A_23_P8416	GALNT11	1.75166e-17	4.37499e-19	-4.36024	down	-3.2299	down	-3.2588	down	Homo sapiens polypeptide N-acetylgalactosaminyltransferase 11 (GALNT11), mRNA [NM_022087]	polypeptide N-acetylgalactosaminyltransferase 11	TAATGAAGAGCATGAATTGGTTTTAAATAGTCTCCTTTGTCTAGATATGTCAGAGACTCG
	A_33_P3358148		1.75674e-17	4.39115e-19	3.64213	up	5.38186	up	5.70839	up	ens		AGATTCTTGTCCGAATAGTGAGGGCCTATAATATTCCTACCAGAAAAACAACAATTAATG
	A_23_P152234	CMTM2	1.79614e-17	4.49317e-19	3.50449	up	4.18628	up	4.17932	up	Homo sapiens CKLF-like MARVEL transmembrane domain containing 2 (CMTM2), transcript variant 1, mRNA [NM_144673]	CKLF-like MARVEL transmembrane domain containing 2	TGGAGTTTTTGCTTTTATCGATGTGTGTCTTCAAAGAAACCACTTCAGAGGCAAGAAGGC
	A_24_P50157		1.87667e-17	4.69834e-19	-1.93986	down	-2.17508	down	-2.26028	down			ATGAGCCCATGTATGTCAAGGTGGAGGCCCTTTGCCATGAACACCAAATCAACCTAATTA
	A_33_P3324065	FBF1	1.88185e-17	4.71501e-19	-2.74798	down	-2.2044	down	-2.16138	down	Homo sapiens Fas (TNFRSF6) binding factor 1 (FBF1), mRNA [NM_001080542]	Fas (TNFRSF6) binding factor 1	AGGCCTGATGACAGCTCTTCCGTGGACAGGGTGCAAGTGCATCCTTTCCAAATGTGCCAG
	A_24_P65373	ITGA2B	1.91436e-17	4.80025e-19	1.05903	up	3.41519	up	2.88333	up	Homo sapiens integrin, alpha 2b (platelet glycoprotein IIb of IIb/IIIa complex, antigen CD41) (ITGA2B), mRNA [NM_000419]	integrin, alpha 2b (platelet glycoprotein IIb of IIb/IIIa complex, antigen CD41)	ACAACAATGGCCCTGGGACTGTGAATGGTCTTCACCTCAGCATCCACCTTCCGGGACAGT
	A_23_P254978	TATDN1	1.93925e-17	4.86649e-19	-2.15036	down	-2.14421	down	-2.21186	down	Homo sapiens TatD DNase domain containing 1 (TATDN1), transcript variant 1, mRNA [NM_032026]	TatD DNase domain containing 1	GTTTGAACTGTCAGAACAAACAAAATTACCAATGTTTCTTCATTGTCGAAACTCACATGC
	A_23_P333218	ERGIC1	1.93958e-17	4.87496e-19	3.38682	up	2.3857	up	2.48884	up	Homo sapiens endoplasmic reticulum-golgi intermediate compartment (ERGIC) 1 (ERGIC1), mRNA [NM_001031711]	endoplasmic reticulum-golgi intermediate compartment (ERGIC) 1	AAATGTTTTAGTTCTTTCCCCACTCGTTGGGTTCAACTAGATTAAAAGGCTGATTTTCAG
	A_21_P0002325	LOC101927156	1.93958e-17	4.87216e-19	-3.50945	down	-3.51767	down	-2.87717	down		uncharacterized LOC101927156	TGATACTGCAAAGGACCATAGCCTAACCAGCCAAGCAAACTGGAAGTACCTTTAGACTCA
	A_33_P3263651	SEMA6B	1.94376e-17	4.89233e-19	5.79557	up	4.18193	up	3.46889	up	Homo sapiens sema domain, transmembrane domain (TM), and cytoplasmic domain, (semaphorin) 6B (SEMA6B), mRNA [NM_032108]	sema domain, transmembrane domain (TM), and cytoplasmic domain, (semaphorin) 6B	ATGCAGTACAATGCCTCCAGCGCCTTGCCGGATGACATCCTCAACTTTGTCAAGACCCAC
	A_23_P502553	TRIM35	1.94376e-17	4.89311e-19	-1.84776	down	-1.64993	down	-1.71389	down	Homo sapiens tripartite motif containing 35 (TRIM35), mRNA [NM_171982]	tripartite motif containing 35	TGACCCTCTCCTGTAAAGTATTTATCCCACCCATTAATATAATTTCTGTATAATAAACTT
	A_33_P3841368	FBXO25	1.9571e-17	4.93056e-19	-1.32644	down	-2.12282	down	-2.24091	down	F-box protein 25 [Source:HGNC Symbol;Acc:HGNC:13596] [ENST00000382824]	F-box protein 25	CCCAATTTTGGCCTGTATTTCACTTGCCAACCCGATTTATACTTTTGTATCTATTTGACA
	A_23_P23221	GADD45A	2.01517e-17	5.08082e-19	3.23076	up	5.85472	up	3.87361	up	Homo sapiens growth arrest and DNA-damage-inducible, alpha (GADD45A), transcript variant 1, mRNA [NM_001924]	growth arrest and DNA-damage-inducible, alpha	CCTGCCTTAAGTCAACTTATTTGTTTTTGCCGGGAAAGTCGCTACATGGATCAATGGGTT
	A_23_P146990	WWP1	2.01565e-17	5.08601e-19	-2.55409	down	-2.34077	down	-2.3696	down	Homo sapiens WW domain containing E3 ubiquitin protein ligase 1 (WWP1), mRNA [NM_007013]	WW domain containing E3 ubiquitin protein ligase 1	ATGCAAAACAGTTCATCCTTTTCTACTTTATTTATTGTTCCCTTGAAATGACTGACCAGG
	A_24_P10233	DAPK2	2.04255e-17	5.16597e-19	5.62646	up	4.88003	up	5.67473	up	Homo sapiens death-associated protein kinase 2 (DAPK2), mRNA [NM_014326]	death-associated protein kinase 2	AATATAAAGGACATCCTCATCATCACGGGGTGAAGGTCAGACTAAGGCAGCCTTCTTCAC
	A_23_P69310	CCRL2	2.04255e-17	5.16119e-19	2.51517	up	2.44254	up	1.93896	up	Homo sapiens chemokine (C-C motif) receptor-like 2 (CCRL2), transcript variant 1, mRNA [NM_003965]	chemokine (C-C motif) receptor-like 2	GTGAGCTAACATTTGCTAAGCACTGAATTTGTCTCAGGCACCGTGCAAGGCTCTTTACAA
	A_23_P310560	NUDT16	2.04255e-17	5.16259e-19	3.16672	up	1.94472	up	1.95179	up	Homo sapiens nudix (nucleoside diphosphate linked moiety X)-type motif 16 (NUDT16), transcript variant 2, mRNA [NM_152395]	nudix (nucleoside diphosphate linked moiety X)-type motif 16	TCTCAGCGCCTGCCTACTGGGCAGCTCATCTGTCCACTTATTCGTATTAAATTTGCTTTT
	A_33_P3227774	LOC727751	2.04409e-17	5.17388e-19	-3.0512	down	-2.78155	down	-2.54848	down	Homo sapiens golgin A2 pseudogene (LOC727751), transcript variant 1, non-coding RNA [NR_102747]	golgin A2 pseudogene	TCAGTGTGTTCTGGTTCCCACATGAGTACATATTGGCCAGCGGCTCCGAGATGATGAACT
	A_23_P259621	LAT2	2.04837e-17	5.18876e-19	2.34947	up	1.97661	up	1.98042	up	Homo sapiens linker for activation of T cells family, member 2 (LAT2), transcript variant 1, mRNA [NM_032464]	linker for activation of T cells family, member 2	CCCAGAGGGACCTTGAGTCAGAAATGTTGCCAGAAAAAGTATCTCCTCCAACCAAAACAT
	A_23_P365060	MDN1	2.05034e-17	5.19778e-19	-3.93783	down	-3.03273	down	-3.10314	down	Homo sapiens MDN1, midasin homolog (yeast) (MDN1), mRNA [NM_014611]	MDN1, midasin homolog (yeast)	CAAATATCTTTGTCATCTTTGTTGTATTGGACAATCCCAGTTCACGGGATTCTATCTTGG
	A_23_P101380	B3GNT8	2.06284e-17	5.23355e-19	3.4085	up	3.16261	up	3.28199	up	Homo sapiens UDP-GlcNAc:betaGal beta-1,3-N-acetylglucosaminyltransferase 8 (B3GNT8), mRNA [NM_198540]	UDP-GlcNAc:betaGal beta-1,3-N-acetylglucosaminyltransferase 8	GGCCTGGGCAGGAAAGATGGGGTGGTGGACTGTTTTTGCCTACTTTTTGTTTTTGAAAAA
	A_33_P3309556	PTPRE	2.07502e-17	5.26855e-19	4.77014	up	2.59972	up	2.76106	up	Homo sapiens protein tyrosine phosphatase, receptor type, E (PTPRE), transcript variant 1, mRNA [NM_006504]	protein tyrosine phosphatase, receptor type, E	GATGCAAGGATAAACCTTTACTTTGACTACCAGCCTGTGTTTTTGTCTTTAAATCTCTTA
	A_33_P3419806	RPS29	2.07633e-17	5.27595e-19	-1.92696	down	-2.08955	down	-2.09796	down	Homo sapiens ribosomal protein S29 (RPS29), transcript variant 1, mRNA [NM_001032]	ribosomal protein S29	TGTCGCGTCTGTTCAAACCGGCACGGTCTGATCTGGAAATAGGGCCTCAATATGTGCCGC
	A_19_P00318568	LOC388210	2.07853e-17	5.28564e-19	4.19933	up	2.59595	up	3.4714	up	PREDICTED: Homo sapiens uncharacterized LOC388210 (LOC388210), mRNA [XM_001716361]	uncharacterized LOC388210	CCGCCTACATCCACCTGTGTGCCCGTGGATTCGTACCCCTGGCCCCTCCTCCACAGTGTG
	A_24_P273157	OBSCN	2.10009e-17	5.34463e-19	-2.54656	down	-3.13793	down	-2.71359	down	Homo sapiens obscurin, cytoskeletal calmodulin and titin-interacting RhoGEF (OBSCN), transcript variant 1, mRNA [NM_052843]	obscurin, cytoskeletal calmodulin and titin-interacting RhoGEF	ATGGGACCAGATGTGAGCTGCAGATTCATGGCCTGTCTGTGGCAGACACTGGGGAGTACT
	A_24_P766208	RPL3	2.10189e-17	5.35333e-19	-1.83794	down	-2.2131	down	-2.37097	down	Homo sapiens ribosomal protein L3 (RPL3), transcript variant 1, mRNA [NM_000967]	ribosomal protein L3	TCTGACAAGAGCATCAACCCTCTGGGTGGCTTTGTCCACTATGGTGAAGTGACCAATGAC
	A_23_P52207	BAMBI	2.16152e-17	5.50946e-19	2.381	up	4.84121	up	4.76915	up	Homo sapiens BMP and activin membrane-bound inhibitor (BAMBI), mRNA [NM_012342]	BMP and activin membrane-bound inhibitor	AAGACTTTGTACACACTGTCACCAGGGTTATTTGCATCCAAGGGAGCTGGAATTGAGTAC
	A_23_P32707	ESPL1	2.1694e-17	5.53385e-19	2.05554	up	3.76161	up	2.79514	up	Homo sapiens extra spindle pole bodies homolog 1 (S. cerevisiae) (ESPL1), mRNA [NM_012291]	extra spindle pole bodies homolog 1 (S. cerevisiae)	CTGGTTGCCCCTTGTTTCTGGGTAATCTCTGGGATGTGACTGACCGCGACATTGACCGCT
	A_23_P52058	TARBP1	2.18222e-17	5.57085e-19	-2.08009	down	-2.83471	down	-2.73015	down	Homo sapiens TAR (HIV-1) RNA binding protein 1 (TARBP1), mRNA [NM_005646]	TAR (HIV-1) RNA binding protein 1	GTGGAACAAACTGCCAAAAGTTTAGACCTAACCCAATATTGCTTTCCTGAGAAATCTCTG
	A_33_P3261595	ANKRD34B	2.22308e-17	5.67953e-19	11.4249	up	16.186	up	10.88	up	Homo sapiens ankyrin repeat domain 34B (ANKRD34B), mRNA [NM_001004441]	ankyrin repeat domain 34B	GCAAGTTAAATATCGAGAAAAGTACTTGACTTCAAGTTGTAAGGATACAATTTGGAAGGG
	A_33_P3265374	HOMER3	2.22406e-17	5.68642e-19	3.24695	up	2.106	up	2.17372	up	Homo sapiens homer homolog 3 (Drosophila) (HOMER3), transcript variant 1, mRNA [NM_001145722]	homer homolog 3 (Drosophila)	CCCCAGTCGGCTCTGGTTGTTGGCAGCTTTGGGGCTGTTTTTGAGCTTCTCATTGTGTAG
	A_33_P3243429	GPR152	2.24324e-17	5.73988e-19	4.07155	up	2.72213	up	2.66979	up	Homo sapiens G protein-coupled receptor 152 (GPR152), mRNA [NM_206997]	G protein-coupled receptor 152	TCCAGACCCCTGCACCTGCTGCCAGTTCTGTGCCCAGTCCCTGTGATGAAGCTTCCCCAA
	A_23_P17307	MRGBP	2.25434e-17	5.77273e-19	2.05476	up	1.52814	up	1.39914	up	Homo sapiens MRG/MORF4L binding protein (MRGBP), mRNA [NM_018270]	MRG/MORF4L binding protein	GGATCCAGGCTACCTAGAGGGGCATCGGGCCAGGGAAAACCTCGGATTAGCAAGCAATAA
	A_23_P48997	PSTPIP1	2.27803e-17	5.83787e-19	3.40501	up	2.72386	up	2.85074	up	Homo sapiens proline-serine-threonine phosphatase interacting protein 1 (PSTPIP1), mRNA [NM_003978]	proline-serine-threonine phosphatase interacting protein 1	TGGACTGTGGAGAGGAACGGGCAGCGTGGCTTCGTCCCTGGTTCCTACCTGGAGAAGCTT
	A_33_P3241204	CALHM3	2.28792e-17	5.86772e-19	4.67277	up	3.865	up	3.10259	up	Homo sapiens calcium homeostasis modulator 3 (CALHM3), mRNA [NM_001129742]	calcium homeostasis modulator 3	GCAAGAATCTAAGTAAATCTGCCATGGGTTCTGGGTTCTAGATGTCAATTCTAAATAATA
	A_23_P18246	XCR1	2.28954e-17	5.87717e-19	3.30655	up	2.98692	up	2.88418	up	Homo sapiens chemokine (C motif) receptor 1 (XCR1), transcript variant 1, mRNA [NM_005283]	chemokine (C motif) receptor 1	CTGTGTGGGTAGCCAGCATCCTGTCCTCCATCCTCGACACCATCTTCCACAAGGTGCTTT
	A_21_P0014934	LOC100506124	2.28954e-17	5.88092e-19	1.09364	up	-1.52808	down	-1.36338	down	Homo sapiens uncharacterized LOC100506124 (LOC100506124), long non-coding RNA [NR_045375]	uncharacterized LOC100506124	AGGAGAACATGACCATCTGGAGTCAGTACAGATCATCAATCCTTCCACATATACAAGTTC
	A_33_P3350580		2.30933e-17	5.93715e-19	2.98485	up	3.28588	up	3.74514	up	Homo sapiens cDNA FLJ16784 fis, clone CTONG2003764. [AK131548]		ATCTCTTCCCAGCTCCGCATTCAGTGACGGGGAGTTGGTGGATGGCAATTGGGCACAGTA
	A_23_P10873	TLR1	2.30933e-17	5.94084e-19	2.82598	up	2.2851	up	2.24963	up	Homo sapiens toll-like receptor 1 (TLR1), mRNA [NM_003263]	toll-like receptor 1	ATATTCCTCCTGTTGATATTGCTGCTTTTGGAAGTTCCAACAATGACTTTATTTTGCATC
	A_24_P84048		2.31139e-17	5.9507e-19	-2.33315	down	-2.72382	down	-2.80724	down	ribosomal protein S3 pseudogene 6 [Source:HGNC Symbol;Acc:HGNC:36061] [ENST00000487417]		TTTATGCTGATAAGGTGGCCGCTAGGGGTCTGTGCATTGCCCAGGCAGAGTCTCTGCGTT
	A_24_P316430	NT5E	2.31444e-17	5.96313e-19	-3.88648	down	-3.47215	down	-3.5223	down	Homo sapiens 5'-nucleotidase, ecto (CD73) (NT5E), transcript variant 1, mRNA [NM_002526]	5'-nucleotidase, ecto (CD73)	CAAATCCAGGGACAAATTTAGTGTTTGAAGATGAAATCACTGCATTACAACCTGAAGTAG
	A_33_P3352873	BCKDHB	2.33092e-17	6.01017e-19	-3.25128	down	-3.25101	down	-3.35383	down	Homo sapiens branched chain keto acid dehydrogenase E1, beta polypeptide (BCKDHB), transcript variant 2, mRNA [NM_000056]	branched chain keto acid dehydrogenase E1, beta polypeptide	TTAATGAAGCTGCCAAGTATCGCTATCGCTCTGGGGATCTTTTTAACTGTGGAAGCCTCA
	A_33_P3279715	UHRF2	2.33773e-17	6.03234e-19	-3.46734	down	-1.93293	down	-1.84865	down	Homo sapiens ubiquitin-like with PHD and ring finger domains 2, E3 ubiquitin protein ligase (UHRF2), transcript variant 1, mRNA [NM_152896]	ubiquitin-like with PHD and ring finger domains 2, E3 ubiquitin protein ligase	CAATCAGCCATCTACATCAGCTCGTGCCCGTCTTATTGATCCTGGCTTTGGAATATATAA
	A_33_P3259203	TMEM255B	2.36542e-17	6.10847e-19	3.07505	up	3.90521	up	3.40587	up	transmembrane protein 255B [Source:HGNC Symbol;Acc:HGNC:28297] [ENST00000375353]	transmembrane protein 255B	CCTCCTCTGAGAGCAATTGTTCTGGTGTTTTCACATCCCTTAATTAATTAGCTATTATTA
	A_33_P3316544	PARP15	2.38576e-17	6.16568e-19	-4.72709	down	-2.62828	down	-2.81975	down	Homo sapiens poly (ADP-ribose) polymerase family, member 15 (PARP15), transcript variant 1, mRNA [NM_001113523]	poly (ADP-ribose) polymerase family, member 15	GTGGTATTCTTTGATAATCAGGCTTACCCAGAATATCTCATAACTTTCACGGCTTAAAAA
	A_33_P3423365	GSN	2.40849e-17	6.22918e-19	2.59038	up	3.00938	up	2.71222	up	Homo sapiens gelsolin (GSN), transcript variant 4, mRNA [NM_001127663]	gelsolin	TCTTTGTCTGGGTTGGAAAGGATTCTCAAGAAGAAGAAAAGACAGAAGCCTTGACTTCTG
	A_21_P0009267	LINC01482	2.42683e-17	6.28141e-19	6.53725	up	5.22344	up	4.95364	up	Homo sapiens long intergenic non-protein coding RNA 1482 (LINC01482), long non-coding RNA [NR_110825]	long intergenic non-protein coding RNA 1482	AGACTTCCTTGTTCGTGTCTATATGGTTCATACATGGCCTTCCCCTTAATTAAAGATGTC
	A_23_P259594	AKAP7	2.46381e-17	6.38198e-19	-1.76166	down	-2.35468	down	-2.51603	down	Homo sapiens A kinase (PRKA) anchor protein 7 (AKAP7), transcript variant gamma, mRNA [NM_016377]	A kinase (PRKA) anchor protein 7	GAAGATAAGCTCCAGGTCTTATCGTATCCCTTGCCATCTGAACTTGTTTGCACTGCTTCT
	A_33_P3587376	SNAR-A3	2.46902e-17	6.40521e-19	3.84655	up	2.58354	up	3.09532	up	Homo sapiens small ILF3/NF90-associated RNA A3 (SNAR-A3), small nuclear RNA [NR_024214]	small ILF3/NF90-associated RNA A3	GCCCTCACGGAGGCGGGGGTTCACAGGCACGAGTTCGAGGCCAGCCTGGTCCACATGGGT
	A_23_P500614	TNFRSF8	2.46902e-17	6.40419e-19	2.35819	up	1.68812	up	1.24714	up	Homo sapiens tumor necrosis factor receptor superfamily, member 8 (TNFRSF8), transcript variant 1, mRNA [NM_001243]	tumor necrosis factor receptor superfamily, member 8	GAGGGATTGACATGTTTCAACAAAATAATGCACTTCCTTACCTAGTGGCCCTTCACACAA
	A_24_P153324		2.47301e-17	6.42043e-19	-2.02936	down	-2.90021	down	-2.97042	down	ribosomal protein L7 pseudogene 44 [Source:HGNC Symbol;Acc:HGNC:36143] [ENST00000424827]		GAAGCTTAACAAGGTTTCAATTAACATGCTGGGGATTGTAGAACCATATATTGCAGGGTA
	A_33_P3224971		2.49217e-17	6.47508e-19	4.38026	up	2.74688	up	3.15265	up			CTATAATCATGCCACTGCACTTCAGTCTGAGAAATAGAGTGAGAATCATCTGTTTAATAA
	A_33_P3244274	RNF208	2.52262e-17	6.55918e-19	1.08674	up	2.31482	up	2.51176	up	Homo sapiens ring finger protein 208, mRNA (cDNA clone MGC:21544 IMAGE:4151712), complete cds. [BC016958]	ring finger protein 208	GAGTGGCATTGTCGCTGCAGCCAACTTTGCCATTAAAACTCTTTGCCAAAGTTTAAAAAA
	A_23_P19852	IQCE	2.54346e-17	6.61837e-19	2.64711	up	2.13206	up	1.92768	up	Homo sapiens IQ motif containing E (IQCE), transcript variant 1, mRNA [NM_152558]	IQ motif containing E	GGCCGATCTTTTGGAAGGGATAAGGTTTTCATTCTTGTGCAACTCATTATTCTCATTATT
	A_33_P3303857	SLAMF6	2.56419e-17	6.67736e-19	-5.61412	down	-3.28801	down	-3.3826	down	Homo sapiens SLAM family member 6 (SLAMF6), transcript variant 1, mRNA [NM_001184714]	SLAM family member 6	GTATGTTTCAGTGTCTCCAACGAACAACACTGTGTATGCTTCAGTCACTCATTCAAACAG
	A_33_P3375026		2.58245e-17	6.73e-19	4.65771	up	3.07406	up	2.85034	up			CTTTTTAAGGTCTATGTAAGGACACATACAACCACCACAAAATGACATACATCCTTCACT
	A_23_P56703	TRABD2A	2.59153e-17	6.75879e-19	-2.51551	down	-4.06622	down	-3.60723	down	Homo sapiens TraB domain containing 2A (TRABD2A), transcript variant 1, mRNA [NM_001277053]	TraB domain containing 2A	GACCCCTCGGACTTGAAGAATGGCCATTCCTGTACTCCACATTCTGGTCTAGCCTTGTTG
	A_33_P3356007	ALOX5	2.7048e-17	7.06487e-19	7.51191	up	5.00405	up	4.67891	up	arachidonate 5-lipoxygenase [Source:HGNC Symbol;Acc:HGNC:435] [ENST00000475300]	arachidonate 5-lipoxygenase	TCTGAGATCTAGACACCCTTTCAGGAGGCCTGGAAGGGTGAAGGCTGGAGTCTGCTCAGA
	A_23_P161719	CWF19L2	2.7048e-17	7.06251e-19	-1.93587	down	-2.07966	down	-2.21732	down	Homo sapiens CWF19-like 2, cell cycle control (S. pombe) (CWF19L2), mRNA [NM_152434]	CWF19-like 2, cell cycle control (S. pombe)	CTTCATTTTAGTCACCATGGAGTAAAAACATATATTCGATGATCTGCTCACATTCCTGCT
	A_33_P3308105	GGH	2.80671e-17	7.33658e-19	2.695	up	4.79641	up	2.97632	up	Homo sapiens gamma-glutamyl hydrolase (conjugase, folylpolygammaglutamyl hydrolase) (GGH), mRNA [NM_003878]	gamma-glutamyl hydrolase (conjugase, folylpolygammaglutamyl hydrolase)	CACAGATTCTTTTCTATAATGTGCCTGGCTCTGATTCTTCATTCTGTATGTGACTATTTA
	A_33_P3231670	RNF208	2.86147e-17	7.48536e-19	-1.02223	down	2.14593	up	2.41702	up	Homo sapiens ring finger protein 208 (RNF208), mRNA [NM_031297]	ring finger protein 208	GTGGCATTGTCGCTGCAGCCAACTTTGCCATTAAAACTCTTTGCCAAAGTTTGCACCTGT
	A_23_P122724	VNN2	2.86355e-17	7.49645e-19	3.11917	up	2.4205	up	2.3159	up	Homo sapiens vanin 2 (VNN2), transcript variant 1, mRNA [NM_004665]	vanin 2	AAAGAGCCTGGGTGTTTGGGTCAGATAAATGAAGATCAAACTCCAGCTCCAGCCTCATTT
	A_23_P200780	TGFBR3	2.87235e-17	7.52514e-19	-4.9647	down	-4.38991	down	-4.17964	down	Homo sapiens transforming growth factor, beta receptor III (TGFBR3), transcript variant 1, mRNA [NM_003243]	transforming growth factor, beta receptor III	GGCCCTGAGTTTTACCCAGACTCAAGGAGTTGGTAAAGGGTTAATAGCCAGATAGTAGAA
	A_23_P324490	KIAA0355	2.88375e-17	7.56069e-19	-1.26299	down	-2.12996	down	-1.86632	down	Homo sapiens KIAA0355 (KIAA0355), mRNA [NM_014686]	KIAA0355	GTGTGTATAGTTACAATGCTTCCAAACTGGAACTCTACATTTTGTATCTTTTAAAGCTCC
	A_33_P3334102	ARHGAP27	2.94371e-17	7.7237e-19	2.93054	up	2.75703	up	2.69971	up	Homo sapiens Rho GTPase activating protein 27 (ARHGAP27), transcript variant 3, mRNA [NM_174919]	Rho GTPase activating protein 27	CTCCCTGGAAGCCCAGAGGCTTTTCGTAATCCAATTGGTGGCAAAATTGCGCTTGAACTG
	A_23_P107322	CORO6	2.95431e-17	7.75733e-19	3.60834	up	4.07522	up	3.38708	up	Homo sapiens coronin 6 (CORO6), mRNA [NM_032854]	coronin 6	ACTGGCATGAGGAGTTAGGTTCATCACAAATACACACACACTGCCCCCAACCCTCTGCCG
	A_33_P3368900		2.97081e-17	7.80651e-19	2.88153	up	2.32254	up	2.42943	up			AGGGCGCGCAGCGACGGCCGCTCCATGGCGGGGTGCGGTGGCAGCGGCAAGGGCGCGAGT
	A_21_P0014380		2.99706e-17	7.88142e-19	-2.74614	down	-3.42623	down	-3.65162	down	PREDICTED: Homo sapiens uncharacterized LOC100507486 (LOC100507486), misc_RNA [XR_109525]		CAAGTATTGGGGTAATAGCCAGTGTCTTAGTTGTTTAAACAGTTTAATGGAAATCAGTAC
	A_21_P0004878	lnc-FTSJD2-1	3.05991e-17	8.05272e-19	-3.99209	down	-4.25668	down	-4.28392	down	LNCipedia lincRNA (lnc-FTSJD2-1), lincRNA [lnc-FTSJD2-1:6]	lnc-FTSJD2-1:6	GTATATTTTTACTTTTTAAAAAACTTCCTAAGATTTTTCCCTTGGAGAGACAACAGGCTG
	A_32_P163147	VSIG1	3.11786e-17	8.21137e-19	-3.27782	down	-3.72709	down	-3.27826	down	Homo sapiens V-set and immunoglobulin domain containing 1 (VSIG1), transcript variant 2, mRNA [NM_182607]	V-set and immunoglobulin domain containing 1	TTCTTCCCCTGTTGAAAAGCTTTCTCATGATCATATTTCACCCACATCTCACCTTGAAGA
	A_23_P104692	PELI3	3.14057e-17	8.28184e-19	3.23442	up	1.95447	up	1.83065	up	Homo sapiens pellino E3 ubiquitin protein ligase family member 3 (PELI3), transcript variant 1, mRNA [NM_145065]	pellino E3 ubiquitin protein ligase family member 3	CAAAGGGAGGAGAGAGGACTCACTGGTCAAGAGTGTCGGCTGTGACACAAGGGCCATCAT
	A_33_P3234202	DNASE1L3	3.14057e-17	8.28355e-19	-2.17957	down	-3.37737	down	-4.66369	down	Homo sapiens deoxyribonuclease I-like 3 (DNASE1L3), transcript variant 1, mRNA [NM_004944]	deoxyribonuclease I-like 3	GACCCAAGGGTCTCATCTTATTAACCATTTCTTGCCTCTAAATAAAATGTCTCTAACAGA
	A_24_P194017	NOSIP	3.18916e-17	8.41802e-19	-1.97416	down	-2.35449	down	-2.14125	down	Homo sapiens nitric oxide synthase interacting protein (NOSIP), transcript variant 1, mRNA [NM_015953]	nitric oxide synthase interacting protein	ATGATGTCCAACCTGGGCCCAGTGTGGGTCCTCCAAGTAAGGACAAGGACAAAGTGCTGC
	A_32_P178945	YOD1	3.20305e-17	8.46099e-19	3.56877	up	3.37322	up	2.81248	up	Homo sapiens YOD1 deubiquitinase (YOD1), transcript variant 1, mRNA [NM_018566]	YOD1 deubiquitinase	TTGCCAGCATTTTTTGAAGTAATACACTGCTGCTACCTGGAAGATGTCTAACTTCATTTT
	A_23_P337729	TMEM180	3.22736e-17	8.53155e-19	2.77349	up	2.18684	up	1.975	up	Homo sapiens transmembrane protein 180 (TMEM180), mRNA [NM_024789]	transmembrane protein 180	TGGTTTCTCTGAGAGGTTTCTCTGCTTCGGCTGTGCTTGAAGTGGCATGCCTCCTCTGCT
	A_33_P3327479	ZDHHC3	3.2442e-17	8.58247e-19	2.39061	up	1.9685	up	1.88361	up	Homo sapiens zinc finger, DHHC-type containing 3 (ZDHHC3), transcript variant 2, mRNA [NM_016598]	zinc finger, DHHC-type containing 3	GGAGAGAGATTGGGTGCAATTTGCCTCTTTCTTTGAATAAAAAGCTCTTTGCTCACCCTC
	A_21_P0004717	lnc-SERPINB6-2	3.26892e-17	8.65431e-19	2.76869	up	2.76155	up	2.99436	up	LNCipedia lincRNA (lnc-SERPINB6-2), lincRNA [lnc-SERPINB6-2:2]	lnc-SERPINB6-2:2	CAGCTGGAGATAAGGAGTGGGCCCTGGAAGATGCTCAGTCAGGCCCTGCTCCAGATTTTA
	A_33_P3260689	H2AFB1	3.32161e-17	8.80037e-19	3.7707	up	3.55572	up	3.38353	up	Homo sapiens H2A histone family, member B1 (H2AFB1), mRNA [NM_001017990]	H2A histone family, member B1	GGTTCACAACGACAGGCTACTGAGCACCCTTTTCAACACGACCACCATCTCTCAAGTGGC
	A_33_P3315074		3.332e-17	8.83445e-19	5.95619	up	3.45081	up	3.20478	up			TGGGAACTGCTGCTTGTCTGACTTCCATCCATTCATCCATCCACCCACATGCATATCCAT
	A_23_P147641	TCEA2	3.40017e-17	9.02191e-19	-1.62948	down	-2.13224	down	-2.19087	down	Homo sapiens transcription elongation factor A (SII), 2 (TCEA2), transcript variant 1, mRNA [NM_003195]	transcription elongation factor A (SII), 2	ATCGAGGAATGCATCTTCCGGGACGTTGGAAACACAGACATGAAGTATAAGAACCGTGTA
	A_33_P3233659	RPP30	3.40246e-17	9.03469e-19	1.31841	up	-1.32695	down	-1.41755	down	Homo sapiens ribonuclease P/MRP 30kDa subunit (RPP30), transcript variant 1, mRNA [NM_001104546]	ribonuclease P/MRP 30kDa subunit	GTGCCTGTTTCCTGTCTCGCTCATGTCACATTTTGGTAATTTTCACAATATTAAAAACTT
	A_33_P3269539	COL6A2	3.44934e-17	9.16597e-19	-5.15514	down	-5.07143	down	-4.60362	down	Homo sapiens collagen, type VI, alpha 2 (COL6A2), transcript variant 2C2a, mRNA [NM_058174]	collagen, type VI, alpha 2	TGACGCTGTTCTCCGACCTGGTCGCTGAGAAGTTCATCGATGACATGGAGGACGTCCTCT
	A_23_P126540	TMIGD3	3.45227e-17	9.18056e-19	3.69354	up	6.59382	up	7.62572	up	Homo sapiens transmembrane and immunoglobulin domain containing 3 (TMIGD3), transcript variant 1, mRNA [NM_020683]	transmembrane and immunoglobulin domain containing 3	ACACGGGCTGGTACTGGTGTGGCATCCAGCGGGACTTTGCCAGGGATGACATGGATTTTA
	A_23_P414713	ZNF528	3.49917e-17	9.31217e-19	-2.7325	down	-2.77251	down	-2.99914	down	Homo sapiens zinc finger protein 528 (ZNF528), mRNA [NM_032423]	zinc finger protein 528	GAAATGGAATAGAGAACAGTTATATCACAGTTGAGAGTTTAATCAAAATGACCGGATCAG
	A_24_P391604	KRTAP6-3	3.50237e-17	9.32758e-19	6.98957	up	12.3184	up	10.8383	up	Homo sapiens keratin associated protein 6-3 (KRTAP6-3), mRNA [NM_181605]	keratin associated protein 6-3	GACTGTGGCTATGGCTGTGGCTATGGCTATGTCTCCCACTCCTTCTGTGGCTGTGGCTAT
	A_24_P6517	PLEKHG1	3.51333e-17	9.3637e-19	-3.89079	down	-1.53263	down	-2.78424	down	Homo sapiens pleckstrin homology domain containing, family G (with RhoGef domain) member 1 (PLEKHG1), mRNA [NM_001029884]	pleckstrin homology domain containing, family G (with RhoGef domain) member 1	CAGGAAAGCTGTTTCGCATTTTCGCTTTTTGATTGGTATTATCCAGTTCTATGTAGTTCA
	A_19_P00322190	RP9P	3.52225e-17	9.39443e-19	2.111	up	1.84249	up	1.93755	up	Homo sapiens retinitis pigmentosa 9 pseudogene (RP9P), non-coding RNA [NR_003500]	retinitis pigmentosa 9 pseudogene	GGCTGGGGGCGCGTGGTGGCCGCGGGAGCCGCTGGATCAGGAACTGCAGCGGGCCCGGGA
	A_21_P0003155	LINC00635	3.52368e-17	9.40519e-19	6.97516	up	4.62059	up	4.90211	up	Homo sapiens long intergenic non-protein coding RNA 635 (LINC00635), transcript variant 2, long non-coding RNA [NR_015414]	long intergenic non-protein coding RNA 635	TTTCTTCATTGCTTGGATTCAATCCTCCGGGCGGCTCAGGCTCAAACATAACTTAAGCAT
	A_23_P62605	RPL11	3.5305e-17	9.43035e-19	-1.33635	down	-1.72114	down	-1.84356	down	Homo sapiens ribosomal protein L11 (RPL11), transcript variant 1, mRNA [NM_000975]	ribosomal protein L11	AAACAACTTCTCAGATACTGGAAACTTTGGTTTTGGGATCCAGGAACACATCGATCTGGG
	A_21_P0007539	lnc-FGD4-1	3.55595e-17	9.50533e-19	4.03315	up	4.56039	up	4.16699	up	LNCipedia lincRNA (lnc-FGD4-1), lincRNA [lnc-FGD4-1:1]	lnc-FGD4-1:1	TACAGAGGAAGTGATTCATGCACTGTTTTGTCCTGCAGGAGTTCCGGCAAACACAACTTT
	A_24_P303989	BMI1	3.59251e-17	9.61248e-19	-4.36924	down	-2.90576	down	-2.86052	down	Homo sapiens BMI1 proto-oncogene, polycomb ring finger (BMI1), mRNA [NM_005180]	BMI1 proto-oncogene, polycomb ring finger	AGTTTCTCAGAAGTAAAATGGACATACCTAATACTTTCCAGATTGATGTCATGTATGAGG
	A_23_P34375	TCEA3	3.59251e-17	9.61722e-19	-4.69453	down	-4.89873	down	-4.26934	down	Homo sapiens transcription elongation factor A (SII), 3 (TCEA3), mRNA [NM_003196]	transcription elongation factor A (SII), 3	TGAAGGCGGACGATGATTACAAGGACTATGGAGTCAACTGTGACAAGATGGCATCAGAAA
	A_23_P50081	IMPA2	3.64786e-17	9.77261e-19	2.23869	up	2.34974	up	2.22678	up	Homo sapiens inositol(myo)-1(or 4)-monophosphatase 2 (IMPA2), mRNA [NM_014214]	inositol(myo)-1(or 4)-monophosphatase 2	TAGCTGTTTCTCTCTTTAATCTCACGTAGCCTTTTTCAGGTTAGTACGTGTTCTTCTGTC
	A_23_P105619	TMEM116	3.67883e-17	9.86283e-19	-2.77045	down	-2.59905	down	-2.56446	down	Homo sapiens transmembrane protein 116 (TMEM116), transcript variant 3, mRNA [NM_138341]	transmembrane protein 116	AGGCTCGGCGTGATGCAGATACCCAGACACCATTATTATGCTCACAGAAGAGATTCTATA
	A_33_P3323803	PDE4DIP	3.68766e-17	9.89377e-19	-2.26109	down	-2.75437	down	-2.60382	down	Homo sapiens phosphodiesterase 4D interacting protein (PDE4DIP), transcript variant 1, mRNA [NM_014644]	phosphodiesterase 4D interacting protein	GCACCTGTGTTCTTTGAGTTCACATCATGAATGTGGTGATTTCCCAGATACCATCTCAGG
	A_23_P35444	INA	3.71295e-17	9.96893e-19	6.96037	up	3.91249	up	4.35974	up	Homo sapiens internexin neuronal intermediate filament protein, alpha (INA), mRNA [NM_032727]	internexin neuronal intermediate filament protein, alpha	AGTTCAAGGAACTTGAAAAATACTTTTCCTTACCTTTACCCCATCCCTGTCTTTACTCCT
	A_19_P00316745	LINC00963	3.73311e-17	1.00378e-18	2.32165	up	1.39923	up	1.77555	up	long intergenic non-protein coding RNA 963 [Source:HGNC Symbol;Acc:HGNC:48716] [ENST00000444184]	long intergenic non-protein coding RNA 963	TTGCGGTGATAGGGCCAAGGGCCTGGGCCTTCAATTCTCCAGACTTGCCAAAATGCTCAG
	A_23_P84995	MTMR8	3.73311e-17	1.00338e-18	-2.41128	down	-1.99433	down	-2.1778	down	Homo sapiens myotubularin related protein 8 (MTMR8), mRNA [NM_017677]	myotubularin related protein 8	ACATTCTGTGTGGCCTTTCTTGGTTCAGAGGAAACCAGACTTCAGGAACCCTCTCTATAA
	A_21_P0001768	LOC200772	3.76296e-17	1.01255e-18	-2.98616	down	-3.50871	down	-8.67291	down	Homo sapiens uncharacterized LOC200772 (LOC200772), long non-coding RNA [NR_033841]	uncharacterized LOC200772	TTGCATAACAGAAGATGTATCAGGTCTTTGTCCTGGATCCTCGGAGGAAGCTTCTAAACC
	A_24_P83738	ASTN2	3.79878e-17	1.02293e-18	2.4328	up	2.06274	up	1.95752	up	Homo sapiens astrotactin 2 (ASTN2), transcript variant 4, mRNA [NM_198188]	astrotactin 2	TGTGGTCTCCTTGGAGTGGGTGGATGTTCAGCCAGCTATTGGGACCAAGGTCTCCGACTA
	A_23_P57236	GGT7	3.80204e-17	1.02456e-18	-1.75572	down	-2.01409	down	-1.72371	down	Homo sapiens gamma-glutamyltransferase 7 (GGT7), mRNA [NM_178026]	gamma-glutamyltransferase 7	CGAAGGACCAACAACTTCATCATCGCTGTTAAGGACCCTCGGAGCCCAGATGCAGCTGGA
	A_33_P3362088	P2RX4	3.85596e-17	1.03985e-18	2.32	up	1.62259	up	1.50802	up	Homo sapiens purinergic receptor P2X, ligand gated ion channel, 4 (P2RX4), transcript variant 1, mRNA [NM_001256796]	purinergic receptor P2X, ligand gated ion channel, 4	TCCTCAGAGAAGCGCTGTGCTAAGGTGATCGAGGACCAGACATTAAAGCGTGATTTTCTT
	A_23_P120710	TTC3	3.89359e-17	1.05077e-18	-3.50405	down	-2.89625	down	-2.83317	down	Homo sapiens tetratricopeptide repeat domain 3 (TTC3), transcript variant 1, mRNA [NM_003316]	tetratricopeptide repeat domain 3	TCGTTCTGTGTTTGATATTTGTGTAAAGTATGCATGCAGTCTTGTACTGTGACCTAAGAA
	A_23_P371410	PRKACB	3.94662e-17	1.06585e-18	-2.56498	down	-3.01534	down	-3.00929	down	Homo sapiens protein kinase, cAMP-dependent, catalytic, beta (PRKACB), transcript variant 3, mRNA [NM_207578]	protein kinase, cAMP-dependent, catalytic, beta	GCACCTTAGAAGAATGACACCAGAAAACCTTATTATATCACAATATTCTGTTTTCCCCTT
	A_23_P103310	S100A7	4.07058e-17	1.10014e-18	3.49619	up	3.18278	up	4.01288	up	Homo sapiens S100 calcium binding protein A7 (S100A7), mRNA [NM_002963]	S100 calcium binding protein A7	ACGATGATGAAGGAGAACTTCCCCAACTTCCTTAGTGCCTGTGACAAAAAGGGCACAAAT
	A_24_P780052	RPSAP58	4.11972e-17	1.11423e-18	-2.77774	down	-2.79401	down	-3.02576	down	Homo sapiens ribosomal protein SA pseudogene 58 (RPSAP58), non-coding RNA [NR_003662]	ribosomal protein SA pseudogene 58	AGGCATCTTATGTTAATCTACCTACCATCGCTCTGTGTAACACAGATTCTCCTCTGCGCT
	A_21_P0007235	lnc-P2RY2-2	4.17508e-17	1.13002e-18	4.25155	up	3.13071	up	3.1786	up	LNCipedia lincRNA (lnc-P2RY2-2), lincRNA [lnc-P2RY2-2:1]	lnc-P2RY2-2:1	GCAGTGCCCTGATGTCCTCTGTTGCATTGTTTATCATCTTTTATTGTAAAGGCTCCAATT
	A_21_P0014930	POM121L4P	4.20318e-17	1.13846e-18	4.41878	up	4.76929	up	5.66009	up	Homo sapiens POM121 transmembrane nucleoporin-like 4 pseudogene (POM121L4P), non-coding RNA [NR_024592]	POM121 transmembrane nucleoporin-like 4 pseudogene	AGGACAAGGACCCTAGAGTCCAAGAGAATCCTGGTGATCAGAGAAGGGTCCCCGAGGTCA
	A_19_P00321263	UBA6-AS1	4.245e-17	1.15062e-18	-3.42491	down	-2.54731	down	-2.62632	down	Homo sapiens UBA6 antisense RNA 1 (head to head) (UBA6-AS1), long non-coding RNA [NR_015439]	UBA6 antisense RNA 1 (head to head)	TTGTGAGGAGATTTCATGACAGATGGCAGGAAGCTTCGTGGAGAGATTTCTGAAGACACT
	A_23_P396626	SYNRG	4.26191e-17	1.15605e-18	-2.44246	down	-1.80727	down	-1.72548	down	Homo sapiens synergin, gamma (SYNRG), transcript variant 1, mRNA [NM_007247]	synergin, gamma	GGAGCTCTCGGCCTAGTGTAAAGTATCAAGATGTATATTTATGGGATAGATACATGACTT
	A_24_P928510	THEM4	4.28345e-17	1.16273e-18	-3.49216	down	-3.09835	down	-3.44982	down	Homo sapiens thioesterase superfamily member 4 (THEM4), mRNA [NM_053055]	thioesterase superfamily member 4	TAACCCAGGCTGTACTGTTGTTTCTTACCAACAGCATAGGTTTTCATCACTGGAAGGAGC
	A_21_P0003971	lnc-ROPN1L-1	4.30681e-17	1.16992e-18	5.51419	up	4.30009	up	5.3182	up	PREDICTED: Homo sapiens rhophilin associated tail protein 1-like (ROPN1L), transcript variant X1, mRNA [XM_006714503]	lnc-ROPN1L-1:1	TGCTACACTTTCTTATCATAGTTTACCGCAATTAAAAATCAAAACAAAACAAAACGAAAA
	A_23_P112061	HGSNAT	4.32404e-17	1.17545e-18	1.53874	up	1.01607	up	1.00776	up	Homo sapiens heparan-alpha-glucosaminide N-acetyltransferase (HGSNAT), mRNA [NM_152419]	heparan-alpha-glucosaminide N-acetyltransferase	TTCTGTATTCCTCATGGTGCCAAACACAGTGCCTTCTACATTGCAGGCGCTGAATAAACA
	A_24_P385585	TMEM18	4.3288e-17	1.1776e-18	-2.62895	down	-2.76828	down	-2.70143	down	Homo sapiens transmembrane protein 18 (TMEM18), mRNA [NM_152834]	transmembrane protein 18	GTTCTGTTAGGACAGGCATACTGTTACTTTGCAATATCCACTTTATAAAATAGCTCCTGC
	A_33_P3231297	CREG1	4.33992e-17	1.18148e-18	2.86988	up	2.13592	up	1.87711	up	Homo sapiens cellular repressor of E1A-stimulated genes 1 (CREG1), mRNA [NM_003851]	cellular repressor of E1A-stimulated genes 1	CTGAAAACTGCAAAGTGAACTTAACTGAGATCCAGCAAACAGGTTCTGTTTAAGAAAAAT
	A_23_P10743	PDE6B	4.37136e-17	1.1909e-18	-2.06336	down	-2.42932	down	-2.38087	down	Homo sapiens phosphodiesterase 6B, cGMP-specific, rod, beta (PDE6B), transcript variant 1, mRNA [NM_000283]	phosphodiesterase 6B, cGMP-specific, rod, beta	TCTTCAACCTGCTGTATCCTGTGAGCACTGGTCCCATGGGGACCCTATGGCTCCCTCAAT
	A_33_P3271635	HLA-DPB1	4.39674e-17	1.19868e-18	-4.48611	down	-5.64082	down	-5.40271	down	Homo sapiens major histocompatibility complex, class II, DP beta 1 (HLA-DPB1), mRNA [NM_002121]	major histocompatibility complex, class II, DP beta 1	TAATGGGACACAGCGCTTCCTGGAGAGATACATCTACAACCGGGAGGAGCTCGTGCGCTT
	A_21_P0009673		4.40782e-17	1.20258e-18	8.22589	up	3.45313	up	5.08815	up	PREDICTED: Homo sapiens uncharacterized LOC101927522 (LOC101927522), transcript variant X1, ncRNA [XR_243988]		TTTTGAGAACTGCTTCGAGAGGGGACCAGATGCGCAGAGACAAGCTTCCAGCCTGGCTAG
	A_33_P3319920	KDM4B	4.43644e-17	1.21126e-18	2.87604	up	2.10227	up	2.16153	up	Homo sapiens lysine (K)-specific demethylase 4B (KDM4B), mRNA [NM_015015]	lysine (K)-specific demethylase 4B	TTTTTGCCTAATGTCCCTGCCTCTAGGTTCATAATGAATTAAAGGTTCATGAACGCTGCG
	A_33_P3376551	PTGFR	4.4747e-17	1.22259e-18	6.69629	up	9.97815	up	8.04882	up	Homo sapiens prostaglandin F receptor (FP) (PTGFR), transcript variant 2, mRNA [NM_001039585]	prostaglandin F receptor (FP)	CCACCTGGTAAATAATGTTGGACTTCAACTTGTTACTGGCACATTTTAATAGTAGATGAA
	A_24_P145066	KIF1B	4.49304e-17	1.22848e-18	5.55253	up	5.04338	up	4.53164	up	Homo sapiens kinesin family member 1B (KIF1B), transcript variant 2, mRNA [NM_183416]	kinesin family member 1B	TAGCTAGAACAGTTGAAGTCTTCAACTGAGGTTTTATAGCAGATTAGACATGGGTAAATG
	A_33_P3212112	SLC12A6	4.58201e-17	1.25371e-18	3.43474	up	2.31261	up	2.49996	up	Homo sapiens solute carrier family 12 (potassium/chloride transporter), member 6 (SLC12A6), transcript variant 5, mRNA [NM_001042496]	solute carrier family 12 (potassium/chloride transporter), member 6	GAGATGCTGCAACAGTTCTTGATTTAGCAGCAGTTATTCTCTTGTTTACATAGTTATGTT
	A_33_P3474319	SLC37A2	4.64801e-17	1.27269e-18	1.81616	up	-1.05491	down	-1.21065	down	Homo sapiens solute carrier family 37 (glucose-6-phosphate transporter), member 2 (SLC37A2), transcript variant 1, mRNA [NM_198277]	solute carrier family 37 (glucose-6-phosphate transporter), member 2	TAGCTCTTGGCATCTCCATCTGAGCCTAAAGTTGCCCACTGGCACCAATAGATTCTGTTT
	A_33_P3268403	TRAF3IP3	4.68221e-17	1.28298e-18	-2.53057	down	-2.18333	down	-2.36734	down	TRAF3 interacting protein 3 [Source:HGNC Symbol;Acc:HGNC:30766] [ENST00000476050]	TRAF3 interacting protein 3	GGGAAGAAATAGGAAAAAAGAAAGACTTCTCTATTTTCTCATCTCCCTAACATTCCTTCT
	A_21_P0006389		4.68338e-17	1.28422e-18	5.63849	up	3.34042	up	3.34896	up			AAGACGTCTGAGCCATCCCTGTGCCACCACCAAGAGTCACTCCAGCTTCTGAAAAAGCCA
	A_19_P00806593	lnc-MAPK13-1	4.78825e-17	1.31392e-18	3.67355	up	4.97814	up	5.39391	up	LNCipedia lincRNA (lnc-MAPK13-1), lincRNA [lnc-MAPK13-1:1]	lnc-MAPK13-1:1	TACACTCTGGTTCTTTCACCACCATACGAAGGTCCAGCCTCATGCTAGGACCTTGGGGGC
	A_24_P74371	CTSA	4.82977e-17	1.32626e-18	1.68852	up	2.03302	up	2.06243	up	Homo sapiens cathepsin A (CTSA), transcript variant 1, mRNA [NM_000308]	cathepsin A	AGGGTCTCCCATAGACAGCCTGGGGGCAAGTTAGCACTTTATTCCCGCAGCAGTTCCTGA
	A_33_P3372580	COG1	4.98452e-17	1.37072e-18	-1.32279	down	-1.63292	down	-1.59799	down	Homo sapiens component of oligomeric golgi complex 1 (COG1), mRNA [NM_018714]	component of oligomeric golgi complex 1	CTAAGTAACATGGCAACACATCTGTCTCTCCCTAAATAAATACTACCACATTATTTCTTC
	A_33_P3406706	EXOG	4.98452e-17	1.37042e-18	-3.08594	down	-2.53826	down	-2.44716	down	Homo sapiens endo/exonuclease (5'-3'), endonuclease G-like (EXOG), transcript variant 1, mRNA [NM_005107]	endo/exonuclease (5'-3'), endonuclease G-like	TTAGTGACCAGATACTGCCAAATTGATGTGTTCTTGCTTTCCAGGTGAGCTTTTTGTTCT
	A_33_P3343432	THEM4	4.98783e-17	1.37262e-18	-3.73955	down	-3.11956	down	-2.98366	down	Homo sapiens thioesterase superfamily member 4 (THEM4), mRNA [NM_053055]	thioesterase superfamily member 4	TTGCCTTCATATAAACGTACACCTACTGAATGGATTCAAGACTTCAAAACCCATTTTCTT
	A_24_P132470	ESYT2	4.99234e-17	1.37484e-18	-2.38968	down	-2.747	down	-2.73311	down	Homo sapiens extended synaptotagmin-like protein 2 (ESYT2), mRNA [NM_020728]	extended synaptotagmin-like protein 2	TGATAATATATTCTGCACGGTAAGAATTCCTTTTACAGACATTCTTTATCAAGAGGTCGG
	A_23_P428640	PPP1R3E	5.07092e-17	1.39748e-18	-2.42627	down	-1.89284	down	-1.75688	down	Homo sapiens protein phosphatase 1, regulatory subunit 3E (PPP1R3E), mRNA [NM_001276318]	protein phosphatase 1, regulatory subunit 3E	TAATCCACCCACTGAATAGCTAACCTGGGGAGGAAATGAAAATTTCCTTTGTGGATCTCC
	A_33_P3229181	SLC12A9	5.33636e-17	1.47239e-18	3.64896	up	2.89342	up	2.86222	up	Homo sapiens solute carrier family 12, member 9 (SLC12A9), transcript variant 1, mRNA [NM_020246]	solute carrier family 12, member 9	GTGGTGATGTTTTCGTTCTGTTTTATTTTTCTAACTCTGCTGACCATGAATAAAAGACCA
	A_24_P396753	TRIB2	5.33636e-17	1.47274e-18	-5.81116	down	-4.32171	down	-3.80355	down	Homo sapiens tribbles pseudokinase 2 (TRIB2), transcript variant 1, mRNA [NM_021643]	tribbles pseudokinase 2	GGACCATCCTTGGTTTTCTACAGATTTTAGCGTCTCGAATTCAGCATATGGTGCTAAGGA
	A_19_P00318085	HCG18	5.3631e-17	1.48132e-18	-2.79971	down	-2.39931	down	-2.2482	down	Homo sapiens HLA complex group 18 (non-protein coding) (HCG18), transcript variant 1, long non-coding RNA [NR_024052]	HLA complex group 18 (non-protein coding)	TGAATAGCACATGGCTCCTGTGGTGGATCTGATAGTGGCATAGCACCAAGTGATGCAGGC
	A_23_P129801	RAB40B	5.3631e-17	1.48223e-18	-3.88827	down	-3.7423	down	-3.65581	down	Homo sapiens RAB40B, member RAS oncogene family (RAB40B), mRNA [NM_006822]	RAB40B, member RAS oncogene family	TCGAATTTCTACGTGGATGTGCATGAAGCTCTTGTTTTCGATGTGTGTTTGTAAAGGGAA
	A_23_P161190	VIM	5.39486e-17	1.49207e-18	2.31966	up	2.06689	up	1.96246	up	Homo sapiens vimentin (VIM), mRNA [NM_003380]	vimentin	TGATTAAGACGGTTGAAACTAGAGATGGACAGGTTATCAACGAAACTTCTCAGCATCACG
	A_23_P144458	CAMK2D	5.39675e-17	1.49366e-18	-3.47035	down	-3.11795	down	-2.99112	down	Homo sapiens calcium/calmodulin-dependent protein kinase II delta (CAMK2D), transcript variant 3, mRNA [NM_001221]	calcium/calmodulin-dependent protein kinase II delta	AATGGGGACTTTGAAGCCTACACAAAAATCTGTGACCCAGGCCTTACTGCTTTTGAACCT
	A_21_P0010872	ANTXRLP1	5.39745e-17	1.49492e-18	-4.16167	down	-4.1781	down	-3.59705	down	Homo sapiens anthrax toxin receptor-like pseudogene 1 (ANTXRLP1), transcript variant 1, non-coding RNA [NR_103827]	anthrax toxin receptor-like pseudogene 1	GGAAAAACTCCCAGGTATCCCAAAGAGAGGCAGCAGATACAAGAAACAAGGAGATTCAAA
	A_32_P128209	LINC01554	5.43312e-17	1.50587e-18	4.8227	up	4.09841	up	4.7426	up	Homo sapiens long intergenic non-protein coding RNA 1554 (LINC01554), long non-coding RNA [NR_026936]	long intergenic non-protein coding RNA 1554	CCTAAGAAGTTCCCTGAACCCCATTCTTTGTTGTGGCTAACTGGTCCCCTTGGAATTTTT
	A_32_P161913	TMEM240	5.47737e-17	1.51921e-18	4.55198	up	3.78483	up	4.59039	up	Homo sapiens transmembrane protein 240 (TMEM240), mRNA [NM_001114748]	transmembrane protein 240	GCGAGGGGAGCACCCGCGTGTGCACAGCCACAGGGTGGGGTGCAGGTGGCTGGGCCCAGG
	A_23_P34676	CD247	5.49357e-17	1.52479e-18	-3.47222	down	-3.80463	down	-3.41228	down	Homo sapiens CD247 molecule (CD247), transcript variant 1, mRNA [NM_198053]	CD247 molecule	CAAAGTGGCATAAAAAACATGTGGTTACACAGTGTGAATAAAGTGCTGCGGAGCAAGAGG
	A_33_P3227934	lnc-C16orf42-2	5.55574e-17	1.54314e-18	4.30511	up	3.92286	up	4.34488	up	Homo sapiens cDNA FLJ45052 fis, clone BRAWH3022542. [AK126997]	lnc-C16orf42-2:1	TGGGGACCGCGGGGAGTGACCACATTCATTCATTCCCTCCCTCACTCATTCATTCATTCC
	A_21_P0012893	lnc-MYO10-1	5.66101e-17	1.5735e-18	7.5579	up	7.35528	up	7.70498	up	Homo sapiens cDNA FLJ43202 fis, clone FEBRA2008360. [AK125192]	lnc-MYO10-1:1	GGGAGGCAGACGTCAAAGGCAAGTACATCTGTATTCAACTGGGTAAAGGAAGAGTTTTTC
	A_19_P00802814	LOC729296	5.7701e-17	1.60495e-18	3.74289	up	2.36566	up	2.66005	up	Homo sapiens uncharacterized LOC729296 (LOC729296), transcript variant 1, long non-coding RNA [NR_109916]	uncharacterized LOC729296	AAACCGTGGAATGAAACAGGACGTGCCTTGTTGAGATCAAAGGGCTTCTGTTACCTTCTT
	A_32_P160883	NEDD4	5.83774e-17	1.62607e-18	3.89679	up	3.29464	up	2.33882	up	Homo sapiens neural precursor cell expressed, developmentally down-regulated 4, E3 ubiquitin protein ligase (NEDD4), transcript variant 2, mRNA [NM_198400]	neural precursor cell expressed, developmentally down-regulated 4, E3 ubiquitin protein ligase	CTCGTGGTCTGGAAGAAACATCTATCAAGCAACACAGCCCCTTATCCCAGATAGAAAAGT
	A_33_P3300212	BLCAP	5.83774e-17	1.62607e-18	-2.18171	down	-2.24607	down	-2.27479	down	Homo sapiens bladder cancer associated protein (BLCAP), transcript variant 2, mRNA [NM_001167820]	bladder cancer associated protein	TGGGGAAACTGTTTCCTGTACCACTGCTCCGATTCCCCGCTTCCAGAATCGGCGCATGAT
	A_33_P3340105	BASP1P1	5.84723e-17	1.62986e-18	4.24613	up	4.181	up	3.90558	up	Homo sapiens brain abundant, membrane attached signal protein 1 pseudogene 1 (BASP1P1), non-coding RNA [NR_033774]	brain abundant, membrane attached signal protein 1 pseudogene 1	AAACCTAAAAAGACTAAGGCGCCTGCAGCTCCTGCCACCCAGGAGACCATAAGTGACGGG
	A_32_P28939	ALKBH2	5.88075e-17	1.64037e-18	-1.19514	down	-1.74049	down	-1.70947	down	Homo sapiens alkB, alkylation repair homolog 2 (E. coli) (ALKBH2), transcript variant 2, mRNA [NM_001001655]	alkB, alkylation repair homolog 2 (E. coli)	GCCCACGGGAGCTTACTAATGATGAACCACCCGACCAACACGCACTGGTACCACAGTCTT
	A_21_P0009366		5.90518e-17	1.64835e-18	3.73557	up	2.94377	up	3.40984	up			TAGTCCATTTGTCCTTTTCGAAGTGTGGCCTGGGACACCTCCTATCCAGCCATACGCCGC
	A_33_P3260511		6.00467e-17	1.6773e-18	5.94294	up	4.60419	up	4.17187	up	capicua transcriptional repressor pseudogene 24 [Source:HGNC Symbol;Acc:HGNC:48831] [ENST00000605464]		ATGGATCCTTCCACCTTCTGGTGCAAGAGACCTGAAAGTGTGGGCGACCTGGAGCTACCA
	A_21_P0012018		6.00796e-17	1.6794e-18	-6.83557	down	-6.57347	down	-5.69871	down	CD8b molecule [Source:HGNC Symbol;Acc:HGNC:1707] [ENST00000431506]		CACCTGTGCTGCCGGCGGAGGAGAGCCCGGCTTCGTTTCATGAAACAACTGTATAAATAG
	A_23_P258410	WNT7A	6.00906e-17	1.6809e-18	-2.67579	down	-3.62748	down	-3.16622	down	Homo sapiens wingless-type MMTV integration site family, member 7A (WNT7A), mRNA [NM_004625]	wingless-type MMTV integration site family, member 7A	AGAACATGAAGCTGGAATGTAAGTGCCACGGCGTGTCAGGCTCGTGCACCACCAAGACGT
	A_23_P123330	RPL30	6.07051e-17	1.69928e-18	-1.79993	down	-2.079	down	-2.1164	down	Homo sapiens ribosomal protein L30 (RPL30), mRNA [NM_000989]	ribosomal protein L30	TCTGAAATAGAGTACTATGCTATGTTGGCTAAAACTGGTGTCCATCACTACAGTGGCAAT
	A_19_P00317054	SATB1-AS1	6.08271e-17	1.7039e-18	-4.01855	down	-3.60998	down	-3.36186	down	Homo sapiens SATB1 antisense RNA 1 (SATB1-AS1), long non-coding RNA [NR_125803]	SATB1 antisense RNA 1	GACCTCTACATTCTTGAAATGCTCTTCTCATGGGAGACATTAAATAAGCTTTGAATTAAC
	A_33_P3306048	DPRXP4	6.09107e-17	1.70744e-18	2.08761	up	2.42316	up	2.37033	up	Homo sapiens divergent-paired related homeobox pseudogene 4 (DPRXP4), non-coding RNA [NR_002221]	divergent-paired related homeobox pseudogene 4	CTCTTCTGCCTGTTCATCTCTACAAAGTTGAGAGATGATAAATACAAAAAGTCACATGTA
	A_33_P3871347	SNED1	6.12688e-17	1.71869e-18	-1.14721	down	-2.00148	down	-2.2369	down	Homo sapiens sushi, nidogen and EGF-like domains 1 (SNED1), mRNA [NM_001080437]	sushi, nidogen and EGF-like domains 1	CAAAGAGGGCCTCCTTCCTTTCCTCTTTCATAAAAATGTTTTTTGAAGAGTTAGAGTATA
	A_23_P44781	CDKAL1	6.20978e-17	1.74317e-18	-2.8407	down	-2.40293	down	-2.79276	down	Homo sapiens CDK5 regulatory subunit associated protein 1-like 1 (CDKAL1), mRNA [NM_017774]	CDK5 regulatory subunit associated protein 1-like 1	GAAACTGGAAAACTGGATTTGTCGAAAACTAATTGTGCCCATTTTCTCACATTTTTGATC
	A_23_P37410	CYP19A1	6.23739e-17	1.75214e-18	4.99961	up	10.1435	up	5.57648	up	Homo sapiens cytochrome P450, family 19, subfamily A, polypeptide 1 (CYP19A1), transcript variant 2, mRNA [NM_031226]	cytochrome P450, family 19, subfamily A, polypeptide 1	GACATTGATTTGCTCTTACTACAGCTTCAGTGATTGGGGGAGGAAAAGTCCCAACCCAAT
	A_19_P00811178	MIR503HG	6.28401e-17	1.76648e-18	3.81256	up	3.82625	up	3.69013	up	Homo sapiens MIR503 host gene (non-protein coding) (MIR503HG), long non-coding RNA [NR_024607]	MIR503 host gene (non-protein coding)	TGGGAAATGTTTTATGATCTGTAAGTCCAAGGAATCCTCTCCCACCATTTCTTTCCCCCC
	A_24_P64407	HMX2	6.34546e-17	1.78501e-18	3.76604	up	4.05396	up	4.80962	up	Homo sapiens H6 family homeobox 2 (HMX2), mRNA [NM_005519]	H6 family homeobox 2	GCCTTTCCTCTCTCCTTCGCACTCGGACTTTAAAGAAGAGAAAGAGAGGCTCCTGCCCGC
	A_19_P00322925		6.39554e-17	1.80035e-18	5.90862	up	3.81413	up	4.17199	up	GMDS antisense RNA 1 (head to head) [Source:HGNC Symbol;Acc:HGNC:48993] [ENST00000607519]		TCATTCAGCTCATCTAACTAGGATGCTGTCCTGCCAGAGCCCTGGGGGTTCTCGTCTCCT
	A_23_P129556	IL4R	6.40668e-17	1.80475e-18	3.38144	up	2.53852	up	2.29447	up	Homo sapiens interleukin 4 receptor (IL4R), transcript variant 1, mRNA [NM_000418]	interleukin 4 receptor	GTCTGTGTGTTTTAGTTTCATCACCTGTTATCTGTGTTTGCTGAGGAGAGTGGAACAGAA
	A_23_P46369	RAB13	6.47693e-17	1.82582e-18	1.52854	up	3.21644	up	2.47266	up	Homo sapiens RAB13, member RAS oncogene family (RAB13), transcript variant 1, mRNA [NM_002870]	RAB13, member RAS oncogene family	ATCACGGATGAGAAATCTTTCGAGAATATTCAGAACTGGATGAAAAGCATCAAGGAGAAT
	A_21_P0005121		6.50057e-17	1.83504e-18	3.65717	up	3.8774	up	4.0992	up	PREDICTED: Homo sapiens uncharacterized LOC100506908 (LOC100506908), transcript variant X1, ncRNA [XR_108615]		AATTGAATATGTGAGTGCCTATGCTGTGAAGATGTAGGGATGCTCCCTGTCCTCAAGATG
	A_33_P3226177	CYFIP2	6.50057e-17	1.83397e-18	-3.57586	down	-2.52508	down	-2.86407	down	Homo sapiens cytoplasmic FMR1 interacting protein 2 (CYFIP2), transcript variant 3, mRNA [NM_014376]	cytoplasmic FMR1 interacting protein 2	GCCTACAGCCACATCTACAGCTCCTACAGGAATTTCGTGGGGCCACCTCATTTCAAGACT
	A_33_P3258581	PTGES2-AS1	6.5051e-17	1.8376e-18	3.33383	up	3.41071	up	3.32684	up	Homo sapiens PTGES2 antisense RNA 1 (head to head) (PTGES2-AS1), long non-coding RNA [NR_024425]	PTGES2 antisense RNA 1 (head to head)	CATGTTTCATACAGGTATCAAAGTATCACATGTACCCCCAAAGTATGTACAACTATGATA
	A_23_P120822	UPB1	6.58727e-17	1.86212e-18	4.47117	up	6.29391	up	4.84338	up	Homo sapiens ureidopropionase, beta (UPB1), mRNA [NM_016327]	ureidopropionase, beta	AAGTGTGGCAGGCTTAACATGTCCAGGTTCTCCCCAATAACATTGTCCAGGTTGGTTTTA
	A_21_P0013999		6.5922e-17	1.8654e-18	4.27368	up	5.00095	up	5.06987	up			GGGGACAAATGGGGGTGCTGGAGAGACAGGAGTCCCAAAATTTCACAGATGCTGCCGTGA
	A_23_P218463	SERTAD1	6.5922e-17	1.86643e-18	1.98045	up	1.4492	up	1.46244	up	Homo sapiens SERTA domain containing 1 (SERTAD1), mRNA [NM_013376]	SERTA domain containing 1	GTCATAGCTTGGGCTGTTCCTTCTCTGATACGGGAAGAGACCCCAATCAGATTTTTCAAA
	A_23_P59153	LSM2	6.5922e-17	1.86741e-18	-4.12594	down	-2.33313	down	-2.43617	down	Homo sapiens LSM2 homolog, U6 small nuclear RNA associated (S. cerevisiae) (LSM2), mRNA [NM_021177]	LSM2 homolog, U6 small nuclear RNA associated (S. cerevisiae)	GAACCCTCCATTCTGTGGATCAGTATCTCAACATCAAACTAACTGACATCAGTGTCACAG
	A_21_P0014024	SATB1-AS1	6.59597e-17	1.86978e-18	-3.3999	down	-3.60802	down	-2.98588	down	Homo sapiens SATB1 antisense RNA 1 (SATB1-AS1), long non-coding RNA [NR_125803]	SATB1 antisense RNA 1	TCTATTAGCCTCTGCTCTTGTAAGAAGTTAGCTGCAGAACCCACATGTGAATCCTTGTAG
	A_33_P3814721	INSC	6.5985e-17	1.87179e-18	5.18531	up	5.61453	up	5.85563	up	Homo sapiens inscuteable homolog (Drosophila) (INSC), transcript variant 1, mRNA [NM_001031853]	inscuteable homolog (Drosophila)	AACATGGAGGAGAGTTTTGTGTAGTGAGTGTGGGCGAAGAAATACATTTGGCTGTTCTCA
	A_21_P0014378	HKR1	6.83308e-17	1.93968e-18	-3.90663	down	-2.81043	down	-2.69393	down	HKR1, GLI-Kruppel zinc finger family member [Source:HGNC Symbol;Acc:HGNC:4928] [ENST00000592362]	HKR1, GLI-Kruppel zinc finger family member	TTTTGGATGCATTGGAAGGTCCAGATTTGGAACAAGTCTCTCTAGAGATTGAACAGAGCT
	A_23_P146084	GSR	6.86468e-17	1.95001e-18	1.75274	up	1.88841	up	1.77775	up	Homo sapiens glutathione reductase (GSR), transcript variant 1, mRNA [NM_000637]	glutathione reductase	AGACACGTGTGGCGGGCAGTGGGACCCATAGATCTTCTGAAATGAAACAAATAATCACAT
	A_33_P3399468	LOC100133182	6.88224e-17	1.95635e-18	6.31655	up	3.71077	up	3.85064	up	PREDICTED: Homo sapiens uncharacterized LOC100133182 (LOC100133182), misc_RNA [XR_429801]	uncharacterized LOC100133182	GAGCCCTTGCCTCACACCGGCCCCTCCCACGCTGAGAGAGGTCAGCCTGAGCCCTTGTCT
	A_23_P217098	VPS13A	6.88543e-17	1.95862e-18	-2.69515	down	-1.79732	down	-1.9439	down	Homo sapiens vacuolar protein sorting 13 homolog A (S. cerevisiae) (VPS13A), transcript variant A, mRNA [NM_033305]	vacuolar protein sorting 13 homolog A (S. cerevisiae)	CAGAGTATTCAATGCATGTTGTATGTGCCACCAAGTTACTATTAACTGTTTTTGGAATTG
	A_21_P0010767	LOC101929023	6.91948e-17	1.96967e-18	2.48214	up	3.33355	up	4.11297	up	Homo sapiens uncharacterized LOC101929023 (LOC101929023), transcript variant 2, long non-coding RNA [NR_125973]	uncharacterized LOC101929023	GTTTCTTCATGTTTGCTAACCCTATCTATATCTATGGTTTTGGCCAATAAATTCACTGTG
	A_33_P3324899		6.94614e-17	1.97886e-18	6.94304	up	3.2628	up	3.50062	up			ATTTTGGGGCCTAGGAACCCAGGAGCCGAGTGTAGGTGACATAGAGCAGCAGCATGAGGA
	A_23_P405110	CDC14A	6.94614e-17	1.97999e-18	-4.39995	down	-2.70516	down	-2.45177	down	Homo sapiens cell division cycle 14A (CDC14A), transcript variant 3, mRNA [NM_033313]	cell division cycle 14A	CGACCATCCAGTGAAGGAAGTATTAATAAAATTCTTTCTGGCCTAGATGATATGTCTATT
	A_21_P0010874	XLOC_l2_001960	7.02565e-17	2.00405e-18	-3.7697	down	-3.76666	down	-3.49491	down	BROAD Institute lincRNA (XLOC_l2_001960), lincRNA [TCONS_l2_00003544]		ATGATGAAACATCCATCTTTGGACACTCTCAAAGAAATAACAGCAATGGCAGGCGGTCCG
	A_33_P3214042		7.09926e-17	2.02694e-18	5.96652	up	4.2854	up	3.96908	up			TGGAAGAGCTCCGGCTCCTTCTTGCGGCGGGCATCCTTGCTGACCCAGCTGAACATACTG
	A_33_P3257671	LOC728093	7.09926e-17	2.02784e-18	5.78047	up	4.19846	up	4.28705	up	PREDICTED: Homo sapiens putative POM121-like protein 1-like (LOC728093), misc_RNA [XR_425912]	putative POM121-like protein 1-like	ATTGAACCCCATGTTGGGGTTACTACTCAATGCAATGGATGTAGGCCCCTCATATTTCTG
	A_33_P3387090		7.1073e-17	2.03154e-18	2.69623	up	3.85801	up	4.0439	up	Homo sapiens, clone IMAGE:4186245, mRNA. [BC026731]		TATATACCGAGAAACTTGGGAGCAGGGGAAAAATGATTTCGACACACCCAGCTACAGTAC
	A_24_P396650	RPS6KA1	7.12106e-17	2.03828e-18	2.61086	up	2.04592	up	1.95256	up	Homo sapiens ribosomal protein S6 kinase, 90kDa, polypeptide 1 (RPS6KA1), transcript variant 1, mRNA [NM_002953]	ribosomal protein S6 kinase, 90kDa, polypeptide 1	ATGGACTCTTCTCGGCTCAGGCTCTGCTGGTGGAAAGCGATTCACTGTATAAACTTTTTT
	A_33_P3254320	SH2D3A	7.12106e-17	2.03776e-18	-2.44239	down	-2.45939	down	-2.45566	down	Homo sapiens SH2 domain containing 3A (SH2D3A), mRNA [NM_005490]	SH2 domain containing 3A	TAGCAGTTGACTTCACCTCTGTGTCGGCCTTTAACAAAATCATAGCCATACAGCAGCTCA
	A_23_P164536	PIK3C3	7.15414e-17	2.04916e-18	2.58191	up	1.65599	up	1.57591	up	Homo sapiens phosphatidylinositol 3-kinase, catalytic subunit type 3 (PIK3C3), mRNA [NM_002647]	phosphatidylinositol 3-kinase, catalytic subunit type 3	CCTGAGTTCTGCTTCCTTGGATGTCATTGCTTAAATATAGTCTTGAAGGGCTTGTTTTGA
	A_23_P33723	CD163	7.21265e-17	2.0686e-18	5.61786	up	4.64925	up	4.27779	up	Homo sapiens CD163 molecule (CD163), transcript variant 1, mRNA [NM_004244]	CD163 molecule	ATTCACCTCTCTCACTGACTATTACAGTTGCATTTTTATGGAGTTCTTCTTCTCCTAGGA
	A_23_P113972	EXOC1	7.21265e-17	2.06876e-18	2.36623	up	1.9429	up	1.97389	up	Homo sapiens exocyst complex component 1 (EXOC1), transcript variant 3, mRNA [NM_001024924]	exocyst complex component 1	CGTGGCACAGGGCATAAGGGAGGAGGAAGTAAGTTACCAACTTGCATTTAACAAACAAGA
	A_23_P119102	VASP	7.25938e-17	2.08359e-18	4.2193	up	3.41871	up	3.22302	up	Homo sapiens vasodilator-stimulated phosphoprotein (VASP), mRNA [NM_003370]	vasodilator-stimulated phosphoprotein	GGAGGGAATTTCACATTCCCTTGTTCTAGATTCACTTTAACGCTTAATGCCTTCAAAGTT
	A_21_P0009803		7.28446e-17	2.09223e-18	-3.67019	down	-3.08916	down	-2.95292	down	PREDICTED: Homo sapiens uncharacterized LOC102723540 (LOC102723540), ncRNA [XR_424978]		TTGAGAAAGTCCACTGTGGGGAGGAAAGAGAGACTTAAACAAGCCCTGGAAAAACAAAGA
	A_21_P0014094		7.30545e-17	2.0997e-18	4.17478	up	2.80025	up	2.54772	up	Homo sapiens cDNA FLJ39330 fis, clone OCBBF2016405. [AK096649]		GTGTGGGTTTTTGTCCTCTCGAGTTTTGTCTCTAATAAAGGCCTTTTTTGTTTCAAATTA
	A_21_P0013567	RBPJ	7.30588e-17	2.10126e-18	3.04526	up	2.39142	up	2.27503	up	Homo sapiens recombination signal binding protein for immunoglobulin kappa J region (RBPJ), transcript variant 4, mRNA [NM_203284]	recombination signal binding protein for immunoglobulin kappa J region	AAATGATGGAATCATATATTCCACCAGCCTTACCTTTACCTACACACCAGAAGCAGGGCC
	A_24_P659836	SYCE3	7.32811e-17	2.1091e-18	3.66103	up	2.67616	up	2.70263	up	Homo sapiens synaptonemal complex central element protein 3 (SYCE3), mRNA [NM_001123225]	synaptonemal complex central element protein 3	GCACCCACATGAATAGCTGTATGCACTGTACTTGTTTCTTAATAAACTTATTTTTAAGCC
	A_33_P3300179		7.46729e-17	2.15063e-18	2.41772	up	2.10667	up	2.41739	up			CATTGCTGCAGCTTCTGGAACTGGGGGTCCCGGGTGAGAGCGGCCATGGCGGGACTAGAA
	A_23_P70095	CD74	7.548e-17	2.17536e-18	-1.91718	down	-2.94509	down	-2.88653	down	Homo sapiens CD74 molecule, major histocompatibility complex, class II invariant chain (CD74), transcript variant 3, mRNA [NM_001025158]	CD74 molecule, major histocompatibility complex, class II invariant chain	AAGATCAGAAGCCAGTCATGGATGACCAGCGCGACCTTATCTCCAACAATGAGCAACTGC
	A_21_P0012477	XLOC_l2_010493	7.57313e-17	2.1841e-18	4.30949	up	3.02695	up	2.97256	up	BROAD Institute lincRNA (XLOC_l2_010493), lincRNA [TCONS_l2_00019671]		GTGATTGAAAGCAATCCTTTCCTCTCTCTTCCCTCACACCTGCCTGTTTGCATTAAAGTT
	A_33_P3250887	SYCE3	7.59522e-17	2.19196e-18	4.02149	up	2.71248	up	2.80407	up	Homo sapiens synaptonemal complex central element protein 3 (SYCE3), mRNA [NM_001123225]	synaptonemal complex central element protein 3	ATGGAGAAGAACTGGCAAGAGCTGCTGCATGAGACCAAGCAAAGGCTGTAGGCCCCACTG
	A_23_P36157	WDR74	7.59929e-17	2.19464e-18	-1.71335	down	-2.01868	down	-1.99853	down	Homo sapiens WD repeat domain 74 (WDR74), mRNA [NM_018093]	WD repeat domain 74	TAGAGACCACCTATGGAGAGTACCCACTAACAGCCATGACCCTCACTCCGGGAGGCAACT
	A_33_P3405334	GM2A	7.64346e-17	2.2089e-18	3.32921	up	2.30133	up	2.01805	up	Homo sapiens GM2 ganglioside activator (GM2A), transcript variant 1, mRNA [NM_000405]	GM2 ganglioside activator	GAGTTCTGGGCTCATTTGAAGCCTGGAATAGCAATAAATCTTTTTAACTTGCGGACAGTT
	A_23_P256956	KIF20A	7.65654e-17	2.21419e-18	2.11007	up	4.41737	up	2.78397	up	Homo sapiens kinesin family member 20A (KIF20A), mRNA [NM_005733]	kinesin family member 20A	TCAAGCCTTGACCACTTGTGATGACATCTTAATCAAACAGGACCAGACTCTGGCTGAACT
	A_33_P3358750	MYBPHL	7.67158e-17	2.22005e-18	4.35865	up	5.31319	up	5.46668	up	Homo sapiens myosin binding protein H-like (MYBPHL), transcript variant 1, mRNA [NM_001010985]	myosin binding protein H-like	AGGAGCTTCGGCACCATGTCTGGTTTGGATTCATCTAAATAAATATGTGGTTCCCCAGTG
	A_23_P156788	STX11	7.74703e-17	2.24341e-18	2.62601	up	2.07044	up	2.04115	up	Homo sapiens syntaxin 11 (STX11), mRNA [NM_003764]	syntaxin 11	GGAGCTCTGCCCTGCAGGGAGTTGCCCCAACCCTTTCCGGAACTCAGTCTTTAGAAAAGA
	A_33_P3349702	LOC400927	7.81035e-17	2.26329e-18	3.66417	up	3.05076	up	3.15871	up	Homo sapiens TPTE and PTEN homologous inositol lipid phosphatase pseudogene (LOC400927), non-coding RNA [NR_002821]	TPTE and PTEN homologous inositol lipid phosphatase pseudogene	CTGCACCTGAGTACAGCACCCAGGCGTCTTCTGCAGCCCACAGAAGGTTCAGCTTAGGGC
	A_33_P3341586	SIL1	7.96725e-17	2.31033e-18	2.39825	up	2.18808	up	1.88629	up	Homo sapiens SIL1 nucleotide exchange factor (SIL1), transcript variant 1, mRNA [NM_001037633]	SIL1 nucleotide exchange factor	TTGGGAAGTCGCTTAATTGCTCTGAGCTTGTTTCCTCATCTGTCAGGAGTGCCATTAAAG
	A_23_P82324	CARD11	7.97736e-17	2.31483e-18	-3.27134	down	-3.50271	down	-3.07808	down	Homo sapiens caspase recruitment domain family, member 11 (CARD11), mRNA [NM_032415]	caspase recruitment domain family, member 11	CTGGAGGCTGGGATCGGCTGCACAAGAGACTTGATCAAGTCCAACATCTACCCCATCGTG
	A_19_P00322545	lnc-C9orf50-2	7.98862e-17	2.31967e-18	5.55501	up	2.77909	up	3.19582	up	LNCipedia lincRNA (lnc-C9orf50-2), lincRNA [lnc-C9orf50-2:1]	lnc-C9orf50-2:1	TGAAATTTTGTTCTTCTATCTTCCCCCCTTGCATGGAGAGGACCCTCATTCCTGCCCCCA
	A_24_P941188	OTUD3	8.0492e-17	2.33885e-18	-2.13778	down	-2.18948	down	-2.27297	down	Homo sapiens OTU deubiquitinase 3 (OTUD3), mRNA [NM_015207]	OTU deubiquitinase 3	CCACGGATTGTGTTCATCTGAACCATTTTATTTTTTATTTACCAAAGTACTGTACTTGGC
	A_33_P3304764		8.05292e-17	2.34152e-18	4.93401	up	3.93717	up	3.95867	up			ATATACGTTTTTTCTTTTTGATACCGGGTCTCACACTGTCACCCAGGCTGGAGTACAGTG
	A_24_P156748	SLC30A2	8.06353e-17	2.34619e-18	4.96615	up	4.19099	up	4.25939	up	Homo sapiens solute carrier family 30 (zinc transporter), member 2 (SLC30A2), transcript variant 1, mRNA [NM_001004434]	solute carrier family 30 (zinc transporter), member 2	ACCTGTCCCCGACTCATCGAGACAACATGCCCAGTTATCAGGGAGTCCTGTGTCACAAGG
	A_23_P161522	TMEM134	8.09327e-17	2.35804e-18	-1.81949	down	-2.20259	down	-2.19597	down	Homo sapiens transmembrane protein 134 (TMEM134), transcript variant 1, mRNA [NM_025124]	transmembrane protein 134	GCTTCCTGTTGTTGGTGCCTGGAGTCTATCACGTGATCTTCATCTACTGCGCGGTCAAGG
	A_21_P0002475	ANKRD36	8.09327e-17	2.35647e-18	-6.61258	down	-3.73295	down	-3.71421	down	Homo sapiens ankyrin repeat domain 36 (ANKRD36), mRNA [NM_001164315]	ankyrin repeat domain 36	CTGAGAATATTTCAGAACCATACTTTACAAACAGAAGGACTATTTCTCAACAATCTGCAG
	A_21_P0014276	lnc-POLR2L-1	8.11267e-17	2.36529e-18	3.24935	up	2.59316	up	2.77794	up	LNCipedia lincRNA (lnc-POLR2L-1), lincRNA [lnc-POLR2L-1:2]	lnc-POLR2L-1:2	AGGGGTTGGGCCGGTTCAGGAGGCCTGGGGTTGGGGAGAGAAGGGATTCTCAGTTCATCA
	A_23_P370989	MCM4	8.13368e-17	2.37302e-18	-3.35657	down	-1.47111	down	-1.78183	down	Homo sapiens minichromosome maintenance complex component 4 (MCM4), transcript variant 1, mRNA [NM_005914]	minichromosome maintenance complex component 4	ATTTTATCTAAGGGCAAAACACCAGCTCTAAAATACCAGCAACTTTTTGAAGATATTCGG
	A_33_P3380126	MORN3	8.20368e-17	2.39506e-18	-2.62203	down	-3.14014	down	-2.6292	down	Homo sapiens MORN repeat containing 3 (MORN3), mRNA [NM_173855]	MORN repeat containing 3	AGGCTTCTGGGTGGACAATATGGCCAAATGCGGGACGATGATCGACTTTGGCCGTGACGA
	A_23_P81934	C6orf25	8.24853e-17	2.40978e-18	1.42667	up	2.54182	up	2.61996	up	Homo sapiens chromosome 6 open reading frame 25 (C6orf25), transcript variant 1, mRNA [NM_025260]	chromosome 6 open reading frame 25	CTCCACTTGTGAAAACCGAGCCCCAGAGGCCAGTAAAGGAGGAAGAGCCCAAGATTCCAG
	A_23_P204079	NPFF	8.30321e-17	2.42739e-18	2.11304	up	2.28131	up	2.31221	up	Homo sapiens neuropeptide FF-amide peptide precursor (NPFF), mRNA [NM_003717]	neuropeptide FF-amide peptide precursor	CTTGATATGTCTGCATGCAAGGTCCACACCCAAAAGTGTCAATGTTTGCCCCCCAAATAA
	A_21_P0000772	OSER1-AS1	8.30984e-17	2.43097e-18	-3.01236	down	-2.69423	down	-2.46736	down	Homo sapiens OSER1 antisense RNA 1 (head to head) (OSER1-AS1), transcript variant 1, long non-coding RNA [NR_038337]	OSER1 antisense RNA 1 (head to head)	ATTGAAGGAGTTGAGGCACGAGCTTGAACAGGGTTGCATGTTTGGCCCTTGATTGTAAAT
	A_33_P3360216	HIST1H2AI	8.35765e-17	2.4466e-18	1.02228	up	2.08419	up	1.79413	up	Homo sapiens histone cluster 1, H2ai (HIST1H2AI), mRNA [NM_003509]	histone cluster 1, H2ai	TGGATTAGTTTGCAGCAACTCAATCCCAAAGGAACCAAAGGCTCTTTTCAGAGCCACCTA
	A_24_P63030	SFXN5	8.36195e-17	2.44951e-18	2.73031	up	2.62084	up	2.43047	up	Homo sapiens sideroflexin 5 (SFXN5), mRNA [NM_144579]	sideroflexin 5	GATGCCCTTCTTCCATTCCCAGACAGCAGTGTGAGGGTGCAGGGACCAAGATGTCAAGCT
	A_19_P00328996	LINC00963	8.45974e-17	2.47982e-18	2.22489	up	1.58526	up	1.75141	up	long intergenic non-protein coding RNA 963 [Source:HGNC Symbol;Acc:HGNC:48716] [ENST00000419300]	long intergenic non-protein coding RNA 963	TTGTTATTAGTGTCTGTTGAAAAAGACCCTGAGCTATACCAGCCCTTGGTTCTCCAGCCT
	A_33_P3243657	TIMM10B	8.50809e-17	2.49679e-18	-1.26803	down	-1.60364	down	-1.71229	down	Homo sapiens translocase of inner mitochondrial membrane 10 homolog B (yeast) (TIMM10B), mRNA [NM_012192]	translocase of inner mitochondrial membrane 10 homolog B (yeast)	GGAGGACCCTTCCACATCAACATTTGTGTGTATCCTTGCAATAAACTTCCATTGTGAATT
	A_23_P252155	STRBP	8.50809e-17	2.49735e-18	-2.83482	down	-2.14781	down	-2.42145	down	Homo sapiens spermatid perinuclear RNA binding protein (STRBP), transcript variant 1, mRNA [NM_018387]	spermatid perinuclear RNA binding protein	CCAACATATCCTGTTCCCCACTACTCATTCTTTTAGCAAATGACAGAAGCTAATTCCTAT
	A_19_P00322184	LINC01503	8.5812e-17	2.5205e-18	2.7722	up	2.48208	up	2.15172	up	Homo sapiens long intergenic non-protein coding RNA 1503 (LINC01503), transcript variant 1, long non-coding RNA [NR_120685]	long intergenic non-protein coding RNA 1503	GAAAGTTCTTTCCCTGAGGACCATCTGGAGTGGACGCGTGCACTACCCCTCTCTGAATAC
	A_23_P355776	LINC00266-1	8.60672e-17	2.52969e-18	2.30325	up	4.12613	up	3.49577	up	Homo sapiens long intergenic non-protein coding RNA 266-1 (LINC00266-1), long non-coding RNA [NR_040415]	long intergenic non-protein coding RNA 266-1	AAGAAAGACAAACATCCTGATCCATATGAATTCCTCTTATTAAGAAAAATAAAGCATCCA
	A_24_P336577	FAM212B	8.64571e-17	2.54286e-18	2.96085	up	2.19963	up	2.60284	up	Homo sapiens family with sequence similarity 212, member B (FAM212B), transcript variant 1, mRNA [NM_019099]	family with sequence similarity 212, member B	AATCCCTCTGACATCTCCACTGCCCCCAAAGACCTCCGTTGAACATTCTGTATGGAAAAG
	A_33_P3306068	MYCL	8.65306e-17	2.54672e-18	1.35469	up	-2.07982	down	-1.85989	down	Homo sapiens v-myc avian myelocytomatosis viral oncogene lung carcinoma derived homolog (MYCL), transcript variant 1, mRNA [NM_001033081]	v-myc avian myelocytomatosis viral oncogene lung carcinoma derived homolog	GTATTTAGTTGTGATTACTGATTGCCTGATTTTAAAATGTTGCCTTCTGGGACATCTTCT
	A_33_P3247210		8.65832e-17	2.55169e-18	6.4266	up	4.06361	up	4.38755	up			TTATCTTTCCCTTTTACTTAGGCAAATCACTCACCTCCCCCGAGTCCGGTCACTGCGGAG
	A_33_P3344405	MEF2B	8.65832e-17	2.55007e-18	2.50977	up	3.11591	up	2.85958	up	Homo sapiens myocyte enhancer factor 2B (MEF2B), mRNA [NM_001145785]	myocyte enhancer factor 2B	ATCCACCCTGGGGGGCTCCTTTCCTTCTTCCTATTTGTGTGTATATCCACAAATAAAACG
	A_24_P14531	TM9SF4	8.81689e-17	2.60015e-18	2.92604	up	1.76232	up	1.64444	up	Homo sapiens transmembrane 9 superfamily protein member 4 (TM9SF4), mRNA [NM_014742]	transmembrane 9 superfamily protein member 4	AAGAGATTCTCTTTTTAGGGGGAATGGGAAACGGACACCTCATAAAGGGTTCAAAGATCA
	A_24_P401830	MATN1-AS1	8.89759e-17	2.62571e-18	-2.23773	down	-2.52363	down	-2.74255	down	Homo sapiens MATN1 antisense RNA 1 (MATN1-AS1), long non-coding RNA [NR_034182]	MATN1 antisense RNA 1	TCACTCTAAACCAACTCACTTCTTAAAGATTTCTCTGCCTTATAAGAAATAATAGCCATG
	A_33_P3560878	LINC01146	9.02632e-17	2.66548e-18	1.30828	up	2.42073	up	1.53262	up	Homo sapiens long intergenic non-protein coding RNA 1146 (LINC01146), long non-coding RNA [NR_046094]	long intergenic non-protein coding RNA 1146	CTCCAAACTCTTGACCCACAGAACCTGTGAGAAAATATATGGATATTATTTTAAACTGCT
	A_24_P26177	VPRBP	9.17705e-17	2.7136e-18	-3.34263	down	-2.50839	down	-2.59545	down	Homo sapiens Vpr (HIV-1) binding protein (VPRBP), transcript variant 1, mRNA [NM_014703]	Vpr (HIV-1) binding protein	AAACCTATAGCAACCATTGATGTGAAACGGAACATCTTTGACCTGTGTACAGACACCAAA
	A_32_P47988	CAMK2D	9.17705e-17	2.71219e-18	-3.23382	down	-2.96675	down	-2.70053	down	Homo sapiens calcium/calmodulin-dependent protein kinase II delta (CAMK2D), transcript variant 3, mRNA [NM_001221]	calcium/calmodulin-dependent protein kinase II delta	GGATCATCAGAAACTAGAAAGAGAAGCTAGAATCTGCCGTCTTTTGAAGCACCCTAATAT
	A_33_P3253804	CEBPD	9.19258e-17	2.72001e-18	2.98201	up	2.00091	up	2.18672	up	Homo sapiens CCAAT/enhancer binding protein (C/EBP), delta (CEBPD), mRNA [NM_005195]	CCAAT/enhancer binding protein (C/EBP), delta	TTCAAGCAGCTGCCCAGCCCGCCCTTCCTGCCGGCCGCCGGGACAGCAGACTGCCGGTAA
	A_23_P167599	FAM134B	9.22315e-17	2.73087e-18	-1.98169	down	-2.8282	down	-2.7249	down	Homo sapiens family with sequence similarity 134, member B (FAM134B), transcript variant 1, mRNA [NM_001034850]	family with sequence similarity 134, member B	ACTGAAGACTTTGAACACTTGCTTTTTGTGATTGCTTATGTCATTAGTGCCTCATGACTG
	A_23_P210048	HDAC4	9.27905e-17	2.74925e-18	2.3584	up	2.07975	up	2.20178	up	Homo sapiens histone deacetylase 4 (HDAC4), mRNA [NM_006037]	histone deacetylase 4	TGGAGGAATTTTGTTTTGTTTTGTTTTGTTTGTTTCCTTTTATCTCCTTCCACGGGCCAG
	A_21_P0011818	XLOC_l2_007427	9.41717e-17	2.79389e-18	3.93023	up	2.84228	up	3.22191	up	BROAD Institute lincRNA (XLOC_l2_007427), lincRNA [TCONS_l2_00013792]		CCAGAGAACTTGGCAAGTGTGGTGGCATGAGAGTCTGATTGGCCTGAGGTCAGGAGAAGA
	A_24_P925799		9.41717e-17	2.79314e-18	-4.6092	down	-3.77614	down	-3.51897	down	T cell receptor beta variable 7-4 (gene/pseudogene) [Source:HGNC Symbol;Acc:HGNC:12238] [ENST00000390369]		GATGTAGCTCTCAGGTGTGATTCAATTTCGGGTCATGTAACCCTTTATTGGTACCGACAG
	A_23_P417383	ASPRV1	9.45613e-17	2.80731e-18	4.68662	up	1.95825	up	3.64327	up	Homo sapiens aspartic peptidase, retroviral-like 1 (ASPRV1), mRNA [NM_152792]	aspartic peptidase, retroviral-like 1	TCTGTCATTTGCTTTGAAGCCCATTGTGCCTTATGCCAATAATTCAATTGCTGCAAACAC
	A_24_P188878	RPL34	9.46227e-17	2.811e-18	-1.74118	down	-2.01365	down	-2.06386	down	Homo sapiens ribosomal protein L34 (RPL34), transcript variant 2, mRNA [NM_033625]	ribosomal protein L34	TGTTTACCTTTATACCAAGAAGGTTGGGAAAGCACCAAAATCTGCATGTGGTGTGTGCCC
	A_33_P3370434	LINC01336	9.54663e-17	2.83794e-18	-5.01869	down	-4.71604	down	-4.27538	down	Homo sapiens long intergenic non-protein coding RNA 1336 (LINC01336), long non-coding RNA [NR_126375]	long intergenic non-protein coding RNA 1336	CAAGCTCTAAAACCTAAGAGTTTTGTGCTAAAGTCTAGATTTAACCAAGAGATTCAGGTT
	A_33_P3305320	LINC01000	9.58629e-17	2.85162e-18	3.24088	up	2.62934	up	2.56431	up	capicua transcriptional repressor pseudogene 27 [Source:HGNC Symbol;Acc:HGNC:48835] [ENST00000442987]	long intergenic non-protein coding RNA 1000	GGGCAGTTTCCCTCCTCCGAGCCCCTGTACATTCCATGAATTGTGGGACCTTCACAGCTT
	A_33_P3422888	CLEC16A	9.61303e-17	2.86147e-18	1.91732	up	2.24766	up	2.05096	up	Homo sapiens C-type lectin domain family 16, member A (CLEC16A), transcript variant 2, mRNA [NM_001243403]	C-type lectin domain family 16, member A	TGTCAAAGCACAGCGCAAGATTAAACACAGCCCCCAAAATAAATTTTGGCTTTCCCTTTA
	A_21_P0000536	ZNRF2	9.65175e-17	2.8749e-18	4.30805	up	2.68011	up	3.17595	up	Homo sapiens zinc and ring finger 2, E3 ubiquitin protein ligase (ZNRF2), mRNA [NM_147128]	zinc and ring finger 2, E3 ubiquitin protein ligase	TTTCCTCTTTCTCCGTTAATAACGGCTGGGTGGCTGGGGGAGGAGGGAAGGTGGCTCCGG
	A_32_P84373	FAM153B	9.65941e-17	2.87909e-18	-7.41046	down	-6.16493	down	-4.88396	down	Homo sapiens family with sequence similarity 153, member B (FAM153B), mRNA [NM_001265615]	family with sequence similarity 153, member B	AAAGCCGGTGGAATGTCCTGAAATGTTGGGACATTTTTAATATATTTTAGAGACCTCTGA
	A_33_P3381265	CYB5R2	9.78913e-17	2.91995e-18	3.60735	up	4.26081	up	2.48537	up	Homo sapiens cytochrome b5 reductase 2 (CYB5R2), transcript variant 1, mRNA [NM_001302826]	cytochrome b5 reductase 2	TATCTTGGTCAGAAAAGAGCTTGAAGAAATTGCCAGGACTCACCCAGACCAGTTCAACCT
	A_21_P0000230	SNORD107	9.78913e-17	2.92161e-18	-5.3815	down	-3.54563	down	-3.17094	down	Homo sapiens small nucleolar RNA, C/D box 107 (SNORD107), small nucleolar RNA [NR_001293]	small nucleolar RNA, C/D box 107	AGGACCTTGTCTGAACATAATGATTTCAAAATTTGAGCTTAAAAATGACACTCTGAAATC
	A_24_P267293	SARM1	9.91413e-17	2.96087e-18	-1.92562	down	-1.95849	down	-2.05108	down	Homo sapiens sterile alpha and TIR motif containing 1 (SARM1), mRNA [NM_015077]	sterile alpha and TIR motif containing 1	ATGGCCAGGCTATTCACACAGGCCACAGCAGAAAAGAGAGCACCTGTGAAGAAATAAATA
	A_23_P11729	ZBTB7B	9.98719e-17	2.98466e-18	2.29585	up	2.33793	up	2.15994	up	Homo sapiens zinc finger and BTB domain containing 7B (ZBTB7B), transcript variant 3, mRNA [NM_001252406]	zinc finger and BTB domain containing 7B	TTCCAATTCCAAGCTAAGAAGGTATTGGGGCAGAGGCTCCCCAAATTGGGGTGATCCCCC
	A_33_P3387561	OSCAR	1.00224e-16	2.99715e-18	3.69766	up	2.48454	up	2.42971	up	Homo sapiens osteoclast associated, immunoglobulin-like receptor (OSCAR), transcript variant 1, mRNA [NM_206818]	osteoclast associated, immunoglobulin-like receptor	GGAATGCAGGCCCCAGGACCTCCGCCCTCAGACCCAGGAGCCCAGGCCCCCAGCCTCTCC
	A_24_P256018		1.00865e-16	3.01831e-18	4.68268	up	3.45515	up	3.93896	up			TACAGCTCATTTCTCGCTCCTGCAGCCTCCAGGAATGCAAATAATTTCTCACTGGGTTTT
	A_23_P11685	PLA2G4A	1.02183e-16	3.05978e-18	3.29759	up	2.57019	up	2.19488	up	Homo sapiens phospholipase A2, group IVA (cytosolic, calcium-dependent) (PLA2G4A), mRNA [NM_024420]	phospholipase A2, group IVA (cytosolic, calcium-dependent)	GAAATGGCAGCAGTTTCTGATGCTGAGGCAGTTTGCAATCCCATGACAACTGGATTTAAA
	A_23_P53663	PAWR	1.05464e-16	3.16008e-18	-3.16645	down	-1.49287	down	-1.58502	down	Homo sapiens PRKC, apoptosis, WT1, regulator (PAWR), mRNA [NM_002583]	PRKC, apoptosis, WT1, regulator	GAAGATGTCTCAAGTAGATATTCTCGAACAGATAGAAGTGGGTTCCCTAGATATAACAGG
	A_21_P0014250	LOC100289455	1.06441e-16	3.19146e-18	-3.84375	down	-3.65731	down	-3.42544	down	Homo sapiens cDNA FLJ53529 complete cds. [AK295718]	uncharacterized LOC100289455	CCACTTGATTTTTATCTCCTTTTGGAGAGCAGGGAATTTTTTGTTCCCTGGAGCCTAGCA
	A_33_P3319486		1.0649e-16	3.19505e-18	4.12019	up	3.00453	up	2.43957	up			AGTAGTACATACACCTTTAAATGGAACTTGGTCTGAAGGGTGTGGAAATGCTGGTCCAGG
	A_33_P3351554	ETNK2	1.0707e-16	3.21455e-18	-2.34995	down	-3.44522	down	-3.5133	down	Homo sapiens ethanolamine kinase 2 (ETNK2), transcript variant 2, mRNA [NM_001297760]	ethanolamine kinase 2	GGCTCTGGCCCAGAAAGTGATTCATTTGTAAATTATCATGGTTTTCTTTCTGCATTAAAA
	A_24_P343233	HLA-DRB1	1.08674e-16	3.26484e-18	-1.10326	down	-2.1702	down	-2.0161	down	Homo sapiens major histocompatibility complex, class II, DR beta 1 (HLA-DRB1), transcript variant 1, mRNA [NM_002124]	major histocompatibility complex, class II, DR beta 1	TTCGTGCTGGGCCTGCTCTTCCTTGGGGCCGGGCTGTTCATCTACTTCAGGAATCAGAAA
	A_23_P134008	USP45	1.0974e-16	3.29903e-18	-2.81234	down	-2.0717	down	-2.05285	down	ubiquitin specific peptidase 45 [Source:HGNC Symbol;Acc:HGNC:20080] [ENST00000472914]	ubiquitin specific peptidase 45	GACTGAAAAAGGACCACTTTCTCCTAAAGTTCTTTTTAATCAGCTTTGTCAGAAGTGGGT
	A_24_P144163		1.09838e-16	3.30415e-18	-3.1914	down	-2.76823	down	-3.11886	down	ribosomal protein S4X pseudogene 17 [Source:HGNC Symbol;Acc:HGNC:36789] [ENST00000479057]		ACACCAAAGGTTGCTTTGCTGTACACGAGGAGACCAAGTACAAGTTGTGCAAAGTGAGAA
	A_21_P0006309	lnc-AL162389.1-1	1.12387e-16	3.38304e-18	5.07254	up	4.49706	up	6.16452	up	LNCipedia lincRNA (lnc-AL162389.1-1), lincRNA [lnc-AL162389.1-1:1]	lnc-AL162389.1-1:1	ATGAAGCATGGAATTCCAGACTGAGGGGCTTTACAAGTTCATCTCTCTCCCTACATCCAA
	A_23_P311875	CD6	1.13163e-16	3.40864e-18	-3.45401	down	-3.94852	down	-3.45845	down	Homo sapiens CD6 molecule (CD6), transcript variant 1, mRNA [NM_006725]	CD6 molecule	ACCAGTTCTGCAGTGACTGTCCCTGGACAATGGGTCTTTATTCTGAGTTTCCTATGGTTT
	A_24_P82106	MMP14	1.14505e-16	3.4513e-18	2.84094	up	3.38247	up	2.46975	up	Homo sapiens matrix metallopeptidase 14 (membrane-inserted) (MMP14), mRNA [NM_004995]	matrix metallopeptidase 14 (membrane-inserted)	GGACTGCCAAGCCACCCTAAGACCTTGGGAGGAAAACTCAGAGAGGGTCTTCGTTGCTCA
	A_24_P940310	URB1	1.15564e-16	3.4855e-18	-1.90421	down	-2.17123	down	-2.20943	down	Homo sapiens URB1 ribosome biogenesis 1 homolog (S. cerevisiae) (URB1), mRNA [NM_014825]	URB1 ribosome biogenesis 1 homolog (S. cerevisiae)	AGGTTGACCTCCCATCCAGCGCTGTATCTGAGTGTAGTTCATTTTATATCCATAGCCCAA
	A_23_P143569	DGCR6L	1.15953e-16	3.49952e-18	-1.66857	down	-2.23256	down	-2.23047	down	Homo sapiens DiGeorge syndrome critical region gene 6-like (DGCR6L), mRNA [NM_033257]	DiGeorge syndrome critical region gene 6-like	TACGTGACCACCAACCCACAGGAGCTGATGCTGCAGATGAACCTGCTGGAACTCATCCGA
	A_21_P0007811	lnc-DDX51-5	1.17941e-16	3.56184e-18	3.11629	up	2.60104	up	2.2513	up	LNCipedia lincRNA (lnc-DDX51-5), lincRNA [lnc-DDX51-5:1]	lnc-DDX51-5:1	GAGAGAAAACAAAGAAAGCTTCAGTCGCTCCTTCCTAAGCTGTCACGACTACTCTTTTAA
	A_23_P141505	CLEC10A	1.18866e-16	3.59213e-18	2.11985	up	-1.24659	down	-1.43415	down	Homo sapiens C-type lectin domain family 10, member A (CLEC10A), transcript variant 1, mRNA [NM_182906]	C-type lectin domain family 10, member A	AGGACTCTTCTCACGACCTCCTCGCAAGACCGCTCTGGGAGAGAAATAAGCACTGGGAGA
	A_23_P200493	LBR	1.193e-16	3.6076e-18	2.473	up	1.86623	up	1.74442	up	Homo sapiens lamin B receptor (LBR), transcript variant 1, mRNA [NM_002296]	lamin B receptor	GAGCCCTTTATCAATACAGTGCTGCAATTTCTGGATATCAGCTACACTTTGTTTTTAAGT
	A_32_P187617	TDRD3	1.1949e-16	3.61571e-18	-2.71212	down	-2.4301	down	-2.43872	down	Homo sapiens tudor domain containing 3 (TDRD3), transcript variant 2, mRNA [NM_030794]	tudor domain containing 3	AGCCAGAAAAAATACTAGAATCATCTATTCCTATGGAGTATGCAAAAATGTGGAAACCTG
[truncated: 44,692 more rows]

## Sheet: Table S2.2
	Control vs OOHCA	Up		Control vs OOHCA	Down		Control vs Abdominal	Up		Control vs Abdominal	Down		Control vs Pulmonary	Up		Control vs Pulmonary	Down
[truncated: 101 more rows]

[truncated: 13 more sheets: Table S2.3, Table S2.4, Table S2.5, Table S2.6, Table S2.7, Table S2.8, Table S2.9, Table S2.10, Table S2.11, Table S2.12, Table S2.13, Table S2.14, Table S2.15]
