# Supplementary material for: The ‘analysis of gene expression and biomarkers for point-of-care decision support in Sepsis‘ study; temporal clinical parameter analysis and validation of early diagnostic biomarker signatures for severe inflammation andsepsis-SIRS discrimination
Source: Front Immunol. 2024 Jan 25;14:1308530. doi: 10.3389/fimmu.2023.1308530 (PMC10850284; doi:10.3389/fimmu.2023.1308530)
Supplement: Supplementary file 5 [file Table_3.xlsx]

## Sheet: S5.1
Biomarker panel - Inflammation	Day	Analysis	ROC Curve Area	Standard Error	90% Confidence Interval	P Value	Cutoff >	Sensitivity %	90% CI	Specificity %	90% CI	LR +	LR -	PPV	NPV
MMP9+CD177+OLAH+HP	1	Controls vs SIRS/SEPSIS	0.9998	0.000282278	0.9992 To 1.000	< 0.0001	-4.223	99.4	97.19% to 99.97%	96.67	85.14% to 99.83%	29.8498	0.0062
ADM+FAM20A	1	Controls vs SIRS/SEPSIS	1	0	1.000 To 1.000	< 0.0001	-6.542	100	0.9782 to 1.000	100	0.8843 to 1.000		0	100	100
ADM+FAM20A+ITGA7	1	Controls vs SIRS/SEPSIS	0.9998	0.000282278	0.9992 To 1.000	< 0.0001	-6.542	100	98.22% to 100.0%	100	90.50% to 100.0%		0	100	100
ADM+FAM20A+TDRD9	1	Controls vs SIRS/SEPSIS	1	0	1.000 To 1.000	< 0.0001	-10.01	100	98.22% to 100.0%	96.67	85.14% to 99.83%	30.03	0
ADM+FAM20A+MMP9+CD177	1	Controls vs SIRS/SEPSIS	1	0	1.000 To 1.000	< 0.0001	-13.41	100	98.22% to 100.0%	100	90.50% to 100.0%		0	100	100
OLAH+FAM20A+ITGA7+MMP9+ADM	1	Controls vs SIRS/SEPSIS	1	0	1.000 To 1.000	< 0.0001	-13.42	100	98.22% to 100.0%	100	90.50% to 100.0%		0	100	100
OLAH+ADM+FAM20A	1	Controls vs SIRS/SEPSIS	1	0	1.000 To 1.000	< 0.0001	-7.121	100	98.22% to 100.0%	100	90.50% to 100.0%		0	100	100
OLAH+ADM+FAM20A+ITGA7+MMP9+CD177	1	Controls vs SIRS/SEPSIS	1	0	1.000 To 1.000	< 0.0001	-16.22	100	98.22% to 100.0%	100	90.50% to 100.0%		0	100	100
CD177+ADM+FAM20A	1	Controls vs SIRS/SEPSIS	0.9994	0.0006904	0.9983 To 1.001	< 0.0001	-6.577	98.2	95.42% to 99.51%	100	90.50% to 100.0%		0.018
FAM20A+ADM+ITGA7+MMP9	1	Controls vs SIRS/SEPSIS	1	0	1.000 To 1.000	< 0.0001	-10.05	100	98.22% to 100.0%	100	90.50% to 100.0%		0	100	100
ADM+OLAH	1	Controls vs SIRS/SEPSIS	1	0	1.000 To 1.000	< 0.0001	-5.446	100	98.22% to 100.0%	100	90.50% to 100.0%		0	100	100
ADM+ITGA7	1	Controls vs SIRS/SEPSIS	1	0	1.000 To 1.000	< 0.0001	-4.713	100	98.22% to 100.0%	100	90.50% to 100.0%		0	100	100
MMP9+FAM20A+ADM	1	Controls vs SIRS/SEPSIS	1	0	1.000 To 1.000	< 0.0001	-7.246	100	98.22% to 100.0%	100	90.50% to 100.0%		0	100	100
FAM20A+OLAH (A_32_P108254, _A_23_P161458)	1	Controls vs SIRS/SEPSIS	1	0	1.000 To 1.000	< 0.0001	-6	100	90.50% to 100.0%	100	98.22% to 100.0%		0	100	100
CD177+CYP19A1+TGFA+VSTM1+DACH1+IL10+1LR1+ADM+ALPL+FAM20A+MMP9+BMX	1	Controls vs SIRS/SEPSIS	1	0	1.000 To 1.000	< 0.0001	-24.5	100	90.50% to 100.0%	100	98.22% to 100.0%		0	100	100
ITGA7+TDRD9+FAM20A+ADM+MMP9+OLAH+HP	1	Controls vs SIRS/SEPSIS	1	0	1.000 To 1.000	< 0.0001	-19.95	100	90.50% to 100.0%	100	98.22% to 100.0%		0	100	100
ADM+OLAH+FAM20A+MMP9	1	Controls vs SIRS/SEPSIS	1	0	1.000 To 1.000	< 0.0001	-12.35	100	90.50% to 100.0%	100	98.22% to 100.0%		0	100	100
CD177+CYP19A1+MMP8+IGFBP2+METTLE7B+ITGA7+TDRD9	1	Controls vs SIRS/SEPSIS	0.9966	0.002506	0.9925 To 1.001	< 0.0001	-14.48	98.8	96.28% to 99.79%	96.67	85.14% to 99.83%	29.6697	0.0124	93.33	99.4
CD177+ILR12+OLAH+HP	1	Controls vs SIRS/SEPSIS	0.9956	0.003378	0.9901 To 1.001	< 0.0001	-21.35	99.4	97.19% to 99.97%	96.67	85.14% to 99.83%	29.8498	0.0062	99.4	96.67
FAM20A+OLAH	2	Controls vs SIRS/SEPSIS	0.9981	0.001655	0.9954 To 1.001	< 0.0001	-5.443	100	90.50% to 100.0%	98.4	95.05% to 99.71%	62.5	0	100	93.75
FAM20A+OLAH	5	Controls vs SIRS/SEPSIS	1	0	1.000 To 1.000	< 0.0001	-5.125	100	90.50% to 100.0%	98.81	94.48% to 99.94%	84.0336	0	100	96.77
FAM20A+OLAH	DISCHARGE	Controls vs SIRS/SEPSIS	0.9906	0.0066	0.9797 To 1.001	< 0.0001	-6.065	100	90.50% to 100.0%	91.3	81.20% to 96.98%	11.4943	0	100	87.5

## Sheet: S5.2
Biomarker panel - SIRS vs Sepsis	Day	Comparison	ROC Curve Area	Standard Error	90% Confidence Interval	P Value	Cut-off	Sensitivity%	95% CI	Specificity%	95% CI	Likelihood ratio
CMTM5+CETP-PLA2G7+MIA-MPP3	1	SIRS vs Abdominal Sepsis	0.9842	0.009824	0.9650 to 1.000	<0.0001	> -4.167	98.08	89.88% to 99.90%	92.31	79.68% to 97.35%	12.75
CMTM5-PLA2G7-ARHGEF10L+CETP+MIA	1	SIRS vs Abdominal Sepsis	0.9832	0.012	0.9597 to 1.000	<0.0001	> -2.969	98.08	89.88% to 99.90%	94.87	83.11% to 99.09%	19.13
CMTM5-PLA2G7-ARHGEF10L	1	SIRS vs Abdominal Sepsis	0.9794	0.0165	0.9471 to 1.000	<0.0001	> -1.321	96.08	86.78% to 99.30%	95	83.50% to 99.11%	19.22
CETP+MIA+PLXNB3-MPP3	1	SIRS vs Abdominal Sepsis	0.9763	0.01435	0.9482 to 1.000	<0.0001	> -1.614	92.31	81.83% to 96.97%	100	91.03% to 100.0%
ITGB3+CMTM5-PLA2G7-ARHGEF10L+CETP+MIA+PLXNB3-MPP3	1	SIRS vs Abdominal Sepsis	0.9724	0.01554	0.9419 to 1.000	<0.0001	> -4.980	94.23	84.36% to 98.43%	94.87	83.11% to 99.09%	18.38
CMTM5+CETP-PLA2G7-GPR124-ARHGEF10L+ITGB3-MPP3+MIA	1	SIRS vs Abdominal Sepsis	0.9719	0.01521	0.9421 to 1.000	<0.0001	> -4.758	92.31	81.83% to 96.97%	92.31	79.68% to 97.35%	12
ITGB3+CMTM5-PLA2G7-ARHGEF10L-GPR127+CETP+MIA+PLXNB3-MPP3	1	SIRS vs Abdominal Sepsis	0.9699	0.01677	0.9370 to 1.000	<0.0001	> -5.563	92.31	81.83% to 96.97%	92.31	79.68% to 97.35%	12
CETP+CMTM5-PLA2G7-ARHGEF10L-GPR124	1	SIRS vs Abdominal Sepsis	0.964	0.01967	0.9317 - 0.9964	< 0.0001	> -2.537	92.31	81.83% to 96.97%	92.31	79.68% to 97.35%	12
ITGB3-PLA2G7-ARHGEF10L	1	SIRS vs Abdominal Sepsis	0.9517	0.02171	0.9091 to 0.9942	<0.0001	> -1.862	92.31	81.83% to 96.97%	82.05	67.33% to 91.02%	5.143
ITGB3+CMTM5-PLA2G7-ARHGEF10L	1	SIRS vs Abdominal Sepsis	0.9517	0.02188	0.9088 to 0.9946	<0.0001	> -2.825	94.23	84.36% to 98.43%	84.62	70.27% to 92.75%	6.125
ITGB3+CMTM5+PF4-PLA2G7-GPR124-ARHGEF10L	1	SIRS vs Abdominal Sepsis	0.9433	0.02338	0.8975 to 0.9891	<0.0001	> -3.387	90.38	79.39% to 95.82%	84.62	70.27% to 92.75%	5.875
ITGB3-PLA2G7	1	SIRS vs Abdominal Sepsis	0.9393	0.02267	0.8949 to 0.9838	<0.0001	> -1.686	88.46	77.03% to 94.60%	82.05	67.33% to 91.02%	4.929
ITGB3+CMTM5-PLA2G7-GPR124-ARHGEF10L	1	SIRS vs Abdominal Sepsis	0.9353	0.02507	0.8861 to 0.9844	<0.0001	> -3.729	91.8	82.21% to 96.45%	84.62	70.27% to 92.75%	5.967
CETP+MIA-MPP3-PLA2G7+PLXNB3	1	SIRS vs Pulmonary Sepsis	0.9701	0.01351	0.9437 to 0.9966	<0.0001	> -4.029	91.78	83.21% to 96.18%	94.87	83.11% to 99.09%	17.9
CMTM5+CETP-PLA2G7+MIA-MPP3	1	SIRS vs Pulmonary Sepsis	0.9698	0.01408	0.9422 to 0.9974	<0.0001	> -4.152	94.52	86.74% to 97.85%	92.31	79.68% to 97.35%	12.29
CETP+MIA-PLA2G7-GPR124	1	SIRS vs Pulmonary Sepsis	0.9659	0.01472	0.9371 to 0.9948	<0.0001	> -3.507	91.78	83.21% to 96.18%	87.18	73.29% to 94.40%	7.159
CETP+MIA-PLA2G7	1	SIRS vs Pulmonary Sepsis	0.9649	0.01434	0.9368 to 0.9930	<0.0001	> -2.898	91.78	83.21% to 96.18%	87.18	73.29% to 94.40%	7.159
ITGB3+CMTM5-PLA2G7-ARHGEF10L-GPR124+CETP+MIA+PLXNB3-MPP3	1	SIRS vs Pulmonary Sepsis	0.9571	0.01812	0.9216 to 0.9927	<0.0001	> -7.614	93.15	84.95% to 97.04%	84.62	70.27% to 92.75%	6.055
ITGB3+CMTM5-PLA2G7-ARHGEF10L+CETP+MIA+PLXNB3-MPP3	1	SIRS vs Pulmonary Sepsis	0.9568	0.01771	0.9221 to 0.9915	<0.0001	> -7.160	93.15	84.95% to 97.04%	82.05	67.33% to 91.02%	5.19
CMTM5-ARHGEF10L-GPR124-PLA2G7-MPP3+CETP+MIA	1	SIRS vs Pulmonary Sepsis	0.9499	0.0207	0.9094 to 0.9905	<0.0001	> -3.329	93.15	84.95% to 97.04%	84.62	70.27% to 92.75%	6.055
CMTM5+CETP-PLA2G7-GPR124-ARHGEF10L+ITGB3+MIA-MPP3	1	SIRS vs Pulmonary Sepsis	0.9403	0.02111	0.8989 to 0.9817	<0.0001	> -4.370	90.41	81.50% to 95.28%	82.05	67.33% to 91.02%	5.037
CMTM5-PLA2G7-ARHGEF10L	1	SIRS vs Pulmonary Sepsis	0.928	0.0246	0.8798 to 0.9762	<0.0001	> -2.681	91.78	83.21% to 96.18%	76.92	61.66% to 87.35%	3.977
ITGB3-ARHGEF10L+CMTM5-GPR124-PLA2G7-MPP3	1	SIRS vs Pulmonary Sepsis	0.9238	0.02552	0.8738 to 0.9738	<0.0001	> -4.566	90.41	81.50% to 95.28%	74.36	58.92% to 85.43%	3.526
ITGB3+CMTM5-PLA2G7-ARHGEF10L	1	SIRS vs Pulmonary Sepsis	0.9196	0.02545	0.8697 to 0.9694	<0.0001	> -3.297	89.04	79.84% to 94.34%	76.92	61.66% to 87.35%	3.858
ITGB3-ARHGEF10L+CMTM5-GPR124-PLA2G7+PF4	1	SIRS vs Pulmonary Sepsis	0.9175	0.02635	0.8658 to 0.9691	<0.0001	> -3.373	86.3	76.59% to 92.39%	79.49	64.47% to 89.22%	4.207
ITGB3-PLA2G7-GPR124+CMTM5-ARHGEF10L	1	SIRS vs Pulmonary Sepsis	0.9164	0.0263	0.8649 to 0.9680	<0.0001	> -3.588	89.04	79.84% to 94.34%	74.36	58.92% to 85.43%	3.473
ITGB3-ARHGEF10L	1	SIRS vs Pulmonary Sepsis	0.8946	0.02934	0.8371 to 0.9521	<0.0001	> -1.581	86.3	76.59% to 92.39%	74.36	58.92% to 85.43%	3.366
CMTM5+CETP-PLA2G7+MIA-MPP3	1	SIRS VS SEPSIS	0.9758	0.01067	0.9582 - 0.9933	< 0.0001	> -4.167	96	90.98% to 98.28%	92.31	79.68% to 97.35%	12.48
CMTM5-PLA2G7-ARHGEF10L+CETP+MIA	1	SIRS VS SEPSIS	0.9727	0.01205	0.9491 to 0.9963	<0.0001	> -3.261	93.6	87.88% to 96.72%	92.31	79.68% to 97.35%	12.17
CETP+MIA+PLXNB3-MPP3	1	SIRS VS SEPSIS	0.9719	0.01067	0.9510 to 0.9928	<0.0001	> -3.810	94.4	88.89% to 97.26%	84.62	70.27% to 92.75%	6.136
CMTM5+CETP-PLA2G7-GPR124-ARHGEF10L+ITGB3+MIA-MPP3	1	SIRS VS SEPSIS	0.9653	0.01487	0.9362 to 0.9945	<0.0001	> -4.861	92	85.90% to 95.60%	92.31	79.68% to 97.35%	11.96
ITGB3+CMTM5-PLA2G7-ARHGEF10L-GPR124+CETP+MIA+PLXNB3-MPP3	1	SIRS VS SEPSIS	0.9625	0.0155	0.9321 to 0.9928	<0.0001	> -8.039	96	90.98% to 98.28%	82.05	67.33% to 91.02%	5.349
ITGB3+CMTM5-PLA2G7-ARHGEF10L+CETP+MIA+PLXNB3-MPP3	1	SIRS VS SEPSIS	0.9625	0.0155	0.9321 to 0.9928	<0.0001	> -8.039	96	90.98% to 98.28%	82.05	67.33% to 91.02%	5.349
CMTM5+CETP-PLA2G7-GPR124-ARHGEF10L	1	SIRS VS SEPSIS	0.9506	0.01934	0.9127 to 0.9885	<0.0001	> -3.394	91.2	84.93% to 95.02%	84.62	70.27% to 92.75%	5.928
CMTM5-PLA2G7-ARHGEF10L	1	SIRS VS SEPSIS	0.9444	0.01997	0.9053 to 0.9836	<0.0001	> -1.991	92	85.90% to 95.60%	87.18	73.29% to 94.40%	7.176
ITGB3+CMTM5-PLA2G7-GPR124-ARHGEF10L	1	SIRS VS SEPSIS	0.9333	0.02231	0.8896 to 0.9771	<0.0001	> -4.343	92	85.90% to 95.60%	71.79	56.22% to 83.46%	3.262
ITGB3+CMTM5-PLA2G7-ARHGEF10L	1	SIRS VS SEPSIS	0.9329	0.02135	0.8911 to 0.9748	<0.0001	> -3.641	93.6	87.88% to 96.72%	71.79	56.22% to 83.46%	3.319
ITGB3-PLA2G7-ARHGEF10L	1	SIRS VS SEPSIS	0.9313	0.02102	0.8901 to 0.9725	<0.0001	> -2.588	91.2	84.93% to 95.02%	76.92	61.66% to 87.35%	3.952
ITGB3+CMTM5+PF4-PLA2G7-GPR124-ARHGEF10L	1	SIRS VS SEPSIS	0.9282	0.02265	0.8838 to 0.9726	<0.0001	> -3.607	86.4	79.30% to 91.33%	82.05	67.33% to 91.02%	4.814

## Sheet: S5.3
GEO Dataset	Study	Contributors	Overall Design	PMID	Panel	Cases	Controls	ROC Area	Standard Error	90% CI	P Value	Cutoff >	Sensitivity %	90% CI	Specificity %	90% CI	LR +	LR -
GSE154918***	RNAseq analysis of blood from sepsis patients and healthy controls	Schughart K	RNASeq, Blood	33640018	OLAH+FAM20A	Inf1, Sepsis, Septic shock	Healthy	1	0	1.000 To 1.000	< 0.0001	-0.2998	100	95.50% to 100.0%	100	92.22% to 100.0%		0
					OLAH+FAM20A+ADM+ITGA7+MMP9	Inf1, Sepsis, Septic shock	Healthy	1	0	1.000 To 1.000	< 0.0001	-0.5504	100	95.50% to 100.0%	100	92.22% to 100.0%		0
					OLAH+FAM20A+ADM	Inf1, Sepsis, Septic shock	Healthy	1	0	1.000 To 1.000	< 0.0001	-0.3681	100	95.50% to 100.0%	100	92.22% to 100.0%		0
GSE131761***	Gene expression patterns in septic and non-septic shock postsurgical patients	Martínez-Paz P Tamayo E García-Morán E	Microarray, PCR	34144116	OLAH+FAM20A+ADM	Septic shock, non septic shock	control	0.9994	0.000827	0.9981 To 1.001	< 0.0001	-0.6213	99.12	95.91% to 99.96%	100	81.90% to 100.0%		0.0088
					OLAH+FAM20A+ADM+ITGA7+MMP9	Septic shock, non septic shock	control	0.9994	0.000827	0.9981 To 1.001	< 0.0001	-1.024	99.12	95.91% to 99.96%	100	81.90% to 100.0%		0.0088
					OLAH+FAM20A+ADM+ITGA7+MMP9	Septic shock	control	1	0	1.000 To 1.000	< 0.0001	-1.024	100	96.32% to 100.0%	100	81.90% to 100.0%		0
					OLAH+FAM20A+ADM	Septic shock	control	1	0	1.000 To 1.000	< 0.0001	-0.6055	100	96.32% to 100.0%	100	81.90% to 100.0%		0
					OLAH+FAM20A	Septic shock, non septic shock	control	0.9988	0.0014	0.9965 To 1.001	< 0.0001	-0.6136	98.25	94.58% to 99.69%	100	81.90% to 100.0%		0.0175
					OLAH+FAM20A	Septic shock	control	0.9992	0.0012	0.9972 To 1.001	< 0.0001	-0.5908	98.75	94.21% to 99.94%	100	81.90% to 100.0%		0.0125
GSE28750	Development and Validation of a Novel Molecular Biomarker Diagnostic Test for the Early Detection of Sepsis	Sutherland A, Thomas M, Brandon RA, Brandon RB, Lipman J, Tang B, McLean A, Pascoe R, Price G, Nguyen T, Stone G, Venter D	Microarray, Paxgene	21682927	OLAH+FAM20A+ADM	Sepsis, Post-surgical	Healthy	1	0	1.000 To 1.000	< 0.0001	28.09	100	86.71% to 100.0%	100	86.09% to 100.0%		0
					OLAH+FAM20A+ADM+ITGA7+MMP9	Sepsis, Post-surgical	Healthy	1	0	1.000 To 1.000	< 0.0001	36.45	100	86.71% to 100.0%	100	86.09% to 100.0%		0
					OLAH+FAM20A	Sepsis, Post-surgical	Healthy	1	0	1.000 To 1.000	< 0.0001	55.34	100	86.71% to 100.0%	100	86.09% to 100.0%		0
					OLAH+FAM20A+ADM	Sepsis	Healthy	1	0	1.000 To 1.000	< 0.0001	30.91	100	74.11% to 100.0%	100	86.09% to 100.0%		0
					OLAH+FAM20A+ADM+ITGA7+MMP9	Sepsis	Healthy	1	0	1.000 To 1.000	< 0.0001	39.1	100	74.11% to 100.0%	100	86.09% to 100.0%		0
					OLAH+FAM20A	Sepsis	Healthy	1	0	1.000 To 1.000	< 0.0001	58.34	100	74.11% to 100.0%	100	86.09% to 100.0%		0
GSE65682	Genome-wide blood transcriptional profiling in critically ill patients - MARS consortium	Scicluna BP, van der Poll T	Blood microarray	26121490	OLAH+FAM20A+ADM	Abdominal sepsis	Healthy	1	0	1.000 To 1.000	< 0.0001	-1.487	100	94.30% to 100.0%	100	93.12% to 100.0%		0
					OLAH+FAM20A+ADM	Abdominal sepsis	Control GI	0.803	0.04488	0.7292 To 0.8768	< 0.0001	0.0108	70.59	58.38% to 80.92%	71.43	57.86% to 82.61%	2.4708	0.4117
					OLAH+FAM20A+ADM+ITGA7+MMP9	Abdominal sepsis	Healthy	1	0	1.000 To 1.000	< 0.0001	-2.385	100	94.30% to 100.0%	100	93.12% to 100.0%		0
					OLAH+FAM20A+ADM+ITGA7+MMP9	Abdominal sepsis	Control GI	0.8754	0.03529	0.8173 To 0.9334	< 0.0001	0.123	86.27	75.76% to 93.38%	78.57	65.58% to 88.34%	4.0257	0.1747
					OLAH+FAM20A	Abdominal sepsis	Healthy	1	0	1.000 To 1.000	< 0.0001	-1.233	100	94.30% to 100.0%	100	93.12% to 100.0%		0
					OLAH+FAM20A	Abdominal sepsis	Control GI	0.8184	0.04359	0.7467 To 0.8901	< 0.0001	0.1435	74.51	62.56% to 84.21%	73.81	60.39% to 84.56%	2.845	0.3453
GSE161731	Dysregulated transcriptional responses to SARS-CoV-2 in the periphery support novel diagnostic approaches	McClain M Constantine F Liu Y, Burke T	RNASeq, Blood	33597532	OLAH+FAM20A	Bacterial Infection	Healthy	0.9978	0.003101	0.9927 To 1.003	< 0.0001	2.166	95.83	81.71% to 99.79%	100	85.41% to 100.0%		0.0417
					OLAH+FAM20A	Bacterial Infection	Healthy, COVID-19, CoV other, Influenza	0.9788	0.01104	0.9606 To 0.9970	< 0.0001	3.074	95.83	81.71% to 99.79%	92.4	88.18% to 95.44%	12.6092	0.0451
					OLAH+FAM20A+ADM	Bacterial Infection	Healthy	1	0	1.000 To 1.000	< 0.0001	7.74	100	88.27% to 100.0%	100	85.41% to 100.0%		0
					OLAH+FAM20A+ADM	Bacterial Infection	Healthy, COVID-19, CoV other, Influenza	0.9817	0.0101	0.9652 To 0.9983	< 0.0001	10.28	95.83	81.71% to 99.79%	93.57	89.58% to 96.35%	14.9036	0.0446
					OLAH+FAM20A+ADM+ITGA7+MMP9	Bacterial Infection	Healthy	0.9737	0.01859	0.9431 To 1.004	< 0.0001	20.15	95.83	81.71% to 99.79%	89.47	70.42% to 98.10%	9.1007	0.0466
					OLAH+FAM20A+ADM+ITGA7+MMP9	Bacterial Infection	Healthy, COVID-19, CoV other, Influenza	0.972	0.0125	0.9514 To 0.9925	< 0.0001	20.15	95.83	81.71% to 99.79%	88.3	83.46% to 92.11%	8.1906	0.0472
					OLAH+FAM20A+ADM+ITGA7+MMP9	Influenza	Healthy	0.4671	0.1126	0.2818 To 0.6524	0.7405	15.98	50	27.86% to 72.14%	36.84	18.75% to 58.19%	0.7916	1.3572
					OLAH+FAM20A+ADM+ITGA7+MMP9	COVID-19	Healthy	0.3377	0.0612	0.2370 To 0.4383	0.02896	14.99	49.35	39.48% to 59.26%	31.58	14.75% to 53.00%	0.7213	1.6039
					OLAH+FAM20A+ADM+ITGA7+MMP9	CoV other	Healthy	0.3961	0.07478	0.2731 To 0.5191	0.1751	15.79	50.85	39.46% to 62.17%	36.84	18.75% to 58.19%	0.8051	1.3341
					OLAH+FAM20A	Influenza	Healthy	0.7434	0.07843	0.6144 To 0.8724	0.01427	0.5857	56.25	33.34% to 77.33%	89.47	70.42% to 98.10%	5.3419	0.489
					OLAH+FAM20A	COVID-19	Healthy	0.6036	0.04998	0.5213 To 0.6858	0.1636	0.1348	35.06	26.03% to 44.98%	84.21	64.06% to 95.55%	2.2204	0.7712
					OLAH+FAM20A	CoV other	Healthy	0.6525	0.05449	0.5629 To 0.7422	0.04653	0.392	44.07	33.01% to 55.58%	89.47	70.42% to 98.10%	4.1852	0.6251
					OLAH+FAM20A+ADM	Influenza	Healthy	0.4803	0.1028	0.3111 To 0.6494	0.8425	-3.626	56.25	33.34% to 77.33%	42.11	22.97% to 63.19%	0.9717	1.0389
					OLAH+FAM20A+ADM	COVID-19	Healthy	0.6391	0.07157	0.5214 To 0.7568	0.0613	-3.78	83.12	74.50% to 89.71%	42.11	22.97% to 63.19%	1.4358	0.4009
					OLAH+FAM20A+ADM	CoV other	Healthy	0.4344	0.07705	0.3077 To 0.5612	0.3922	-3.331	49.15	37.83% to 60.54%	47.37	27.39% to 67.99%	0.9339	1.0735
*Missing MPP3 and MIA cannot perform other signatures
**Missing ITGB3
*** Missing MMP9

## Sheet: S5.4
GEO Dataset	Study	Contributors	Overall Design	PMID	Panel	Cases	Controls	ROC Area	Standard Error	90% CI	P Value	Cutoff >	Sensitivity %	90% CI	Specificity %	90% CI	LR +	LR -
GSE154918	RNAseq analysis of blood from sepsis patients and healthy controls	Schughart K	RNASeq, Blood	33640018	CMTM5+ITGB3-PLA2G7-GPR124-ARHGEF10L	Shock_P	Healthy	0.9928	0.007006	0.9813 To 1.004	< 0.0001	0.2215	80	56.02% to 94.32%	100	92.22% to 100.0%		0.2
					CMTM5+ITGB3-PLA2G7-ARHGEF10L-GPR124+CETP+MIA-MPP3	Shock_P	Healthy	0.9622	0.02365	0.9233 To 1.001	< 0.0001	0.0591	93.33	72.06% to 99.66%	81.08	67.38% to 90.77%	4.9329	0.0823
					CMTM5+ITGB3-PLA2G7-GPR124-ARHGEF10L	Shock_FU	Healthy	0.9479	0.03205	0.8952 To 1.001	< 0.0001	0.006272	85.71	61.46% to 97.40%	89.19	76.95% to 96.22%	7.9288	0.1602
					CMTM5+ITGB3-PLA2G7-ARHGEF10L+CETP+MIA+PLXNB3-MPP3	Shock_P	Healthy	0.9333	0.03479	0.8761 To 0.9906	< 0.0001	-0.1285	100	81.90% to 100.0%	67.57	52.81% to 80.10%	3.0836	0
					CMTM5+ITGB3-PLA2G7-ARHGEF10L-GPR124+CETP+MIA-MPP3	Shock_FU	Healthy	0.8958	0.056	0.8036 To 0.9879	< 0.0001	0.0865	78.57	53.43% to 93.89%	86.49	73.66% to 94.52%	5.8157	0.2478
					CMTM5+MIA+CETP-MPP3-PLA2G7	Shock_P	Healthy	0.8811	0.04833	0.8016 To 0.9606	< 0.0001	0.0757	80	56.02% to 94.32%	81.08	67.38% to 90.77%	4.2283	0.2467
					CMTM5+ITGB3-PLA2G7-ARHGEF10L+CETP+MIA+PLXNB3-MPP3	Shock_FU	Healthy	0.8629	0.0682	0.7507 To 0.9751	< 0.0001	0.1883	78.57	53.43% to 93.89%	89.19	76.95% to 96.22%	7.2683	0.2403
					CMTM5+MIA+CETP-MPP3-PLA2G7	Shock_FU	Healthy	0.805	0.07905	0.6750 To 0.9351	0.0008533	-0.0188	78.57	53.43% to 93.89%	75.68	61.39% to 86.68%	3.2307	0.2832
					CMTM5+ITGB3-PLA2G7-GPR124-ARHGEF10L	Sepsis_P	Healthy	0.7643	0.06566	0.6563 To 0.8723	0.0004505	-0.12	76	58.05% to 88.99%	67.57	52.81% to 80.10%	2.3435	0.3552
					CMTM5+ITGB3-PLA2G7-GPR124-ARHGEF10L	Sepsis_FU	Healthy	0.7635	0.1658	0.4908 To 1.036	0.0866	-0.0537	75	24.86% to 98.73%	78.38	64.36% to 88.76%	3.469	0.319
					CMTM5+ITGB3-PLA2G7-ARHGEF10L-GPR124+CETP+MIA-MPP3	Sepsis_FU	Healthy	0.7635	0.1513	0.5146 To 1.012	0.08661	-0.0396	75	24.86% to 98.73%	75.68	61.39% to 86.68%	3.0839	0.3303
					CETP+MIA+PLXNB3-MPP3	Shock_P	Healthy	0.7423	0.08649	0.6001 To 0.8846	0.006595	0.0243	73.33	48.92% to 90.33%	78.38	64.36% to 88.76%	3.3918	0.3403
					CETP+MIA+PLXNB3-MPP3	Shock_FU	Healthy	0.7413	0.09466	0.5856 To 0.8970	0.0083	0.000152	71.43	46.00% to 89.60%	70.27	55.62% to 82.35%	2.4026	0.4066
					CETP+MIA+PLXNB3-MPP3	Sepsis_FU	Healthy	0.7365	0.1314	0.5203 To 0.9526	0.1241	-0.0278	75	24.86% to 98.73%	56.76	41.99% to 70.68%	1.7345	0.4405
					CMTM5+MIA+CETP-MPP3-PLA2G7	Sepsis_FU	Healthy	0.7297	0.1485	0.4854 To 0.9740	0.1352	-0.0829	75	24.86% to 98.73%	62.16	47.32% to 75.47%	1.982	0.4022
					CMTM5+ITGB3-PLA2G7-ARHGEF10L-GPR124+CETP+MIA-MPP3	Sepsis_P	Healthy	0.7189	0.07112	0.6019 To 0.8359	0.003662	-0.2108	76	58.05% to 88.99%	62.16	47.32% to 75.47%	2.0085	0.3861
					CMTM5+ITGB3-PLA2G7-ARHGEF10L+CETP+MIA+PLXNB3-MPP3	Sepsis_P	Healthy	0.6778	0.07319	0.5574 To 0.7982	0.01825	-0.1078	60	41.68% to 76.44%	70.27	55.62% to 82.35%	2.0182	0.5692
					CMTM5+MIA+CETP-MPP3-PLA2G7	Sepsis_P	Healthy	0.6551	0.0763	0.5296 To 0.7806	0.03947	-0.0469	64	45.61% to 79.76%	67.57	52.81% to 80.10%	1.9735	0.5328
					CMTM5+ITGB3-PLA2G7-ARHGEF10L+CETP+MIA+PLXNB3-MPP3	Sepsis_FU	Healthy	0.6108	0.1878	0.3019 To 0.9197	0.4259	-0.1593	60	18.93% to 92.36%	62.16	47.32% to 75.47%	1.5856	0.6435
					CETP+MIA+PLXNB3-MPP3	Sepsis_P	Healthy	0.5762	0.08476	0.4368 To 0.7157	0.3117	-0.0347	56	37.86% to 73.01%	51.35	36.81% to 65.72%	1.1511	0.8569
					CMTM5+ITGB3-PLA2G7-GPR124-ARHGEF10L	Shock_P	Inf1_P	0.9524	0.04136	0.8843 To 1.020	0.0008131	0.2301	80	56.02% to 94.32%	100	65.18% to 100.0%		0.2
					CMTM5+ITGB3-PLA2G7-ARHGEF10L-GPR124+CETP+MIA-MPP3	Shock_P	Inf1_P	0.9524	0.04404	0.8799 To 1.025	0.0008	0.0492	93.33	72.06% to 99.66%	85.71	47.93% to 99.27%	6.5311	0.0778
					CMTM5+ITGB3-PLA2G7-ARHGEF10L+CETP+MIA+PLXNB3-MPP3	Shock_P	Inf1_P	0.9238	0.05786	0.8286 To 1.019	0.0017	0.092	86.67	63.66% to 97.58%	85.71	47.93% to 99.27%	6.0651	0.1555
					CMTM5+MIA+CETP-MPP3-PLA2G7	Shock_P	Inf1_P	0.9048	0.07998	0.7732 To 1.036	0.0027	-0.0304	86.67	63.66% to 97.58%	85.71	47.93% to 99.27%	6.0651	0.1555
					CMTM5+ITGB3-PLA2G7-GPR124-ARHGEF10L	Shock_FU	Inf1_P	0.898	0.0688	0.7848 To 1.011	0.0036	0.2332	71.43	46.00% to 89.60%	100	65.18% to 100.0%		0.2857
					CMTM5+ITGB3-PLA2G7-ARHGEF10L-GPR124+CETP+MIA-MPP3	Shock_FU	Inf1_P	0.8673	0.07891	0.7375 To 0.9971	0.007236	0.0682	78.57	53.43% to 93.89%	85.71	47.93% to 99.27%	5.4983	0.25
					CETP+MIA+PLXNB3-MPP3	Sepsis_FU	Inf1_P	0.8571	0.1237	0.6536 To 1.061	0.0588	-0.0672	100	47.29% to 100.0%	71.43	34.13% to 94.66%	3.5002	0
					CMTM5+ITGB3-PLA2G7-ARHGEF10L+CETP+MIA+PLXNB3-MPP3	Shock_FU	Inf1_P	0.8571	0.08372	0.7194 To 0.9949	0.009023	0.1316	78.57	53.43% to 93.89%	85.71	47.93% to 99.27%	5.4983	0.25
					CMTM5+MIA+CETP-MPP3-PLA2G7	Shock_FU	Inf1_P	0.8469	0.09334	0.6934 To 1.000	0.01119	-0.1164	85.71	61.46% to 97.40%	71.43	34.13% to 94.66%	3	0.2001
					CETP+MIA+PLXNB3-MPP3	Shock_P	Inf1_P	0.8381	0.08589	0.6968 To 0.9794	0.01233	-0.0573	80	56.02% to 94.32%	71.43	34.13% to 94.66%	2.8001	0.28
					CETP+MIA+PLXNB3-MPP3	Shock_FU	Inf1_P	0.8367	0.08792	0.6921 To 0.9814	0.0138	-0.0578	78.57	53.43% to 93.89%	71.43	34.13% to 94.66%	2.7501	0.3
					CMTM5+MIA+CETP-MPP3-PLA2G7	Sepsis_FU	Inf1_P	0.7857	0.1473	0.5435 To 1.028	0.1306	-0.1066	75	24.86% to 98.73%	71.43	34.13% to 94.66%	2.6251	0.35
					CMTM5+MIA+CETP-MPP3-PLA2G7	Sepsis_P	Inf1_P	0.7429	0.1114	0.5597 To 0.9261	0.0527	-0.1669	72	53.78% to 86.05%	57.14	22.53% to 87.12%	1.6799	0.49
					CMTM5+ITGB3-PLA2G7-ARHGEF10L-GPR124+CETP+MIA-MPP3	Sepsis_FU	Inf1_P	0.7143	0.1844	0.4109 To 1.018	0.2568	-0.0303	75	24.86% to 98.73%	71.43	34.13% to 94.66%	2.6251	0.35
					CETP+MIA+PLXNB3-MPP3	Sepsis_P	Inf1_P	0.7029	0.104	0.5318 To 0.8739	0.1056	-0.1382	64	45.61% to 79.76%	57.14	22.53% to 87.12%	1.4932	0.63
					CMTM5+ITGB3-PLA2G7-ARHGEF10L-GPR124+CETP+MIA-MPP3	Sepsis_P	Inf1_P	0.7029	0.1102	0.5216 To 0.8842	0.1056	-0.2164	76	58.05% to 88.99%	57.14	22.53% to 87.12%	1.7732	0.42
					CMTM5+ITGB3-PLA2G7-ARHGEF10L+CETP+MIA+PLXNB3-MPP3	Sepsis_P	Inf1_P	0.6914	0.116	0.5007 To 0.8822	0.1267	-0.136	60	41.68% to 76.44%	57.14	22.53% to 87.12%	1.3999	0.7
					CMTM5+ITGB3-PLA2G7-GPR124-ARHGEF10L	Sepsis_FU	Inf1_P	0.6786	0.1901	0.3659 To 0.9913	0.3447	-0.0734	75	24.86% to 98.73%	57.14	22.53% to 87.12%	1.7499	0.4375
					CMTM5+ITGB3-PLA2G7-GPR124-ARHGEF10L	Sepsis_P	Inf1_P	0.6457	0.1159	0.4551 To 0.8363	0.2451	-0.0667	64	45.61% to 79.76%	57.14	22.53% to 87.12%	1.4932	0.63
					CMTM5+ITGB3-PLA2G7-ARHGEF10L+CETP+MIA+PLXNB3-MPP3	Sepsis_FU	Inf1_P	0.6429	0.1842	0.3398 To 0.9459	0.4168	-0.1637	60	18.93% to 92.36%	57.14	22.53% to 87.12%	1.3999	0.7
GSE131761	Gene expression patterns in septic and non-septic shock postsurgical patients	Martínez-Paz P Tamayo E , García-Morán E	Microarray, PCR	34144116	CMTM5+MIA+CETP-MPP3-PLA2G7	Septic shock	Control	0.9442	0.02253	0.9071 To 0.9812	< 0.0001	-0.2428	88.75	81.19% to 94.00%	100	81.90% to 100.0%		0.1125
					CMTM5+ITGB3-PLA2G7-GPR124-ARHGEF10L	Septic shock	Control	0.9433	0.0225	0.9063 To 0.9803	< 0.0001	-0.341	85	76.83% to 91.11%	100	81.90% to 100.0%		0.15
					CMTM5+ITGB3-PLA2G7-ARHGEF10L-GPR124+CETP+MIA-MPP3	Septic shock	Control	0.9375	0.02386	0.8983 To 0.9767	< 0.0001	-0.3647	86.25	78.27% to 92.09%	100	81.90% to 100.0%		0.1375
					CMTM5+ITGB3-PLA2G7-ARHGEF10L+CETP+MIA+PLXNB3-MPP3	Septic shock	Control	0.9358	0.02419	0.8960 To 0.9756	< 0.0001	-0.3621	86.25	78.27% to 92.09%	100	81.90% to 100.0%		0.1375
					CETP+MIA+PLXNB3-MPP3	Septic shock	Control	0.8067	0.04339	0.7353 To 0.8780	0.0001727	-0.0442	73.75	64.44% to 81.69%	80	56.02% to 94.32%	3.6875	0.3281
					CMTM5+ITGB3-PLA2G7-GPR124-ARHGEF10L	Septic shock	Non-septic shock	0.7235	0.04935	0.6424 To 0.8047	0.0002	-0.003186	70	60.48% to 78.37%	61.76	46.22% to 75.69%	1.8305	0.4858
					CMTM5+ITGB3-PLA2G7-ARHGEF10L-GPR124+CETP+MIA-MPP3	Septic shock	Non-septic shock	0.7154	0.05123	0.6312 To 0.7997	0.0003	0.0868	61.25	51.46% to 70.40%	70.59	55.24% to 83.09%	2.0826	0.5489
					CMTM5+ITGB3-PLA2G7-ARHGEF10L+CETP+MIA+PLXNB3-MPP3	Septic shock	Non-septic shock	0.7007	0.05285	0.6138 To 0.7877	0.0007	-0.001636	66.25	56.57% to 74.99%	61.76	46.22% to 75.69%	1.7325	0.5465
					CMTM5+MIA+CETP-MPP3-PLA2G7	Septic shock	Non-septic shock	0.6419	0.05657	0.5488 To 0.7350	0.0168	-0.03	63.75	54.00% to 72.71%	52.94	37.66% to 67.82%	1.3547	0.6847
					CETP+MIA+PLXNB3-MPP3	Septic shock	Non-septic shock	0.6235	0.05714	0.5295 To 0.7175	0.03742	-0.008287	65	55.29% to 73.85%	58.82	43.32% to 73.12%	1.5784	0.595
GSE9960	Gene-expression profiling of peripheral blood mononuclear cells in sepsis	Tang BM, Lin RC	Microarray, PCR	19237892	CMTM5+ITGB3-PLA2G7-GPR124-ARHGEF10L	Sepsis (mixed Infection), training set	SIRS	0.9167	0.07362	0.7956 To 1.038	0.006695	-4.69	100	60.70% to 100.0%	80	49.31% to 96.32%	5	0
					CMTM5+ITGB3-PLA2G7-GPR124-ARHGEF10L	Sepsis (Grampositive), training set	SIRS	0.88	0.1007	0.7144 To 1.046	0.0041	-4.29	90	60.58% to 99.49%	90	60.58% to 99.49%	9	0.1111
					CMTM5+ITGB3-PLA2G7-GPR124-ARHGEF10L	Sepsis (Gram-negative), training set	SIRS	0.8778	0.09261	0.7254 To 1.030	0.005502	-5.402	100	71.69% to 100.0%	70	39.34% to 91.27%	3.3333	0
					CMTM5+ITGB3-PLA2G7-ARHGEF10L-GPR124+CETP+MIA-MPP3	Sepsis (Gram-negative), training set	SIRS	0.8778	0.09261	0.7254 To 1.030	0.0055	2.165	100	71.69% to 100.0%	70	39.34% to 91.27%	3.3333	0
					CMTM5+ITGB3-PLA2G7-ARHGEF10L-GPR124+CETP+MIA-MPP3	Sepsis (Grampositive), training set	SIRS	0.8667	0.1042	0.6952 To 1.038	0.017	4.765	83.33	41.82% to 99.15%	90	60.58% to 99.49%	8.333	0.1852
					CMTM5+ITGB3-PLA2G7-ARHGEF10L-GPR124+CETP+MIA-MPP3	Sepsis (Gram-negative), validation set	SIRS	0.86	0.1026	0.6912 To 1.029	0.006502	3.136	80	49.31% to 96.32%	90	60.58% to 99.49%	8	0.2222
					CMTM5+MIA+CETP-MPP3-PLA2G7	Sepsis (mixed Infection), training set	SIRS	0.85	0.1097	0.6695 To 1.030	0.0227	8.688	100	60.70% to 100.0%	60	30.35% to 85.00%	2.5	0
					CMTM5+ITGB3-PLA2G7-ARHGEF10L+CETP+MIA+PLXNB3-MPP3	Sepsis (Grampositive), training set	SIRS	0.85	0.1097	0.6695 To 1.030	0.02274	15.05	83.33	41.82% to 99.15%	90	60.58% to 99.49%	8.333	0.1852
					CMTM5+ITGB3-PLA2G7-GPR124-ARHGEF10L	Sepsis	SIRS	0.8125	0.08132	0.6787 To 0.9463	0.0002251	-4.29	84.44	72.76% to 92.46%	81.25	58.34% to 94.69%	4.5035	0.1915
					CMTM5+ITGB3-PLA2G7-ARHGEF10L+CETP+MIA+PLXNB3-MPP3	Sepsis (Gram-negative), training set	SIRS	0.8111	0.1055	0.6375 To 0.9847	0.02224	13.38	66.67	34.49% to 90.23%	80	49.31% to 96.32%	3.3335	0.4166
					CMTM5+ITGB3-PLA2G7-ARHGEF10L-GPR124+CETP+MIA-MPP3	Sepsis	SIRS	0.8028	0.08081	0.6698 To 0.9357	0.0003512	2.948	80	67.69% to 89.15%	75	51.56% to 90.97%	3.2	0.2667
					CMTM5+ITGB3-PLA2G7-ARHGEF10L+CETP+MIA+PLXNB3-MPP3	Sepsis (Gram-negative), validation set	SIRS	0.8	0.1116	0.6165 To 0.9835	0.0233	13.18	70	39.34% to 91.27%	80	49.31% to 96.32%	3.5	0.375
					CMTM5+MIA+CETP-MPP3-PLA2G7	Sepsis (Gram-negative), training set	SIRS	0.7667	0.1155	0.5767 To 0.9567	0.05004	8.872	88.89	57.09% to 99.43%	60	30.35% to 85.00%	2.2223	0.1852
					CMTM5+ITGB3-PLA2G7-ARHGEF10L+CETP+MIA+PLXNB3-MPP3	Sepsis	SIRS	0.7667	0.08138	0.6328 To 0.9005	0.001644	13.18	71.11	58.04% to 81.99%	75	51.56% to 90.97%	2.8444	0.3852
					CMTM5+ITGB3-PLA2G7-GPR124-ARHGEF10L	Sepsis (mixed Infection), validation set	SIRS	0.75	0.1774	0.4581 To 1.042	0.2008	-3.804	100	47.29% to 100.0%	66.67	27.13% to 93.72%	3.0003	0
					CMTM5+ITGB3-PLA2G7-ARHGEF10L-GPR124+CETP+MIA-MPP3	Sepsis (mixed Infection), validation set	SIRS	0.75	0.1774	0.4581 To 1.042	0.2008	2.737	100	47.29% to 100.0%	66.67	27.13% to 93.72%	3.0003	0
					CMTM5+ITGB3-PLA2G7-GPR124-ARHGEF10L	Sepsis (Grampositive), vaidation set	SIRS	0.7381	0.1779	0.4455 To 1.031	0.1531	-4.193	100	65.18% to 100.0%	66.67	27.13% to 93.72%	3.0003	0
					CMTM5+ITGB3-PLA2G7-ARHGEF10L+CETP+MIA+PLXNB3-MPP3	Sepsis (mixed Infection), training set	SIRS	0.7381	0.1739	0.4521 To 1.024	0.1531	12.38	100	65.18% to 100.0%	66.67	27.13% to 93.72%	3.0003	0
					CMTM5+ITGB3-PLA2G7-ARHGEF10L-GPR124+CETP+MIA-MPP3	Sepsis (mixed Infection), training set	SIRS	0.7381	0.1739	0.4521 To 1.024	0.1531	2.486	100	65.18% to 100.0%	66.67	27.13% to 93.72%	3.0003	0
					CMTM5+MIA+CETP-MPP3-PLA2G7	Sepsis (Grampositive), training set	SIRS	0.73	0.1203	0.5321 To 0.9279	0.0821	8.707	80	49.31% to 96.32%	60	30.35% to 85.00%	2	0.3333
					CMTM5+ITGB3-PLA2G7-ARHGEF10L+CETP+MIA+PLXNB3-MPP3	Sepsis (mixed Infection), validation set	SIRS	0.7083	0.1918	0.3927 To 1.024	0.2864	12.72	100	47.29% to 100.0%	66.67	27.13% to 93.72%	3.0003	0
					CMTM5+MIA+CETP-MPP3-PLA2G7	Sepsis	SIRS	0.7056	0.08507	0.5656 To 0.8455	0.01524	8.859	80	67.69% to 89.15%	62.5	39.10% to 82.22%	2.1333	0.32
					CMTM5+MIA+CETP-MPP3-PLA2G7	Sepsis (Grampositive), vaidation set	SIRS	0.6429	0.1844	0.3395 To 0.9462	0.3914	8.96	85.71	47.93% to 99.27%	66.67	27.13% to 93.72%	2.5716	0.2143
					CETP+MIA+PLXNB3-MPP3	Sepsis (mixed Infection), validation set	SIRS	0.625	0.2135	0.2737 To 0.9763	0.5224	12.21	75	24.86% to 98.73%	50	15.32% to 84.68%	1.5	0.5
					CETP+MIA+PLXNB3-MPP3	Sepsis (mixed Infection), training set	SIRS	0.619	0.1732	0.3341 To 0.9040	0.4751	12.5	57.14	22.53% to 87.12%	83.33	41.82% to 99.15%	3.4277	0.5143
					CMTM5+ITGB3-PLA2G7-GPR124-ARHGEF10L	Sepsis (Gram-negative), validation set	SIRS	0.6111	0.17	0.3314 To 0.8908	0.4795	-4.248	66.67	34.49% to 90.23%	66.67	27.13% to 93.72%	2.0003	0.4999
					CMTM5+ITGB3-PLA2G7-ARHGEF10L-GPR124+CETP+MIA-MPP3	Sepsis (Grampositive), vaidation set	SIRS	0.6111	0.162	0.3447 To 0.8776	0.4795	2.22	66.67	34.49% to 90.23%	66.67	27.13% to 93.72%	2.0003	0.4999
					CMTM5+MIA+CETP-MPP3-PLA2G7	Sepsis (mixed Infection), validation set	SIRS	0.5833	0.2108	0.2365 To 0.9301	0.6698	9.694	75	24.86% to 98.73%	66.67	27.13% to 93.72%	2.2502	0.375
					CETP+MIA+PLXNB3-MPP3	Sepsis (Grampositive), training set	SIRS	0.5571	0.1476	0.3143 To 0.8000	0.6963	12.27	57.14	22.53% to 87.12%	50	22.24% to 77.76%	1.1428	0.8572
					CMTM5+ITGB3-PLA2G7-ARHGEF10L+CETP+MIA+PLXNB3-MPP3	Sepsis (Grampositive), vaidation set	SIRS	0.5556	0.1646	0.2847 To 0.8264	0.7237	13.3	55.56	25.14% to 83.12%	66.67	27.13% to 93.72%	1.667	0.6666
					CETP+MIA+PLXNB3-MPP3	Sepsis (Gram-negative), training set	SIRS	0.5222	0.1464	0.2813 To 0.7631	0.8703	12.27	66.67	34.49% to 90.23%	50	22.24% to 77.76%	1.3334	0.6666
					CETP+MIA+PLXNB3-MPP3	Sepsis	SIRS	0.5139	0.08749	0.3700 To 0.6578	0.8698	12.24	51.11	37.99% to 64.12%	50	27.86% to 72.14%	1.0222	0.9778
					CMTM5+MIA+CETP-MPP3-PLA2G7	Sepsis (Gram-negative), validation set	SIRS	0.4815	0.1726	0.1975 To 0.7655	0.9062	9.6	55.56	25.14% to 83.12%	66.67	27.13% to 93.72%	1.667	0.6666
					CETP+MIA+PLXNB3-MPP3	Sepsis (Grampositive), vaidation set	SIRS	0.463	0.1681	0.1864 To 0.7395	0.8137	12.08	55.56	25.14% to 83.12%	50	15.32% to 84.68%	1.1112	0.8888
					CETP+MIA+PLXNB3-MPP3	Sepsis (Gram-negative), validation set	SIRS	0.4333	0.1425	0.1989 To 0.6678	0.6242	11.81	55.56	25.14% to 83.12%	40	15.00% to 69.65%	0.926	1.111
GSE28750	Development and Validation of a Novel Molecular Biomarker Diagnostic Test for the Early Detection of Sepsis	Sutherland A, Thomas M, Brandon RA, Brandon RB, Lipman J, Tang B, McLean A, Pascoe R, Price G, Nguyen T, Stone G, Venter D	Microarray, Paxgene	21682927	CETP+MIA+PLXNB3-MPP3	Sepsis	Healthy	0.89	0.08246	0.7544 To 1.026	0.0006002	9.685	80	49.31% to 96.32%	80	59.90% to 92.86%	4	0.25
					CMTM5+ITGB3-PLA2G7-ARHGEF10L+CETP+MIA+PLXNB3-MPP3	Sepsis	Healthy	0.875	0.08748	0.7311 To 1.019	0.0009684	10.14	80	49.31% to 96.32%	100	86.09% to 100.0%		0.2
					CMTM5+CETP+MIA-PLA2G7-MPP3	Sepsis	Healthy	0.835	0.1116	0.6515 To 1.019	0.003202	8.114	80	49.31% to 96.32%	100	86.09% to 100.0%		0.2
					CMTM5+ITGB3-PLA2G7-ARHGEF10L-GPR124+CETP+MIA-MPP3	Sepsis	Healthy	0.83	0.1145	0.6416 To 1.018	0.003689	0.6274	80	49.31% to 96.32%	100	86.09% to 100.0%		0.2
					CMTM5+ITGB3-PLA2G7-GPR124-ARHGEF10L	Sepsis	Healthy	0.805	0.1301	0.5909 To 1.019	0.007282	-4.835	80	49.31% to 96.32%	100	86.09% to 100.0%		0.2
					CMTM5+CETP+MIA-PLA2G7-MPP3	Sepsis	Post-surgical	0.8182	0.1002	0.6533 To 0.9831	0.01372	8.11	80	49.31% to 96.32%	81.82	52.99% to 96.67%	4.4004	0.2444
					CETP+MIA+PLXNB3-MPP3	Sepsis	Post-surgical	0.8182	0.1027	0.6492 To 0.9872	0.01372	9.831	80	49.31% to 96.32%	81.82	52.99% to 96.67%	4.4004	0.2444
					CMTM5+ITGB3-PLA2G7-ARHGEF10L+CETP+MIA+PLXNB3-MPP3	Sepsis	Post-surgical	0.8	0.09917	0.6369 To 0.9631	0.02014	9.785	80	49.31% to 96.32%	72.73	43.56% to 92.12%	2.9336	0.275
					CMTM5+ITGB3-PLA2G7-ARHGEF10L-GPR124+CETP+MIA-MPP3	Sepsis	Post-surgical	0.7545	0.1274	0.5450 To 0.9641	0.04864	1.137	80	49.31% to 96.32%	81.82	52.99% to 96.67%	4.4004	0.2444
					CMTM5+ITGB3-PLA2G7-GPR124-ARHGEF10L	Sepsis	Post-surgical	0.7091	0.1329	0.4905 To 0.9277	0.1053	-4.639	80	49.31% to 96.32%	72.73	43.56% to 92.12%	2.9336	0.275
GSE74224**	Discrimination of SIRS from Sepsis in Critically Ill Adult	Leo M, Thomas Y	Retrospective	26645559
GSE65682*	Genome-wide blood transcriptional profiling in critically ill patients - MARS consortium	Scicluna BP, van der Poll T	Blood microarray	26121490	CMTM5+ITGB3-PLA2G7-GPR124-ARHGEF10L	Abdominal sepsis	Healthy control	0.9855	0.009125	0.9705 To 1.001	< 0.0001	-0.3954	90.2	80.48% to 96.06%	100	93.12% to 100.0%		0.098
					CMTM5+ITGB3-PLA2G7-GPR124-ARHGEF10L	Abdominal sepsis	CNTRL GI	0.9066	0.03176	0.8544 To 0.9589	< 0.0001	-0.0632	88.24	78.09% to 94.75%	83.33	70.96% to 91.91%	5.2933	0.1411
					CMTM5+ITGB3-PLA2G7-GPR124-ARHGEF10L	Abdominal sepsis	No CAP	0.8942	0.0356	0.8356 To 0.9529	< 0.0001	0.1083	86.27	75.76% to 93.38%	78.79	63.82% to 89.60%	4.0674	0.1743
					CMTM5+ITGB3-PLA2G7-GPR124-ARHGEF10L	Abdominal sepsis	Other	0.752	0.0337	0.6965 To 0.8074	< 0.0001	1.154	70.59	58.38% to 80.92%	69.53	65.73% to 73.13%	2.3167	0.423
					CMTM5+ITGB3-PLA2G7-GPR124-ARHGEF10L	Abdominal sepsis	CAP-No sepsis	0.7393	0.0411	0.6718 To 0.8068	< 0.0001	1.254	68.63	56.33% to 79.23%	71.3	63.29% to 78.41%	2.3913	0.44
					CMTM5+ITGB3-PLA2G7-GPR124-ARHGEF10L	Abdominal sepsis	HAP-No sepsis	0.7035	0.0467	0.6267 To 0.7804	< 0.0001	1.142	70.59	58.38% to 80.92%	60.24	50.63% to 69.29%	1.7754	0.4882
	*Missing MPP3 and MIA cannot perform other signatures
	**Missing ITGB3

## Sheet: S5.5
Signature	Dataset	Genes	Equation	Cases	Controls	ROC Curve Area	Standard Error	90% Confidence Interval	P Value	Cutoff <	Sensitivity %	90% CI	Specificity %	90% CI	LR +	LR -
Septicyte Lab	GSE74224**	CEACAM4, LAMP1, PLAC8, PLA2G7	PLAC8-PLA2G7+LAMP1-CEACAM4	Patients with sepsis	surgical patients with post-operative systemic inflammation	0.8377	0.03317	0.7831 To 0.8922	< 0.0001	-1.048	85.48	79.24% to 90.40%	56.41	42.06% to 70.00%	1.961	0.2574
FAIM3/PLAC8 [26121490[	GSE65682	FAIM3, PLAC8	FAIM3/PLAC8	Patients with probable/definite CAP	Patients suspected of CAP, having their diagnosis refuted	0.5986	0.054	0.5098 To 0.6875	0.06354	1.244	85.48	79.24% to 90.40%	28.21	16.69% to 42.34%	1.1907	0.5147
sNIP score [28972859]	GSE65682	NLRP1, IDNK, PLAC8	(NLRP1-IDNK)/PLAC8	Patients with abdominal sepsis	Postoperative GI surgery patients	0.5156	0.03295	0.4614 To 0.5698	0.6459	1.496	85.14	81.49% to 88.30%	10.75	5.951% to 17.56%	0.9539	1.3823
Bauer Gene expression score [27211554]		TLR5,CD59,CLU, FGL2, IL7R, HLA-DPA1,CPVL	TLR5+CD59	Patients with sepsis	Patients with SIRS	0.7887	0.03688	0.7280 To 0.8493	< 0.0001	-2.118	85.48	79.24% to 90.40%	38.46	25.41% to 52.89%	1.389	0.3775
Sepsis Meta Score [25972003]	various	CAECAM1, ZDHHC19, C9orf95, GNA15, BATF, C3AR1, KIAA1370, TGFBI, MTCH1, RPGRIP1, HLA-DPB1	6√CEACAM1*ZDHHC19*C9orf95*GNA15*BATF*C3AR1 - 5/6*5√KIAA1370*TGFBI*MTCH1*RPGRIP1*HLA-DPB1	Adults with sepsis, Neonates with sepsis	Adults with SIRS, COPD patients, Patients after trauma Neonates with SIRS	0.5252	0.05429	0.4359 To 0.6145	0.6351	0.1529	85.48	79.24% to 90.40%	20.51	10.64% to 33.98%	1.0754	0.7079
